# Supplementary material for: Morphological descriptions and morphometric discriminant function analysis reveal an additional four groups of Scylla spp
Source: PeerJ. 2020 Jan 3;8:e8066. doi: 10.7717/peerj.8066 (PMC6944125; doi:10.7717/peerj.8066)
Supplement: Table S1 [file peerj-08-8066-s001.xlsx]

## Sheet: S1
Supplementary Table S1: Screening numbers and locations of mud crab genus Scylla.
										Note: * = samples were from Fazhan et al.10,21, SO = Scylla olivacea, ST = Scylla tranquebarica, SP = Scylla paramamosain, SS = Scylla serrata.
				Species
Location	SO	ST	SP	SS*	SH 1	SH 2	SH 3	SH 4
Sulu Sea
Pitas	1023	3860	3112	0	611	36	0	0
Sandakan	800	5655	5912	1	1763	100	1	2
Kota marudu	457	2301	2365	1	232	0	0	0
Tuaran	550	456	389	0	21	0	0	0
Tenghilan	221	32	57	0	0	0	0	0
Kinarut	23	432	541	0	0	0	0	0
South China Sea
Asajaya	3123	700	1765	0	0	0	0	0
Samarahan	2436	312	565	0	0	0	0	0
Santubong	246	21	56	0	0	0	0	0
Buntal	337	35	75	0	0	0	0	0
Sematan	878	899	652	0	0	0	0	0
Sampadi	165	132	54	0	0	0	0	0
Lundu	313	76	21	0	0	0	0	0
Setiu	5678	3452	3389	0	0	0	0	0
Kemaman	112	13	2	0	0	0	0	0
Malacca Straits
Kuala Sepetang	8677	2321	1099	1	0	0	0	0
Kuala Terung	2987	454	325	0	0	0	0	0
Kuala gula	3324	386	188	0	0	0	0	0
Total (n)	31350	21537	20567	3	2627	136	1	2
N	76211
