# Supplementary material for: Morphological descriptions and morphometric discriminant function analysis reveal an additional four groups of Scylla spp
Source: PeerJ. 2020 Jan 3;8:e8066. doi: 10.7717/peerj.8066 (PMC6944125; doi:10.7717/peerj.8066)
Supplement: Table S2 [file peerj-08-8066-s002.xlsx]

## Sheet: S2
Supplementary Table S2: The range and average values of the least needed ratios for each divisor (morphological character) to achieve a discriminant of 100% in males.
		S. olivacea (n = 300)		S. tranquebarica (n = 300)		S. paramamosain (n = 300)		SH 1 (n = 300)		SH 2 (n = 136)
Divisor	Ratio	Range	Mean ± sd	Range	Mean ± sd	Range	Mean ± sd	Range	Mean ± sd	Range	Mean ± sd
CW	ICS/CW	0.00000-0.00000	0.00000±0.0000	0.00911-0.01410	0.01169±0.0013	0.00000-0.00000	0.00000±0.0000	0.00000-0.00000	0.00000±0.0000	0.00000-0.00355	0.00169±0.0012
	OCS/CW	0.00500-0.00939	0.00707±0.0011	0.00914-0.01426	0.01165±0.0014	0.01440-0.02274	0.01766±0.0015	0.00931-0.01370	0.01159±0.0012	0.02005-0.02245	0.02136±0.0006
	3PCL/CW	0.25196-0.30904	0.28157±0.0106	0.20486-0.28332	0.23819±0.0157	0.21046-0.27038	0.23431±0.0105	0.17381-0.25297	0.21129±0.0143	0.23001-0.31199	0.27180±0.0136
	FMSH/CW	0.01219-0.01611	0.01455±0.0007	0.01718-0.02326	0.01953±0.0011	0.02096-0.02688	0.02312±0.0009	0.01237-0.01786	0.01505±0.0010	0.01915-0.02462	0.02159±0.0011
	5PW/CW	0.13313-0.16330	0.14879±0.0056	0.13371-0.17536	0.15176±0.0074	0.13390-0.17196	0.14871±0.0065	0.13051-0.18567	0.15912±0.0099	0.12338-0.16526	0.14345±0.0070
	FW/CW	0.40179-0.49272	0.44895±0.0169	0.33487-0.42858	0.37581±0.0164	0.32768-0.42084	0.36469±0.0161	0.33244-0.47172	0.39465±0.0256	0.37016-0.50610	0.43318±0.0230
	PWC/CW	0.27534-0.33767	0.30765±0.0116	0.26101-0.35439	0.30111±0.0179	0.30088-0.38646	0.33327±0.0138	0.26597-0.37523	0.31376±0.0199	0.25132-0.34551	0.29539±0.0131
ICW	ICS/ICW	0.00000-0.00000	0.00000±0.0000	0.00972-0.0153	0.01256±0.0015	0.00000-0.00000	0.00000±0.0000	0.00000-0.00000	0.00000±0.0000	0.00000-0.00379	0.00180±0.0013
	OCS/ICW	0.00535-0.01004	0.00759±0.0012	0.00979-0.01531	0.01252±0.0015	0.01524-0.02431	0.018948±0.0016	0.01005-0.01484	0.01244±0.0013	0.02131-0.02438	0.02278±0.0007
	3PCL/ICW	0.26807-0.33149	0.30236±0.0114	0.21795-0.32077	0.25587±0.0170	0.22509-0.28738	0.25143±0.0116	0.18546-0.27629	0.22682±0.0156	0.24179-0.33569	0.28992±0.0154
	FMSH/ICW	0.01305-0.01726	0.01563±0.0007	0.01828-0.02489	0.02098±0.0012	0.02240-0.02857	0.02481±0.0010	0.01320-0.01917	0.01616±0.0011	0.02037-0.02670	0.02303±0.0012
	5PW/ICW	0.14169-0.17521	0.15977±0.0060	0.14225-0.18875	0.163023±0.0081	0.14320-0.18277	0.15957±0.0071	0.13925-0.20193	0.17081±0.0109	0.12979-0.17833	0.15301±0.0080
	FW/ICW	0.42748-0.52857	0.48210±0.0181	0.35626-0.46143	0.40370±0.0182	0.35042-0.44729	0.39133±0.018	0.35337-0.50624	0.42365±0.0280	0.39539-0.54614	0.46208±0.0262
	PWC/ICW	0.29294-0.36224	0.33037±0.0124	0.27768-0.38147	0.32345±0.01947	0.32184-0.41076	0.35761±0.0149	0.28402-0.40890	0.33682±0.0219	0.26420-0.37467	0.31509±0.0150
	3PML/ICW	0.44317-0.54801	0.49984±0.0188	0.36549-0.51197	0.42851±0.0289	0.38712-0.49413	0.43125±0.0193	0.30660-0.45524	0.37772±0.0257	0.40002-0.54327	0.47853±0.0236
8CW	ICS/8CW	0.00000-0.00000	0.00000-0.0000	0.00927-0.01423	0.01185±0.0014	0.00000-0.00000	0.00000±0.0000	0.00000-0.00000	0.00000±0.0000	0.00000-0.00360	0.00170±0.0012
	FMSH/8CW	0.01195-0.01576	0.01434±0.0007	0.01747-0.02372	0.01981±0.0011	0.02120-0.02720	0.02348±0.0010	0.01220-0.01774	0.01492±0.0010	0.01914-0.02463	0.02171±0.0011
	3PCL/8CW	0.24593-0.30284	0.27751±0.0110	0.20829-0.28723	0.24149±0.0158	0.21303-0.27353	0.23792±0.0108	0.17142-0.24998	0.20943±0.0143	0.23382-0.31401	0.27328±0.0139
	OCS/8CW	0.00493-0.00950	0.00697±0.0011	0.00931-0.01448	0.01181±0.0014	0.01458-0.02319	0.01793±0.0015	0.00920-0.01359	0.01149±0.0012	0.02026-0.02287	0.02148±0.0006
	5PW/8CW	0.12996-0.16000	0.14664±0.0058	0.13595-0.17778	0.15386±0.0075	0.13553-0.17397	0.15100±0.0066	0.12871-0.18498	0.15771±0.0098	0.12339-0.16682	0.14423±0.0072
	FW/8CW	0.39210-0.42484	0.44248±0.0176	0.34047-0.43449	0.38103±0.0168	0.33166-0.42574	0.37030±0.0165	0.32702-0.46814	0.39117±0.0256	0.36757-0.51386	0.43555±0.0238
PWC	ICS/PWC	0.00000-0.00000	0.00000±0.0000	0.02947-0.05154	0.03897±0.0052	0.00000-0.00000	0.00000±0.0000	0.00000-0.00000	0.00000±0.0000	0.00000-0.01198	0.00571±0.0041
	FMSH/PWC	0.04071-0.04778	0.04731±0.0014	0.06292-0.07763	0.06492±0.0022	0.06170-0.07909	0.06942±0.0020	0.03901-0.05738	0.04811±0.0037	0.06339-0.08507	0.07315±0.0035
	3PCL/PWC	0.91494-0.91553	0.91523±0.0001	0.71974-0.82306	0.79081±0.011	0.62817-0.81773	0.70331±0.0225	0.55012-0.82458	0.67531±0.0533	0.79276-1.06522	0.92109±0.0474
	OCS/PWC	0.01543-0.03051	0.02300±0.0036	0.02780-0.04922	0.03883±0.0051	0.04164-0.06734	0.05307±0.0050	0.02652-0.05085	0.03711±0.0047	0.06072-0.08067	0.07246±0.0038
	5PL/PWC	1.01725-1.01786	1.01756±0.0001	0.81036-0.97541	0.86749±0.0492	0.84188-1.06951	0.94132±0.0298	0.85390-1.34031	1.08017±0.0811	0.88388-1.19823	1.02917±0.0546
	FW/PWC	1.45892-1.45967	1.45930±0.0002	1.13312-1.33136	1.24962±0.03756	0.98252-1.25826	1.09464±0.0336	1.00262-1.57306	1.26177±0.1016	1.25289-1.75695	1.46813±0.0828
CL	ICS/CL	0.00000-0.00000	0.00000-0.0000	0.01352-0.02354	0.01836±0.0023	0.00000-0.00000	0.00000±0.0000	0.00000-0.00000	0.00000±0.0000	0.00000-0.00518	0.00246-0.0018
	FMSH/CL	0.01756-0.02062	0.02041±0.0006	0.02998-0.03621	0.03061±0.0008	0.03179-0.04030	0.03718±0.0016	0.01826-0.02823	0.02277±0.0017	0.02744-0.03692	0.03140±0.0017
	3PCL/CL	0.39478-0.39497	0.39487±4.2×10-5	0.33608-0.39335	0.37325±0.0174	0.32595-0.42051	0.37654±0.0135	0.25983-0.39864	0.31976±0.0259	0.33680-0.46411	0.39534±0.5220
	PWC/CL	0.43135-0.43155	0.43145-4×10-5	0.42874-0.51391	0.47187±0.0181	0.45720-0.57806	0.53570±0.02027	0.39207-0.57484	0.47473±0.0354	0.36198-0.51128	0.42974±0.0220
	OCS/CL	0.00666-0.01316	0.00992±0.0016	0.01338-0.02252	0.01829±0.0023	0.02100-0.03509	0.02843±0.0029	0.01185-0.02267	0.01757±0.0022	0.02599-0.03575	0.03111±0.0017
	5PW/CL	0.20858-0.20874	0.20866±4×10-5	0.21593-0.25679	0.23784±0.0055	0.20075-0.25467	0.23898±0.0083	0.19589-0.29926	0.24081±0.0185	0.17489-0.24775	0.20871±0.0120
	3PML/CL	0.65266-0.65289	0.65278±4.6×10-5	0.53928-0.66023	0.62515±0.0310	0.55035-0.71462	0.64583±0.02174	0.43559-0.64701	0.53230±0.0403	0.56282-0.74560	0.65258±0.0331
	DFLS/CL	0.06928-0.06943	0.06936±3.7×10-5	0.06538-0.08433	0.07119±0.0062	0.05977-0.07726	0.07158±0.0025	0.05510-0.08558	0.06864±0.0051	0.06397-0.09008	0.07560±0.0046
FW	ICS/FW	0.00000-0.00000	0.00000±0.0000	0.02312-0.04017	0.03118±0.0039	0.00000-0.00000	0.00000±0.0000	0.00000-0.00000	0.00000±0.0000	0.00000-0.00838	0.00391±0.0028
	FMSH/FW	0.02789-0.03275	0.03242±0.0009	0.05115-0.06392	0.05197±0.0016	0.05530-0.07157	0.06345±0.0019	0.03034-0.04680	0.03825±0.0029	0.04356-0.05783	0.04991±0.0025
	5PW/FW	0.33127-0.33155	0.33141±6.6×10-5	0.38170-0.44457	0.40378±0.0062	0.35247-0.46543	0.40798±0.0127	0.32752±0.49823	0.40437±0.0303	0.27671-0.38988	0.33172±0.01831
	OCS/FW	0.01057-0.02090	0.01576±0.0025	0.02284-0.03836	0.03106±0.0039	0.03687-0.06003	0.04852±0.0047	0.02063-0.04010	0.02951±0.0038	0.03979-0.05737	0.04944±0.0028
	3PCL/FW	0.62700-0.62732	0.62717±6.9×10-5	0.57810-0.68340	0.63354±0.02468	0.56531-0.73869	0.64277±0.0195	0.42277-0.65202	0.53704±0.0435	0.52091-0.74342	0.62836±0.0320
FMSH	ICS/FMSH	0.00000-0.00000	0.00000±0.0000	0.40553-0.78238	0.60052±0.07819	0.00000-0.00000	0.00000±0.0000	0.00000-0.00000	0.00000±0.0000	0.00000-0.16981	0.07856±0.0567
	FW/FMSH	30.5357-35.8504	30.8802±1.0804	15.64414-19.55026	19.25779±0.5429	13.97297-18.08444	14.77640±0.4947	21.36957-32.95890	26.29562±2.0293	17.29249-22.95434	20.08756±1.0081
	5PW/FMSH	10.1197-11.8819	10.2339±0.3580	6.41176-7.86486	7.77447±0.19344	5.69412-7.48000	6.43370±0.2140	8.63333-13.13605	10.60547±0.8366	5.63347-7.67580	6.65391±0.34658
	OCS/FMSH	0.32432-0.66116	0.48668±0.0780	0.44130-0.74737	0.59813±0.0767	0.60338-0.96104	0.76482±0.0714	0.53073-1.06849	0.77375±0.0995	0.85200-1.11712	0.99181±0.0537
	3PCL/FMSH	19.1489-22.4882	19.3671±0.6775	9.99550-12.70721	12.19639±0.4827	9.12500-11.76000	10.13702-0.3505	11.12500-17.49660	15.07848±1.1118	10.95257-14.34703	12.60486±0.6134
DFLS	ICS/DFLS	0.00000-0.00000	0.00000-0.0000	0.16730-0.35952	0.26007±0.0414	0.00000-0.00000	0.00000±0.0000	0.00000-0.00000	0.00000±0.0000	0.00000-0.06890	0.03254±0.02341
	FMSH/DFLS	0.25299-0.29747	0.29428±0.0090	0.39821-0.46081	0.43236±0.0292	0.45363-0.57848	0.51949±0.0171	0.27652-0.41913	0.33274±0.0257	0.35761-0.49020	0.41621±0.0234
	5PL/DFLS	6.32347-6.33680	6.32990±0.0034	5.03509-6.34229	5.78819±0.5906	6.33202-8.07692	7.04369±0.2181	5.97649-9.25339	7.47350±0.5972	4.81068-6.79846	5.85431±0.3248
	3PML/DFLS	9.40204-9.42204	9.41180±0.0050	6.89628-9.19451	8.81559±0.4538	7.83234-10.3251	9.02831±0.31644	6.32472-9.61435	7.77601±0.5840	7.33607-10.19423	8.65059±0.4845
	OCS/DFLS	0.09600-0.18990	0.14307±0.02241	0.17610-0.34328	0.25907±0.041	0.30065-0.51570	0.39723±0.0383	0.17636-0.34216	0.25675±0.033	0.32848-0.48170	0.041223±0.0236
	PD/DFLS	6.84584-6.86071	6.85300±0.0037	5.48824-8.31306	6.96553±1.1528	6.48919-8.42451	7.53678±0.2240	6.07595-9.35281	7.59674±0.59866	5.05977-6.70270	5.66150±0.26113
	DL/DFLS	7.82563-7.84277	7.83403±0.0043	6.33922-7.28074	7.10403±0.19619	6.44752-8.30641	7.47885±0.22652	5.39602-8.30562	6.74609±0.53163	5.92395-6.70270	0.39020±0.3902
DFMS	ICS/DFMS	0.00000-0.00000	0.00000±0.0000	0.17293-0.28927	0.22637±0.0280	0.00000-0.00000	0.00000±0.0000	0.00000-0.00000	0.00000±0.0000	0.00000-0.06863	0.03227±0.0233
	FMSH/DFMS	0.26186-0.30786	0.30451±0.0093	0.36842-0.43651	0.37746±0.0115	0.43436-0.55246	0.48537±0.0188	0.27407-0.41055	0.34035±0.0248	0.35987-0.46840	0.41163±0.0199
	3PCL/DFMS	5.88428-5.89809	5.89129±0.0034	4.15543-4.86097	4.60340±0.2245	4.54851-5.83592	4.92006±0.2541	3.91461-5.85682	4.77838±0.3702	4.41391-6.03940	5.18300±0.26327
	5PW/DFMS	3.10917-3.11715	3.11307±0.0018	2.64860-3.11133	2.93308±0.0671	2.92085-3.68271	3.12217±0.14855	2.90038-4.41876	3.59948±0.2757	2.41908-3.05360	2.73548±0.1365
	OCS/DFMS	0.09938-0.19640	0.14804±0.02319	0.16462-0.27795	0.22556±0.0279	0.28961-0.49251	0.37090±0.0343	0.18267-0.36364	0.26250±0.0325	0.34405-0.46126	0.40784±0.02296
	PWC/DFMS	6.42979-6.44397	6.43696±0.0037	5.32150-6.15369	5.81932±0.2298	6.57822-8.00473	6.99616±0.29415	5.67037-8.72769	7.09908±0.5666	4.82285-6.84805	5.63574±0.3092
	FW/DFMS	9.38347-9.40397	9.39347±0.0053	6.46729-7.59281	7.26386±0.1093	6.91506-9.27991	7.65773±0.3912	7.10409-10.88688	8.92890±0.7210	7.15563-9.61185	8.25726±0.37935
	3PML/DFMS	9.72881-9.75000	9.73906±0.0055	6.71028-8.15920	7.70964±0.3880	7.82341-9.93217	8.43724±0.3897	6.37453-9.67366	7.95608±0.5951	7.32285-10.12284	6.55430±0.3931
SW	ICS/SW	0.00000-0.00000	0.00000±0.0000	0.01790-0.03094	0.02348±0.0031	0.00000-0.00000	0.00000±0.0000	0.00000-0.00000	0.00000±0.0000	0.00000-0.00670	0.00318±0.0023
	FMSH/SW	0.02275-0.02670	0.26430±0.0008	0.03814-0.04685	0.03912±0.0011	0.04230-0.05516	0.04720±0.0013	0.02400-0.03701	0.03027±0.0024	0.03276-0.04717	0.04060±0.0019
	3PCL/SW	0.51129-0.51155	0.51142±5.4×10-5	0.43154-0.49591	0.47662±0.0079	0.43514-0.53541	0.47817±0.0142	0.33722-0.51728	0.42481±0.0337	0.43358-0.58623	0.51117±0.0259
	OCS/SW	0.00862-0.01704	0.01285±0.0020	0.01686-0.02954	0.02340±0.0031	0.02761-0.04461	0.03609±0.0034	0.01686-0.03117	0.02337±0.0031	0.03440-0.04628	0.04023±0.0023
	5PW/SW	0.27014-0.27035	0.27024±5.2×10-5	0.28277-0.32096	0.30395±0.0044	0.27489-0.33775	0.30346±0.0078	0.25321-0.39398	0.32011±0.0265	0.23259-0.32105	0.26992±0.0160
	PWC/SW	0.55866-0.55891	0.55879±5.6×10-5	0.56320-0.65268	0.60270±0.0057	0.58094-0.75172	0.68019±0.0187	0.50744-0.78220	0.63086±0.0482	0.47152-0.65031	0.55565±0.02746
	3PML/SW	0.84529-0.84559	0.84544±6.8×10-5	0.69425-0.81367	0.79823±0.01637	0.73205-0.91373	0.82014±0.0221	0.56246-0.84804	0.70767±0.0587	0.74499-0.99943	0.84391±0.0442
	FW/SW	0.81529-0.81558	0.81544±6.7×10-5	0.67542-0.81261	0.75302±0.0197	0.68003-0.82886	0.74420±0.0202	0.63999-0.95948	0.79358±0.0620	0.68571-0.98537	0.81467±0.0443
	DFLS/SW	0.08973-0.08992	0.08983±4.9×10-5	0.08592-0.10822	0.09081±0.0053	0.07993-0.09998	0.09090±0.0027	0.07219-0.11311	0.09126±0.0075	0.08274-0.11512	0.09772±0.0052
	5PL/SW	0.56847-0.56874	0.56860±5.5×10-5	0.49131-0.60115	0.52267±0.02729	0.58203-0.72989	0.63997±0.0184	0.53739-0.83907	0.67974±0.0545	0.47405-0.67647	0.57117±0.0306
	PD/SW	0.61546-0.61573	0.61559±5.4×10-5	0.51600-0.79535	0.63720±0.13640	0.60972-0.78468	0.68482±0.0207	0.54592-0.84818	0.69112±0.0567	0.47600-0.66121	0.55258±0.0287
	DL/SW	0.70358-0.70384	0.70371±5.2×10-5	0.62538-0.72394	0.64408±0.0206	0.60234-0.77630	0.67949±0.0187	0.48480-0.75321	0.61373±0.0503	0.60589-0.84607	0.70024±0.03812
AW	ICS/AW	0.00000-0.00000	0.00000±0.0000	0.03626-0.06268	0.04799±0.0061	0.00000-0.00000	0.00000±0.0000	0.00000-0.00000	0.00000±0.0000	0.00000-0.01421	0.00664±0.00478
	FMSH/AW	0.04730-0.05553	0.05497±0.0017	0.07863-0.09843	0.07999±0.0026	0.08173-0.10472	0.09399±0.0032	0.02794-0.04327	0.03474±0.0027	0.07379-0.10008	0.08472±0.0046
	3PCL/AW	1.06319-1.06396	1.06357±0.0002	0.93432-1.04876	0.97462±0.0233	0.81628-1.07028	0.95223±0.0312	0.39003-0.59555	0.48762±0.03879	0.92736-1.26330	1.06639±0.0534
	OCS/AW	0.01793-0.03545	0.02673±0.0042	0.03475-0.05984	0.04782±0.0061	0.05551-0.09083	0.07187±0.0069	0.01869-0.03647	0.02681±0.0035	0.06973-0.09801	0.08393±0.0050
	5PW/AW	0.56175-0.56228	0.56201±0.0001	0.58846-0.67915	0.62141±0.0063	0.52235-0.68458	0.60435±0.0190	0.29205-0.45970	0.36737±0.02959	0.47621-0.64153	0.56292±0.0294
	FW/AW	1.69534-1.69630	1.69583±0.0002	1.43688-1.64129	1.53932±0.0268	1.29318-1.63943	1.48209±0.0476	0.73180-1.11743	0.91060±0.0677	1.48997-2.01023	1.69971±0.0925
	PWC/AW	1.16172-1.16249	1.16208±0.00016	1.18111-1.35916	1.23238±0.0210	1.17581-1.56035	1.35462±0.0449	0.58199-0.90529	0.72411±0.0554	0.97544-1.36192	1.15972±0.0657
	3PML/AW	1.75772-1.75871	1.75822±0.0002	1.49086-1.67768	1.63218±0.0406	1.41456-1.85200	1.63324±0.0498	0.65698-1.00789	0.81182±0.0620	1.48523-2.03145	1.76064±0.0906
	DFLS/AW	0.18660-0.18700	0.18681±9.9×10-5	0.17157-0.22953	0.18578±0.0128	0.15969-0.20450	0.18102±0.0057	0.08392-0.13103	0.10473±0.0085	0.17212-0.23760	0.20389±0.0113
	5PL/AW	1.18207-1.18289	1.18249±0.0002	1.01290-1.24510	1.06834±0.0498	1.11424-1.46772	1.27432±0.0365	0.62244-0.95960	0.78005±0.0604	1.01355-1.41532	1.19165±0.0627
	PD/AW	1.27980-1.28061	1.28021±0.0002	1.02860-1.63984	1.30506±0.2896	1.19884-1.56674	1.36367±0.0426	0.64446-0.97562	0.79270±0.05785	1.00337-1.35097	1.15295±0.0615
	DL/AW	1.46304-1.46389	1.46347±0.0002	1.24643-1.51633	1.31735±0.0551	1.18797-1.48595	1.35310±0.0398	0.57228-0.86639	0.70394±0.0514	1.23181-1.69759	1.46098±0.0795
3PML	ICS/3PML	0.00000-0.00000	0.00000±0.0000	0.02200-0.03916	0.02944±0.0040	0.00000-0.00000	0.00000±0.0000	0.00000-0.00000	0.00000±0.0000	0.00000-0.00817	0.00376±0.0027
	FMSH/3PML	0.02691-0.03159	0.03127±0.0010	0.04688-0.06173	0.04906±0.0024	0.04957-0.06503	0.05758±0.0020	0.03437-0.05232	0.04290±0.0031	0.04154-0.05645	0.04819±0.0027
	5PL/3PML	0.67238-0.67271	0.67255±6.8×10-5	0.60390-0.78717	0.65564±0.0458	0.71524-0.89608	0.78062±0.0229	0.77263-1.16246	0.96305±0.0668	0.56068-0.77368	0.67766±0.0347
	OCS/3PML	0.01020-0.02016	0.01520±0.0024	0.02072-0.03739	0.02934±0.0040	0.03310-0.05360	0.04401±0.0041	0.02235-0.04436	0.03309±0.0041	0.04018-0.05780	0.04772±0.0026
	PD/3PML	0.72797-0.72829	0.72813±7.2×10-5	0.65322-0.97766	0.79598±0.1579	0.72417-0.93025	0.83531±0.0250	0.78778-1.22634	0.97988±0.0797	0.57054-0.76645	0.65560±0.0327
	DL/3PML	0.83220-0.83254	0.83236±7.2×10-5	0.79166-0.98383	0.80699±0.0238	0.71872-0.92494	0.82892±0.0265	0.69967-1.08877	0.87016±0.0707	0.71836-0.95827	0.83069±0.0411
3PCL	ICS/3PCL	0.00000-0.00000	0.00000±0.0000	0.03661-0.06568	0.04930±0.0067	0.00000-0.00000	0.00000±0.0000	0.00000-0.00000	0.00000±0.0000	0.00000-0.01339	0.00623±0.0045
	FMSH/3PCL	0.04447-0.05222	0.05169±0.00157	0.07870-0.10005	0.08213±0.0034	0.08503-0.10959	0.09876±0.0032	0.05715-0.08989	0.07148±0.0057	0.06970-0.09130	0.07952±0.0039
	5PW/3PCL	0.52817-0.52864	0.52842±0.0001	0.59817-0.69581	0.63799±0.018	0.55932-0.70551	0.63504±0.0208	0.60441-0.93019	0.75552±0.0578	0.44971-0.61946	0.52855±0.0283
	OCS/3PCL	0.01686-0.03332	0.02513±0.0040	0.03478-0.06267	0.04913±0.0067	0.05644-0.09215	0.07551±0.0072	0.03682-0.07469	0.05514±0.0071	0.06473-0.09181	0.07880±0.0047
	FW/3PCL	1.59409-1.59491	1.59447±0.00018	1.46326-1.72983	1.58079±0.0611	1.35374-1.76893	1.55717±0.0466	1.53371-2.33806	1.87430±0.15276	1.34514-1.91973	1.59562±0.0829
	5PL/3PCL	1.11144-1.11218	1.11181±0.0001	1.01366-1.27969	1.09774±0.0732	1.17097-1.53879	1.33901±0.0400	1.30684-1.98171	1.60454±0.1212	0.94260-1.28357	1.11865±0.0561
	3PML/3PCL	1.65266-1.65353	1.65313±0.0002	1.50190-1.70302	1.67475±0.0190	1.50304-1.94349	1.71613±0.0536	1.34471-2.06625	1.67061±0.1332	1.40909-1.92476	1.65304±0.0853
	PD/3PCL	1.20337-1.20407	1.23037±0.0001	1.09526-1.64114	1.33320±0.2661	1.25988-1.66927	1.43299±0.0490	1.34603-1.97031	1.63091±0.1205	0.90655-1.27157	1.08253±0.0584
	DL/3PCL	1.37564-1.37635	1.37600±0.0002	1.31548-1.54501	1.35121±0.0312	1.24085-1.65146	1.42182±0.0447	1.19527-1.74929	1.44829±0.1070	1.15129-1.61077	1.37139±0.0688
5PL	ICS/5PL	0.00000-0.00000	0.00000±0.0000	0.03195-0.05754	0.04497±0.0057	0.00000-0.00000	0.00000±0.0000	0.00000-0.00000	0.00000±0.0000	0.00000-0.01181	0.00557±0.0040
	FMSH/5PL	0.04000-0.04697	0.04649±0.0014	0.07230-0.08517	0.07497±0.0027	0.06246-0.08047	0.07379±0.0024	0.03545-0.05632	0.04467±0.0035	0.05914-0.08390	0.07120±0.0040
	3PCL/5PL	0.89913-0.89974	0.89943±0.0001	0.78144-0.98652	0.91507±0.0618	0.64986-0.85399	0.74747±0.0219	0.50461-0.76520	0.62679±0.0476	0.77908-1.06089	0.89622±0.0462
	OCS/5PL	0.01516-0.02998	0.02260±0.00354	0.03227-0.05646	0.04479±0.0056	0.04294-0.06903	0.05642±0.0055	0.02561-0.04526	0.03444±0.0042	0.06029-0.08443	0.07051±0.0039
	PD/5PL	1.08233-1.08294	1.08264±0.0001	0.94691-1.61860	1.23739±0.3289	0.95944-1.16158	1.07045±0.0296	0.84610-1.25871	1.01969±0.0804	0.81255-1.12652	0.96887±0.0513
5PW	ICS/5PW	0.00000-0.00000	0.00000-0.0000	0.05623-0.10060	0.07723±0.0098	0.00000-0.00000	0.00000±0.0000	0.00000-0.00000	0.00000±0.0000	0.00000-0.02446	0.01176±0.0084
	FMSH/5PW	0.08416-0.09882	0.09782±0.0030	0.12715-0.15596	0.12872±0.0037	0.13369-0.17562	0.15560±0.0050	0.07613-0.11583	0.09488±0.0075	0.13028-0.17751	0.15069±0.0079
	3PCL/5PW	1.89164-1.89244	1.89244±0.0004	1.43718-1.67176	1.56865±0.0440	1.41742-1.78788	1.57641±0.0522	1.07505-1.65450	1.33127±0.1014	1.61432-2.22364	1.89742±0.1031
	OCS/5PW	0.031890-0.06308	0.04756±0.0075	0.05619-0.09603	0.07696±0.0098	0.08956-0.15426	0.11896±0.0113	0.05418-0.09775	0.07319±0.0095	0.12185-0.17815	0.14930±0.0088
	FW/5PW	3.01611-3.01865	3.01743±0.0006	2.24935-2.61984	2.47717±0.0375	2.14855-2.83713	2.45350±0.0769	2.00673-3.05330	2.48668±0.1845	2.56488-3.61386	3.02388±0.1706
DL	ICS/DL	0.00000-0.00000	0.00000±0.0000	0.02622-0.04946	0.03654±0.0053	0.00000-0.00000	0.00000±0.0000	0.00000-0.00000	0.00000±0.0000	0.00000-0.00935	0.00454±0.0033
	FMSH/DL	0.03232-0.03795	0.03756±0.0011	0.05735-0.06740	0.06081±0.0029	0.06053-0.07846	0.06949±0.0021	0.03972-0.06191	0.04948±0.0039	0.04930-0.06720	0.05807±0.0031
	5PW/DL	0.38386-0.38419	0.38402±7.5×10-5	0.40812-0.49180	0.47256±0.0208	0.40216-0.50060	0.44678±0.0121	0.41415-0.64422	0.52308±0.0398	0.32209-0.45979	0.38586±0.0200
	OCS/DL	0.01225-0.02422	0.01826±0.0030	0.02534-0.04721	0.03641±0.052	0.04047-0.06932	0.05314±0.0051	0.02862-0.05281	0.03817±0.0050	0.04693-0.06856	0.05753±0.0034
	PD/DL	0.87456-0.87497	0.87477±8.8×10-5	0.82484-1.19583	0.98413±0.1819	0.90749-1.17990	1.00821±0.0304	1.12579-1.12641	1.12610±0.0001	0.67744-0.94194	0.79031±0.0417
	3PML/DL	1.20115-1.20164	1.20140±0.0001	1.01644-1.26318	1.24015±0.0332	1.08115-1.39136	1.20763±0.0392	1.03301-1.61036	1.29735±0.1013	1.04355-1.39207	1.20675±0.0598
PD	ICS/PD	0.00000-0.00000	0.00000±0.0000	0.02251-0.05994	0.03881±0.0106	0.00000-0.00000	0.00000±0.0000	0.00000-0.00000	0.00000±0.0000	0.00000-0.01241	0.00577±0.0042
	OCS/PD	0.01401-0.02769	0.02088±0.0033	0.02119-0.05724	0.03870±0.0105	0.04178-0.06560	0.05272±0.0050	0.02541-0.04690	0.03390±0.0044	0.05944-0.08561	0.07287±0.0038
	DL/PD	1.14290-1.14344	1.14315±0.0001	0.83624-1.21236	1.05003±0.1841	0.84753-1.10194	0.99272±0.0288	0.88778-0.88827	0.88802±0.0001	1.06164-1.47614	1.26883±0.0669
	FMSH/PD	0.03695-0.04338	0.04294±0.0013	0.04796-0.07809	0.06437±0.0140	0.05849-0.07767	0.06896±0.0022	0.03427-0.05498	0.04394±0.0035	0.06480-0.08727	0.07356±0.0034
	5PL/PD	0.92341-0.92393	0.92367±0.0001	0.61782-1.05606	0.86587±0.2139	0.86090-1.04227	0.93493±0.02704	0.79447-1.18190	0.98670±0.0768	0.88769-1.23069	1.03496±0.0539
	3PML/PD	1.37308-1.37363	1.37338±0.0001	1.02285-1.53090	1.30516±0.2472	1.07498-1.38089	1.19824±0.03620	0.81544-1.26939	1.02729±0.0838	1.30472-1.75274	1.52905±0.0756
	DFLS/PD	0.14576-0.14607	0.14592±8.0×10-5	0.12029-0.18221	0.14740±0.0233	0.11870-0.15410	0.13280±0.0040	0.10692-0.16458	0.13245±0.0105	0.14919-0.19764	0.17700±0.0080
	5PW/PD	0.43882-0.43919	0.43900±8.8×10-5	0.37707-0.05961	0.49969±0.1065	0.38060-0.51202	0.44342±0.01481	0.36778-0.57194	0.46451±0.0354	0.42565-0.56447	0.48889±0.0247
PL	ICS/PL	0.00000-0.00000	0.00000±0.0000	0.01174-0.02536	0.01804±0.0031	0.00000-0.00000	0.00000±0.0000	0.00000-0.00000	0.00000±0.0000	0.00000-0.00481	0.00224±0.0016
	FMSH/PL	0.01547-0.01817	0.01798±0.0006	0.02699-0.0325	0.02998±0.0026	0.02838-0.03495	0.03168±0.0009	0.01633-0.02487	0.02034±0.0015	0.02455-0.03428	0.02868±0.0015
	3PCL/PL	0.34780-0.34797	0.34789±3.5×10-5	0.29207-0.38622	0.36473±0.0238	0.28231-0.36627	0.32097±0.0094	0.22634-0.34756	0.28560±0.0223	0.31493-0.41783	0.36096±0.0179
	5PL/PL	0.38670-0.38686	0.38678±3.4×10-5	0.33120-0.44672	0.40161±0.0486	0.38539-0.49412	0.42959±0.0126	0.37044-0.56984	0.45689±0.0348	0.35121-0.47877	0.40334±0.0213
	OCS/PL	0.00586-0.01159	0.00874±0.0014	0.01192-0.02421	0.01797±0.0031	0.01841-0.02950	0.02423±0.0023	0.01505-0.02172	0.01570±0.0020	0.02392-0.03401	0.02840±0.0016
	PD/PL	0.41866-0.41884	0.41875±3.4×10-5	0.36197-0.56269	0.48088±0.0705	0.39495-0.52516	0.45969±0.0139	0.37008-0.57648	0.46451±0.0359	0.32664-0.44192	0.39017±0.0189
ML	ICS/ML	0.00000-0.00000	0.00000±0.0000	0.02176-0.04229	0.03058±0.0049	0.00000-0.00000	0.00000±0.0000	0.00000-0.00000	0.00000±0.0000	0.00000-0.00892	0.00429±0.0031
	FMSH/ML	0.02727-0.03202	0.03169±0.0010	0.04637-0.05926	0.05087±0.0038	0.05021-0.06344	0.05852±0.0017	0.02995-0.04569	0.03733±0.0028	0.04888-0.06421	0.05513±0.0028
	3PCL/ML	0.61297-0.61329	0.61313±6.4×10-5	0.55483-0.64409	0.61882±0.0274	0.51762-0.67143	0.59291±0.0179	0.41864-0.64646	0.52403±0.0411	0.58985-0.80979	0.69392±0.0397
	5PL/ML	0.68152-0.68185	0.68168±6.5×10-5	0.59739-0.74544	0.68101±0.0721	0.70044-0.89600	0.79353±0.0230	0.67985-1.02975	0.83820±0.0626	0.64577-0.86793	0.77545±0.0397
	OCS/ML	0.01034-0.02043	0.01541±0.0024	0.02049-0.02375	0.03047±0.0048	0.03470-0.05642	0.04475±0.0043	0.02035-0.03923	0.02880±0.0037	0.04372-0.06371	0.00429±0.0031
PW	ICS/PW	0.00000-0.00000	0.00000±0.0000	0.04507-0.09527	0.06672±0.0124	0.00000-0.00000	0.00000±0.0000	0.00000-0.00000	0.00000±0.0000	0.00000-0.01920	0.00936±0.0067
	FMSH/PW	0.05481-0.06435	0.06370±0.0019	0.09602-0.13072	0.11088±0.0126	0.10317-0.12949	0.11876±0.0039	0.05986-0.09177	0.07552±0.0059	0.10300-0.13789	0.11955±0.0062
	3PCL/PW	1.23194-1.23283	1.23237±0.0002	1.21973-1.45168	1.34705±0.1130	1.05588-1.37018	1.20298±0.0352	0.85756-1.31043	1.05986±0.0823	1.29334-1.80448	1.50503±0.0773
	5PL/PW	1.36967-1.37068	1.37017±0.0002	1.23676-1.67912	1.48623±0.2154	1.45225-1.85647	1.61000±0.0427	1.36409-2.11940	1.69554±0.1301	1.44951-1.91280	1.68148±0.0858
	OCS/PW	0.02078-0.04107	0.03097±0.0049	0.04243-0.09527	0.06672±0.0124	0.06812-0.11620	0.09082±0.0089	0.04305-0.07602	0.05827±0.0076	0.09598-0.13538	0.11840±0.0063
IPS	ICS/IPS	0.00000-0.00000	0.00000±0.0000	0.23925-0.84416	0.46836±0.1246	0.00000-0.00000	0.00000±0.0000	0.00000-0.00000	0.00000±0.0000	0.00000-0.24638	0.07687±0.0632
	FW/IPS	24.95222-37.23770	30.62441±2.6317	9.46842-24.39610	15.06104±3.7069	8.28918-18.82843	11.99696±2.33788	19.74742-28.08824	20.95365±2.1068	11.19689-35.38130	19.17508±5.4201
	OCS/IPS	0.29814-0.71200	0.48184±0.08212	0.24731-0.84416	0.46724±0.1272	0.35533-0.91379	0.58159±0.1237	0.54268-1.03676	0.77434±0.10282	0.59544-1.56618	0.94578±0.2641
	5PW/IPS	8.26794-12.34430	10.14920±0.8723	3.78158-9.74026	6.08284±1.5040	3.38631-7.82323	4.89372±0.9634	7.66169-13.5725	10.62858±1.0806	3.59250-10.89928	6.35491±1.8110
	3PML/IPS	25.87081-38.60656	31.75109±2.7287	9.71316-25.42574	15.97677±3.9514	9.15673-20.60101	13.21439±2.53783	17.65990-28.68000	23.50535±2.4543	11.07250-36.44604	19.89147±5.7488
	FMSH/IPS	0.74390-1.21311	0.99282±0.0909	0.48684-1.27108	0.78298±0.1957	0.50952-1.17857	0.76072±0.1474	0.72637-1.27857	1.00574±0.10677	0.55353-1.72662	0.95549±0.2685
	5PL/IPS	17.39713-25.96721	21.35418±1.8351	6.70000-17.26623	10.45146±2.6236	7.10817-16.42424	10.31598±2.0035	17.10363-28.71014	22.57184±2.2839	8.11917-24.66906	13.42613±3.7808
	3PCL/IPS	15.65072-23.35246	19.20668±1.6506	5.79211-15.14852	9.54337±2.3750	5.32450-11.84821	7.70879±1.5039	10.20398-18.20714	14.11275±1.4644	7.38005-20.58993	12.03189±3.4163
OPS	ICS/OPS	0.00000-0.00000	0.00000±0.0000	0.35798-2.45652	0.93018±0.4706	0.00000-0.00000	0.00000±0.0000	0.00000-0.00000	0.00000±0.0000	0.00000-1.40000	0.18473±0.2372
	PW/OPS	32.53426-92.04000	52.74473±15.3628	5.86142-48.18421	14.30499±7.5744	6.75758-39.86792	12.67757±5.3473	17.26496-37.96875	25.12626±4.5853	7.17355-120.06667	20.49197±18.9411
	FMSH/OPS	1.81818-5.92000	3.35712±0.9722	0.71161-5.47368	1.56133±0.8071	0.79856-4.54717	1.50164±0.6185	1.29204-2.79688	1.89075±0.3396	0.81887-14.46667	2.44357±2.24899
	5PW/OPS	21.19178-59.92000	34.34780±10.0038	5.55056-39.89474	12.12754±6.2440	5.17845-31.60377	9.68244±4.1185	13.59829-30.38710	19.97290±3.4866	5.78491-96.46667	16.22925±14.9630
	3PML/OPS	66.28767-187.48000	107.45494±31.2960	14.26217-95.44737	31.85531±16.30529	13.74194-85.16981	26.16561±11.1093	28.35000-68.51613	44.16622±7.80045	18.12810-291.13333	50.56801±46.0291
	DFLS/OPS	7.04110-19.92000	11.41712±3.3255	1.55431-13.0000	3.63522±1.9000	1.55219-9.1000	2.89467±1.20583	3.87180-8.43548	5.70006±1.0296	2.04528-34.33333	5.91274±5.4731
	5PL/OPS	44.57534-126.12000	72.26889±21.0487	9.83895-74.13158	20.83207±10.8259	10.86869-64.18868	20.38563±8.5396	29.00833-62.22222	42.42673±7.4358	11.77736-201.60000	34.51482±32.0830
	3PCL/OPS	40.09589-113.44000	65.00120-18.9324	8.50562-61.57895	19.03652±9.7980	7.99642-47.38000	15.24341±6.4405	18.13675-39.67742	26.52973±4.7100	10.52076-183.13333	30.81998±28.6444
	OCS/OPS	0.78462-3.40000	1.63178±0.5423	0.35497-2.92105	0.93334±0.4998	0.50000-4.08000	1.15066±0.49942	0.90000-2.29825	1.45335±0.2727	0.85246-14.73333	2.42353±2.24673
	FW/OPS	63.93151-180.84000	103.64212±30.1864	13.90262-93.76316	30.01455±15.3870	12.65926-76.28302	23.71357±9.9594	32.67500-75.66129	1.89075±8.7119	17.10566-288.33333	49.09419±45.3584
	DL/OPS	55.16438-156.08000	89.44174±26.05073	11.29214-84.50000	25.75031±13.3020	11.60943-67.74000	21.65753±9.0830	25.03390-57.74603	38.30411±6.7443	14.74793-248.13333	42.17650±38.9509
	PD/OPS	48.26027-135.52000	78.24127±22.78895	9.31835-82.96721	25.65247±14.5784	11.60943-64.62000	21.81095±9.0543	28.18644-65.01587	43.13404±7.5945	11.35849-194.66667	33.28009±30.4941
	IPS/OPS	1.95313-6.41667	3.40245±1.0186	0.68444-6.69565	2.07375±1.06203	0.74725-7.58491	2.04862±0.9506	1.25000-2.94915	1.89009±0.3376	0.64789-16.60000	2.78909±2.66409
	CL/OPS	101.53425-287.24000	164.61247±47.9441	23.72659-171.44737	50.99500±25.3156	21.38047-135.00000	40.45950±16.9993	57.67257-122.07937	83.15269±14.3098	28.11157-465.00000	77.84301±71.3366
	PWC/OPS	43.80822-123.92000	71.02153±20.68495	10.83521-79.02632	24.05988±12.3759	11.51852-69.16000	21.66559±9.0331	27.30508-60.55556	39.41167±7.0950	11.20000-194.80000	33.51415±30.7232
	CW/OPS	146.75758-402.70833	230.98696±67.1232	36.83588-250.39474	79.89974±40.9105	34.60932-199.78000	65.04595±26.9852	94.65714-172.47368	125.42112±19.6813	40.83884-659.06667	113.02061±102.8712
OCS	ICS/OCS	0.00000-0.00000	0.00000±0.0000	0.68462-1.43878	1.01835±0.17357	0.00000-0.00000	0.00000±0.0000	0.00000-0.00000	0.00000±0.0000	0.00000-0.17241	0.07917±0.05703
	3PCL/OCS	30.00917-59.31250	40.81111±6.5941	15.94928-28.75229	20.73680±2.8543	10.85185-17.71739	13.36703±1.31233	13.38961-27.15790	18.43959±2.37099	10.89243-15.44828	12.73553±0.7745
	5PW/OCS	15.85321-31.35417	21.56546±3.4849	10.41304-17.79817	13.21014±1.7113	6.48261-11.16547	8.48271±0.8159	10.23026-18.45714	13.89280±1.8034	5.61328-8.20690	6.72126±0.3957
	FMSH/OCS	1.51250-3.08333	2.10954±0.3477	1.33803-2.26605	1.69987±0.2208	1.04054-1.65734	1.31895±0.1240	0.93590-1.88421	1.31385±0.16960	0.89516-1.17371	1.01124±0.0556
	PWC/OCS	32.77982-64.81250	44.59126±7.2053	20.31884-35.97248	26.21199±3.5132	14.84956-24.01439	19.01023±1.8043	19.66667-37.70297	27.38550±3.51392	12.39574-16.46948	13.83869±0.7285
	FW/OCS	47.84404-94.58333	65.07215±10.5147	26.07246-43.78723	32.71041±4.1699	16.65652-27.12143	20.80673±2.0541	24.93548-48.47368	34.45044±4.4895	17.43028-25.13301	20.29165±1.1939
ICS	OCS/ICS			0.69504-1.46067	1.01114±0.1750					0.00000-1.00000	0.71324±0.4539
	CW/ICS			70.92754-109.82023	86.71109±10.2865					0.00000-791.23077	298.90844±220.0616
	3PCL/ICS			15.22517-27.31818	20.65817±2.8097					0.00000-240.92857	96.37134±71.0273
	PWC/ICS			19.40397-33.93478	26.11826±3.5071					0.00000-584.76923	218.77197±160.8455
	CL/ICS			42.47682-73.96591	55.34149±7.0876					0.00000-393.07692	137.70379±101.7322
	DFMS/ICS			3.45695-5.78261	4.48695±0.5688					0.00000-464.76923	169.52175±124.9480
	PW/ICS			10.49669-22.18750	15.51435±2.8777					0.00000-23.53333	7.59502±6.05325
	PL/ICS			39.43709-44.41964	57.07561±9.8221					0.00000-346.61538	124.90626±91.8741
	SW/ICS			32.32450-55.86607	43.32228±5.6979					0.00000-200.62500	81.07573±59.53336
