# Supplementary material for: Morphological descriptions and morphometric discriminant function analysis reveal an additional four groups of Scylla spp
Source: PeerJ. 2020 Jan 3;8:e8066. doi: 10.7717/peerj.8066 (PMC6944125; doi:10.7717/peerj.8066)
Supplement: Table S3 [file peerj-08-8066-s003.xlsx]

## Sheet: S3
Supplementary Table S3: The range and average values of the least needed ratios for each divisor (morphological character) to achieve a discriminant of 100% in females.
		S. olivacea (n = 300)		S. tranquebarica (n = 300)		S. paramamosain (n = 300)		SH 1 (n = 111)
Divisor	Ratio	Range	Mean ± sd	Range	Mean ± sd	Range	Mean ± sd	Range	Mean ± sd
CW	ICS/CW	0.00000-0.00000	0.00000±0.0000	0.01223-0.02487	0.01788±0.0030	0.00000-0.00000	0.00000±0.0000	0.00000-0.00000	0.00000±0.0000
	FMSH/CW	0.01273-0.01863	0.01531±0.0010	0.02067-0.02539	0.02282±0.0012	0.01497-0.03871	0.02227±0.0035	0.01353-0.01632	0.01506±0.0006
	5PL/CW	0.27756-0.41853	0.34188±0.0221	0.28259-0.33532	0.31312±0.01200	0.24142-0.47483	0.31374±0.0357	0.30907-0.36623	0.33989±0.0128
	OPS/CW	0.00347-0.00387	0.00367±0.0001	0.01960-0.03394	0.02607±0.0038	0.00691-0.03728	0.02096±0.0077	0.01514-0.03107	0.02312±0.0039
	3PCL/CW	0.17523-0.25925	0.21316±0.0139	0.20634-0.31160	0.24659±0.0230	0.14552-0.33267	0.26128±0.0459	0.18939-0.22421	0.21113±0.0073
	IPS/CW	0.01376-0.01418	0.01398±0.0001	0.02185-0.03652	0.02829±0.0037	0.02429-0.21768	0.09091±0.0697	0.02187-0.03963	0.02995±0.0052
ICW	ICS/ICW	0.00000-0.00000	0.00000±0.0000	0.01297-0.02633	0.01902±0.0031	0.00000-0.00000	0.00000±0.0000	0.00000-0.00000	0.00000±0.0000
	FMSH/ICW	0.01395-0.01974	0.01630±0.0011	0.02166-0.02741	0.02428±0.0012	0.01606-0.04178	0.02410±0.0037	0.01447-0.01745	0.01594±0.0006
	OPS/ICW	0.00576-0.00896	0.00730±0.0005	0.03753-0.06756	0.05128±0.0076	0.00734-0.04040	0.02269±0.0083	0.03094-0.06909	0.04765±0.0096
	3PCL/ICW	0.18737-0.27783	0.22698±0.0149	0.21797-0.32849	0.26232±0.0237	0.15596-0.36480	0.28344±0.0521	0.20236-0.23770	0.22346±0.0077
	5PL/ICW	0.29639-0.44353	0.36405±0.0237	0.29687-0.36412	0.33321±0.0139	0.25702-0.50188	0.33961±0.0369	0.33024-0.38166	0.35972±0.0126
	IPS/ICW	0.01437-0.01554	0.01489±0.0002	0.02340-0.03839	0.03010±0.0040	0.02734-0.23211	0.09760±0.0739	0.02286-0.04141	0.03170±0.0055
	OCS/ICW	0.00839-0.01331	0.01079±0.0013	0.02217-0.03377	0.02763±0.0031	0.00734-0.04040	0.02269±0.0083	0.01661-0.03237	0.02446±0.0041
	CL/ICW	0.58351-0.84704	0.71306±0.0457	0.61987-0.74642	0.66851±0.0289	0.54811-1.01963	0.70734±0.0776	0.63942-0.75937	0.70214±0.0257
	AW/ICW	0.38235-0.55666	0.46415±0.0303	0.36162-0.49533	0.44340±0.0372	0.36754-0.70075	0.46730±0.0543	0.41787-0.49514	0.45930±0.0163
	CW/ICW	1.03923-1.10361	1.06492±0.0152	1.0418-1.0973	1.0641±0.0115	1.03956-1.19532	1.08317±0.0245	1.03880-1.08874	1.05852±0.0141
	8CW/ICW	1.03080-1.11817	1.06877±0.0166	1.02549-1.07546	1.04753±0.0109	1.02355-1.18320	1.06788±0.0262	1.03907-1.10265	1.06524±0.0157
	PWC/ICW	0.28274-0.40421	0.33791±0.0217	0.32535-0.38662	0.35361±0.0137	0.30694-1.02650	0.48685±0.1972	0.29909-0.36200	0.33240±0.0130
8CW	ICS/8CW	0.00000-0.00000	0.00000±0.0000	0.01238-0.02522	0.01816±0.0030	0.00000-0.00000	0.00000±0.0000	0.00000-0.00000	0.00000±0.0000
	OPS/8CW	0.00344-0.00388	0.00366±0.001	0.02001-0.03440	0.02648±0.0038	0.00698-0.03794	0.02127±0.0078	0.01516-0.03092	0.02376±0.0046
	3PCL/8CW	0.17446-0.25793	0.21241±0.0141	0.20911-0.31579	0.25048±0.0233	0.14651-0.33637	0.26504±0.0466	0.18985-0.22245	0.20980±0.0074
	IPS/8CW	0.01358-0.01426	0.01393±0.0001	0.02218-0.03706	0.02873±0.0038	0.02450-0.22050	0.09228±0.0708	0.02186-0.03931	0.02976±0.0052
	5PL/8CW	0.27977-0.41749	0.34065±0.0219	0.28703-0.34235	0.31808±0.0125	0.24322-0.48341	0.31832±0.0370	0.30761-0.36455	0.33776±0.0129
PWC	ICS/PWC	0.00000-0.00000	0.00000±0.0000	0.03664-0.07816	0.05387±0.0091	0.00000-0.00000	0.00000±0.0000	0.00000-0.00000	0.00000±0.0000
	OPS/PWC	0.00928-0.01392	0.01161±0.0008	0.05643-0.10774	0.07856±0.0118	0.00925-0.11945	0.05341±0.0267	0.04966-0.11048	0.07628±0.0153
	5PL/PWC	0.86098-1.33871	1.08021±0.0792	0.83588-1.04469	0.94338±0.0470	0.44162-1.06901	0.78182±0.2246	0.94369-1.23306	1.08357±0.0519
	FMSH/PWC	0.03843-0.05993	0.04839±0.00384	0.06091-0.08072	0.0677±0.0045	0.02574-0.07443	0.05513±0.0154	0.04231-0.05489	0.04802±0.0023
CL	ICS/CL	0.00000-0.00000	0.00000±0.0000	0.02051-0.03802	0.02844±0.0044	0.00000-0.00000	0.00000±0.0000	0.00000-0.00000	0.00000±0.0000
	FMSH/CL	0.01805-0.02861	0.02293±0.0018	0.03093-0.03839	0.03633±0.0013	0.02689-0.04521	0.03404±0.0031	0.02056-0.02500	0.02273±0.0010
	OPS/CL	0.00450-0.00701	0.00550±0.0004	0.02852-0.05526	0.04156±0.0062	0.00898-0.06055	0.03242±0.0123	0.02198-0.05020	0.03607±0.0070
	3PCL/CL	0.24755-0.40646	0.31939±0.0266	0.30602-0.49502	0.39341±0.0413	0.27090-0.52356	0.40322±0.0777	0.28011-0.35937	0.31854±0.0132
	IPS/CL	0.01728-0.02522	0.02096±0.00132	0.03244-0.05776	0.04508±0.0060	0.03913-0.38516	0.13773±0.1056	0.03263-0.06046	0.04523±0.0081
FW	ICS/FW	0.00000-0.00000	0.00000±0.0000	0.03125-0.06996	0.04697±0.0084	0.00000-0.00000	0.00000±0.0000	0.00000-0.00000	0.00000±0.0000
	FMSH/FW	0.02948-0.04901	0.03838±0.0033	0.05321-0.07198	0.05992±0.0046	0.04929-0.08594	0.06087±0.0082	0.03478-0.04318	0.03819±0.0016
	3PCL/FW	0.41437-0.69268	0.53422±0.0439	0.54585-0.84041	0.64651±0.0605	0.50166-0.89943	0.71066±0.0978	0.49153-0.59507	0.53529±0.0224
	OPS/FW	0.00757-0.01126	0.00921±0.0007	0.04974-0.09735	0.06839±0.0102	0.01784-0.20253	0.08184±0.0407	0.03915-0.08349	0.06061±0.0119
	CL/FW	1.34515-2.08624	1.67738±0.1239	1.44697-2.00207	1.64977±0.1172	1.46928-2.16501	1.78699±0.1496	1.50829-1.84870	1.68195±0.0730
	IPS/FW	0.02932-0.04238	0.03508±0.0024	0.05508-0.10149	0.07425±0.0105	0.06663-0.76506	0.25832±0.2130	0.05375-0.09995	0.07601±0.0137
FMSH	ICS/FMSH	0.00000-0.00000	0.00000±0.0000	0.54762-1.12376	0.78372±0.1243	0.00000-0.00000	0.00000±0.0000	0.00000-0.00000	0.00000±0.0000
	5PL/FMSH	17.64324-28.04861	22.40093±1.7385	11.38521-15.33168	13.76450±0.9575	10.60133-19.05172	14.21675±1.2557	20.00000-25.09524	22.58784±1.013
	OPS/FMSH	0.19251-0.30345	0.24082±0.0174	0.80083-1.54271	1.14505±0.1729	0.34579-3.33908	1.32492±0.6037	1.02069-2.21918	1.58925±0.3145
	PWC/FMSH	16.68649-26.02013	20.79576±1.6412	12.38889-16.41709	14.60196±0.9196	13.43621-38.85632	20.10759±7.1702	18.21687-23.63699	20.87149±0.9776
DFLS	ICS/DFLS	0.00000-0.00000	0.00000±0.0000	0.24352-0.58750	0.37679±0.0748	0.00000-0.00000	0.00000±0.0000	0.00000-0.00000	0.00000±0.0000
	FMSH/DFLS	0.26364-0.41667	0.33436±0.0262	0.40310-0.65067	0.48047±0.0538	0.34455-0.68305	0.48360±0.0495	0.30328-0.37012	0.33434±0.0148
	CL/DFLS	12.07421-18.68493	14.62564±1.1236	10.98596-17.46134	13.23418±1.4612	11.83585-16.48276	14.21870±0.9090	13.25567-16.05727	14.72247±0.5850
	OPS/DFLS	0.06545-0.09795	0.08025±0.0054	0.36732-0.83756	0.54887±0.0958	0.14859-1.41309	0.63465±0.2742	0.33637-0.76267	0.53105±0.1062
	3PCL/DFLS	3.70932-5.91441	4.65683±0.3760	3.95220-6.92290	5.18823±0.6706	3.50877-7.50794	5.73614±1.1624	4.24742-5.14024	4.68605±0.1933
	IPS/DFLS	0.25455-0.36902	0.30573±0.0196	0.41017-0.88714	0.59568±0.0979	0.57143-5.66591	1.94360±1.4758	0.46220-0.91591	0.66630±0.1253
DFMS	ICS/DFMS	0.00000-0.00000	0.00000±0.0000	0.21779-0.53499	0.35567±0.0635	0.00000-0.00000	0.00000±0.0000	0.00000-0.00000	0.00000±0.0000
	OPS/DFMS	0.06705-0.10185	0.08174±0.0057	0.35320-0.76027	0.51928±0.0875	0.14969-1.42444	0.58824±0.2509	0.33790-0.75000	0.54054±0.1066
	FMSH/DFMS	0.26277-0.41463	0.34057±0.02745	0.38226-0.56782	0.45417±0.0411	0.31183-0.63368	0.44961±0.0446	0.31056-0.38084	0.34047±0.0145
	5PL/DFMS	5.98704-9.66511	7.60471±0.5883	5.05729-7.42616	6.23205±0.5129	5.28571-7.46237	6.34943±0.4158	6.88454-8.42166	7.68324±0.3397
	OCS/DFMS	0.16201-0.30454	0.22559±0.0301	0.36767-0.71801	0.51729±0.0721	0.11986-0.81104	0.42880±0.16402	0.35045-0.72104	0.52273±0.0903
	3PCL/DFMS	3.76427-6.10956	4.74323±0.3932	3.73779-6.63801	4.91283±0.6266	3.16028-7.17888	5.35137±1.1541	4.18220-5.24638	4.77341±0.2208
	IPS/DFMS	0.25967-0.36806	0.31139±0.0205	0.38558-0.78670	0.56313±0.0861	0.53975-5.19178	1.78755±1.3376	0.46285-0.92857	0.67750±0.1209
SW	ICS/SW	0.00000-0.00000	0.00000±0.0000	0.02451-0.04917	0.03517±0.0059	0.00000-0.00000	0.00000±0.0000	0.00000-0.00000	0.00000±0.0000
	FMSH/SW	0.02422-0.03884	0.03042±0.0025	0.03948-0.05073	0.04487±0.0024	0.03511-0.05972	0.04370±0.0042	0.02742-0.03398	0.02999±0.0014
	OPS/SW	0.00576-0.00896	0.00730±0.0005	0.03753-0.06756	0.05128±0.0076	0.01244-0.07632	0.04160±0.0156	0.03094-0.06909	0.04765±0.0096
	3PCL/SW	0.33139-0.53511	0.42353±0.0346	0.38816-0.62359	0.48501±0.0472	0.34572-0.66159	0.51641±0.0949	0.37087-0.46993	0.42049±0.0191
	IPS/SW	0.02271-0.03333	0.02781±0.0019	0.04177-0.07273	0.05563±0.0074	0.05019-0.49928	0.17838±0.1385	0.04103-0.07994	0.05969±0.0107
	5PL/SW	0.53946-0.83188	0.67918±0.0539	0.53502-0.68693	0.61584±0.0283	0.53094-0.69953	0.61692±0.0295	0.59799-0.76529	0.67700±0.0333
AW	ICS/AW	0.00000-0.00000	0.00000±0.0000	0.02847-0.06986	0.04344±0.0094	0.00000-0.00000	0.00000±0.0000	0.00000-0.00000	0.00000±0.0000
	FMSH/AW	0.02731-0.04457	0.03525±0.0031	0.04785-0.07295	0.05536±0.0076	0.03780-0.06767	0.05156±0.0047	0.03208-0.03964	0.03474±0.0015
	CL/AW	1.20000-1.90326	1.54118±0.1220	1.30875-1.99826	1.52392±0.1996	1.34177-1.75678	1.51610±0.0720	1.36685-1.67540	1.52984±0.0601
	OPS/AW	0.00678-0.01050	0.00846±0.0006	0.04358-0.09644	0.06311±0.0113	0.01584-0.14841	0.06748±0.0285	0.03361-0.07879	0.05520±0.0111
	3PCL/AW	0.38871-0.62393	0.49073±0.0413	0.49942-0.75567	0.59438±0.0600	0.38751-0.79337	0.61323±0.1292	0.43199-0.54036	0.48703±0.0222
	IPS/AW	0.02637-0.03867	0.03221±0.0021	0.04842-0.10034	0.06846±0.0115	0.06214-0.55634	0.20540±0.1532	0.04699-0.09261	0.06920±0.0127
3PML	ICS/3PML	0.00000-0.00000	0.00000±0.0000	0.03137-0.07357	0.04704±0.0089	0.00000-0.00000	0.00000±0.0000	0.00000-0.00000	0.00000±0.0000
	FMSH/3PML	0.03467-0.05508	0.04350±0.0034	0.05194-0.07475	0.06002±0.0060	0.04979-0.09256	0.06207±0.0102	0.03804-0.04756	0.04281±0.0019
	5PL/3PML	0.78030-1.21471	0.97162±0.0756	0.72811-0.95516	0.82138±0.0450	0.70308-1.11778	0.87466±0.1062	0.88367-1.05830	0.96586±0.0407
	OPS/3PML	0.00835-0.01299	0.01044±0.0008	0.04974-0.09877	0.06846±0.0108	0.01733-0.20298	0.08452±0.0449	0.04264-0.09640	0.06801±0.0136
	3PCL/3PML	0.46753-0.77614	0.60606±0.0503	0.55525-0.83394	0.64603±0.0564	0.55417-0.86483	0.71854±0.0741	0.54459-0.65626	0.59999±0.0248
	IPS/3PML	0.03214-0.04879	0.03979±0.0027	0.05479-0.10685	0.07432±0.0112	0.06572-0.79288	0.27090±0.2324	0.06061-0.11557	0.08520±0.0154
3PCL	ICS/3PCL	0.00000-0.00000	0.00000±0.0000	0.04410-0.11149	0.07312±0.0140	0.00000-0.00000	0.00000±0.0000	0.00000-0.00000	0.00000±0.0000
	FW/3PCL	1.44368-2.41330	1.88434±0.1535	1.18990-1.83201	1.55919±0.1342	1.11181-1.99338	1.43631±0.2139	1.68048-2.03445	1.87139±0.0777
	OPS/3PCL	0.01374-0.02118	0.01729±0.0012	0.06801-0.16451	0.10653±0.0180	0.02394-0.33926	0.12379±0.0762	0.06991-0.16330	0.11346±0.0229
	IPS/3PCL	0.05424-0.08030	0.06588±0.0044	0.07279-0.16532	0.11563±0.0182	0.08566-1.36011	0.41076±0.3823	0.09995-0.19018	0.14210±0.0255
	PW/3PCL	0.62316-0.99557	0.77757±0.0641	0.46346-0.77897	0.59887±0.0644	0.43340-1.19217	0.62806±0.1954	0.69678-0.03466	0.77455±0.0347
5PL	ICS/5PL	0.00000-0.00000	0.00000±0.0000	0.03790-0.08404	0.05725±0.0101	0.00000-0.00000	0.00000±0.0000	0.00000-0.00000	0.00000±0.0000
	FMSH/5PL	0.03565-0.05668	0.04491±0.0035	0.06522-0.08783	0.07302±0.0054	0.05249-0.09433	0.07091±0.0066	0.03985-0.05000	0.04436±0.0020
	OPS/5PL	0.00849-0.01330	0.01078±0.0007	0.05871-0.11661	0.08343±0.0128	0.02186-0.20330	0.09328±0.0406	0.04477-0.10006	0.07051±0.0144
	3PCL/5PL	0.49572-0.76797	0.62549±0.0505	0.64087-1.04111	0.78862±0.0798	0.54208-1.09238	0.84026±0.1645	0.54156-0.68471	0.62172±0.0251
	IPS/5PL	0.03332-0.05011	0.04107±0.0027	0.06616-0.12586	0.09052±0.0128	0.08299-0.80944	0.28636±0.2185	0.05996-0.11795	0.08826±0.0157
5PW	ICS/5PW	0.00000-0.00000	0.00000±0.0000	0.07274-0.17478	00.11268±0.0212	0.00000-0.00000	0.00000-0.0000	0.00000-0.00000	0.00000±0.0000
	FMSH/5PW	0.07732-0.12151	0.09595±0.0073	0.12124-0.18473	0.14364±0.0131	0.11191-0.20997	0.14865±0.0162	0.08603-0.10571	0.09453±0.0041
	OPS/5PW	0.01876-0.02803	0.02304±0.0017	0.10933-0.23234	0.16421±0.0274	0.04695-0.45101	0.19751±0.0916	0.09397-0.21457	0.15020±0.0302
	CL/5PW	3.30927-5.34308	4.19888±0.3383	3.29990-5.06904	3.95819±0.37494	3.75405-5.13482	4.36847±0.2764	3.69810-4.78661	3.16392±0.1872
	3PCL/5PW	1.03823-1.65343	1.33674±0.1106	1.20056-2.12193	1.55436±0.20394	1.12913-2.26934	1.75093±0.3026	1.16159-1.48201	1.32531±0.0604
	IPS/5PW	0.07339-0.10282	0.08776±0.0058	0.12566-0.25513	0.17811±0.0273	0.17101-1.80836	0.61384±0.4887	0.13346-0.25100	0.18800±0.0330
DL	ICS/DL	0.00000-0.00000	0.00000±0.0000	0.03900-0.09754	0.06107±0.01249	0.00000-0.00000	0.00000±0.0000	0.00000-0.00000	0.00000±0.0000
	FMSH/DL	0.03988-0.06165	0.04967±0.0040	0.06723-0.10320	0.07786±0.0096	0.06425-0.12438	0.07773±0.0114	0.04488-0.05605	0.04974±0.0020
	CL/DL	1.72486-2.72241	2.17305±0.1725	1.83546-2.88480	2.14341±0.2511	1.88510-2.86533	2.27963±0.2027	1.95352-2.38786	2.19078±0.0901
	OCS/DL	0.02321-0.04596	0.03295±0.0047	0.06568-0.12859	0.08851±0.0131	0.02161-0.14636	0.07364±0.0279	0.05191-0.10244	0.07643±0.0135
	3PCL/DL	0.54818-0.85104	0.69179±0.0563	0.70053-1.06147	0.83703±0.0816	0.63828-1.15744	0.90650±0.1256	0.61361-0.77952	0.69737±0.0313
	OPS/DL	0.00956-0.01503	0.01193±0.0009	0.06223-0.13601	0.08873±0.0149	0.02404-0.27797	0.10452±0.0523	0.05056-0.11378	0.07899±0.0157
	IPS/DL	0.03771-0.05546	0.04543±0.0031	0.06850-0.14361	0.09638±0.0157	0.08681-1.01826	0.32994±0.2736	0.07012-0.13384	0.09904±0.0180
PD	ICS/PD	0.00000-0.00000	0.00000±0.0000	0.04956-0.13246	0.07954±0.0161	0.00000-0.00000	0.00000±0.0000	0.00000-0.00000	0.00000±0.0000
	OPS/PD	0.01255-0.01914	0.01532±0.0012	0.07849-0.17974	0.11588±0.0209	0.02314-0.16000	0.08587±0.0332	0.06385-0.13987	0.10028±0.0194
	FMSH/PD	0.05145-0.08079	0.06380±0.0050	0.08421-0.13681	0.10153±0.0129	0.06367-0.11810	0.08995±0.0087	0.05622-0.07015	0.06320±0.0025
	CL/PD	2.17368-3.42949	2.79157±0.2200	2.36574-3.75921	2.79356±0.3276	2.20717-3.00791	2.64484±0.1623	2.44990-3.06255	2.78392±0.1197
	3PCL/PD	0.69108-1.12646	0.88879±0.07734	0.90562-1.36114	1.09052±0.1012	0.65348-1.42043	1.07263±0.2398	0.76952-0.98138	0.88619±0.0411
	IPS/PD	0.04820-0.07152	0.05836±0.0041	0.08842-0.18642	0.12559±0.0203	0.10732-1.04272	0.35497±0.2627	0.09018-0.16931	0.12582±0.0228
PL	ICS/PL	0.00000-0.00000	0.00000±0.0000	0.01971-0.04847	0.03035±0.0065	0.00000-0.00000	0.00000±0.0000	0.00000-0.00000	0.00000±0.0000
	FMSH/PL	0.01975-0.03174	0.02504±0.0020	0.03276-0.05025	0.03868±0.0052	0.03001-0.05265	0.03687±0.0042	0.02223-0.02848	0.02491±0.0011
	CL/PL	0.86492-1.36353	1.09456±0.0783	0.93004-1.37001	1.06456±0.1336	0.92859-1.24097	1.08296±0.0658	0.97076-1.23651	1.09682±0.0442
	OCS/PL	0.01136-0.02294	0.01659±0.0023	0.03278-0.06295	0.04395±0.0067	0.01090-0.06823	0.03507±0.0133	0.02539-0.05155	0.03822±0.0065
	OPS/PL	0.00486-0.00748	0.00601±0.0004	0.03105-0.06622	0.04407±0.0076	0.01165-0.11822	0.04922±0.0234	0.02537-0.05578	0.03954±0.0077
	3PCL/PL	0.27281-0.42629	0.34857±0.0275	0.35348-0.52161	0.41520±0.0386	0.30714-0.55387	0.43270±0.0678	0.30698-0.39056	0.34914±0.0152
	IPS/PL	0.01889-0.02746	0.02289±0.0015	0.03448-0.07021	0.04784±0.0079	0.04174-0.43390	0.15391±0.1237	0.03546-0.06625	0.04952±0.0086
ML	ICS/ML	0.00000-0.00000	0.00000±0.0000	0.03304-0.08880	0.05144±0.0118	0.00000-0.00000	0.00000±0.0000	0.00000-0.00000	0.00000±0.0000
	OPS/ML	0.00873-0.01336	0.01080±0.0007	0.05018-0.11742	0.07465±0.0140	0.01917-0.22658	0.08800±0.0456	0.04407-0.09860	0.07098±0.0142
	5PL/ML	0.78667-1.28345	1.00494±0.0759	0.75500-1.16600	0.89433±0.0865	0.74584-1.21010	0.91524±0.1015	0.90959-1.10157	1.00813±0.0418
	FMSH/ML	0.03498-0.05712	0.0450±0.0035	0.05439-0.09121	0.06557±0.0103	0.05176-0.10296	0.06495±0.0101	0.04075-0.04990	0.04467±0.0018
	3PCL/ML	0.49105-0.75093	0.62668±0.0486	0.58304-0.89932	0.70243±0.0724	0.56328-0.92552	0.75400±0.0878	0.57713-0.68593	0.62616±0.0233
	IPS/ML	0.03409-0.04939	0.04115±0.0027	0.05789-0.12793	0.08107±0.0149	0.06960-0.83467	0.28064±0.2379	0.05978-0.12120	0.08902±0.0165
PW	ICS/PW	0.00000-0.00000	0.00000±0.0000	0.07434-0.19528	0.12284±0.0237	0.00000-0.00000	0.00000±0.0000	0.00000-0.00000	0.00000±0.0000
	OPS/PW	0.01792-0.02774	0.02232±0.0016	0.11962-0.26992	0.17896±0.0303	0.04797-0.35139	0.18495±0.0716	0.09409-0.20791	0.14649±0.0289
	FMSH/PW	0.07357-0.11416	0.09301±0.0081	0.12912-0.20497	0.15674±0.0171	0.08304-0.24389	0.14400±0.0217	0.08138-0.10443	0.09228±0.0041
	CL/PW	3.17656-5.27471	4.06660±0.3211	3.54016-5.69876	4.31508±0.4455	2.74198-5.92730	4.22874±0.4942	3.55351-4.46418	4.06406±0.1703
	3PCL/PW	1.00445-1.60473	1.29465±0.1053	1.28375-2.15770	1.68930±0.1832	0.83881-2.30732	1.71602±0.40825	1.13995-1.43517	1.29366±0.0585
	IPS/PW	0.06973-0.10292	0.08501±0.0056	0.13016-0.28784	0.19413±0.0302	0.17505-1.39845	0.55555±0.3889	0.12822-0.25047	0.18369±0.0333
IPS	ICS/IPS	0.00000-0.00000	0.00000±0.0000	0.38629-1.09009	0.64277±0.1352	0.00000-0.00000	0.00000±0.0000	0.00000-0.00000	0.00000±0.0000
	5PL/IPS	19.95679-30.01429	24.45240±1.6015	7.94540-15.11382	11.27031±1.6015	1.23543-12.04962	5.76151±3.2222	8.47804-16.67900	11.70125±2.1307
	OPS/IPS	0.24818-0.27941	0.26253±0.0074	0.59813-1.43478	0.93816±0.1867	0.13292-1.33835	0.44457±0.2404	0.46281-1.38462	0.82287±0.2182
	3PCL/IPS	12.45399-18.43662	15.24631±1.0114	6.04885-13.73810	8.87135±1.4537	0.73524-11.67442	5.30049±3.3538	5.25807-10.00467	7.27011±1.3273
	ICW/IPS	64.34483-69.58519	67.17404±1.0589	26.04899-42.73333	33.81121±4.5071	4.30829-36.56977	17.25183±9.8593	24.14729-43.74312	32.51885±5.7344
	FMSH/IPS	0.9119-1.33571	1.09477±0.0706	0.57681-1.13063	0.82041±0.1140	0.07955-0.83206	0.40509±0.2236	0.38462-0.71028	0.51898±0.0963
OPS	ICW/OPS	238.29167-274.32353	256.05589±7.6064	27.88788-47.90155	36.82012±5.3787	16.79434-127.78378	40.09600±22.5842	28.42991-63.46622	41.08030±8.2916
	ICS/OPS	0.00000-0.00000	0.00000±0.0000	0.41667-1.15610	0.69938±0.1498	0.00000-0.00000	0.00000±0.0000	0.00000-0.00000	0.00000±0.0000
	FMSH/OPS	3.29545-5.19444	4.17389±0.2998	0.64821-1.24870	0.89386±0.1380	0.29948-2.89189	0.94992±0.5115	0.45062-0.97973	0.65444±0.13136
	OCS/OPS	2.10811-3.48571	2.76195±0.3326	0.67941-1.48558	1.01674±0.1841	0.14017-5.16216	0.92737±0.7143	0.54206-1.61078	1.00237±0.2496
	IPS/OPS	3.57895-4.02941	3.81215±0.1077	0.69697-1.67188	1.10879±0.2220	0.74719-7.52330	2.94477±1.4633	0.72222-2.16017	1.30108±0.3406
	3PCL/OPS	47.20455-72.80556	58.11838±4.1535	6.07879-14.70466	9.65494±1.6273	2.94761-41.77027	11.96979±7.8690	6.12387-14.3041	9.18032±1.8726
	PWC/OPS	71.71395-107.77778	86.50776±5.8796	9.28182-17.72199	13.02158±1.9752	8.67751-48.77027	17.14605±7.0362	9.05136-20.13514	13.65403±2.7919
	5PL/OPS	75.18605-117.77143	93.19553±6.3438	8.57530-17.03292	12.27590±1.9098	4.91888-45.74324	13.47834±7.4555	9.99396-22.33784	14.78408±3.0465
	5PW/OPS	35.68182-53.31429	43.62970±3.1605	4.30395-9.14694	6.26161±1.0522	2.21725-21.55405	6.50379±3.6980	4.66049-10.64189	6.93438±1.4186
	8CW/OPS	257.71795-290.65714	273.62152±7.7478	29.06970-49.96891	38.56910±5.6396	17.56604-136.06757	42.98502±22.4853	29.96885-65.94595	43.74054±8.7288
	CW/OPS	258.20513-288.00000	272.63550±7.4996	29.46061-51.00823	39.18226±5.7506	17.86226-138.47297	43.59089±24.8308	29.70717-66.06081	43.46669±8.68471
	PW/OPS	36.04545-55.80556	45.04068±3.2264	3.70482-8.35981	5.75108±0.9863	2.84588-20.84722	6.59594±3.5025	4.80967-10.62838	7.09769±1.4223
OCS	ICS/OCS	0.00000-0.00000	0.00000±0.0000	0.43714-1.12385	0.69756±0.1410	0.00000-0.00000	0.00000±0.0000	0.00000-0.00000	0.00000±0.0000
	FW/OCS	27.42553-56.11905	40.07934±5.4905	11.50962-19.48425	14.88702±1.8144	8.74734-56.64179	20.54832±9.4157	12.21967-25.64607	17.59245±3.1866
	FMSH/OCS	1.12121-2.11628	1.53296±0.2138	0.66230-1.16972	0.88887±0.1031	0.52676-3.55224	1.25051±0.6016	0.48322-0.96815	0.67132±0.1228
	5PL/OCS	25.06202-47.13636	34.22789±4.6813	9.36893-16.08661	12.21379±1.4996	8.22642-55.52239	17.58145±8.1704	10.88525-21.83146	15.14115±2.7065
	OPS/OCS	0.28689-0.47496	0.36735±0.0444	0.67314-1.47186	1.01534±0.1800	0.19372-7.13433	1.64763±1.0929	0.62082-1.84483	1.06387±0.2797
	3PCL/OCS	15.44361-31.20238	21.34234±2.9715	6.66007-14.24752	9.61623±1.4197	5.01316-37.07143	14.56458±6.8033	6.78618-13.57051	9.40200±1.6609
	ICW/OCS	75.16000-119.16667	94.01101±11.2673	29.60984-45.09901	36.64094±4.1098	24.75393-136.29851	51.63593±22.6197	30.88926-60.21154	42.08495±7.3536
	IPS/OCS	1.12295-1.74074	1.39942±0.1652	0.69775-1.66169	1.10351±0.1944	0.82166-30.31343	5.15571±5.0451	0.75172-2.00562	1.32817±0.2947
	PWC/OCS	23.55200-44.00000	31.74430±4.1653	9.94410-17.01969	12.95878±1.5593	8.37180-108.11940	25.48037±16.9317	9.86513-19.89655	13.98894±2.4994
	CL/OCS	45.61702-92.89535	67.04017±9.1440	18.92260-32.56075	24.48311±2.8446	16.51538-111.38806	36.56181±16.8272	21.36913-43.94944	29.56172±5.3703
	CW/OCS	80.08000-124.81013	100.08932±11.8546	31.16393-48.70238	38.99345±4.4283	26.82461-144.70149	55.94306±24.5253	32.18421-62.67308	44.55239±7.8207
	5PW/OCS	11.22794-22.44828	16.01752±2.1870	4.32704-8.46429	6.22976±0.8539	3.66667-24.84810	8.39657±3.8889	4.94426-10.09615	7.10706±1.2892
ICS	CL/ICS	-	-	14.29388-32.00000	21.97050±3.9149	-
	OCS/ICS	-	-	1.00000-1.00000	1.00000±0.0000	-
	PL/ICS	-	-	11.26160-30.26316	20.39542±4.3169	-
	PWC/ICS	-	-	26.29956-48.76087	36.02935±5.6712	-
	3PCL/ICS	-	-	11.89873-26.38732	18.02004±3.1941	-
	DFMS/ICS	-	-	20.33878-40.79699	29.25362±4.9664	-
