# Supplementary material for: Morphological descriptions and morphometric discriminant function analysis reveal an additional four groups of Scylla spp
Source: PeerJ. 2020 Jan 3;8:e8066. doi: 10.7717/peerj.8066 (PMC6944125; doi:10.7717/peerj.8066)
Supplement: Table S4 [file peerj-08-8066-s004.xlsx]

## Sheet: S4
Supplementary Table S4: Number of significant discriminant ratios and the most powerful discriminant ratios (100 % discrimination between group if combined) in males (S. olivacea, S. tranquebarica, S. paramamosain, SH 1, SH 2) and females (S. olivacea, S. tranquebarica, S. paramamosain, SH 1).
No.	Divisor	Number of Discriminant Ratios Tested	Number of Significant Discriminant Ratios (Percentage of all combinations)	Number of Insignificant Discriminant Ratios (Excluded)	Excluded Discriminant Ratios	Most Powerful Discriminant Ratios (Number of ratios)
Male
1	CW	24	22 (OG=100%, CVG=100%)	2	CW/CW, ICW/CW	ICS/CW, OCS/CW, 3PCL/CW, FMSH/CW, 5PW/CW, FW/CW, PWC/CW (7)
2	ICW	24	23 (OG=100%, CVG=100%)	1	ICW/ICW	ICS/ICW, OCS/ICW, 3PCL/ICW, FMSH/ICW, 5PW/ICW, FW/ICW, PWC/ICW, 3PML/ICW (8)
3	8CW	24	21 (OG=100%, CVG=100%)	3	ICW/8CW, 8CW/8CW	ICS/8CW, FMSH/8CW, 3PCL/8CW, OCS/8CW, 5PW/8CW, FW/8CW (6)
4	PWC	24	22 (OG=100%, CVG=100%)	2	PWC/PWC, ICW/PWC, AW/PWC	ICS/PWC, FMSH/PWC, 3PCL/PWC, OCS/PWC, 5PL/PWC, FW/PWC (6)
5	CL	24	22 (OG=100%, CVG=100%)	2	CL/CL, AW/CL	ICS/CL, FMSH/CL, 3PCL/CL, PWC/CL, OCS/CL, 5PW/CL, 3PML/CL, DFLS/CL (8)
6	FW	24	22 (OG=100%, CVG=100%)	2	FW/FW, ICW/FW, AW/FW	ICS/FW, FMSH/FW, 5PW/FW, OCS/FW, 3PCL/FW (5)
7	FMSH	24	22 (OG=100%, CVG=100%)	2	FMSH/FMSH, ICW/FMSH	ICS/FMSH, FW/FMSH, 5PW/FMSH, OCS/FMSH, 3PCL/FMSH (5)
8	DFLS	24	22 (OG=100%, CVG=100%)	2	DFLS/DFLS, AW/DFLS	ICS/DFLS, FMSH/DFLS, 5PL/DFLS, 3PML/DFLS, OCS/DFLS, PD/DFLS, DL/DFLS (7)
9	DFMS	24	21 (OG=100%, CVG=100%)	3	DFMS/DFMS, ICW/DFMS, AW/DFMS	ICS/DFMS, FMSH/DFMS, 3PCL/DFMS, 5PW/DFMS, OCS/DFMS, PWC/DFMS, FW/DFMS, 3PML/DFMS (8)
10	SW	24	22 (OG=100%, CVG=100%)	2	SW/SW, ICW/SW, AW/SW	ICS/SW, FMSH/SW, 3PCL/SW, OCS/SW, 5PW/SW, PWC/SW, 3PML/SW, FW/SW, DFLS/SW, 5PL/SW, PD/SW, DL/SW (12)
11	AW	24	22 (OG=100%, CVG=100%)	2	AW/AW, ICW/AW	ICS/AW, FMSH/AW, 3PCL/AW, OCS/AW, 5PW/AW, FW/AW, PWC/AW, 3PML/AW, DFLS/AW, 5PL/AW, PD/AW, DL/AW (12)
12	3PML	24	22(OG=100%, CVG=100%)	2	3PML/3PML, ICW/3PML	ICS/3PML, FMSH/3PML, 5PL/3PML, OCS/3PML, PD/3PML, DL/3PML (6)
13	3PCL	24	23 (OG=100%, CVG=100%)	1	3PCL/3PCL	ICS/3PCL, FMSH/3PCL, 5PW/3PCL, OCS/3PCL, FW/3PCL, 5PL/3PCL, 3PML/3PCL, PD/3PCL, DL/3PCL (9)
14	5PL	24	22 (OG=100%, CVG=100%)	2	5PL/5PL, AW/5PL	ICS/5PL, FMSH/5PL, 3PCL/5PL, OCS/5PL, PD/5PL (5)
15	5PW	24	21 (OG=100%, CVG=100%)	3	5PW/5PW, ICW/5PW, AW/5PW	ICS/5PW, FMSH/5PW, 3PCL/5PW, OCS/5PW, FW/5PW (5)
16	DL	24	22 (OG=100%, CVG=100%)	2	DL/DL, ICW/DL	ICS/DL, FMSH/DL, 5PW/DL, OCS/DL, PD/DL, 3PML/DL (6)
17	PD	24	21 (OG=100%, CVG=100%)	3	PD/PD, ICW/PD, AW/PD	ICS/PD, OCS/PD, DL/PD, FMSH/PD, 5PL/PD, 3PML/PD, DFLS/PD, 5PW/PD (8)
18	PL	24	22 (OG=100%, CVG=100%)	2	PL/PL, ICW/PL	ICS/PL, FMSH/PL, 3PCL/PL, 5PL/PL, OCS/PL, PD/PL (6)
19	ML	24	21 (OG=100%, CVG=100%)	3	ML/ML, ICW/ML, AW/ML	ICS/ML, FMSH/ML, 3PCL/ML, 5PL/ML, OCS/ML (5)
20	PW	24	22 (OG=100%, CVG=100%)	2	PW/PW, AW/PW	ICS/PW, FMSH/PW, 3PCL/PW, 5PL/PW, OCS/PW (5)
21	IPS	24	22 (OG=100%, CVG=100%)	2	IPS/IPS, ICW/IPS	ICS/IPS, FW/IPS, OCS/IPS, 5PW/IPS, 3PML/IPS, FMSH/IPS, 5PL/IPS, 3PCL/IPS (8)
22	OPS	24	20 (OG=100%, CVG=99.9%)	4	OPS/OPS, ICW/OPS, 8CW/OPS, AW/OPS	ICS/OPS, PW/OPS, FMSH/OPS, 5PW/OPS, 3PML/OPS, DFLS/OPS, 5PL/OPS, 3PCL/OPS, OCS/OPS, FW/OPS, DL/OPS, PD/OPS, IPS/OPS, CL/OPS, PWC/OPS, CW/OPS (16)
23	OCS	24	22 (OG=100%, CVG=100%)	2	OCS/OCS, ICW/OCS	ICS/OCS, 3PCL/OCS, 5PW/OCS, FMSH/OCS, PWC/OCS, FW/OCS (6)
24	ICS	24	(OG=51.9%, CVG=51.7%)	12	ICS/ICS, FMSH/ICS, 8CW/ICS, ICW/ICS, DL/ICS, AW/ICS, 5PW/ICS, ML/ICS, 3PML/ICS, DFLS/ICS, FW/ICS, PD/ICS, IPS/ICS, OPS/ICS	OCS/ICS, CW/ICS, 3PCL/ICS, PWC/ICS, CL/ICS, DFMS/ICS, PW/ICS, PL/ICS, SW/ICS (9)
Female
1	CW	24	20 (OG=100%, CVG=100%)	4	CW/CW, DL/CW, SW/CW, DFLS/CW	ICS/CW, FMSH/CW, 5PL/CW, OPS/CW, 3PCL/CW, IPS/CW (6)
2	ICW	24	21 (OG=100%, CVG=100%)	3	ICW/ICW, DFLS/ICW, DL/ICW	ICS/ICW, FMSH/ICW, OPS/ICW, 3PCL/ICW, 5PL/ICW, IPS/ICW, OCS/ICW, CL/ICW, AW/ICW, CW/ICW, 8CW/ICW, PWC/ICW (12)
3	8CW	24	20 (OG=100%, CVG=100%)	4	8CW/8CW, DFLS/8CW, SW/8CW, DL/8CW	ICS/8CW, OPS/8CW, 3PCL/8CW, IPS/8CW, 5PL/8CW (5)
4	PWC	24	17 (OG=100%, CVG=100%)	7	PWC/PWC, DFMS/PWC, DFLS/PWC, FW/PWC, SW/PWC, DL/PWC, PD/PWC	ICS/PWC, OPS/PWC, 5PL/PWC, FMSH/PWC (4)
5	CL	24	17 (OG=100%, CVG=100%)	7	CL/CL, DFLS/CL, PD/DFLS, DL/DFLS, PL/DFLS, SW/DFLS, ML/DFLS	ICS/CL, FMSH/CL, OPS/CL, 3PCL/CL, IPS/CL (5)
6	FW	24	19 (OG=100%, CVG=100%)	5	FW/FW, PD/FW, SW/FW, DFLS/FW, DL/FW,	ICS/FW, FMSH/FW, 3PCL/FW, OPS/FW, CL/FW, IPS/FW (6)
7	FMSH	24	18 (OG=100%, CVG=100%)	6	FMSH/FMSH, SW/FMSH, PL/FMSH, DL/FMSH, DFLS/FMSH, ML/FMSH	ICS/FMSH, 5PL/FMSH, OPS/FMSH, PWC/FMSH (4)
8	DFLS	24	20 (OG=100%, CVG=100%)	4	DFLS/DFLS, DL/DFLS, PD/DFLS, SW/DFLS	ICS/DFLS, FMSH/DFLS, CL/DFLS, OPS/DFLS, 3PCL/DFLS, IPS/DFLS (6)
9	DFMS	24	19 (OG=100%, CVG=100%)	5	DFMS/DFMS, DL/DFMS, PD/DFMS, DFLS/DFMS, SW/DFMS	ICS/DFMS, OPS/DFMS, FMSH/DFMS, 5PL/DFMS, OCS/DFMS, 3PCL/DFMS, IPS/DFMS (7)
10	SW	24	19 (OG=100%, CVG=100%)	5	SW/SW, PL/SW, DL/SW, PD/SW, DFLS/SW	ICS/SW, FMSH/SW, OPS/SW, 3PCL/SW, IPS/SW, 5PL/SW (6)
11	AW	24	19 (OG=100%, CVG=100%)	5	AW/AW, SW/AW, DFLS/AW, PD/AW, DL/AW	ICS/AW, FMSH/AW, CL/AW, OPS/AW, 3PCL/AW, IPS/AW (6)
12	3PML	24	19 (OG=100%, CVG=100%)	5	3PML/3PML, DL/3PML, SW/3PML, PD/3PML, DFLS/3PML	ICS/3PML, FMSH/3PML, 5PL/3PML, OPS/3PML, 3PCL/3PML, IPS/3PML, (6)
13	3PCL	24	19 (OG=100%, CVG=100%)	5	3PCL/3PCL, PD/3PCL, DL/3PCL, SW/3PCL, DFLS/3PCL	ICS/3PCL, FW/3PCL, OPS/3PCL, IPS/3PCL, PW/3PCL (5)
14	5PL	24	19 (OG=100%, CVG=100%)	5	5PL/5PL, SW/5PL, DFLS/5PL, PD/5PL, DL/5PL	ICS/5PL, FMSH/5PL, OPS/5PL, 3PCL/5PL, IPS/5PL (5)
15	5PW	24	19 (OG=100%, CVG=100%)	5	5PW/5PW, PD/5PW, SW/5PW, DFLS/5PW, DL/5PW	ICS/5PW, FMSH/5PW, OPS/5PW, CL/5PW, 3PCL/5PW, IPS/5PW (6)
16	DL	24	20 (OG=100%, CVG=100%)	4	DL/DL, PD/DL, DFLS/DL, SW/DL	ICS/DL, FMSH/DL, CL/DL, OCS/DL, 3PCL/DL, OPS/DL, IPS/DL (7)
17	PD	24	20 (OG=100%, CVG=100%)	4	PD/PD, DL/PD, DFLS/PD, SW/PD	ICS/PD, OPS/PD, FMSH/PD, CL/PD, 3PCL/PD, IPS/PD (6)
18	PL	24	19 (OG=100%, CVG=100%)	5	PL/PL, SW/PL, DFLS/PL, PD/PL, DL/PL,	ICS/PL, FMSH/PL, CL/PL, OCS/PL, OPS/PL, 3PCL/PL, IPS/PL (7)
19	ML	24	19 (OG=100%, CVG=100%)	5	ML/ML, DL/ML, SW/ML, PD/ML, DFLS/ML	ICS/ML, OPS/ML, 5PL/ML, FMSH/ML, 3PCL/ML, IPS/ML (6)
20	PW	24	19 (OG=100%, CVG=100%)	5	PW/PW, DFLS/PW, SW/PW, DL/PW, PD/PW	ICS/PW, OPS/PW, FMSH/PW, CL/PW, 3PCL/PW, IPS/PW (6)
21	IPS	24	16 (OG=100%, CVG=100%)	8	IPS/IPS, PL/IPS, DFLS/IPS, SW/IPS, 3PML/IPS, FW/IPS, PD/IPS, DL/IPS	ICS/IPS, 5PL/IPS, OPS/IPS, 3PCL/IPS, ICW/IPS, FMSH/IPS (6)
22	OPS	24	12 (OG=99.9%, CVG=99.8%)	12	OPS/OPS, AW/OPS, SW/OPS, CL/OPS, FW/OPS, DL/OPS, PL/OPS, DFMS/OPS, ML/OPS, DFLS/OPS, 3PML/OPS, PD/OPS	ICW/OPS, ICS/OPS, FMSH/OPS, OCS/OPS, IPS/OPS, 3PCL/OPS, PWC/OPS, 5PL/OPS, 5PW/OPS, 8CW/OPS, CW/OPS, PW/OPS (12)
23	OCS	24	13 (OG=99.9%, CVG=99.9%)	11	OCS/OCS, 8CW/OCS, DFMS/OCS, SW/OCS, PD/OCS, 3PML/OCS, AW/OCS, DFLS/OCS, PL/OCS, DL/OCS, PW/OCS	ICS/OCS, FW/OCS, FMSH/OCS, 5PL/OCS, OPS/OCS, 3PCL/OCS, ICW/OCS, IPS/OCS, PWC/OCS, CL/OCS, CW/OCS, 5PW/OCS (12)
24	ICS	24	6 (OG=59.3%, CVG=59.3%)	18	ICS/ICS, FMSH/ICS, ICW/ICS, 8CW/ICS, CW/ICS, SW/ICS, FW/ICS, 5PL/ICS, 3PML/ICS, 5PW/ICS, PW/ICS, DL/ICS, DFLS/ICS, PD/ICS, AW/ICS, IPS/ICS, ML/ICS, OPS/ICS	CL/ICS, OCS/ICS, PL/ICS, PWC/ICS, 3PCL/ICS, DFMS/ICS (6)
Male + Female
1	CW	24	23 (OG=100%, CVG=100%)	1	CW/CW	ICS/CW, AW/CW, FMSH/CW, DL/CW, 5PL/CW, OCS/CW, PD/CW, 3PCL/CW, IPS/CW, CL/CW, PW/CW, OPS/CW 3PML/CW, ML/CW (14)
2	ICW	24	23 (OG=100%, CVG=100%)	1	ICW/ICW	ICS/ICW, AW/ICW, FMSH/ICW, DL/ICW, 5PL/ICW, OCS/ICW, PD/ICW, 3PCL/ICW, IPS/ICW, CL/ICW, PW/ICW, OPS/ICW (12)
3	8CW	24	23 (OG=100%, CVG=100%)	1	8CW/8CW	ICS/8CW, AW/8CW, FMSH/8CW, DL/8CW, 5PL/8CW, OCS/8CW, PD/8CW, 3PCL/8CW, IPS/8CW, CL/8CW, PW/8CW, CW/8CW, 3PML/8CW, OPS/8CW (14)
4	PWC	24	23 (OG=100%, CVG=100%)	1	PWC/PWC	ICS/PWC, PW/PWC, AW/PWC, FMSH/PWC, 3PML/PWC, 5PL/PWC, OCS/PWC, 3PCL/PWC, CL/PWC, IPS/PWC, PD/PWC, DL/PWC, CW/PWC (13)
5	CL	24	23 (OG=100%, CVG=100%)	1	CL/CL	ICS/CL, AW/CL, FMSH/CL, 5PL/CL, DL/CL, OCS/CL, PD/CL, 3PCL/CL, IPS/CL, CW/CL, PW/CL, 3PML/CL, OPS/CL (13)
6	FW	24	23 (OG=100%, CVG=100%)	1	FW/FW	ICS/FW, AW/FW, FMSH/FW, 5PL/AW, OCS/FW, PW/FW, 3PML/FW, IPS/FW, 3PCL/FW, PD/FW, CW/FW, DL/FW, CL/FW, OPS/FW (14)
7	FMSH	24	23 (OG=100%, CVG=100%)	1	FMSH/FMSH	ICS/FMSH, AW/FMSH, PL/FMSH, 3PML/FMSH, OCS/FMSH, 5PL/FMSH, IPS/FMSH, 3PCL/FMSH, ICW/FMSH, OPS/FMSH, PD/FMSH, DL/FMSH (12)
8	DFLS	24	23 (OG=100%, CVG=100%)	1	DFLS/DFLS	ICS/DFLS, AW/DFLS, FMSH/DFLS, 5PL/DFLS, DL/DFLS, PD/DFLS, OCS/DFLS, CL/DFLS, 3PCL/DFLS, IPS/DFLS, CW/DFLS, PW/DFLS, OPS/DFLS (13)
9	DFMS	24	23 (OG=100%, CVG=100%)	1	DFMS/DFMS	ICS/DFMS, AW/DFMS, FMSH/DFMS, 5PL/DFMS, DL/DFMS, OCS/DFMS, PD/DFMS, 3PCL/DFMS, IPS/DFMS, CL/DFMS, PW/DFMS, CW/DFMS, OPS/DFMS (13)
10	SW	24	23 (OG=100%, CVG=100%)	1	SW/SW	ICS/SW, AW/SW, FMSH/SW, 5PL/SW, DL/SW, OCS/SW, PD/SW, 3PCL/SW, IPS/SW, CW/SW, PW/SW, OPS/SW, 3PML/SW (13)
11	AW	24	23 (OG=100%, CVG=100%)	1	AW/AW	DL/AW, ICS/AW, FMSH/AW, 5PL/AW, OCS/AW, PD/AW, CL/AW, 3PCL/AW, IPS/AW, CW/AW, PW/AW, 3PML/AW, DFLS/AW, DFMS/AW, ML/AW, 8CW/AW, FW/AW, 5PW/AW, OPS/AW (19)
12	3PML	24	23 (OG=100%, CVG=100%)	1	3PML/3PML	ICS/3PML, AW/3PML, FMSH/3PML, 5PL/3PML, PWC/3PML, 3PCL/3PML, OCS/3PML, PD/3PML, CL/3PML, DL/3PML, OPS/3PML, CW/3PML, PW/3PML, 8CW/3PML, IPS/3PML (15)
13	3PCL	24	23 (OG=100%, CVG=100%)	1	3PCL/3PCL	ICS/3PCL, AW/3PCL, PL/3PCL, FMSH/3PCL, IPS/3PCL, OCS/3PCL, 5PL/3PCL, DL/3PCL, PD/3PCL, CL/3PCL, CW/3PCL, OPS/3PCL, PW/3PCL, 3PML/3PCL, 8CW/3PCL, ML/3PCL (16)
14	5PL	24	23 (OG=100%, CVG=100%)	1	5PL/5PL	ICS/5PL, AW/5PL, FMSH/5PL, DL/5PL, CL/5PL, OCS/5PL, PD/5PL, 3PCL/5PL, IPS/5PL, CW/5PL, PW/5PL, 3PML/5PL, ML/5PL, DFLS/5PL, OPS/5PL (15)
15	5PW	24	23 (OG=100%, CVG=100%)	1	5PW/5PW	ICS/5PW, AW/5PW, FMSH/5PW, DL/5PW, 5PL/5PW, OCS/5PW, CL/5PW, ML/5PW, IPS/5PW, 3PCL/5PW, 3PML/5PW, PD/5PW, ICW/5PW, PW/5PW, OPS/5PW, DFLS/5PW (16)
16	DL	24	23 (OG=100%, CVG=100%)	1	DL/DL	ICS/DL, AW/DL, FMSH/DL, 5PL/DL, PD/DL, CL/DL, OCS/DL, 3PCL/DL, IPS/DL, CW/DL, PW/DL, OPS/DL (12)
17	PD	24	23 (OG=100%, CVG=100%)	1	PD/PD	AW/PD, ICS/PD, FMSH/PD, DL/PD, 5PL/PD, CL/PD, OCS/PD, 3PCL/PD, ICS/PD, CW/PD, PW/PD, OPS/PD, 3PML/PD, ML/PD, 8CW/PD (15)
18	PL	24	23 (OG=100%, CVG=100%)	1	PL/PL	AW/PL, ICS/PL, FMSH/PL, 5PL/PL, CL/PL, DL/PL, OCS/PL, 3PCL/PL, IPS/PL, PD/PL, CW/PL, PW/PL, OPS/PL, 3PML/PL, 8CW/PL, ML/PL, DFLS/PL (17)
19	ML	24	23 (OG=100%, CVG=100%)	1	ML/ML	AW/ML, ICS/ML, FMSH/ML, PD/ML, IPS/ML, PWC/ML, DL/ML, 3PML/ML, FW/ML, OCS/ML, DFMS/ML, DFLS/ML, CL/ML, ICW/ML, CW/ML, 5PW/ML, 8CW/ML, SW/ML, OPS/ML (19)
20	PW	24	23 (OG=100%, CVG=100%)	1	PW/PW	ICS/PW, AW/PW, FMSH/PW, 5PL/PW, DL/PW, CL/PW, OCS/PW, PD/PW, CW/PW, 3PCL/PW, IPS/PW, OPS/PW, 3PML/PW (13)
21	IPS	24	23 (OG=100%, CVG=100%)	1	IPS/IPS	ICS/IPS, PW/IPS, AW/IPS, OCS/IPS, 3PCL/IPS, FMSH/IPS, CW/IPS, 3PML/IPS, 5PL/IPS, PD/IPS (10)
22	OPS	24	23 (OG=99.4%, CVG=99.4%)	3	OPS/OPS, SW/OPS, 8CW/OPS	AW/OPS, ML/OPS, ICS/OPS, FMSH/OPS, 3PCL/OPS, 5PL/OPS, IPS/OPS, OCS/OPS, CW/OPS, 3PML/OPS, PD/OPS, DL/OPS, 5PW/OPS, DFLS/OPS, PW/OPS, DFMS/OPS (16)
23	OCS	24	23 (OG=100%, CVG=100%)	1	OCS/OCS	ICS/OCS, PW/OCS, AW/OCS, FMSH/OCS, 5PL/OCS, 3PML/OCS, IPS/OCS, 3PCL/OCS, 5PW/OCS, CW/OCS, PD/OCS, DL/OCS, OPS/OCS, DFMS/OCS, DFLS/OCS, ML/OCS, FW/OCS, PWC/OCS (18)
24	ICS	24	23 (OG=42.3%, CVG=42.1%)	7	ICS/ICS, 3PML/ICS, DFLS/ICS, 8CW/ICS, ICW/ICS, 5PW/ICS, IPS/ICS	AW/ICS, DL/ICS, OCS/ICS, CW/ICS, PL/ICS, PW/ICS, PWC/ICS, CL/ICS, PD/ICS, SW/ICS, 3PCL/ICS, DFMS/ICS, 5PL/ICS (13)
Note: OG = original grouped cases correctly classified; CVG = cross-validated grouped cases correctly classified; CW = carapace width; ICW = internal carapace width; 8CW = CW at spine 8; PWC = posterior width of carapace; CL = carapace length; FW = frontal width; FMSH = frontal median spine height; DFLS = distance between frontal lateral spines; DFMS = distance between frontal median spines; SW =…
