# Supplementary material for: Morphological descriptions and morphometric discriminant function analysis reveal an additional four groups of Scylla spp
Source: PeerJ. 2020 Jan 3;8:e8066. doi: 10.7717/peerj.8066 (PMC6944125; doi:10.7717/peerj.8066)
Supplement: Table S5 [file peerj-08-8066-s005.xlsx]

## Sheet: Sheet2
Supplementary Table S5: Raw measurements of the 24 morphometric characters of the genus Scylla.
Species	Sex	CW	ICW	8CW	PWC	CL	FW	FMSH	DFLS	DFMS	SW	AW	3PML	3PCL	5PL	5PW	DL	PD	PL	ML	PW	IPS	OPS	OCS	ICS
Scylla olivacea	Male	95.03	90.12	96.9	30.35	70.35	44.29	1.45	4.88	4.72	54.32	26.12	45.92	27.78	30.89	14.68	38.22	33.44	79.85	45.31	22.54	1.52	0.43	0.6	0
		95.03	90.5	96.91	29.51	68.39	43.06	1.41	4.74	4.58	52.8	25.39	44.64	27	30.02	14.27	37.16	32.51	77.62	44.04	21.91	1.28	0.52	0.5	0
		95.08	89.66	96.97	29.82	69.12	43.52	1.42	4.79	4.63	53.37	25.66	45.12	27.29	30.34	14.42	37.55	32.85	78.45	44.51	22.15	1.55	0.53	0.61	0
		95.11	88.83	96.98	30.5	70.7	44.52	1.45	4.9	4.74	54.59	26.25	46.15	27.92	31.04	14.75	38.42	33.61	80.25	45.54	22.65	1.54	0.26	0.79	0
		95.12	89.4	96.99	30.79	71.36	44.93	1.47	4.95	4.78	55.1	26.49	46.58	28.18	31.33	14.89	38.77	33.92	81	45.96	22.86	1.49	0.4	0.63	0
		95.12	88.86	97.06	31.05	71.96	45.3	1.48	4.99	4.82	55.56	26.72	46.97	28.41	31.59	15.01	39.1	34.2	81.68	46.34	23.06	1.28	0.6	0.52	0
		95.43	89.43	97.11	30.98	71.81	45.21	1.48	4.98	4.81	55.44	26.66	46.87	28.36	31.53	14.98	39.02	34.13	81.51	46.25	23.01	1.56	0.25	0.83	0
		95.52	90.96	97.18	29.95	69.42	43.71	1.43	4.81	4.65	53.6	25.77	45.32	27.41	30.48	14.49	37.72	33	78.8	44.71	22.24	1.26	0.51	0.72	0
		95.53	90.23	97.2	31	71.85	45.24	1.48	4.98	4.82	55.47	26.67	46.9	28.37	31.54	14.99	39.04	34.15	81.55	46.27	23.02	1.34	0.33	0.71	0
		95.56	89.6	97.25	30.01	69.56	43.8	1.43	4.82	4.66	53.71	25.83	45.41	27.47	30.54	14.51	37.8	33.06	78.96	44.8	22.29	1.32	0.63	0.52	0
		95.61	89.64	97.32	29.47	68.3	43	1.4	4.74	4.58	52.73	25.36	44.58	26.97	29.98	14.25	37.11	32.46	77.52	43.99	21.88	1.35	0.49	0.83	0
		95.67	90.7	96.39	29.74	68.93	43.4	1.42	4.78	4.62	53.22	25.59	45	27.22	30.26	14.38	37.45	32.76	78.24	44.39	22.09	1.25	0.35	0.89	0
		95.7	89.75	96.41	30.35	70.34	44.29	1.45	4.88	4.71	54.31	26.11	45.92	27.78	30.88	14.68	38.22	33.43	79.84	45.3	22.54	1.42	0.32	0.69	0
		95.71	91.07	95.47	29.64	68.69	43.25	1.41	4.76	4.6	53.04	25.5	44.84	27.12	30.16	14.33	37.32	32.65	77.97	44.24	22.01	1.43	0.55	0.62	0
		95.73	90.94	96.43	29.21	67.71	42.63	1.39	4.7	4.54	52.28	25.14	44.2	26.74	29.73	14.13	36.79	32.18	76.85	43.61	21.69	1.53	0.6	0.57	0
		95.74	91.18	96.49	29.27	67.85	42.72	1.39	4.71	4.55	52.39	25.19	44.29	26.79	29.79	14.16	36.87	32.25	77.02	43.7	21.74	1.23	0.3	0.56	0
		95.77	90.7	96.54	30.61	70.95	44.67	1.46	4.92	4.76	54.78	26.34	46.31	28.02	31.15	14.8	38.55	33.72	80.53	45.69	22.73	1.54	0.47	0.88	0
		95.8	90.02	96.56	29.42	68.19	42.93	1.4	4.73	4.57	52.65	25.32	44.51	26.92	29.94	14.23	37.05	32.41	77.4	43.91	21.85	1.45	0.57	0.58	0
		95.81	89.49	96.61	30.2	70	44.07	1.44	4.85	4.69	54.05	25.99	45.69	27.64	30.73	14.61	38.03	33.27	79.45	45.08	22.43	1.31	0.29	0.61	0
		95.84	90.07	94.72	29.7	68.85	43.35	1.41	4.77	4.61	53.16	25.56	44.94	27.19	30.22	14.37	37.41	32.72	78.14	44.34	22.06	1.58	0.64	0.9	0
		95.89	89.79	96.64	30.34	70.33	44.28	1.44	4.88	4.71	54.3	26.11	45.91	27.77	30.88	14.68	38.21	33.43	79.83	45.29	22.53	1.41	0.65	0.67	0
		95.97	91.21	96.71	31.34	72.64	45.74	1.49	5.04	4.87	56.09	26.97	47.42	28.69	31.89	15.16	39.47	34.53	82.46	46.79	23.28	1.47	0.56	0.88	0
		95.98	89.36	96.86	29.94	69.38	43.68	1.43	4.81	4.65	53.57	25.76	45.29	27.4	30.46	14.48	37.7	32.98	78.75	44.69	22.23	1.59	0.65	0.72	0
		96	89.7	96.87	30.66	71.07	44.74	1.46	4.93	4.76	54.87	26.39	46.39	28.06	31.2	14.83	38.61	33.78	80.67	45.77	22.77	1.25	0.34	0.48	0
		96.01	89.8	96.92	31.11	72.11	45.4	1.48	5	4.83	55.67	26.77	47.07	28.47	31.66	15.05	39.18	34.27	81.85	46.44	23.1	1.61	0.39	0.48	0
		96.07	90.94	96.92	29.51	68.4	43.06	1.41	4.74	4.58	52.81	25.39	44.65	27.01	30.03	14.27	37.16	32.51	77.64	44.05	21.92	1.46	0.3	0.85	0
		96.08	91.06	96.96	29.67	68.76	43.29	1.41	4.77	4.61	53.09	25.53	44.89	27.15	30.19	14.35	37.36	32.68	78.05	44.29	22.03	1.53	0.65	0.56	0
		96.1	89.4	96.96	29.38	68.11	42.88	1.4	4.72	4.56	52.59	25.29	44.46	26.89	29.9	14.21	37.01	32.37	77.3	43.86	21.82	1.26	0.37	0.73	0
		96.16	91.56	96.97	29.48	68.32	43.02	1.4	4.74	4.58	52.75	25.37	44.6	26.98	30	14.26	37.12	32.47	77.55	44	21.89	1.41	0.39	0.78	0
		96.17	91.2	96.98	30.58	70.88	44.63	1.46	4.92	4.75	54.73	26.32	46.27	27.99	31.12	14.79	38.51	33.69	80.45	45.65	22.71	1.31	0.61	0.65	0
		96.19	89.74	97.09	31.13	72.15	45.43	1.48	5	4.84	55.71	26.79	47.1	28.49	31.68	15.06	39.21	34.3	81.9	46.47	23.12	1.22	0.36	0.77	0
		96.34	91.45	97.16	29.29	67.89	42.74	1.39	4.71	4.55	52.42	25.21	44.32	26.81	29.8	14.17	36.89	32.27	77.06	43.72	21.75	1.27	0.53	0.65	0
		96.35	89.9	97.21	30.35	70.34	44.29	1.45	4.88	4.71	54.31	26.12	45.92	27.78	30.88	14.68	38.22	33.43	79.85	45.3	22.54	1.51	0.27	0.56	0
		96.36	90.86	96.26	29.19	67.64	42.59	1.39	4.69	4.53	52.23	25.11	44.16	26.71	29.7	14.11	36.75	32.15	76.78	43.57	21.67	1.37	0.63	0.72	0
		96.45	91.52	98.2	30.92	71.67	45.12	1.47	4.97	4.8	55.34	26.61	46.78	28.3	31.46	14.95	38.94	34.06	81.35	46.16	22.96	1.3	0.37	0.75	0
		96.46	91.62	98.22	29.62	68.66	43.23	1.41	4.76	4.6	53.01	25.49	44.82	27.11	30.14	14.33	37.31	32.63	77.93	44.22	22	1.41	0.54	0.86	0
		96.51	90.13	98.27	29.49	68.35	43.03	1.4	4.74	4.58	52.77	25.38	44.62	26.99	30.01	14.26	37.14	32.49	77.58	44.02	21.9	1.42	0.49	0.7	0
		96.54	90.96	98.27	30.73	71.22	44.84	1.46	4.94	4.77	54.99	26.44	46.49	28.12	31.27	14.86	38.7	33.85	80.84	45.87	22.82	1.58	0.65	0.7	0
		96.55	90.58	98.35	29.08	67.4	42.43	1.38	4.67	4.52	52.04	25.02	43.99	26.61	29.59	14.06	36.62	32.03	76.5	43.41	21.6	1.26	0.36	0.55	0
		96.59	90.29	98.47	29.3	67.9	42.75	1.4	4.71	4.55	52.43	25.21	44.32	26.81	29.81	14.17	36.89	32.27	77.07	43.73	21.76	1.47	0.35	0.52	0
		96.6	91.61	98.49	29.22	67.72	42.63	1.39	4.7	4.54	52.28	25.14	44.2	26.74	29.73	14.13	36.79	32.19	76.86	43.61	21.7	1.3	0.52	0.74	0
		96.65	92.04	98.5	29.19	67.65	42.6	1.39	4.69	4.53	52.24	25.12	44.16	26.71	29.7	14.12	36.76	32.16	76.79	43.57	21.68	1.54	0.24	0.59	0
		96.69	90.32	98.58	30.57	70.86	44.61	1.46	4.91	4.75	54.71	26.31	46.25	27.98	31.11	14.79	38.5	33.68	80.43	45.64	22.7	1.26	0.62	0.76	0
		96.79	91.69	98.64	30.74	71.25	44.86	1.46	4.94	4.78	55.02	26.45	46.51	28.14	31.28	14.87	38.72	33.87	80.88	45.89	22.83	1.33	0.41	0.56	0
		96.81	91.67	98.66	30.41	70.49	44.38	1.45	4.89	4.72	54.42	26.17	46.01	27.83	30.95	14.71	38.3	33.5	80.01	45.4	22.59	1.52	0.38	0.89	0
		96.86	91.96	98.67	29.91	69.32	43.64	1.42	4.81	4.65	53.52	25.74	45.25	27.37	30.43	14.46	37.66	32.95	78.68	44.64	22.21	1.45	0.66	0.61	0
		96.89	91.64	98.84	30.2	69.99	44.07	1.44	4.85	4.69	54.04	25.98	45.69	27.64	30.73	14.6	38.03	33.27	79.44	45.08	22.43	1.3	0.63	0.63	0
		96.92	91.59	98.88	29.56	68.5	43.13	1.41	4.75	4.59	52.89	25.43	44.72	27.05	30.07	14.29	37.22	32.56	77.75	44.12	21.95	1.49	0.61	0.53	0
		96.99	91.87	98.88	29.26	67.82	42.7	1.39	4.7	4.55	52.37	25.18	44.27	26.78	29.78	14.15	36.85	32.24	76.98	43.68	21.73	1.5	0.49	0.57	0
		97	90.72	98.9	29.75	68.96	43.42	1.42	4.78	4.62	53.25	25.6	45.02	27.23	30.28	14.39	37.47	32.78	78.28	44.41	22.1	1.27	0.41	0.55	0
		97.07	90.67	98.98	30.64	71.01	44.71	1.46	4.92	4.76	54.83	26.36	46.35	28.04	31.17	14.82	38.58	33.75	80.6	45.73	22.75	1.28	0.63	0.91	0
		97.14	90.75	98.03	30.18	69.94	44.04	1.44	4.85	4.69	54	25.97	45.66	27.62	30.71	14.59	38	33.24	79.39	45.05	22.41	1.42	0.57	0.55	0
		97.21	90.89	98.07	30.58	70.87	44.62	1.46	4.92	4.75	54.72	26.31	46.27	27.99	31.12	14.79	38.51	33.69	80.45	45.65	22.71	1.42	0.62	0.85	0
		97.24	92.6	98.08	30.45	70.58	44.44	1.45	4.9	4.73	54.5	26.21	46.07	27.87	30.99	14.73	38.35	33.55	80.12	45.46	22.62	1.25	0.64	0.53	0
		97.24	92.26	98.1	29.73	68.9	43.38	1.42	4.78	4.62	53.2	25.58	44.98	27.21	30.25	14.38	37.44	32.75	78.21	44.38	22.08	1.46	0.56	0.66	0
		97.26	92.08	98.12	30.8	71.38	44.94	1.47	4.95	4.78	55.12	26.5	46.6	28.19	31.34	14.9	38.79	33.93	81.03	45.97	22.87	1.25	0.37	0.79	0
		97.27	92.73	98.12	30.34	70.31	44.27	1.44	4.88	4.71	54.29	26.11	45.9	27.76	30.87	14.67	38.2	33.42	79.81	45.28	22.53	1.44	0.63	0.8	0
		97.44	92.06	98.14	30.59	70.9	44.64	1.46	4.92	4.75	54.74	26.32	46.28	28	31.13	14.79	38.52	33.7	80.47	45.66	22.72	1.48	0.27	0.8	0
		97.44	91.08	98.17	29.06	67.35	42.4	1.38	4.67	4.51	52	25	43.96	26.59	29.57	14.05	36.59	32.01	76.44	43.37	21.58	1.27	0.33	0.57	0
		97.49	91.12	98.29	29.58	68.56	43.17	1.21	4.76	4.6	52.94	25.46	44.76	27.07	30.1	14.31	37.25	32.59	77.82	44.16	21.97	1.51	0.33	0.8	0
		97.49	89.54	99.28	31.36	72.68	45.76	1.28	5.04	4.87	56.12	26.98	47.44	28.7	31.91	15.17	39.49	34.55	82.5	46.81	23.29	1.32	0.26	0.83	0
		97.5	89.37	99.34	29.45	68.26	42.98	1.2	4.73	4.58	52.7	25.34	44.56	26.95	29.97	14.24	37.09	32.44	77.48	43.96	21.87	1.59	0.58	0.74	0
		97.51	89.69	99.36	30.69	71.13	44.78	1.25	4.93	4.77	54.92	26.41	46.43	28.09	31.23	14.84	38.65	33.81	80.74	45.81	22.79	1.47	0.57	0.61	0
		97.57	89.85	99.43	30.87	71.55	45.05	1.26	4.96	4.8	55.24	26.56	46.7	28.25	31.41	14.93	38.87	34.01	81.21	46.08	22.92	1.37	0.46	0.69	0
		97.58	91.13	99.51	30.59	70.9	44.64	1.25	4.92	4.75	54.74	26.32	46.28	28	31.13	14.79	38.52	33.7	80.47	45.66	22.72	1.35	0.31	0.77	0
		97.61	91.55	99.53	30.89	71.59	45.07	1.26	4.97	4.8	55.28	26.58	46.73	28.27	31.43	14.94	38.9	34.03	81.26	46.11	22.94	1.61	0.28	0.81	0
		97.63	89.92	99.59	29.18	67.64	42.59	1.19	4.69	4.53	52.23	25.11	44.15	26.71	29.7	14.11	36.75	32.15	76.78	43.56	21.67	1.23	0.27	0.74	0
		97.65	90.51	99.62	30.09	69.75	43.91	1.23	4.84	4.67	53.85	25.89	45.53	27.54	30.62	14.55	37.9	33.15	79.17	44.92	22.35	1.31	0.28	0.52	0
		97.92	90.97	99.72	31.2	72.31	45.53	1.27	5.02	4.85	55.83	26.85	47.2	28.56	31.75	15.09	39.29	34.37	82.08	46.57	23.17	1.55	0.44	0.61	0
		97.96	91.18	99.75	29.33	67.97	42.8	1.2	4.71	4.56	52.48	25.24	44.37	26.84	29.84	14.18	36.93	32.31	77.15	43.78	21.78	1.4	0.45	0.59	0
		98.01	90.21	99.76	30.29	70.21	44.2	1.24	4.87	4.71	54.21	26.07	45.83	27.72	30.82	14.65	38.15	33.37	79.69	45.22	22.5	1.65	0.39	0.62	0
		98.02	92.08	99.77	29.96	69.44	43.72	1.22	4.82	4.65	53.61	25.78	45.33	27.42	30.48	14.49	37.73	33	78.81	44.72	22.25	1.64	0.62	0.79	0
		98.06	91.94	99.85	29.34	68.01	42.82	1.2	4.72	4.56	52.51	25.25	44.39	26.85	29.86	14.19	36.95	32.32	77.19	43.8	21.79	1.47	0.66	0.59	0
		98.08	90.2	100.35	29.86	69.22	43.58	1.42	4.8	4.64	53.44	25.7	45.18	27.33	30.39	14.44	37.61	32.9	78.57	44.58	22.18	1.26	0.47	0.62	0
		98.1	90.09	100.38	30.97	71.77	45.19	1.47	4.98	4.81	55.42	26.65	46.85	28.34	31.51	14.98	39	34.11	81.47	46.22	23	1.23	0.39	0.53	0
		98.2	90.41	100.45	30.48	70.64	44.48	1.45	4.9	4.73	54.54	26.23	46.11	27.89	31.01	14.74	38.38	33.58	80.18	45.5	22.63	1.42	0.62	0.54	0
		98.21	92.03	100.5	29.28	67.87	42.73	1.39	4.71	4.55	52.4	25.2	44.3	26.8	29.8	14.16	36.88	32.26	77.04	43.71	21.75	1.56	0.41	0.77	0
		98.31	92.13	100.52	31.17	72.24	45.48	1.48	5.01	4.84	55.78	26.82	47.16	28.53	31.71	15.07	39.25	34.34	82	46.52	23.15	1.32	0.39	0.71	0
		98.34	92.41	100.59	29.95	69.43	43.71	1.43	4.82	4.65	53.61	25.78	45.32	27.42	30.48	14.49	37.72	33	78.81	44.71	22.25	1.35	0.42	0.57	0
		98.36	91.25	100.66	29.28	67.86	42.73	1.39	4.71	4.55	52.4	25.2	44.3	26.8	29.79	14.16	36.87	32.26	77.03	43.71	21.74	1.46	0.26	0.65	0
		98.36	91.46	100.69	30.24	70.1	44.14	1.44	4.86	4.7	54.13	26.03	45.76	27.68	30.78	14.63	38.09	33.32	79.57	45.15	22.46	1.6	0.66	0.87	0
		98.38	91.82	100.69	29.96	69.45	43.72	1.43	4.82	4.65	53.62	25.78	45.33	27.42	30.49	14.49	37.73	33.01	78.83	44.73	22.25	1.51	0.5	0.59	0
		98.4	91.16	100.71	30.17	69.92	44.02	1.44	4.85	4.69	53.99	25.96	45.64	27.61	30.7	14.59	37.99	33.23	79.37	45.03	22.4	1.66	0.52	0.83	0
		98.41	91.9	100.73	30.22	70.04	44.1	1.44	4.86	4.69	54.08	26	45.72	27.66	30.75	14.61	38.06	33.29	79.5	45.11	22.44	1.43	0.25	0.71	0
		98.46	91.03	100.87	29.72	68.88	43.37	1.42	4.78	4.62	53.19	25.57	44.97	27.2	30.24	14.37	37.43	32.74	78.19	44.36	22.07	1.38	0.29	0.77	0
		98.47	91.8	100.93	29.31	67.94	42.77	1.4	4.71	4.55	52.46	25.22	44.35	26.83	29.83	14.18	36.91	32.29	77.11	43.75	21.77	1.66	0.59	0.57	0
		98.48	91.27	100.94	31.15	72.2	45.46	1.48	5.01	4.84	55.75	26.81	47.13	28.51	31.7	15.07	39.23	34.32	81.95	46.5	23.13	1.4	0.31	0.88	0
		98.49	92.55	100.94	30.01	69.55	43.79	1.43	4.82	4.66	53.7	25.82	45.4	27.46	30.53	14.51	37.79	33.06	78.95	44.79	22.29	1.32	0.28	0.55	0
		98.51	91.9	100.94	29.68	68.79	43.31	1.41	4.77	4.61	53.12	25.54	44.91	27.16	30.2	14.35	37.38	32.7	78.08	44.3	22.04	1.53	0.25	0.85	0
		98.54	91.38	101	30.62	70.96	44.68	1.46	4.92	4.76	54.79	26.35	46.32	28.02	31.15	14.81	38.56	33.73	80.54	45.7	22.74	1.52	0.65	0.51	0
		98.54	90.46	101.05	30.57	70.85	44.61	1.46	4.91	4.75	54.71	26.3	46.25	27.98	31.11	14.78	38.5	33.68	80.42	45.63	22.7	1.58	0.53	0.85	0
		98.57	91.17	101.11	29.18	67.64	42.59	1.39	4.69	4.53	52.23	25.11	44.15	26.71	29.7	14.11	36.75	32.15	76.78	43.56	21.67	1.53	0.59	0.55	0
		98.63	92.51	101.11	30.96	71.75	45.17	1.47	4.98	4.81	55.4	26.64	46.84	28.33	31.5	14.97	38.99	34.1	81.44	46.21	22.99	1.53	0.38	0.87	0
		98.86	91.48	102.03	29.73	68.92	43.39	1.42	4.78	4.62	53.21	25.59	44.99	27.21	30.26	14.38	37.45	32.76	78.23	44.38	22.08	1.6	0.37	0.9	0
		98.9	91.62	102.06	29.73	68.91	43.39	1.42	4.78	4.62	53.21	25.59	44.98	27.21	30.25	14.38	37.44	32.75	78.22	44.38	22.08	1.29	0.33	0.82	0
		98.9	92.08	102.07	30.9	71.62	45.1	1.47	4.97	4.8	55.3	26.59	46.76	28.28	31.45	14.95	38.92	34.04	81.3	46.13	22.95	1.51	0.32	0.7	0
		98.9	92.06	102.07	29.7	68.83	43.34	1.41	4.77	4.61	53.15	25.56	44.93	27.18	30.22	14.36	37.4	32.72	78.13	44.33	22.06	1.47	0.27	0.7	0
		98.92	91.36	102.08	29.05	67.34	42.39	1.38	4.67	4.51	51.99	25	43.95	26.59	29.56	14.05	36.59	32	76.43	43.37	21.58	1.26	0.25	0.7	0
		98.95	91.59	102.09	29.4	68.14	42.9	1.4	4.73	4.57	52.61	25.3	44.48	26.91	29.91	14.22	37.02	32.39	77.34	43.88	21.83	1.31	0.54	0.74	0
		98.98	91.69	102.1	29.99	69.51	43.76	1.43	4.82	4.66	53.67	25.81	45.37	27.45	30.52	14.5	37.77	33.04	78.9	44.77	22.27	1.47	0.35	0.86	0
		98.98	92.35	102.12	30.22	70.05	44.11	1.44	4.86	4.7	54.09	26.01	45.73	27.66	30.75	14.62	38.06	33.3	79.52	45.12	22.45	1.58	0.34	0.55	0
		98.99	91.15	100.2	31.34	72.64	45.73	1.49	5.04	4.87	56.08	26.97	47.42	28.68	31.89	15.16	39.47	34.53	82.45	46.78	23.27	1.37	0.48	0.57	0
		99.01	92.56	100.23	30.56	70.84	44.6	1.46	4.91	4.75	54.69	26.3	46.24	27.97	31.1	14.78	38.49	33.67	80.4	45.62	22.7	1.33	0.47	0.7	0
		99.05	92.55	100.31	29.4	68.15	42.91	1.4	4.73	4.57	52.62	25.3	44.49	26.91	29.92	14.22	37.03	32.39	77.36	43.89	21.84	1.32	0.45	0.81	0
		99.09	93.12	100.36	29.23	67.75	42.65	1.39	4.7	4.54	52.31	25.15	44.22	26.75	29.74	14.14	36.81	32.2	76.9	43.63	21.71	1.36	0.53	0.74	0
		99.15	91.66	100.36	31.05	71.96	45.31	1.48	4.99	4.82	55.56	26.72	46.97	28.41	31.59	15.01	39.1	34.2	81.68	46.34	23.06	1.67	0.27	0.75	0
		99.18	91.54	102.58	29.23	67.75	42.66	1.39	4.7	4.54	52.31	25.15	44.23	26.75	29.74	14.14	36.81	32.2	76.9	43.63	21.71	1.59	0.57	0.81	0
		99.29	91.83	102.61	30.35	70.35	44.29	1.45	4.88	4.72	54.32	26.12	45.92	27.78	30.89	14.68	38.22	33.44	79.85	45.31	22.54	1.56	0.51	0.8	0
		99.29	92.89	101.35	29.96	69.43	43.72	1.43	4.82	4.65	53.61	25.78	45.32	27.42	30.48	14.49	37.73	33	78.81	44.72	22.25	1.59	0.58	0.67	0
		99.31	91.56	101.37	30.58	70.89	44.63	1.46	4.92	4.75	54.73	26.32	46.27	27.99	31.12	14.79	38.52	33.69	80.46	45.65	22.71	1.31	0.55	0.65	0
		99.35	91.53	101.4	29.15	67.56	42.54	1.39	4.69	4.53	52.17	25.08	44.1	26.68	29.66	14.1	36.71	32.11	76.69	43.51	21.65	1.48	0.48	0.5	0
		99.55	91.8	101.7	29.82	69.12	43.52	1.42	4.79	4.63	53.37	25.66	45.12	27.29	30.34	14.42	37.55	32.85	78.45	44.51	22.15	1.29	0.31	0.61	0
		99.65	93.53	101.71	29.47	68.32	43.01	1.4	4.74	4.58	52.75	25.36	44.59	26.98	29.99	14.25	37.12	32.47	77.54	44	21.89	1.39	0.26	0.53	0
		99.74	92.16	101.96	30.64	71.01	44.71	1.46	4.93	4.76	54.83	26.37	46.36	28.04	31.18	14.82	38.59	33.75	80.61	45.74	22.75	1.27	0.64	0.64	0
		99.75	91.86	98.78	31.34	72.65	45.74	1.49	5.04	4.87	56.09	26.97	47.42	28.69	31.89	15.16	39.47	34.53	82.46	46.79	23.28	1.67	0.28	0.54	0
		99.77	92.55	98.81	30.44	70.56	44.42	1.45	4.89	4.73	54.48	26.2	46.06	27.86	30.98	14.72	38.34	33.54	80.09	45.44	22.61	1.44	0.48	0.53	0
		99.79	92.2	98.93	30.96	71.76	45.18	1.47	4.98	4.81	55.41	26.64	46.85	28.34	31.51	14.97	38.99	34.11	81.46	46.22	22.99	1.44	0.4	0.64	0
		99.97	92.52	98.97	30.29	70.2	44.2	1.44	4.87	4.71	54.2	26.06	45.83	27.72	30.82	14.65	38.14	33.37	79.68	45.21	22.49	1.67	0.3	0.79	0
		100	93.26	99	30.68	71.12	44.78	1.46	4.93	4.77	54.91	26.4	46.42	28.08	31.22	14.84	38.64	33.8	80.72	45.8	22.79	1.31	0.62	0.54	0
		103.01	95.36	105.1	31.78	73.66	46.38	1.51	5.11	4.94	56.88	27.35	48.08	29.09	32.34	15.37	40.02	35.01	83.61	47.44	23.6	1.47	0.4	0.59	0
		103.01	95.68	105.19	33.83	78.41	49.37	1.61	5.44	5.26	60.54	29.11	51.18	30.96	34.42	16.36	42.6	37.27	89	50.5	25.12	1.5	0.46	0.64	0
		103.02	96.33	105.3	33.66	78.01	49.12	1.6	5.41	5.23	60.23	28.96	50.93	30.81	34.25	16.28	42.39	37.08	88.55	50.24	25	1.64	0.65	0.72	0
		103.06	96.97	105.32	34.8	80.66	50.78	1.66	5.59	5.41	62.28	29.95	52.65	31.85	35.41	16.83	43.83	38.34	91.55	51.95	25.84	1.5	0.3	0.91	0
		103.07	96.21	105.34	32.81	76.04	47.88	1.56	5.27	5.1	58.71	28.23	49.64	30.03	33.38	15.87	41.32	36.14	86.31	48.97	24.36	1.49	0.32	0.72	0
		103.15	96.83	105.57	31.46	72.92	45.91	1.5	5.06	4.89	56.3	27.07	47.6	28.8	32.02	15.22	39.62	34.66	82.77	46.97	23.37	1.6	0.28	0.58	0
		103.25	96.2	105.72	32.76	75.93	47.81	1.56	5.27	5.09	58.63	28.19	49.57	29.98	33.34	15.84	41.26	36.09	86.19	48.9	24.33	1.43	0.64	0.67	0
		103.36	95.4	105.72	32.07	74.34	46.8	1.53	5.16	4.98	57.4	27.6	48.53	29.35	32.64	15.51	40.39	35.33	84.38	47.88	23.82	1.39	0.53	0.61	0
		103.43	95.55	105.95	32.56	75.48	47.52	1.55	5.23	5.06	58.28	28.02	49.27	29.8	33.14	15.75	41.01	35.87	85.67	48.61	24.18	1.37	0.34	0.63	0
		103.56	96.8	106	33.28	77.13	48.56	1.58	5.35	5.17	59.55	28.63	50.35	30.45	33.86	16.09	41.91	36.66	87.54	49.67	24.71	1.37	0.51	0.9	0
		103.64	96.25	106.03	31.89	73.92	46.54	1.52	5.13	4.95	57.08	27.45	48.25	29.19	32.45	15.42	40.17	35.14	83.91	47.61	23.69	1.5	0.52	0.66	0
		104.28	96.69	105.27	34.72	80.47	50.66	1.65	5.58	5.39	62.13	29.87	52.53	31.77	35.33	16.79	43.72	38.25	91.33	51.82	25.78	1.44	0.61	0.95	0
		104.45	97.57	105.3	32.98	76.44	48.12	1.57	5.3	5.12	59.02	28.38	49.9	30.18	33.56	15.95	41.53	36.33	86.76	49.23	24.49	1.49	0.69	0.74	0
		104.48	96.9	105.5	34.9	80.9	50.94	1.66	5.61	5.42	62.46	30.04	52.81	31.95	35.52	16.88	43.96	38.45	91.83	52.1	25.92	1.38	0.49	0.61	0
		104.59	96.76	105.51	31.95	74.06	46.63	1.52	5.14	4.96	57.18	27.49	48.34	29.24	32.51	15.45	40.24	35.2	84.06	47.69	23.73	1.63	0.34	0.78	0
		104.59	97.83	105.69	32.87	76.18	47.96	1.57	5.28	5.11	58.82	28.28	49.73	30.08	33.44	15.9	41.39	36.21	86.47	49.06	24.41	1.44	0.34	0.75	0
		104.92	96.76	105.71	31.65	73.36	46.19	1.51	5.09	4.92	56.64	27.24	47.89	28.97	32.21	15.31	39.86	34.87	83.27	47.25	23.51	1.56	0.36	0.82	0
		104.95	97.3	105.76	32.68	75.75	47.7	1.56	5.25	5.08	58.49	28.13	49.45	29.91	33.26	15.81	41.16	36.01	85.99	48.79	24.27	1.66	0.69	0.82	0
		104.99	98.37	105.76	31.58	73.18	46.08	1.5	5.08	4.91	56.51	27.17	47.77	28.9	32.13	15.27	39.76	34.78	83.07	47.13	23.45	1.48	0.33	0.54	0
		105.03	98.83	105.83	33.2	76.95	48.45	1.58	5.34	5.16	59.42	28.57	50.23	30.39	33.78	16.06	41.81	36.58	87.35	49.56	24.66	1.47	0.3	0.74	0
		105.06	98.43	105.86	32.46	75.23	47.37	1.55	5.22	5.04	58.09	27.93	49.11	29.71	33.03	15.7	40.88	35.76	85.39	48.45	24.11	1.44	0.48	0.58	0
		105.38	98.86	105.86	31.47	72.94	45.92	1.5	5.06	4.89	56.32	27.08	47.61	28.8	32.02	15.22	39.63	34.67	82.79	46.97	23.37	1.48	0.28	0.75	0
		105.46	99.05	106.04	34.18	79.23	49.88	1.63	5.5	5.31	61.17	29.42	51.72	31.29	34.78	16.53	43.05	37.66	89.93	51.03	25.39	1.57	0.29	0.79	0
		105.47	98.72	106.13	34.37	79.66	50.16	1.64	5.53	5.34	61.51	29.58	52	31.46	34.97	16.62	43.28	37.86	90.42	51.3	25.52	1.62	0.57	0.75	0
		105.56	97.9	106.4	34.17	79.2	49.86	1.63	5.49	5.31	61.15	29.4	51.7	31.27	34.77	16.53	43.03	37.64	89.9	51.01	25.38	1.64	0.52	0.78	0
		106.38	100.43	106.02	33.88	78.53	49.44	1.61	5.45	5.26	60.64	29.16	51.26	31.01	34.48	16.39	42.67	37.33	89.14	50.58	25.16	1.73	0.54	0.97	0
		106.44	100.28	106.09	32.54	75.41	47.48	1.55	5.23	5.05	58.23	28	49.23	29.78	33.11	15.74	40.98	35.84	85.6	48.57	24.16	1.73	0.31	0.67	0
		106.48	99.74	106.3	31.94	74.02	46.61	1.52	5.13	4.96	57.15	27.48	48.32	29.23	32.5	15.45	40.22	35.18	84.02	47.67	23.72	1.65	0.33	0.57	0
		106.51	99.23	106.45	33.45	77.53	48.82	1.59	5.38	5.2	59.86	28.79	50.61	30.62	34.04	16.18	42.13	36.85	88.01	49.93	24.84	1.53	0.52	0.83	0
		106.76	100.3	106.49	34.29	79.47	50.04	1.63	5.51	5.33	61.36	29.51	51.88	31.38	34.89	16.58	43.18	37.77	90.21	51.18	25.46	1.56	0.61	0.9	0
		106.78	99.69	106.49	34.72	80.47	50.67	1.65	5.58	5.39	62.13	29.88	52.53	31.78	35.33	16.79	43.72	38.25	91.34	51.83	25.78	1.63	0.53	0.88	0
		106.88	99.54	106.6	32.94	76.34	48.06	1.57	5.29	5.12	58.94	28.34	49.83	30.14	33.51	15.93	41.48	36.28	86.65	49.16	24.46	1.76	0.63	0.89	0
		106.92	98.39	106.72	33.13	76.79	48.35	1.58	5.33	5.15	59.29	28.51	50.13	30.32	33.71	16.02	41.73	36.5	87.16	49.46	24.61	1.37	0.69	0.81	0
		106.96	99.96	106.86	32.79	76.01	47.85	1.56	5.27	5.09	58.68	28.22	49.61	30.01	33.37	15.86	41.3	36.13	86.27	48.95	24.35	1.44	0.69	0.62	0
		106.97	98.93	107.09	34.04	78.9	49.68	1.62	5.47	5.29	60.92	29.29	51.51	31.16	34.64	16.46	42.87	37.5	89.56	50.82	25.28	1.36	0.4	0.56	0
		107.13	98.28	107.1	33.47	77.59	48.85	1.59	5.38	5.2	59.91	28.81	50.65	30.64	34.06	16.19	42.16	36.88	88.07	49.97	24.86	1.66	0.47	0.89	0
		107.19	98.3	107.21	31.47	72.94	45.92	1.5	5.06	4.89	56.32	27.08	47.61	28.8	32.02	15.22	39.63	34.67	82.79	46.98	23.37	1.46	0.32	0.66	0
		107.25	99.78	107.31	34.67	80.36	50.6	1.65	5.57	5.39	62.05	29.84	52.46	31.73	35.28	16.77	43.66	38.2	91.22	51.76	25.75	1.76	0.3	0.62	0
		107.33	99.03	107.54	34.88	80.85	50.9	1.66	5.61	5.42	62.42	30.02	52.78	31.93	35.49	16.87	43.93	38.43	91.77	52.07	25.91	1.57	0.71	0.78	0
		107.35	99.08	108.68	34.29	79.48	50.04	1.63	5.51	5.33	61.37	29.51	51.89	31.39	34.9	16.59	43.19	37.78	90.22	51.19	25.47	1.66	0.48	0.79	0
		107.49	100.43	108.75	34.86	80.8	50.87	1.66	5.6	5.42	62.39	30	52.75	31.91	35.47	16.86	43.9	38.41	91.72	52.04	25.89	1.54	0.7	0.86	0
		107.56	99.07	108.83	34.8	80.67	50.79	1.66	5.59	5.41	62.28	29.95	52.66	31.85	35.41	16.83	43.83	38.34	91.56	51.95	25.85	1.72	0.52	0.69	0
		108.53	100.1	109.85	33.37	77.34	48.7	1.59	5.36	5.18	59.72	28.72	50.49	30.54	33.96	16.14	42.03	36.76	87.79	49.81	24.78	1.74	0.48	0.85	0
		108.54	100.81	109.86	31.84	73.8	46.47	1.52	5.12	4.95	56.98	27.4	48.18	29.14	32.4	15.4	40.1	35.08	83.77	47.53	23.65	1.73	0.34	0.56	0
		108.56	100.28	109.94	33.95	78.68	49.54	1.62	5.46	5.27	60.75	29.21	51.36	31.07	34.54	16.42	42.75	37.4	89.31	50.67	25.21	1.62	0.67	0.64	0
		108.71	99.53	110.02	33.49	77.61	48.87	1.59	5.38	5.2	59.93	28.81	50.66	30.65	34.07	16.19	42.17	36.89	88.09	49.98	24.87	1.61	0.65	0.72	0
		108.76	100.69	110.14	33.57	77.8	48.99	1.6	5.4	5.21	60.07	28.89	50.79	30.72	34.16	16.23	42.27	36.98	88.31	50.11	24.93	1.8	0.48	0.69	0
		108.8	102.11	110.19	34.29	79.48	50.04	1.63	5.51	5.33	61.37	29.51	51.88	31.39	34.89	16.58	43.19	37.78	90.22	51.19	25.47	1.69	0.56	0.93	0
		108.93	102	110.26	34.03	78.87	49.66	1.62	5.47	5.29	60.9	29.28	51.49	31.15	34.63	16.46	42.86	37.49	89.53	50.8	25.27	1.4	0.32	0.9	0
		109.32	100.22	110.67	32.78	75.99	47.84	1.56	5.27	5.09	58.67	28.21	49.6	30.01	33.36	15.86	41.29	36.12	86.25	48.94	24.35	1.59	0.37	0.68	0
		109.36	100.9	110.67	32.71	75.81	47.73	1.56	5.26	5.08	58.53	28.15	49.49	29.93	33.28	15.82	41.19	36.03	86.05	48.82	24.29	1.81	0.63	0.6	0
		109.86	103.21	110.68	34.2	79.26	49.9	1.63	5.5	5.31	61.2	29.43	51.74	31.3	34.8	16.54	43.07	37.67	89.96	51.05	25.4	1.66	0.63	0.86	0
		109.86	101.79	110.73	31.65	73.36	46.19	1.51	5.09	4.92	56.64	27.24	47.89	28.97	32.21	15.31	39.86	34.87	83.27	47.25	23.51	1.58	0.4	0.73	0
		109.89	101.04	110.76	34.22	79.31	49.94	1.63	5.5	5.32	61.24	29.45	51.77	31.32	34.82	16.55	43.09	37.7	90.02	51.08	25.41	1.42	0.71	0.97	0
		109.96	102.54	111.04	32.13	74.48	46.89	1.53	5.17	4.99	57.5	27.65	48.62	29.41	32.7	15.54	40.47	35.4	84.54	47.97	23.86	1.42	0.37	0.88	0
		110.16	102.31	111.18	33.34	77.28	48.65	1.59	5.36	5.18	59.67	28.69	50.44	30.51	33.93	16.12	41.99	36.73	87.71	49.77	24.76	1.83	0.66	0.88	0
		110.17	101.33	111.31	32.39	75.07	47.27	1.54	5.21	5.03	57.96	27.87	49	29.64	32.96	15.66	40.79	35.68	85.21	48.35	24.05	1.8	0.31	0.84	0
		110.43	102.91	111.44	33.47	77.57	48.84	1.59	5.38	5.2	59.89	28.8	50.63	30.63	34.05	16.19	42.15	36.87	88.05	49.96	24.85	1.83	0.43	0.74	0
		110.51	102.22	111.61	31.94	74.02	46.61	1.52	5.13	4.96	57.15	27.48	48.32	29.23	32.5	15.45	40.22	35.18	84.02	47.67	23.72	1.49	0.56	0.85	0
		110.76	103.42	111.69	33.91	78.59	49.48	1.61	5.45	5.27	60.68	29.18	51.3	31.03	34.5	16.4	42.7	37.35	89.2	50.61	25.18	1.76	0.36	0.82	0
		110.78	102.8	111.76	33.57	77.8	48.99	1.6	5.4	5.21	60.07	28.89	50.79	30.72	34.16	16.23	42.27	36.98	88.31	50.11	24.93	1.57	0.46	0.73	0
		110.85	103.2	111.87	31.69	73.45	46.24	1.51	5.09	4.92	56.71	27.27	47.95	29	32.25	15.33	39.91	34.91	83.37	47.3	23.53	1.43	0.42	0.95	0
		111.65	103.13	112.19	33.32	77.22	48.62	1.59	5.36	5.18	59.62	28.67	50.41	30.49	33.9	16.11	41.96	36.7	87.65	49.73	24.74	1.74	0.66	0.98	0
		111.67	103.63	112.32	34.54	80.05	50.4	1.64	5.55	5.37	61.8	29.72	52.25	31.61	35.14	16.7	43.49	38.05	90.86	51.55	25.65	1.73	0.63	0.74	0
		111.68	102.55	112.38	33.44	77.51	48.8	1.59	5.38	5.2	59.85	28.78	50.6	30.61	34.03	16.17	42.12	36.84	87.98	49.92	24.84	1.7	0.49	0.89	0
		111.83	102.79	112.71	34.37	79.67	50.16	1.64	5.53	5.34	61.52	29.58	52.01	31.46	34.98	16.62	43.29	37.87	90.43	51.31	25.53	1.66	0.31	0.73	0
		111.87	104.09	112.85	33.03	76.55	48.2	1.57	5.31	5.13	59.11	28.42	49.97	30.23	33.61	15.97	41.59	36.38	86.89	49.3	24.53	1.58	0.49	0.86	0
		111.9	104.53	112.92	34.9	80.9	50.94	1.66	5.61	5.42	62.47	30.04	52.81	31.95	35.52	16.88	43.96	38.45	91.83	52.1	25.92	1.64	0.53	0.81	0
		112.08	103.74	110.75	34.92	80.93	50.95	1.66	5.61	5.42	62.49	30.05	52.83	31.96	35.53	16.89	43.97	38.47	91.86	52.12	25.93	1.7	0.39	0.59	0
		112.09	104.92	111.07	33.8	78.34	49.32	1.61	5.43	5.25	60.48	29.08	51.14	30.93	34.39	16.35	42.56	37.23	88.92	50.45	25.1	1.81	0.59	0.69	0
		112.13	104.46	111.17	34.21	79.29	49.92	1.63	5.5	5.31	61.22	29.44	51.76	31.31	34.81	16.54	43.08	37.68	89.99	51.06	25.4	1.78	0.7	0.87	0
		112.14	104.94	111.26	34.43	79.79	50.24	1.64	5.53	5.35	61.61	29.62	52.08	31.51	35.03	16.65	43.35	37.92	90.57	51.39	25.57	1.59	0.6	0.66	0
		112.2	103.96	111.47	31.8	73.71	46.41	1.51	5.11	4.94	56.91	27.36	48.11	29.1	32.36	15.38	40.05	35.03	83.66	47.47	23.62	1.5	0.68	0.71	0
		112.23	103.25	111.52	34.63	80.27	50.54	1.65	5.57	5.38	61.97	29.8	52.4	31.69	35.24	16.75	43.61	38.15	91.11	51.69	25.72	1.61	0.69	0.66	0
		112.58	104.98	111.54	33.03	76.55	48.2	1.57	5.31	5.13	59.1	28.42	49.97	30.23	33.61	15.97	41.59	36.38	86.89	49.3	24.53	1.7	0.61	0.82	0
		113.24	104.84	111.89	34.23	79.33	49.95	1.63	5.5	5.32	61.25	29.45	51.79	31.33	34.83	16.55	43.1	37.71	90.05	51.09	25.42	1.81	0.71	0.73	0
		113.27	105.04	111.98	34.83	80.73	50.83	1.66	5.6	5.41	62.33	29.97	52.7	31.88	35.44	16.84	43.86	38.37	91.63	51.99	25.87	1.8	0.61	0.72	0
		113.27	104.81	112.02	34.17	79.19	49.86	1.63	5.49	5.31	61.14	29.4	51.69	31.27	34.77	16.52	43.03	37.64	89.89	51	25.37	1.49	0.39	0.9	0
		113.3	105.18	112.24	34.94	80.98	50.98	1.66	5.62	5.43	62.52	30.06	52.86	31.98	35.55	16.9	44	38.49	91.91	52.15	25.95	1.47	0.52	0.74	0
		113.31	104.1	112.48	35.18	81.55	51.34	1.68	5.66	5.47	62.96	30.28	53.23	32.2	35.8	17.02	44.31	38.76	92.56	52.52	26.13	1.69	0.43	0.73	0
		113.36	105.91	112.48	34.62	80.24	50.52	1.65	5.57	5.38	61.96	29.79	52.38	31.69	35.23	16.74	43.6	38.14	91.08	51.68	25.71	1.68	0.71	0.87	0
		113.42	104.13	112.58	33.4	77.41	48.74	1.59	5.37	5.19	59.77	28.74	50.53	30.57	33.98	16.15	42.06	36.79	87.86	49.85	24.8	1.64	0.52	0.64	0
		113.43	106.81	112.64	33.5	77.65	48.89	1.6	5.39	5.2	59.95	28.83	50.69	30.66	34.09	16.2	42.19	36.91	88.14	50.01	24.88	1.82	0.72	0.84	0
		113.7	105.88	112.72	31.89	73.91	46.54	1.52	5.13	4.95	57.07	27.44	48.25	29.19	32.45	15.42	40.16	35.13	83.89	47.6	23.68	1.57	0.71	0.88	0
		113.71	106.65	112.8	34.77	80.59	50.74	1.66	5.59	5.4	62.23	29.92	52.61	31.82	35.38	16.82	43.79	38.31	91.48	51.9	25.82	1.76	0.69	0.83	0
		114.14	107.27	116.67	33.8	78.33	49.32	1.61	5.43	5.25	60.48	29.08	51.13	30.93	34.39	16.34	42.56	37.23	88.91	50.45	25.1	1.65	0.61	0.65	0
		114.16	107.14	116.76	31.98	74.12	46.67	1.52	5.14	4.97	57.23	27.52	48.39	29.27	32.54	15.47	40.27	35.23	84.13	47.74	23.75	1.52	0.73	0.62	0
		114.27	107.4	116.93	33.33	77.26	48.64	1.59	5.36	5.18	59.65	28.68	50.43	30.51	33.92	16.12	41.98	36.72	87.69	49.76	24.75	1.88	0.48	0.76	0
		114.3	106.71	116.96	32.4	75.1	47.29	1.54	5.21	5.03	57.99	27.88	49.03	29.66	32.97	15.67	40.81	35.7	85.25	48.37	24.06	1.55	0.46	0.88	0
		114.39	107.77	117.2	31.57	73.17	46.07	1.5	5.07	4.9	56.49	27.17	47.76	28.89	32.12	15.27	39.76	34.78	83.05	47.12	23.44	1.8	0.69	0.87	0
		114.48	107.64	117.28	31.59	73.23	46.1	1.5	5.08	4.91	56.54	27.19	47.8	28.91	32.15	15.28	39.79	34.8	83.12	47.16	23.46	1.72	0.33	0.64	0
		114.53	106.76	117.46	35.19	81.57	51.36	1.68	5.66	5.47	62.98	30.28	53.25	32.21	35.81	17.02	44.32	38.77	92.59	52.53	26.14	1.85	0.33	0.82	0
		114.66	106.95	117.47	33.4	77.42	48.74	1.59	5.37	5.19	59.78	28.74	50.54	30.57	33.99	16.15	42.07	36.8	87.88	49.86	24.81	1.79	0.6	0.96	0
		114.9	107.54	117.47	35.02	81.16	51.1	1.67	5.63	5.44	62.67	30.13	52.98	32.05	35.63	16.94	44.1	38.58	92.13	52.27	26.01	1.62	0.61	0.64	0
		115.37	107.92	118.16	37.45	86.8	54.65	1.78	6.02	5.82	67.02	32.23	56.66	34.27	38.11	18.11	47.16	41.26	98.52	55.9	27.81	1.88	0.74	0.91	0
		115.5	108.25	118.51	36.73	85.14	53.61	1.75	5.91	5.71	65.74	31.61	55.58	33.62	37.38	17.77	46.26	40.47	96.64	54.83	27.28	1.55	0.7	0.91	0
		115.52	107.18	118.85	36.6	84.84	53.41	1.74	5.88	5.69	65.5	31.5	55.38	33.5	37.24	17.7	46.1	40.32	96.29	54.64	27.18	1.76	0.55	0.73	0
		115.61	107.56	118.99	35.58	82.46	51.91	1.69	5.72	5.53	63.67	30.61	53.83	32.56	36.2	17.21	44.8	39.19	93.59	53.1	26.42	1.64	0.62	1.04	0
		116.16	108.14	119.01	37.2	86.23	54.29	1.77	5.98	5.78	66.58	32.01	56.29	34.05	37.86	17.99	46.85	40.99	97.88	55.54	27.63	1.89	0.39	0.78	0
		116.2	107.35	119.13	35.85	83.09	52.31	1.71	5.76	5.57	64.16	30.85	54.24	32.81	36.48	17.34	45.15	39.49	94.31	53.51	26.62	1.61	0.61	0.97	0
		116.59	109.82	119.17	36.19	83.88	52.81	1.72	5.82	5.62	64.76	31.14	54.75	33.12	36.82	17.5	45.57	39.87	95.21	54.02	26.88	1.87	0.67	0.92	0
		117.04	109.84	119.27	39.21	90.88	57.22	1.87	6.3	6.09	70.17	33.74	59.32	35.89	39.9	18.96	49.38	43.2	103.16	58.53	29.12	1.8	0.65	0.89	0
		117.74	108.49	119.3	37.31	86.48	54.45	1.78	6	5.8	66.77	32.11	56.45	34.15	37.97	18.05	46.99	41.11	98.16	55.7	27.71	1.63	0.46	0.92	0
		117.78	110.36	119.4	38.34	88.86	55.95	1.83	6.16	5.96	68.61	32.99	58.01	35.09	39.01	18.54	48.28	42.24	100.87	57.23	28.47	1.7	0.39	0.91	0
		118.08	110.82	119.54	36.79	85.28	53.69	1.75	5.91	5.72	65.85	31.66	55.67	33.67	37.44	17.79	46.34	40.53	96.8	54.92	27.33	1.67	0.53	0.73	0
		118.13	109.65	119.81	39.12	90.66	57.08	1.86	6.29	6.08	70	33.66	59.18	35.8	39.8	18.92	49.26	43.09	102.91	58.39	29.05	1.88	0.52	0.86	0
		118.25	110.19	120.15	36.41	84.39	53.13	1.73	5.85	5.66	65.16	31.33	55.09	33.32	37.05	17.61	45.85	40.11	95.79	54.35	27.04	1.8	0.38	1.02	0
		118.48	109.83	120.17	35.63	82.58	51.99	1.7	5.73	5.53	63.76	30.66	53.9	32.61	36.25	17.23	44.87	39.25	93.73	53.18	26.46	1.77	0.63	0.94	0
		118.54	111.74	120.4	38.46	89.15	56.13	1.83	6.18	5.98	68.83	33.1	58.2	35.2	39.14	18.6	48.44	42.37	101.19	57.42	28.57	1.56	0.48	1.06	0
		118.64	110.79	120.53	37.52	86.96	54.75	1.79	6.03	5.83	67.15	32.29	56.77	34.34	38.18	18.15	47.25	41.33	98.71	56.01	27.86	1.64	0.68	0.75	0
		118.77	110.09	120.68	39.19	90.84	57.19	1.87	6.3	6.09	70.14	33.73	59.3	35.87	39.88	18.95	49.36	43.18	103.11	58.5	29.11	1.92	0.71	0.96	0
		119	110.53	120.82	37.76	87.53	55.11	1.8	6.07	5.87	67.58	32.5	57.14	34.56	38.43	18.26	47.56	41.6	99.35	56.37	28.05	1.79	0.73	0.94	0
		119.18	111.77	121.06	37.21	86.23	54.29	1.77	5.98	5.78	66.58	32.02	56.29	34.05	37.86	17.99	46.86	40.99	97.88	55.54	27.63	1.65	0.6	1.01	0
		119.22	110.8	121.18	36.88	85.49	53.83	1.76	5.93	5.73	66.01	31.74	55.81	33.76	37.53	17.84	46.45	40.63	97.04	55.06	27.39	1.67	0.75	1.03	0
		119.29	112.49	121.28	36.22	83.94	52.85	1.72	5.82	5.63	64.81	31.16	54.79	33.15	36.85	17.51	45.61	39.9	95.28	54.06	26.9	1.6	0.39	1.01	0
		120.98	113.93	118.06	36.04	83.53	52.59	1.72	5.79	5.6	64.49	31.01	54.53	32.98	36.67	17.43	45.38	39.7	94.81	53.79	26.76	1.8	0.46	0.65	0
		121.85	113.88	125.48	36.09	83.65	52.66	1.72	5.8	5.61	64.58	31.06	54.6	33.03	36.72	17.45	45.45	39.76	94.94	53.87	26.8	1.97	0.73	0.77	0
		121.88	113.43	125.55	37.14	86.08	54.2	1.77	5.97	5.77	66.47	31.96	56.19	33.99	37.79	17.96	46.77	40.92	97.71	55.44	27.58	1.65	0.36	1	0
		121.95	112.42	125.68	38.13	88.37	55.64	1.82	6.13	5.92	68.23	32.81	57.69	34.9	38.8	18.44	48.02	42	100.31	56.92	28.32	1.99	0.77	0.93	0
		122.11	112.46	125.98	38.3	88.76	55.89	1.82	6.16	5.95	68.54	32.96	57.94	35.05	38.97	18.52	48.23	42.19	100.75	57.17	28.44	1.81	0.59	0.74	0
		122.64	111.44	126.34	36.89	85.51	53.84	1.76	5.93	5.73	66.03	31.75	55.82	33.77	37.54	17.84	46.46	40.65	97.06	55.07	27.4	1.62	0.42	0.83	0
		122.98	112.42	126.61	35.9	83.2	52.39	1.71	5.77	5.58	64.24	30.89	54.31	32.85	36.53	17.36	45.21	39.55	94.44	53.59	26.66	1.71	0.47	0.72	0
		123.03	113.88	126.62	38.63	89.53	56.37	1.84	6.21	6	69.12	33.24	58.44	35.35	39.3	18.68	48.64	42.55	101.62	57.66	28.69	1.67	0.71	0.92	0
		124.03	113.65	127	39.2	90.86	57.21	1.87	6.3	6.09	70.15	33.73	59.31	35.88	39.89	18.96	49.37	43.19	103.13	58.52	29.11	2.04	0.47	0.69	0
		124.65	113.44	129.53	39.16	90.77	57.15	1.86	6.3	6.08	70.09	33.7	59.25	35.84	39.85	18.94	49.32	43.14	103.03	58.46	29.08	2.01	0.51	0.89	0
		124.66	115.31	129.55	38.63	89.53	56.37	1.84	6.21	6	69.12	33.24	58.44	35.35	39.3	18.68	48.64	42.55	101.62	57.66	28.69	1.91	0.59	1.02	0
		124.82	114.85	129.61	37.6	87.14	54.86	1.79	6.04	5.84	67.28	32.35	56.88	34.41	38.26	18.18	47.35	41.42	98.91	56.12	27.92	1.99	0.56	0.84	0
		124.88	114.05	129.49	35.96	83.34	52.47	1.71	5.78	5.59	64.35	30.94	54.4	32.91	36.59	17.39	45.28	39.61	94.6	53.67	26.7	1.97	0.67	0.99	0
		125.13	116.11	130.77	38.26	88.68	55.83	1.82	6.15	5.94	68.47	32.92	57.89	35.02	38.93	18.5	48.18	42.15	100.66	57.11	28.41	1.8	0.59	0.79	0
		125.37	114.67	130.86	36.59	84.81	53.4	1.74	5.88	5.68	65.48	31.49	55.36	33.49	37.23	17.7	46.08	40.31	96.26	54.62	27.17	1.89	0.65	0.87	0
		125.75	114.89	131.02	35.61	82.55	51.97	1.7	5.73	5.53	63.74	30.65	53.88	32.6	36.24	17.22	44.85	39.23	93.7	53.16	26.45	1.95	0.71	1	0
		126.35	115.72	131.13	38.92	90.2	56.79	1.85	6.26	6.05	69.64	33.49	58.88	35.62	39.6	18.82	49.01	42.87	102.38	58.09	28.9	2.02	0.68	0.74	0
		126.51	118.08	131.29	36.85	85.42	53.78	1.76	5.92	5.73	65.95	31.71	55.76	33.73	37.5	17.82	46.41	40.6	96.96	55.01	27.37	1.67	0.5	0.76	0
		126.73	117.56	131.38	37.09	85.97	54.13	1.77	5.96	5.76	66.38	31.92	56.12	33.95	37.74	17.94	46.71	40.86	97.58	55.37	27.55	1.85	0.55	0.71	0
		126.9	116.74	131.42	35.31	81.84	51.53	1.68	5.68	5.49	63.19	30.38	53.42	32.32	35.93	17.08	44.47	38.9	92.89	52.71	26.22	1.8	0.75	0.88	0
		127.15	117.93	130.82	37.13	86.05	54.18	1.77	5.97	5.77	66.44	31.95	56.17	33.98	37.78	17.96	46.76	40.9	97.67	55.42	27.57	1.92	0.61	0.8	0
		127.79	118.23	130.94	37.07	85.92	54.1	1.77	5.96	5.76	66.34	31.9	56.09	33.93	37.72	17.93	46.69	40.84	97.53	55.34	27.53	1.84	0.68	0.78	0
		128.25	117.33	131.16	36.56	84.73	53.35	1.74	5.88	5.68	65.42	31.46	55.31	33.46	37.2	17.68	46.04	40.27	96.17	54.57	27.15	1.73	0.39	1.02	0
		128.56	119.66	131.23	35.76	82.87	52.18	1.7	5.75	5.55	63.99	30.77	54.1	32.72	36.38	17.29	45.03	39.39	94.07	53.37	26.55	1.71	0.42	1.07	0
		128.67	117.72	131.57	35.73	82.82	52.15	1.7	5.74	5.55	63.95	30.75	54.07	32.71	36.36	17.28	45	39.37	94.01	53.34	26.54	2.09	0.7	1.09	0
		128.75	118.83	131.7	35.45	82.16	51.73	1.69	5.7	5.51	63.44	30.5	53.63	32.44	36.07	17.14	44.64	39.05	93.26	52.91	26.33	1.89	0.57	0.82	0
		128.99	118.99	131.9	39.27	91.02	57.31	1.87	6.31	6.1	70.28	33.79	59.42	35.94	39.96	18.99	49.46	43.26	103.32	58.62	29.17	1.95	0.66	1.06	0
		129.26	119.6	132.09	41.59	96.4	60.69	1.98	6.69	6.46	74.43	35.79	62.93	38.07	42.32	20.11	52.38	45.82	109.42	62.09	30.89	1.89	0.6	1.09	0
		129.27	118.77	132.19	40.21	93.19	58.68	1.91	6.46	6.25	71.96	34.6	60.84	36.8	40.91	19.45	50.64	44.3	105.78	60.02	29.86	1.73	0.79	0.72	0
		129.33	118.99	132.3	42.68	98.93	62.29	2.03	6.86	6.63	76.38	36.73	64.58	39.06	43.43	20.64	53.75	47.02	112.29	63.71	31.7	2.09	0.57	1.09	0
		129.51	120.09	132.38	40.25	93.28	58.73	1.92	6.47	6.25	72.02	34.63	60.89	36.83	40.95	19.46	50.68	44.34	105.88	60.08	29.89	1.86	0.54	0.72	0
		129.9	120.14	132.69	41.78	96.84	60.97	1.99	6.72	6.49	74.78	35.96	63.22	38.24	42.52	20.21	52.62	46.03	109.93	62.37	31.03	2	0.52	0.86	0
		130.1	119.48	132.91	41.46	96.1	60.5	1.97	6.67	6.44	74.2	35.68	62.73	37.95	42.19	20.05	52.21	45.68	109.08	61.89	30.79	2	0.63	0.84	0
		130.32	119.34	132.96	43.23	100.19	63.08	2.06	6.95	6.72	77.36	37.2	65.4	39.56	43.99	20.91	54.44	47.62	113.73	64.53	32.1	1.72	0.62	1.03	0
		130.55	120.47	133.25	42.24	97.91	61.64	2.01	6.79	6.56	75.6	36.35	63.91	38.66	42.98	20.43	53.2	46.54	111.13	63.06	31.37	1.82	0.73	0.77	0
		130.67	121.89	133.42	42.23	97.88	61.63	2.01	6.79	6.56	75.57	36.34	63.89	38.65	42.97	20.42	53.18	46.52	111.1	63.04	31.36	2.03	0.58	0.89	0
		130.8	121.1	133.76	39.63	91.84	57.83	1.89	6.37	6.16	70.91	34.1	59.95	36.27	40.32	19.16	49.9	43.65	104.25	59.15	29.43	2.08	0.56	1.06	0
		131.08	121.52	134.03	41.98	97.3	61.26	2	6.75	6.52	75.13	36.12	63.51	38.42	42.72	20.3	52.87	46.25	110.44	62.66	31.18	2.12	0.44	0.83	0
		131.11	122.14	134.32	39.9	92.47	58.22	1.9	6.41	6.2	71.4	34.33	60.36	36.51	40.6	19.29	50.24	43.95	104.96	59.55	29.63	2.04	0.72	1.02	0
		131.86	122.16	134.63	42.36	98.18	61.81	2.02	6.81	6.58	75.8	36.45	64.09	38.77	43.1	20.49	53.34	46.66	111.44	63.23	31.46	1.91	0.46	0.93	0
		132.51	124	134.65	40.8	94.57	59.54	1.94	6.56	6.34	73.02	35.11	61.73	37.34	41.52	19.73	51.38	44.95	107.34	60.91	30.3	1.94	0.48	1.02	0
		132.75	122.16	135.84	42.59	98.72	62.15	2.03	6.85	6.62	76.22	36.65	64.44	38.98	43.34	20.6	53.64	46.92	112.05	63.58	31.63	2.05	0.71	0.9	0
		132.99	123.97	135.94	43.11	99.93	62.92	2.05	6.93	6.7	77.16	37.1	65.23	39.46	43.87	20.85	54.3	47.5	113.42	64.36	32.02	1.78	0.8	0.97	0
		133.79	123.49	135.95	42.48	98.45	61.98	2.02	6.83	6.6	76.01	36.55	64.27	38.87	43.22	20.54	53.49	46.79	111.75	63.4	31.54	2.03	0.68	1	0
		134.21	124.43	136.44	41.5	96.19	60.56	1.98	6.67	6.45	74.27	35.71	62.79	37.98	42.23	20.07	52.26	45.72	109.18	61.95	30.82	1.83	0.57	1.02	0
		134.35	123.37	136.69	42.14	97.68	61.5	2.01	6.77	6.55	75.42	36.27	63.76	38.57	42.88	20.38	53.07	46.43	110.87	62.91	31.3	2	0.69	0.77	0
		135.97	124.83	132.35	40.22	93.21	58.69	1.92	6.46	6.25	71.97	34.61	60.85	36.81	40.92	19.45	50.65	44.3	105.8	60.03	29.87	2.09	0.57	0.97	0
		136.09	125.17	138.61	42.19	97.8	61.57	2.01	6.78	6.55	75.51	36.31	63.84	38.62	42.93	20.41	53.14	46.48	111.01	62.98	31.34	2.02	0.76	1.05	0
		136.33	127.39	138.64	41.55	96.31	60.64	1.98	6.68	6.46	74.37	35.76	62.87	38.03	42.28	20.1	52.33	45.78	109.32	62.03	30.86	1.9	0.81	0.97	0
		136.4	124.93	139.04	39.82	92.3	58.12	1.9	6.4	6.19	71.27	34.27	60.25	36.45	40.52	19.26	50.15	43.87	104.77	59.45	29.58	2	0.66	1.04	0
		136.67	125.29	139.09	42.8	99.2	62.46	2.04	6.88	6.65	76.6	36.83	64.76	39.17	43.55	20.7	53.9	47.15	112.6	63.89	31.79	1.97	0.8	1	0
		137.19	127.38	139.53	41.28	95.69	60.25	1.97	6.64	6.41	73.88	35.53	62.46	37.78	42.01	19.97	51.99	45.48	108.61	61.63	30.66	2.17	0.42	1.07	0
		137.76	129.29	139.61	42.31	98.07	61.75	2.01	6.8	6.57	75.72	36.41	64.02	38.73	43.06	20.46	53.29	46.61	111.32	63.16	31.42	2.06	0.5	0.82	0
		137.83	127.34	139.62	41.31	95.76	60.29	1.97	6.64	6.42	73.93	35.55	62.51	37.81	42.04	19.98	52.03	45.51	108.69	61.67	30.68	2.15	0.68	1.11	0
		137.95	129.25	140.23	43.06	99.82	62.84	2.05	6.92	6.69	77.07	37.06	65.16	39.41	43.82	20.83	54.23	47.44	113.3	64.28	31.98	1.94	0.82	1.19	0
		138.1	127.61	140.24	41.14	95.36	60.04	1.96	6.61	6.39	73.63	35.4	62.25	37.65	41.86	19.9	51.81	45.32	108.24	61.41	30.55	2	0.66	0.86	0
		138.12	128.8	140.57	40.64	94.19	59.3	1.94	6.53	6.31	72.72	34.97	61.48	37.19	41.35	19.65	51.18	44.77	106.91	60.66	30.18	1.96	0.49	0.83	0
		138.24	128.6	140.58	41.53	96.26	60.61	1.98	6.68	6.45	74.32	35.74	62.84	38.01	42.26	20.09	52.3	45.75	109.26	61.99	30.84	1.98	0.51	1.13	0
		139.38	128.35	140.9	40.55	93.99	59.18	1.93	6.52	6.3	72.57	34.9	61.36	37.12	41.26	19.61	51.07	44.67	106.69	60.53	30.12	2.09	0.48	1.1	0
		140.73	131.13	141.13	42.83	99.28	62.51	2.04	6.89	6.65	76.65	36.86	64.81	39.2	43.58	20.71	53.94	47.19	112.68	63.94	31.81	2.28	0.7	1.05	0
		140.83	132.15	141.26	39.9	92.48	58.23	1.9	6.41	6.2	71.41	34.34	60.37	36.52	40.6	19.3	50.25	43.96	104.97	59.56	29.63	2.28	0.55	0.97	0
		141.36	131.89	141.26	40.88	94.75	59.65	1.95	6.57	6.35	73.16	35.18	61.85	37.41	41.6	19.77	51.48	45.03	107.54	61.02	30.36	2.22	0.61	0.95	0
		141.65	133.03	141.87	43.02	99.71	62.78	2.05	6.92	6.68	76.98	37.02	65.09	39.37	43.77	20.8	54.18	47.39	113.17	64.21	31.95	2.16	0.64	0.97	0
		141.68	131.5	142.12	39.58	91.75	57.77	1.89	6.36	6.15	70.84	34.06	59.89	36.23	40.28	19.14	49.85	43.61	104.14	59.09	29.4	2.1	0.78	0.94	0
		141.73	132.89	142.44	42.54	98.61	62.09	2.03	6.84	6.61	76.14	36.61	64.37	38.94	43.29	20.58	53.58	46.87	111.93	63.51	31.6	2.1	0.72	1.1	0
		141.81	131.69	142.59	41.02	95.06	59.85	1.95	6.59	6.37	73.4	35.29	62.06	37.54	41.74	19.84	51.65	45.18	107.9	61.23	30.46	2.26	0.55	0.98	0
Scylla olivacea	Female	96	91.62	97.29	31.55	62.39	41.54	1.57	4.65	4.59	50.41	41.27	34.64	19.95	32.59	15	29.72	24.47	61.33	34.06	15.71	1.34	0.35	0.97	0
		96	92.29	97.15	29.04	66.86	41.76	1.57	4.56	4.19	49.63	43.14	37.04	20.61	34.25	16.2	32.12	23.54	58.21	32.75	16.13	1.35	0.35	1.08	0
		96.1	91.32	95.45	29.73	66.36	37.65	1.57	4.4	4.59	50.24	45.91	32.56	22.03	34.25	15.59	29.75	25.13	59.75	34.75	16.64	1.33	0.37	0.9	0
		96.1	91.11	97.14	29.03	61.49	37.45	1.55	4.53	4.57	48.11	41.87	33.42	21.29	32.33	14.88	28.34	24.1	63.42	32.13	15.8	1.36	0.37	1.19	0
		96.1	91.1	95.43	31.94	65.16	40.3	1.47	4.31	4.22	47.28	41.74	32.87	20.73	34.09	16.8	29.5	24.13	55.99	34.06	15.85	1.34	0.36	1.1	0
		96.2	92.07	96.53	29.38	68.59	40.09	1.49	4.34	4.11	49.6	42.01	33.87	20.57	32.71	15.76	32	25.17	63.86	34.47	16.51	1.36	0.35	0.9	0
		96.2	91.33	97.36	29.99	62.83	39.82	1.4	4.44	4.57	50.13	43.62	36.15	22.17	34.16	15.66	29.41	22.89	62.12	34.13	16.23	1.35	0.35	0.83	0
		96.3	91.75	97.06	30.4	61.94	40.96	1.43	4.77	4.7	52.54	42.94	36.65	21.62	34.22	16.14	28.5	22.21	60.96	31.99	16.98	1.34	0.37	0.9	0
		96.3	91.28	95.77	32.39	69.47	41.06	1.53	4.2	4.45	52.36	45.84	32.6	22.21	32.24	15.52	30.25	22.58	64	34.88	16.23	1.36	0.36	0.9	0
		96.3	92.51	97.17	29.42	63.23	36.87	1.44	4.28	4.56	51.04	43.94	33.49	22.06	32.31	16.15	32	23.29	57.9	33.27	16.26	1.33	0.36	0.8	0
		96.4	91.88	96.61	31.6	68.98	38.77	1.55	4.76	4.39	48.88	45.93	36.83	20	32.02	16.12	30.66	23.03	62.85	34.38	16.15	1.36	0.36	1.04	0
		96.4	92.49	95.46	29.73	66.58	38.94	1.41	4.3	4.36	51.69	42.81	32.6	19.64	34.23	15.08	30.26	22.5	59.93	34.64	16.78	1.36	0.37	0.95	0
		96.5	91.59	95.61	30.54	67.1	37.51	1.58	4.6	4.15	52.95	42.09	35.23	21.13	34.76	16.68	29.05	22.53	61.14	35.35	15.62	1.36	0.35	0.95	0
		96.5	92.34	97.75	30.4	66.62	36.84	1.45	4.66	4.49	49.21	43.37	33.36	21.7	34.11	15.24	30.59	22.59	57.98	31.3	16.63	1.34	0.34	0.87	0
		96.6	91.68	96.58	29.85	61.58	40.75	1.4	4.48	4.38	48.56	40.81	34.49	21.38	35	15.3	29.16	23.54	56.6	35.39	16.44	1.35	0.36	0.88	0
		96.6	92.07	96.11	29.22	61.96	40.13	1.57	4.24	4.13	49.33	42.51	36.66	19.67	33.26	15.32	31.48	22.84	55.68	34.93	15.33	1.37	0.36	0.95	0
		96.7	91.79	96.94	32.45	61.74	36.55	1.47	4.48	4.49	48.14	45.59	33.61	20.92	34.35	15.89	31.17	24.22	57.67	32.96	15.55	1.35	0.37	0.98	0
		96.7	92.34	98.33	31.87	62.83	41.29	1.59	4.67	4.13	52.1	41.54	34.18	20.28	34.21	15.95	28.88	24.06	59.73	31.19	15.68	1.36	0.35	0.91	0
		96.7	92.01	96.38	29.56	70.13	38.17	1.6	4.6	4.24	47.68	43.31	33.7	20.35	31.73	15.38	28.44	24.21	62.39	34.76	16.49	1.36	0.34	0.96	0
		96.8	92.31	98.44	33.12	63.88	41.96	1.41	4.44	4.69	48.74	46.12	34.22	21.6	35.3	14.97	31.35	25.3	58.47	33.98	17.12	1.36	0.35	1.11	0
		96.8	91.76	97.24	31.63	70.28	41.35	1.5	4.57	4.18	49.27	41.96	36.53	22.37	32.92	16.76	28.86	22.63	61.12	32.81	15.98	1.36	0.34	0.94	0
		96.8	91.76	98.5	29.26	69.58	40.57	1.5	4.58	4.22	52.27	42.25	37.3	21.45	34.3	15.78	30.87	25.02	58.23	32.25	15.88	1.35	0.36	0.81	0
		97.1	92.83	96.28	31.14	62.49	39.5	1.48	4.53	4.58	47.77	41.95	32.86	21.24	31.76	16.29	28.21	25.08	63.03	33.65	16.66	1.35	0.34	1.13	0
		97.1	93.4	98.22	33.34	66.28	41.3	1.55	4.5	4.11	52.4	45.78	36.95	22.37	35.55	15.84	31.48	24.62	62.43	31.33	16.76	1.37	0.37	1.2	0
		97.2	92.95	96.7	31.28	65.7	41.26	1.45	4.6	4.48	47.93	43.59	33.83	22	31.69	15.92	32.38	25.24	58.61	32.87	15.31	1.35	0.37	0.78	0
		97.2	92.92	97.07	29.9	66.91	40.99	1.54	4.52	4.3	48.19	40.26	37.07	21.79	34.86	15.89	31.83	23.14	63.55	34.4	15.86	1.35	0.35	0.91	0
		97.2	93.27	97.15	30.51	62.31	39.12	1.49	4.41	4.5	52.45	40.51	35.76	21.28	33.34	15.39	29.24	24.25	60.56	33.07	16.31	1.37	0.34	0.89	0
		97.2	92.92	96.77	30.01	64.21	40.45	1.56	4.36	4.62	48.2	42.28	33.19	22.02	33.39	16.27	31.02	24.74	56.25	34.11	16	1.37	0.37	1.12	0
		97.3	92.36	97.68	32.99	66.34	40.24	1.49	4.75	4.6	47.9	44.76	35.37	22.07	31.81	15.05	28.98	22.39	58.64	31.94	17.24	1.35	0.35	0.87	0
		97.3	92.71	97.12	31.97	68.53	38.59	1.41	4.25	4.5	51.77	43.17	37.35	20.63	34.74	16.54	30.35	22.69	61.07	33.07	16.28	1.35	0.36	0.9	0
		97.4	93.32	97.32	31.39	64.32	38.44	1.44	4.79	4.68	48.35	46.1	32.98	21.23	35.57	16.59	28.41	25.35	57.51	35.64	16.17	1.36	0.36	0.84	0
		97.4	92.65	99.06	31.36	62.28	38.35	1.52	4.33	4.41	49.62	45.41	32.57	20.92	32.23	15.56	29.28	24.89	60.03	33.51	15.5	1.38	0.37	1.13	0
		97.6	93.01	98.98	30.47	66.67	37.79	1.42	4.45	4.3	49.78	46.06	33.38	20.92	35.22	15.19	30.99	24.09	58.01	32.13	16.94	1.35	0.36	0.9	0
		97.7	93.91	97.41	29.97	64.01	41.09	1.52	4.49	4.14	51.74	45.6	33.6	21.01	33.1	15.16	28.43	23.62	56.59	35.16	16.01	1.38	0.35	0.92	0
		97.7	92.81	96.95	32.09	68.71	37.93	1.58	4.65	4.57	46.93	43.29	35.62	21.74	32.96	16.1	29.75	22.46	59.83	33.22	15.37	1.35	0.36	1.03	0
		97.8	93.94	98.29	32.85	69.64	41.16	1.43	4.56	4.51	48.78	44.42	35.33	19.79	35.39	15.74	31.38	22.22	56.54	33.69	16.77	1.35	0.37	1.02	0
		97.8	92.96	97.34	29.19	64.26	38.83	1.48	4.52	4.58	47.94	44.12	33.84	20.75	33.5	15.68	32.4	23.47	63.25	34.15	15.25	1.38	0.37	1.12	0
		97.9	93.97	97.97	31.69	69.31	39.31	1.46	4.41	4.7	52.92	41.12	37.04	21.54	35.35	14.94	29.08	25	63.8	34.92	16.04	1.38	0.36	0.93	0
		97.9	93.56	97.17	31.83	66.23	38.27	1.44	4.4	4.58	52.25	40.65	35.56	19.71	34.57	15.83	31.77	25	56.12	35.41	15.6	1.38	0.35	0.85	0
		98	93.95	98.22	29.61	62.89	37.46	1.4	4.68	4.6	51.51	42.68	36.11	22.17	31.78	15.34	29.52	24.08	62.58	34.84	17.33	1.36	0.37	1.05	0
		98	93.34	98.38	29.11	68.18	38.76	1.5	4.51	4.52	52.84	41.29	36.59	19.69	32.36	15.29	32.19	22.92	60.8	31.64	15.65	1.37	0.37	0.82	0
		98.1	93.02	97.22	32.25	67.67	41.67	1.56	4.23	4.43	48.91	41.37	32.75	22.43	34.56	14.96	30.35	23.96	60.06	31.82	17	1.35	0.36	0.81	0
		98.1	93.95	98.87	30.1	61.71	39.1	1.57	4.81	4.26	48.69	40.55	35.67	19.85	31.69	14.96	31	24.3	59.39	35.47	15.55	1.37	0.36	1.11	0
		98.2	93.23	99.02	32.04	65.96	41.66	1.43	4.76	4.3	51.77	42.39	33.09	21.56	35.54	15.41	28.18	22.05	63.75	33.65	17.23	1.36	0.37	1.13	0
		98.2	94.49	97.4	31.54	62.24	37.39	1.43	4.7	4.2	51.57	42.81	35.12	22.11	31.84	14.94	28.45	23.21	62.08	31.73	16.38	1.38	0.37	1.05	0
		98.2	93.79	99.65	31.95	66.57	38.09	1.56	4.31	4.61	46.64	43.57	34.85	19.64	34.87	15.74	28.65	24.81	59.75	33.07	16.29	1.38	0.36	1.02	0
		98.3	93.92	99.01	30.98	62.87	36.66	1.6	4.43	4.15	50.08	40.9	34.1	19.7	34.39	16.85	31.64	24.58	60.81	31.78	16.16	1.39	0.35	0.94	0
		98.4	93.54	98.1	30.53	61.49	37.64	1.43	4.75	4.46	48.11	43.05	33.17	21.79	35	16.44	31.63	22.81	59.13	33.02	17.15	1.37	0.37	1.13	0
		98.5	94.39	98.25	31.49	68.82	39.22	1.43	4.56	4.31	49.73	41.96	33.38	22.4	34.22	15.76	29.96	23.85	60.02	33.98	16.71	1.39	0.35	1.13	0
		98.5	94.78	98.75	31.37	62.32	40.4	1.4	4.28	4.34	52.08	46.05	36.75	20.72	35.6	16.32	31.18	22.78	62.41	35.51	16.89	1.39	0.37	0.89	0
		98.6	93.97	98.22	31.38	65.08	37.41	1.56	4.75	4.63	52.71	40.53	35.47	22.48	32.51	15.91	32.2	24.62	58.18	31.22	16.67	1.37	0.37	0.79	0
		98.6	93.78	98.26	32.97	65.97	38.94	1.57	4.26	4.36	46.67	45.69	33.73	21.1	31.41	16.69	31.28	23.96	60.06	32.39	16.85	1.38	0.36	1.21	0
		98.6	94.77	99.83	33.15	67.04	37.75	1.5	4.68	4.17	50.93	44.25	32.93	22.31	32.31	15.87	31.52	24.93	58.47	33.66	16.41	1.37	0.36	0.83	0
		98.6	93.65	99.38	31.42	62.38	37.73	1.59	4.78	4.67	47.27	41.13	33.02	22.21	35.8	15.3	28.18	24.93	60.15	35.77	15.29	1.39	0.37	0.91	0
		98.6	94.57	99.24	29.82	61.6	38.99	1.4	4.19	4.14	46.63	43.11	37.05	19.8	32.18	14.84	31.63	25.32	56.91	32.69	15.73	1.36	0.38	1.15	0
		98.6	94.08	98.54	31.07	62.07	39.38	1.45	4.5	4.2	49.45	40.96	35.85	19.6	31.55	16.13	31.99	25.3	56.5	34.22	16.96	1.38	0.37	1.01	0
		98.7	94.87	98.07	32.49	70.1	38.48	1.49	4.71	4.1	48.18	45.85	34.94	21.73	34.57	15.56	29.8	23.23	61.42	31.74	16.37	1.38	0.36	1.13	0
		98.8	94.02	100.47	29.59	69.99	41.51	1.54	4.19	4.52	49.93	43.35	32.68	20.45	32.76	15.01	31.56	24.3	57.85	31.45	17.13	1.38	0.35	0.89	0
		98.8	95.07	99.22	30.69	62.03	38.61	1.6	4.76	4.55	49.88	45.19	34.24	20.55	31.62	16.21	30.2	23.62	56.84	32.69	15.76	1.37	0.35	1.04	0
		98.8	94.63	99.87	33.32	65.15	36.63	1.58	4.58	4.36	49.6	42.42	36.68	20.6	35.43	15.84	31.26	24.94	58.19	32.98	16.61	1.38	0.37	0.84	0
		98.8	94.84	99.23	29.4	67.06	41.82	1.6	4.4	4.1	50.92	40.13	35.38	22.14	33.86	15.86	30.35	24.23	62.81	35.86	17.33	1.37	0.35	0.88	0
		98.8	93.83	98.38	29.39	66.14	37.77	1.48	4.43	4.59	49.88	43.76	36.2	20.01	32.95	15.44	32.24	24.98	62.81	35.4	16.98	1.37	0.36	0.8	0
		98.8	94.05	99.13	32.34	68.46	38.14	1.54	4.2	4.13	52.05	44.33	35.51	20.98	34.18	16.56	30.15	24.26	59.7	33.05	15.58	1.39	0.36	0.94	0
		98.9	93.95	99.1	32.75	64.22	38.86	1.49	4.33	4.44	49.89	41.59	35.61	22.34	32.14	16.31	31.05	23.36	56.57	32.63	16.06	1.38	0.35	1.04	0
		98.9	94.99	98.99	30.33	68.07	37.28	1.54	4.46	4.52	46.34	43.97	33.14	21.25	33.64	15.8	28.74	25.13	58.02	31.66	15.54	1.4	0.38	1.17	0
		98.9	94.88	98	33.2	63.55	41.68	1.4	4.36	4.21	51.47	41.83	33.43	21.67	32.21	16.45	31.66	25.35	57.13	34.46	17.27	1.39	0.36	0.82	0
		98.9	94.47	98.41	29.35	64.85	41.04	1.4	4.39	4.12	52.47	43.93	33.33	21.55	34.83	15.83	30.31	23.43	60.01	34.88	16.19	1.4	0.36	1.06	0
		98.9	94.43	98.89	30.35	62.61	39.61	1.56	4.2	4.69	51.22	40.79	35.09	20.5	32.63	16.02	28.17	23.19	60.25	31.76	16.6	1.39	0.35	1.09	0
		99	93.9	98.34	31.23	66.86	38.35	1.59	4.53	4.64	51.38	45.24	33.96	22	35.86	16.61	29.32	22.46	55.67	34.13	16.83	1.37	0.35	1.22	0
		99	92.38	100.33	29.8	69.11	40.4	1.57	4.76	4.5	47.19	43.69	37.13	20.13	32.04	16.55	30.6	25.33	61.54	34.99	17.06	1.38	0.36	1.1	0
		99	92.61	99.08	32.27	63	39.41	1.42	4.28	4.54	49.28	44.46	37.1	21.49	34.38	16.84	30.08	22.69	61.87	32.62	16.96	1.37	0.36	0.99	0
		99	93.27	99.76	31.19	65.31	40.38	1.48	4.68	4.59	46.59	44.85	36.35	21.75	32.62	14.95	31.75	24.65	62.53	31.19	16.23	1.37	0.37	1.19	0
		99.1	93.79	99.26	31.19	64.86	39.2	1.54	4.46	4.28	50.86	42.84	36.44	19.66	32.11	16.38	28.76	24.16	61.89	34.28	16.44	1.4	0.38	1.1	0
		99.1	94.69	99.99	29.8	62.04	37.63	1.42	4.61	4.47	46.41	41.75	34.73	20.53	35.49	16.48	29.73	25.15	61.03	33.03	16.79	1.4	0.37	0.9	0
		99.1	94.61	100.71	33.23	62.31	36.55	1.58	4.35	4.64	47.32	41.16	34.75	20.7	35.34	15.56	29.88	24.42	63.27	35.68	15.91	1.37	0.38	0.98	0
		99.1	92.33	100.23	31.89	66.35	40.4	1.6	4.53	4.43	49.79	40.76	35.15	22.1	32.07	16.04	29.86	24.32	59.23	32.25	16.81	1.38	0.36	1.14	0
		99.2	93.94	99.09	32.98	67.74	37.38	1.41	4.43	4.16	47.14	44.38	32.6	21.39	32.43	15.95	29.3	25.08	56.27	34.87	15.25	1.39	0.37	0.92	0
		99.2	93.13	99.76	31.25	64.11	37.86	1.54	4.36	4.41	48.4	42.62	32.89	19.75	33.64	16.17	30.1	24.07	56.2	31.21	16.37	1.38	0.35	1.19	0
		99.2	93.54	98.35	32.7	64.7	36.75	1.56	4.81	4.42	51.94	45.91	37.24	21.51	33.09	15.81	31.77	23.93	57.07	33.88	16.83	1.4	0.36	0.99	0
		99.2	93.1	100.78	29.91	63.7	37.26	1.42	4.61	4.48	47.52	43.64	37.02	20.47	35.68	15.46	28.22	23.84	58.1	34.98	15.23	1.38	0.35	0.94	0
		99.2	92.54	100.26	30.55	63.61	39.97	1.4	4.38	4.48	47.08	45.84	32.97	21.49	32.98	15.83	30.79	22.34	59.91	34.63	15.47	1.39	0.36	1.13	0
		99.3	93.78	100.32	33.32	62.48	41.56	1.52	4.66	4.49	50.16	40.74	33.73	19.95	34.42	16.11	29.48	22.47	55.93	32.41	15.43	1.38	0.37	0.95	0
		99.3	94.58	98.99	31.3	61.97	40.45	1.48	4.41	4.5	49.03	42.75	35.24	21.75	35.31	15.14	31.43	24.8	57.25	33.22	15.9	1.37	0.38	1	0
		99.4	94.33	100.69	32.82	65.1	38.59	1.58	4.81	4.13	49.04	40.22	33.45	20.54	34.74	15.07	29.48	25.36	63.09	31.69	17.32	1.39	0.35	1	0
		99.4	93.06	100.49	31.32	65.52	36.79	1.58	4.72	4.65	48.92	41.38	32.94	21.02	35.44	15.37	31.25	24	61.06	35.82	16.43	1.4	0.37	1.14	0
		99.4	94.41	99.03	32.45	61.54	40.38	1.53	4.67	4.53	47.28	40.19	35.39	21.66	34.96	16.57	31.33	23.94	61.63	33.19	15.86	1.37	0.36	0.93	0
		99.4	94.44	99.89	30.33	69.17	39.42	1.6	4.31	4.58	47.69	45.96	33.93	22.42	34.29	15.04	31.46	24.37	58.04	35.34	15.64	1.39	0.36	0.99	0
		99.5	94.96	100.83	32.61	66.13	40.8	1.52	4.78	4.16	52.16	40.84	36.72	20.85	35.89	14.97	29.56	23.62	58.68	33.36	15.43	1.4	0.35	1.14	0
		99.5	92.22	99.94	30.61	62.02	39.59	1.59	4.54	4.32	50.18	45.22	32.99	20.69	33.49	16.37	31.62	24.66	58.09	33.17	17.08	1.38	0.37	0.97	0
		99.5	95.23	100.89	31.64	70.23	39.78	1.43	4.54	4.34	48.76	40.41	32.64	19.65	31.57	16.7	28.39	24.04	59.94	31.54	15.31	1.39	0.36	1.14	0
		99.5	92.85	100.44	32.34	65.9	39.42	1.42	4.35	4.49	53.22	43.46	34.1	20.77	35.83	15.75	29.16	22.45	60.08	35.78	16.07	1.39	0.35	1.13	0
		99.5	92.65	98.83	32.49	65.17	40.74	1.43	4.61	4.61	51.15	41.01	36.51	22.46	33.53	14.84	30.89	24.66	61.17	35.05	15.98	1.39	0.38	1.14	0
		99.6	94.49	101.17	29.58	68.96	38.73	1.46	4.81	4.36	48.48	41.06	34.33	19.86	32.22	15.59	32.06	24.07	60.49	35.48	16.32	1.39	0.38	1.19	0
		99.7	92.28	100.61	32.27	61.72	37.78	1.5	4.32	4.13	49.99	46.01	37.1	22.49	34.51	15.97	28.66	22.39	57.29	34.38	16.53	1.39	0.38	0.96	0
		99.7	92.72	98.99	32.91	66.53	38.96	1.5	4.45	4.56	47.09	42.86	32.69	20.9	31.52	15.35	29.77	23.4	63.13	31.58	17.3	1.38	0.35	1.08	0
		99.7	93.06	99.1	29.96	69.22	41.9	1.41	4.29	4.58	51.48	43.28	34.71	22.02	33.89	15.37	30.19	24.66	61.08	32.87	17	1.41	0.38	1.01	0
		99.7	92.65	99.24	31.49	61.53	36.87	1.47	4.68	4.16	49.42	40.21	34.71	21.24	34.58	15.03	28.2	22.58	56.42	35.79	15.54	1.4	0.38	0.9	0
		99.7	92.45	99.83	30.25	62.12	36.61	1.55	4.61	4.3	47.59	40.32	33.8	22	35.54	15.53	30.44	24.68	55.79	32.44	16.33	1.4	0.36	1.23	0
		99.8	92.07	99.89	29.97	61.5	40.9	1.45	4.61	4.14	50.53	45.02	33.24	20.93	32.3	15.63	30.1	24.91	58.71	33.61	15.27	1.41	0.37	0.96	0
		99.8	93.61	100.74	30.42	62.76	38.55	1.53	4.44	4.46	49.83	42.9	36.32	22.42	32.09	15.19	31.76	25.26	57.74	31.64	15.26	1.39	0.37	0.85	0
		99.8	94.74	101.06	29.07	62.95	38.66	1.44	4.73	4.53	46.52	43.1	33.84	21.01	32.59	16.59	28.71	23.21	55.7	33.05	16.63	1.38	0.36	0.89	0
		99.8	95.26	99.08	29.69	64.09	37.91	1.45	4.79	4.56	47.23	43.51	35.59	21.54	32.13	15.15	31.42	24.88	62.69	31.29	17.18	1.41	0.35	1.16	0
		99.8	93.86	99.95	33.03	69.1	36.71	1.58	4.42	4.46	48.72	41.82	36.71	20.72	31.4	16.79	31.69	23.41	56.29	31.96	15.61	1.4	0.38	0.91	0
		99.9	94.37	100.76	30.29	68.78	38.49	1.59	4.48	4.46	48.88	43.67	35.3	19.9	31.6	16.68	31	22.39	60.28	33.73	15.63	1.41	0.35	0.95	0
		99.9	94.89	101.54	31.3	67.31	40.42	1.56	4.52	4.32	49.96	43.05	34.05	22.42	31.44	14.71	30.32	23.78	57.25	35.05	15.45	1.4	0.38	1.22	0
		99.9	95.24	101.57	30.37	69.44	37.93	1.47	4.33	4.32	50.56	43.94	34.83	20.27	32.71	16.86	29.14	23.87	57.89	35.53	16.18	1.4	0.36	1.1	0
		99.9	92.34	99.94	33.22	67.56	40.12	1.53	4.36	4.1	47.46	44.06	37.18	20.73	33.18	16.66	28.7	22.78	59.21	31.74	15.82	1.38	0.35	1.12	0
		99.9	94.16	99.57	30.62	62.43	41.69	1.44	4.56	4.37	51.19	43.6	34.81	20.63	35.36	16.32	31.97	24.91	63.62	32.61	15.45	1.38	0.37	1.12	0
		99.9	95.59	99.17	29.03	63.75	41.84	1.59	4.54	4.54	52.65	42.12	36	19.94	35.95	15.37	31.08	22.32	58.6	33.19	15.73	1.38	0.36	0.86	0
		100.1	93.25	99.23	32.59	67.26	39.18	1.6	4.75	4.34	49.1	44.18	33.41	20.78	33.71	15.22	30.03	24.91	62.02	32.92	16.68	1.39	0.35	1.07	0
		100.1	95.33	101.08	29.98	65.28	38.32	1.46	4.67	4.3	53.1	42.97	37.15	20.96	34.84	16.45	29.61	23.16	57.34	32.51	16.87	1.41	0.36	1.25	0
		100.1	92.83	100.46	33.3	68.92	41.03	1.54	4.48	4.6	53.18	44.71	33.14	21.91	32.29	14.88	30.9	23.51	57.81	34.55	16.18	1.39	0.35	0.98	0
		100.1	92.57	101.5	30.44	69.85	41.15	1.49	4.44	4.42	51.96	42.79	34.4	21.76	32.35	15.36	30.93	22.41	56.88	33.59	15.76	1.41	0.36	1.2	0
		100.1	94.35	100.5	29.04	67.31	40.16	1.44	4.72	4.59	53.04	40.64	33.5	22.17	34.33	16.45	28.73	22.43	62.07	34.9	17.19	1.39	0.37	0.92	0
		100.1	93.58	99.41	31.64	69.74	36.64	1.56	4.73	4.4	52.51	44.19	33.46	19.82	31.78	15.54	32.28	22.99	61.64	31.26	16.71	1.39	0.35	0.94	0
		100.1	93.86	101.33	32.86	67.89	39.42	1.41	4.28	4.67	52.86	44.75	34.07	19.94	35.5	16.59	29.45	22.68	62.66	33.42	16.88	1.4	0.36	0.84	0
		100.2	95.08	101.72	31.04	63.72	41.32	1.5	4.33	4.29	50.6	45.74	33.3	22.15	35.93	14.78	32.18	25.34	58.3	31.88	15.46	1.4	0.35	0.89	0
		100.2	93.03	99.64	31.5	68.94	41.52	1.6	4.46	4.7	50.22	45.41	33.31	21.88	32.33	15.44	29.84	23.99	62.75	32.56	16.25	1.39	0.37	1.19	0
		100.3	95.87	100.34	29.73	65.63	37.23	1.53	4.43	4.69	48.79	41.34	32.62	21.89	32.27	15.06	28.78	24.44	63.32	34.69	17.29	1.42	0.37	0.89	0
		100.3	92.86	101.48	30.11	63.71	39.55	1.42	4.4	4.23	50.79	40.97	32.84	20.46	35.84	15.08	31.04	22.82	61.73	32.34	16.76	1.42	0.38	1.03	0
		100.3	93.12	100.36	31.64	63.39	39.75	1.45	4.24	4.67	50.55	41.49	36.89	20.95	35.16	16.14	31.61	22.22	62.39	34.83	16.67	1.4	0.36	0.89	0
		100.3	93.52	99.8	32.13	66.84	41.27	1.53	4.64	4.3	48.89	41.82	32.6	20.43	34.13	14.84	31.46	22.53	62.34	32.44	17.21	1.41	0.37	0.96	0
		100.3	95.06	100.24	30.16	66.66	39.77	1.57	4.29	4.36	48.23	43.94	36.68	22.04	34.52	14.85	31.31	22.17	60.02	34	15.86	1.4	0.38	0.86	0
		100.4	94.93	100.17	32.7	63.55	39.04	1.48	4.49	4.7	50.91	45.95	36.33	20	35.42	16.86	28.6	22.34	62.02	32.61	15.44	1.39	0.38	1.12	0
		100.5	93.04	101.07	30.24	68.17	39.94	1.52	4.2	4.26	46.93	44.41	35.47	19.59	34.58	14.73	29.42	22.61	63.05	35.23	16.61	1.42	0.36	0.83	0
		100.6	93.96	101.39	30.18	66	40.94	1.54	4.51	4.67	50.66	42.48	33.28	20.38	31.79	15.39	29.99	24.97	62.16	31.29	17.18	1.42	0.36	0.82	0
		100.6	93.2	99.92	31.84	66.05	36.66	1.46	4.2	4.31	47.22	44.98	34.12	22.04	31.95	14.83	30.36	22.06	56.87	31.29	16.53	1.41	0.36	1.04	0
		100.7	93.95	100.51	29.44	64.76	36.63	1.6	4.7	4.67	47.49	43.08	34.28	22.42	34.06	16.15	30.6	23.08	61.53	31.87	15.55	1.41	0.39	1.25	0
		100.7	94.44	101.54	31.23	64.33	41.21	1.54	4.32	4.59	49.8	42.14	35.42	19.92	31.96	15.47	29.82	23.37	58.03	33.5	17.27	1.41	0.37	1.1	0
		100.8	95.16	101.36	32.57	69.06	40.79	1.44	4.54	4.15	51.37	44.77	35.11	22.21	31.89	15.1	29.11	24.39	59.23	33.09	16.41	1.42	0.36	0.97	0
		100.8	93.45	101.73	31.68	69.92	41.16	1.52	4.19	4.49	47.04	42.78	34.68	20.61	32.65	16.41	29.12	23.29	59.12	33.12	16.96	1.39	0.35	1.18	0
		100.8	95.37	101.03	30.18	69.8	38.39	1.55	4.55	4.67	46.9	44.69	34.2	20.17	34.62	16.18	31.85	22.36	58.64	31.79	16.16	1.4	0.38	1.22	0
		100.8	94.86	100.79	32.86	67.75	39.36	1.52	4.26	4.25	50.18	41.62	35.31	20.17	32.9	16.57	28.81	24.06	58.3	31.31	16.61	1.4	0.36	0.85	0
		100.8	96.64	99.93	32.55	63.64	40.48	1.54	4.58	4.14	48.96	40.68	36.35	20.35	32.54	15.03	31.87	22.08	55.68	33.24	16.28	1.42	0.38	1.22	0
		100.8	96.06	102.32	29.45	66.18	38.66	1.49	4.49	4.26	47.82	44.77	35.71	21.13	31.69	14.99	31.36	23.81	56.49	34.63	15.45	1.42	0.36	1	0
		100.9	94.93	101.23	31.4	64.4	41.87	1.46	4.25	4.41	47.56	41.47	32.58	19.66	34.16	15.08	31.01	25.09	61.6	31.59	15.35	1.42	0.36	1.06	0
		100.9	94.04	101.52	32.19	65.18	38.35	1.59	4.51	4.24	48.79	42.66	36.32	19.78	32.67	15.41	31.66	22.35	63.97	34.47	15.63	1.41	0.38	0.81	0
		101	94.97	102.68	32.15	64.94	39.78	1.51	4.58	4.46	51.28	44.68	34.36	19.67	33.41	16.26	28.46	22.92	59.83	35.51	17.32	1.42	0.38	0.96	0
		100.1	94.36	101.57	32.45	67.22	43.26	1.73	5.26	4.77	54.13	46.45	42.19	25.13	36.34	17.59	36.94	27.65	74.12	35.06	15.66	1.4	0.36	0.95	0
		100.2	93.94	100.81	34.08	71.82	41.93	1.59	4.79	5.22	60.76	45.6	37.45	23.08	41.22	18.66	32.62	25.09	62.56	38.15	16.39	1.38	0.35	1.15	0
		100.4	94.74	100.65	34.67	66.9	41.39	1.87	5.34	5.26	60.22	49.28	43.56	20.83	42.02	18.34	35.84	27.5	59.06	32.74	16.38	1.4	0.37	1.1	0
		100.6	95.5	102.06	34.98	80.45	40.83	1.58	5.35	5.03	58.3	44.61	41	20.41	37.29	18.5	32.54	24.3	66.26	32.65	18.49	1.39	0.37	0.88	0
		100.7	95	101.36	37.84	79.89	39.47	1.73	5.36	5.21	52.16	43.59	35.03	20.31	39.85	18.4	37.05	23.3	66.57	41.36	20.22	1.41	0.39	0.86	0
		100.7	95.39	100.3	34.47	80.01	43.95	1.45	5.5	5.33	52.09	53.1	33.6	25.64	34.29	15.63	30.97	23.33	66.67	36.91	19.71	1.4	0.36	0.93	0
		100.8	93.55	100.29	32.11	65.93	42.57	1.46	5.36	4.46	52.55	51.67	39.25	20.81	35.78	15.31	29.63	23.99	68.91	40.45	17.94	1.4	0.37	0.84	0
		100.8	96.04	101.94	30.51	68.06	37.7	1.74	5.12	4.48	61.24	53.12	42.58	24.83	36.13	15.25	32.7	25.58	65.96	39.11	16.1	1.41	0.36	1.16	0
		100.9	96.7	101.32	31.16	67.53	39.92	1.76	5.07	5.18	56.62	43.35	40.47	22.57	37.01	19.11	32.84	23.46	58.97	34.37	18.85	1.41	0.36	0.9	0
		101.1	94.34	102.67	32.24	69.09	47.14	1.69	5.2	4.29	54.97	45.33	36.2	26.21	34.36	17.74	31.95	25.72	73.94	35.25	18.86	1.43	0.36	0.84	0
		101.3	96.17	100.92	38.77	77.35	48.77	1.49	4.7	4.39	56.23	48.77	34.61	23.84	37.13	18.36	36.9	22.81	72.59	34.34	15.87	1.43	0.37	1.2	0
		101.3	97.02	102.89	31.79	65.08	43.94	1.51	5.39	5.43	49.73	46.85	40.1	20.44	32.81	15.83	37.14	27.22	62.04	38.47	17.26	1.41	0.38	1.12	0
		101.6	94.52	102.85	34.82	70.22	45.76	1.6	4.68	5.11	51.23	41.46	40.04	25.8	41.48	17.75	32.61	29.46	74.15	36.74	16.99	1.42	0.39	0.88	0
		101.7	94.91	101.35	31.4	71.62	37.75	1.85	4.45	4.99	49.19	47.01	42.42	24	34.56	17.65	35.24	22.9	58.28	36.03	17.52	1.44	0.38	1.14	0
		101.9	95.19	103	34.64	66.08	47.73	1.53	5.46	5.29	48.13	41.66	38.74	22.87	35.16	18.97	33.43	26.05	70.04	36.68	16.21	1.43	0.37	0.96	0
		102.1	97.77	103.65	35.61	73.28	43.93	1.5	4.77	4.94	58.31	45.89	41.96	22.73	39.87	17.57	36.24	27.99	70.87	40	16.31	1.42	0.39	1.18	0
		102.2	97.19	102.39	31.96	71.32	45.92	1.55	4.91	4.23	60.62	52.54	40.3	21.4	40.03	18.26	37	26.3	68.01	37.85	16.74	1.43	0.37	1.07	0
		102.3	96.47	102.45	35.4	66.34	41.29	1.73	5.23	4.88	55.86	50.59	36.8	22.77	35.5	15.8	30.94	28.02	66.03	36.99	17.3	1.42	0.36	1.09	0
		102.4	96.04	101.88	33.4	70.25	44.11	1.82	5.03	4.63	54.11	41.69	35.73	25.46	36.48	15.93	31.82	25.01	73.45	39.45	17.22	1.42	0.39	0.86	0
		102.4	95.99	101.5	38.8	75.25	45	1.87	4.73	4.51	55.42	41.96	34.46	26.18	34.09	17.85	37.66	27.28	69.51	41.22	19.94	1.42	0.36	0.9	0
		102.8	96.69	104.28	30.87	66.57	41.23	1.85	4.44	5.21	50.97	42.9	33.59	20.37	32.64	19.62	31.28	28.13	70.51	38.69	17.36	1.44	0.39	1.17	0
		102.9	95.63	104.54	30.18	66.52	44.42	1.67	4.58	4.34	52.59	49	43.11	22.41	36.73	18.67	35.8	26.03	61.94	36.93	18.36	1.42	0.36	0.88	0
		102.9	96.48	104.3	38.27	79.59	38.15	1.81	5.38	4.38	49.74	53.32	36.6	21.05	37.25	18.29	29.82	25.13	74.71	39.59	19.38	1.42	0.38	0.94	0
		103	95.59	103.79	30.26	65.39	44.74	1.72	4.47	4.6	60.74	43.69	33.63	20.29	35.69	16.95	32.36	29.36	67.35	33.96	19.57	1.43	0.38	0.89	0
		103	97.7	104.56	29.98	76.05	45.9	1.65	5.27	4.7	61.83	50.85	39.79	20.49	33.84	18.72	30.39	27.6	66.35	38.52	15.98	1.45	0.38	1.11	0
		103	98.71	102.98	30.52	74.53	41.78	1.55	5.22	5.02	61.89	43.52	34.54	22.79	37.99	18.76	32.82	26.13	70.19	41.71	19.99	1.45	0.38	0.99	0
		103.2	97.46	103.73	34.12	66.44	38.46	1.7	5.35	5.37	48.76	44.4	40.03	21.33	34.07	16.07	29.09	22.78	64.89	35.35	16.55	1.45	0.39	0.87	0
		103.3	96.58	103.21	37.38	80.92	43.75	1.52	5.04	5.36	60.39	46.95	35.91	23.88	41.29	16.35	30.79	27.08	73.52	39.62	20.15	1.44	0.4	1.23	0
		103.3	96.17	102.93	37.06	79.79	43.41	1.44	5.11	4.41	49.08	44.48	36.72	22.41	34.83	17.77	36.11	27.62	66.6	40.95	17.47	1.45	0.38	1.13	0
		103.5	97.49	103.56	35.99	74.77	48.85	1.44	5.26	5.48	51.94	51.56	36.18	21.45	40.39	15.79	33.83	24.8	72.41	41.17	16.49	1.46	0.37	1.21	0
		103.5	98.54	103.99	33.81	73.97	40.7	1.49	4.79	4.27	61.53	41.51	33.68	21.39	35	15.23	36.2	23.34	71.22	32.37	20.09	1.45	0.36	0.94	0
		103.9	97.2	103.37	36.68	80.24	47.13	1.69	5.58	4.91	51.99	42.64	39.68	21.79	34.86	16.99	37.67	26.77	64.39	37.48	17.23	1.46	0.37	1.02	0
		104	95.47	104.15	34.19	67.84	44.79	1.61	5.33	5.44	60	42.04	42.41	21.17	34.01	18.03	29.37	25.03	58.72	40.58	16.32	1.45	0.37	1.26	0
		104.1	95.95	104.48	32	64.63	46.46	1.51	4.9	4.54	53.9	51.98	35.17	23.52	37.92	19.53	36.69	23.86	61.92	34.67	16.56	1.46	0.38	0.87	0
		104.1	95.84	104.84	34.13	75.47	40.37	1.57	4.69	4.62	53.57	50.24	35.9	21.79	41.27	17.63	37.46	24.8	72.37	40.03	17.15	1.46	0.37	1.16	0
		104.2	96.21	105.3	36.35	69.33	43.09	1.53	4.77	5.22	60.96	49.53	36.35	23.61	37.76	17.58	35.48	25.09	72.48	38.79	16.37	1.45	0.39	1.03	0
		104.2	96.07	103.65	33.13	71.27	44.59	1.81	4.62	5.32	61.79	44.7	35.36	22.29	38.17	18.1	32.85	28.68	60.9	38.79	15.96	1.46	0.38	1.13	0
		104.3	97.47	105.85	36.23	66.45	39.1	1.78	5.28	4.65	48.18	42.89	42.71	21.13	38.14	16.03	35.16	27.88	63.28	37.19	15.7	1.47	0.4	1.18	0
		104.3	96.51	104.28	34.97	81.68	45.62	1.8	4.72	4.83	48.38	50.54	36.25	20.22	38.72	19.31	35.1	29.02	70.12	38.63	18.21	1.47	0.4	0.9	0
		104.6	97.27	105.24	32.15	75.54	38.55	1.67	4.94	5.27	55.66	47.06	42.05	24.8	41.63	17.43	29.53	27	67.17	34.55	19.59	1.45	0.37	1.13	0
		104.7	97.8	105.42	31.25	78.73	45	1.7	4.35	5.15	58.93	44.36	36.79	21.14	34.46	16.74	33.01	29.34	72.07	40.07	20	1.47	0.38	0.93	0
		105.3	97.02	104.41	36.4	82.18	44.99	1.59	4.71	5.04	52.91	49.51	34.6	21.64	34.15	16.3	37.55	27.82	64.99	36.71	15.58	1.47	0.37	1.16	0
		105.3	97.21	105.58	31.46	76.43	44.53	1.7	4.75	5.39	57.12	41.98	37.32	21.36	38.06	17.9	30.82	25.33	74.15	34.09	20.13	1.46	0.39	0.94	0
		105.6	97.77	105.73	35.73	64.08	37.76	1.74	4.36	4.4	50.28	45.63	38.12	22.67	38.9	19.34	31.43	29.48	61	40.47	16.62	1.48	0.37	1.2	0
		105.7	97.26	106.82	30.74	67.39	45.95	1.62	4.84	5.31	51.62	44	41.05	25.06	40.39	15.78	33.9	24.58	74.14	38.71	18.67	1.48	0.39	1.1	0
		105.7	98.24	106.73	36.65	67.13	40.58	1.6	5.41	5.02	53.52	44.4	43.61	20.91	35.07	17.94	32.72	26.05	73.77	39.29	19.95	1.47	0.4	1.28	0
		105.8	99.63	105.21	33.14	66.65	40.68	1.64	4.94	4.53	51.45	51.65	35.68	22.45	37.07	15.56	35.68	29.26	69.49	34.85	16.08	1.48	0.39	0.99	0
		105.9	98.82	105.01	30.43	64.47	43.77	1.52	5.28	4.35	48.88	44.45	43.24	20.24	33.74	18.71	33.88	25.83	59.75	34.98	18.31	1.49	0.39	1.17	0
		106	98.97	106.84	30.69	72.17	46.48	1.59	5.51	4.99	52.06	52.97	37.15	20.59	36.74	18.39	31.89	23.15	68.81	34.53	17.65	1.5	0.39	1.13	0
		106.2	98.47	107.17	31.53	75.51	41.63	1.86	4.47	4.84	47.89	42.86	39.22	25.47	38	17.16	35.06	26.78	64.65	36.14	16.38	1.49	0.38	0.88	0
		106.2	98.33	106.32	37.99	75.29	43.16	1.79	4.66	5.43	52.06	41.86	43.44	23.14	41.3	17.18	36.04	24.89	70.76	38.53	19.69	1.48	0.4	0.97	0
		106.2	98.59	105.34	35.84	67.93	48.45	1.63	4.92	5	61.66	51.84	33.73	23.91	33.55	15.57	29.33	23.7	64.62	33.37	19.67	1.5	0.38	0.97	0
		106.2	99.11	105.38	37.3	64.09	46.2	1.57	5.06	5.49	57.35	44.81	40.36	26.05	37.1	18.17	34.36	28.56	62.47	39.02	19.84	1.49	0.39	0.97	0
		106.4	100.37	107.51	34.26	81.49	47.75	1.67	4.51	5.15	48.14	48.18	40.33	25.76	39	16.22	32.91	26.68	69.89	38.97	19.22	1.47	0.41	1.06	0
		106.5	97.91	106.24	33.54	76.86	45.28	1.52	5.24	4.25	58.19	43.05	38.86	23.25	36.09	19.54	29.81	24.23	72.27	37.96	18.56	1.48	0.4	1.1	0
		106.5	98.44	107.11	36.49	77.51	45.27	1.63	4.81	5.13	48.95	43.03	35.92	22.87	40.41	17.43	37.41	28.76	74.42	35.52	19.26	1.5	0.38	1.26	0
		106.9	100.86	107.46	37.83	76.64	46.67	1.7	5.53	4.71	51.32	52.52	42.87	22.18	40.27	15.79	34.42	22.81	68.3	32.75	16.52	1.5	0.4	0.91	0
		106.9	99.33	106.65	32.63	67.49	43.81	1.57	4.68	5.3	53.55	46.99	35.46	24.44	34.3	17.15	33.55	26.04	59.72	37.38	18.43	1.48	0.38	1.18	0
		107.4	99.71	107.01	34.21	66.66	48.72	1.83	4.9	4.96	49.53	49.06	38.52	20.48	36.47	18.76	36.34	23.33	67.58	37.01	17.22	1.5	0.38	1.12	0
		107.4	99.97	108.86	37.3	81.84	42.16	1.62	4.38	4.53	53.05	43	36.29	23.46	32.82	19.26	35.78	28.37	70.35	41.72	19.75	1.51	0.39	1.25	0
		107.57	99.11	108.68	37.92	65.1	41.52	1.76	4.63	4.27	49.63	51.47	35.33	23.06	41.27	17.28	29.59	25.69	73.75	39.54	16.19	1.49	0.39	1.22	0
		107.64	99.91	107.29	35.38	74.25	46.9	1.48	4.74	5.39	52.38	42.05	34.67	21.79	41.01	15.42	29.19	26.16	65.92	34.13	17.77	1.5	0.41	1.32	0
		107.76	99.45	108.12	37.17	72.65	42.2	1.76	5.47	4.8	60.12	49.92	37.8	20.29	39.69	17.72	36	27.23	68.96	37.22	18.88	1.52	0.4	1.06	0
		107.85	100.92	108.93	37.52	67.02	40.1	1.58	5.07	4.77	55.56	46.74	43.48	22.45	35.13	15.48	31.48	23.41	70.27	39.28	19.11	1.5	0.4	1.26	0
		107.95	99.97	108.1	35.61	71.09	40.53	1.83	5.07	5.23	58.28	42.1	38.45	24.96	32.56	18.52	31.7	23.42	60.06	35.3	16.93	1.52	0.4	1.28	0
		108.23	100.87	109.12	37.12	79.2	39.44	1.79	5.24	4.5	52.55	47.57	40.44	25.72	39.86	16.61	33.21	26.83	62.57	41.5	16.63	1.52	0.41	1.24	0
		108.25	102.08	109.33	32.56	72	48.42	1.66	4.68	5.33	50.29	52.21	42.56	21.45	36.16	15.2	32.79	26.74	57.54	34.14	16.63	1.52	0.39	1.32	0
		109.71	102.62	109.78	32.21	63.26	38.4	1.81	4.55	5.24	59.18	41.92	40.48	24.36	41.06	15.81	35.52	26.83	73.14	36.03	19.59	1.53	0.4	1.13	0
		109.99	104.01	110.61	29.95	77.42	44.71	1.68	5.54	4.57	51.79	45.44	35.21	23.73	35.11	17.44	36.18	28	69.33	39.19	16.77	1.53	0.41	1.08	0
		110	101.3	109.76	30.91	76.39	46.65	1.71	4.62	4.74	55.56	47.08	37.3	20.92	35.2	16.29	31.15	25.97	68.45	38.36	17.39	1.54	0.39	1.24	0
		110.13	104.18	110.42	38.7	73.95	39.22	1.74	5.05	5.12	54.2	42.29	35.01	20.43	36.75	15.58	33.69	28.12	61.09	34.29	16.28	1.54	0.4	1.05	0
		110.32	101.92	110.36	36.88	72.75	45.44	1.83	5.27	4.49	50.33	45.43	38.16	24.42	36.35	17.15	36.91	24.73	65.04	37.45	17.34	1.55	0.41	0.95	0
		110.35	102.49	109.6	37.89	81.21	48.05	1.81	5.55	4.48	56.92	51.2	36.33	23.6	32.83	16.07	32.68	28.05	65.89	32.85	16.85	1.56	0.39	1.06	0
		110.79	102.73	110.92	31.44	79.99	44.91	1.57	5.61	5.31	49.57	47.42	34.95	24.34	39.91	15.31	37.86	25.15	72.38	34.16	17.38	1.54	0.39	1.09	0
		110.92	104.14	111.08	38.34	65.45	46.85	1.78	5.26	5.42	60.89	46.7	35.37	24.45	33.01	18.92	33.9	24.42	70.11	36.25	19.51	1.55	0.41	1.26	0
		111	104.37	112.35	37.1	77.4	46.4	1.84	5.11	4.52	56.19	48.21	42.78	23.93	40.01	19.17	37.35	28.39	65.01	40.61	16.2	1.54	0.4	1.23	0
		111.02	103.45	110.65	32.82	71.14	37.68	1.62	5.21	5.24	60.34	47.37	39.08	26.1	35.04	18.58	31.51	23.17	69.71	40.65	16.99	1.56	0.4	1.35	0
		111.27	102.89	110.97	35.59	75.62	47.81	1.8	5.23	5.22	59.68	42.01	34.81	23.68	40.25	15.27	29.59	23.56	67.81	34.18	18.78	1.57	0.4	1.36	0
		111.37	104.95	112.66	36.88	77.72	43.72	1.55	5.09	5.38	62.21	52.8	36.04	22.89	36.08	15.5	34.62	23.6	69.8	37.81	16.06	1.55	0.42	0.95	0
		111.4	105.08	112.2	31.83	74.67	39.02	1.58	4.74	4.6	56.4	44.17	40.37	20.91	36.3	15.56	34.87	28.85	69.81	34.26	19.14	1.57	0.43	1.12	0
		111.44	105.3	110.68	31.09	77.99	48.51	1.58	4.44	5.26	49.71	50.81	39.57	26.26	35.46	16.8	37.07	27.29	68.99	41.36	18.17	1.55	0.4	0.95	0
		111.59	105.65	112.56	37.54	72.04	44.29	1.81	5.54	4.83	57.32	46.11	41.88	25.32	38.85	16.05	30.34	26.96	61.69	39.23	16.48	1.55	0.41	1.01	0
		111.74	103.72	110.87	31.31	73.2	39.05	1.85	5.37	4.59	48.64	45.08	40.9	21.16	38.69	16.87	32.31	23.89	63.2	41.49	19.46	1.56	0.42	1.04	0
		111.85	105.47	110.88	37.91	63.72	40.81	1.56	4.38	5.46	54.29	53.1	35	23.44	39.2	17.7	31.38	28.71	58.07	37.6	17.84	1.58	0.4	1.24	0
		112.16	103.92	113.79	33.23	79.93	38.85	1.81	4.97	5.21	51.28	53.07	34.56	24.01	33.44	17.52	29.36	29.2	69.09	33.61	16.07	1.55	0.4	1.02	0
		112.41	106.02	111.97	31.79	76.11	38.1	1.51	5.58	4.43	60.18	42.28	39.38	26.26	34.56	18.29	33.38	23.86	69.93	34.97	17.86	1.58	0.41	1.23	0
		113.17	105.85	113.35	30.52	72.66	40.13	1.54	4.88	4.7	57.41	49.16	34.85	22.33	34.95	18.88	34.69	24.57	62.85	33.8	19.45	1.58	0.42	1.12	0
		113.21	104.63	113.63	36.81	76.4	44.93	1.59	5.21	4.91	49.87	53.54	39.93	22.97	35.13	16.21	33.76	25.82	61.85	38.36	16.74	1.57	0.41	1.23	0
		113.3	106.45	114.5	34.11	71.75	39.73	1.49	5.32	5	59.54	53.26	42.98	21.94	35.21	17.81	35.3	24.26	59.93	32.19	15.81	1.59	0.43	1.13	0
		113.37	106.8	112.61	32.33	66.55	37.79	1.58	5.46	5.03	61.84	50.71	40.59	24.03	33.36	17.11	37.49	24.22	67.56	36.98	19.91	1.58	0.41	1.03	0
		113.47	107	114.92	38.29	71.7	42.38	1.7	4.52	5.05	58.74	52.09	35.72	24.84	41.08	18.27	35.49	23.37	58.27	39.94	20.2	1.6	0.42	1.01	0
		113.53	106.53	114.88	30.12	74.68	44.4	1.51	4.35	5.1	56.03	53.03	38.41	22.55	32.93	15.98	37.36	24.42	64.75	37.69	19.59	1.58	0.41	0.98	0
		113.58	105.42	113.32	33.18	76.71	42.58	1.71	4.87	4.57	53.42	53.35	36.32	22.97	35.61	17.09	33.29	25.67	70.25	35.32	18.37	1.59	0.41	1.21	0
		113.6	106.62	115.17	37.66	82.18	46.79	1.51	5.22	5.31	48	49.51	39.49	20.54	39.93	18.68	30.48	29.35	60.27	38.42	19.16	1.6	0.43	1.33	0
		113.69	106.83	113.86	36.41	71.8	42.11	1.57	4.82	4.77	58.77	47.69	34.8	20.27	38.14	15.54	33.14	27.64	70.22	32.62	17.33	1.59	0.41	1.1	0
		113.95	106.7	114.04	31.6	77.06	44.88	1.45	5.44	4.32	57.03	45.98	35.51	22.34	35.82	16.03	35.9	25.71	73.4	36.88	15.86	1.59	0.44	1.05	0
		114.12	107.44	115.53	35.53	82.23	46.13	1.87	5.34	4.71	55.88	53.48	41.15	21.97	38.77	15.39	33.27	27.43	65.61	40.36	16.54	1.58	0.41	1.06	0
		114.25	105.65	115.47	31.85	81.23	42.06	1.7	4.95	4.97	56.09	45.06	42.45	25.81	39.29	15.61	34.23	29.39	69.23	35.6	17	1.59	0.42	1.17	0
		114.3	108.2	114.62	30.97	73.1	37.99	1.85	4.79	4.89	58.04	44.37	38.56	21.5	41.46	17.85	31.83	24.3	66.06	35.4	17.37	1.61	0.41	1	0
		114.33	106.46	115.03	32.11	75.1	43.34	1.65	4.44	5.49	53.61	46.41	39.18	23.4	32.88	17.02	31.36	25.27	67.67	33.63	19.03	1.6	0.42	0.97	0
		115.16	108.13	115.9	38.87	65.24	48.5	1.52	4.92	4.83	51.56	52.47	33.86	26.28	41.13	16.24	30.88	26.82	68.15	35.05	18.35	1.62	0.44	1.34	0
		115.16	106.96	116.24	35.6	68.65	44.35	1.62	5	5.29	53.57	44.33	38.05	20.96	34.09	15.7	31.97	24.06	58.82	38.07	16.19	1.59	0.44	1.19	0
		115.37	108.43	114.47	30.88	75.67	44.05	1.78	5.4	4.71	57.73	46.1	38.97	24.51	38.85	17.68	33.68	26.6	71.68	39.15	16.22	1.62	0.43	1.21	0
		115.37	107.02	115.36	32.15	69.67	39.91	1.77	4.97	4.54	60.71	42.04	38	24.85	37.51	19.21	35.55	25.37	69.86	39.52	17.85	1.61	0.42	1.14	0
		115.57	107.06	115.1	33.79	70.9	46.03	1.56	5	4.68	49.36	48.21	36.99	23.51	40.73	17.54	29.27	27.69	70.66	36.84	18.28	1.61	0.44	1.24	0
		115.85	108.34	116.36	33.49	66.9	48.99	1.65	4.68	5.39	49.19	45.03	43.42	20.3	35.48	17.16	33.65	22.79	74.41	35.35	17.29	1.63	0.42	1.16	0
		116.38	109.56	116.76	36.31	75.81	39.09	1.57	5.43	4.57	54.25	41.89	34.7	20.77	38.74	17.83	29.71	23.13	69.17	40.31	18.46	1.62	0.44	1.34	0
		116.48	109.08	115.56	36.62	79.09	38.26	1.6	4.86	5.4	49.91	53.13	38.46	23.71	32.33	17.22	29.21	29.23	72.19	40.36	19.78	1.62	0.43	1.29	0
		116.59	109.18	116.34	32.38	64.23	40.43	1.59	5.05	4.52	50.25	46.02	38.91	25.62	35.56	18.88	32.24	23.51	61.94	35.31	20.22	1.62	0.45	1.2	0
		116.61	110.23	118.05	37.37	64.32	38.67	1.76	4.39	4.63	54.61	42.62	39.41	24.28	35.78	16.21	37.29	23.13	74.31	40.94	15.74	1.62	0.43	1.41	0
		116.92	109.95	118.34	33.38	74.64	42.65	1.82	5.38	4.85	60.06	47.76	33.82	22.11	35.65	19.14	30.49	23.45	60.13	40.47	16.76	1.65	0.43	1.16	0
		117.02	110.14	118.4	38.32	86.86	52.26	1.98	5.42	5.5	58.07	51.15	41.46	26.21	39.66	19.32	40.49	29.07	77.97	39.81	21.67	1.64	0.43	1.24	0
		117.51	108.84	117.85	37.51	80.04	47.82	1.91	5.22	5.51	66.66	56.29	44.45	24.22	42.14	18.56	35.88	27.27	79.13	42.97	20.27	1.66	0.43	1.22	0
		117.89	111.52	119.34	38.42	83.45	48.13	1.95	5.56	5.51	66.59	49.87	44.85	27.48	43.34	20.63	40.16	30.02	76.78	38.57	21.42	1.65	0.44	0.99	0
		118.21	110.41	118.62	40.75	75.77	47.04	1.74	5.67	5.16	58.32	56.42	43.27	28.04	40.6	19.04	37.37	31.11	79.37	42.03	19.72	1.64	0.43	1.33	0
		118.44	111.09	119.51	37.42	79.23	49.08	1.81	5.5	5.5	65.86	51.45	43.75	24.91	43.73	18.54	40.04	31.3	73.92	39.42	21.06	1.64	0.43	0.99	0
		118.45	110.26	118.38	37.21	86.26	52.5	1.99	5.45	5.21	57.35	49.88	45.44	25.56	42.48	19.83	39.91	30.87	72.78	40.15	18.84	1.66	0.44	1.19	0
		118.61	112.33	118.89	39.81	75.7	51.06	1.91	5.91	5.08	60.19	49.73	40.93	27.56	44.86	18.42	37.96	29.37	70.81	44.69	19.65	1.64	0.43	1.06	0
		118.65	112.55	119.33	39.48	84.44	48.36	1.87	6.02	5.39	60.57	52.5	40.53	25	40.33	19.39	35.29	27.37	79.55	42	19.65	1.64	0.45	1.28	0
		118.87	111.69	119.8	36.31	81.88	52.38	1.9	5.89	5.76	57.83	49.85	45.71	27.14	39.06	19.97	36.13	31.23	69.73	40.14	19.09	1.66	0.43	1.41	0
		119.18	111.66	120.41	36.52	88.1	51.27	1.89	5.83	5.53	62.33	50.7	43.88	26.38	41.21	18.63	36.51	28.44	79.58	41.06	19.21	1.66	0.42	1.38	0
		119.19	112.37	120.46	38.41	83.12	49.95	1.82	5.82	5.73	66.68	54.67	40.56	26.47	42.8	20.77	38.34	29.47	70.12	39.36	21.34	1.65	0.45	1.43	0
		119.23	112.3	120.15	38.94	85.7	49.31	1.75	5.66	5.89	62.66	54.04	42.09	24.33	40.65	18.55	39.44	30.9	69.25	38.93	21.64	1.68	0.43	1.22	0
		119.26	110.61	120.8	39.6	86.44	47.55	1.9	5.7	5.71	58.17	52.33	44.61	24.49	40.75	20.06	39.31	27.28	72.03	39.8	21.33	1.68	0.42	1.06	0
		120.65	113.18	120.68	41.15	75.67	46.14	1.87	5.9	5.31	62.06	50.64	42.49	25.74	43.11	19.6	38.88	30.88	71.43	39.46	19.23	1.7	0.45	1.15	0
		120.69	113.88	122.27	40.06	86.26	52.07	1.86	5.86	5.18	58.71	57.49	44.89	24.57	44.9	18.5	36.91	28.33	74.55	39.56	21.39	1.7	0.45	1.15	0
		120.77	113.84	122.27	40.45	78.82	47.2	1.91	6.02	5.5	57.83	52.49	42.36	26.49	41.56	18.55	36.86	31.71	75.04	43.47	21.69	1.68	0.46	1.02	0
		121	112.13	121.24	38.38	84.26	51.33	1.82	5.33	5.6	63.95	51.19	46.55	26.9	43.34	20.43	37.01	28.71	79.28	42.75	21.37	1.69	0.45	1.18	0
		121.39	112.11	121.5	37.13	78.9	48.77	1.93	5.72	5.54	63.98	55.51	41.46	25.38	42.98	19.05	36.83	29.76	69.73	43.57	19.1	1.7	0.45	1.28	0
		121.41	113.43	122.4	38.53	84.63	48.54	1.8	5.3	5.84	65.3	49.69	40.3	25.28	43.78	19.86	35.99	28.09	69.26	38.95	20.97	1.7	0.46	1.28	0
		121.51	111.51	121.12	38.78	78.12	46.49	1.9	5.57	5.07	66.55	56.97	41.68	27.55	39.16	18.54	36.8	28.39	74.09	42.69	19.27	1.69	0.43	1.44	0
		121.53	112.1	122.77	40.13	87.56	47.05	1.84	5.9	5.88	61.66	52.17	43.7	27.73	40.47	20.72	35.21	30.14	78.57	38.91	19.92	1.71	0.44	1.18	0
		121.78	111.82	123.28	39.16	86.64	52.49	1.81	5.45	5.5	59.84	54.19	45.62	27.38	42.28	20.68	40.14	30.19	80.09	41.52	21.27	1.69	0.45	1.28	0
		121.92	111.72	121.18	38.75	76.85	50.76	1.82	5.42	5.72	61.46	54.54	43.26	24.98	41.12	18.88	37.05	29.93	71.41	41.01	20.86	1.72	0.44	1.08	0
		122.06	110.81	121.38	38.62	80.43	51.53	1.8	5.39	5.7	57.51	56.61	40.54	25.52	41.66	21.13	39.18	30.45	79.19	39.2	20.74	1.69	0.45	1.1	0
		122.14	113.81	121.86	39.34	84.75	52.3	1.93	5.31	5.85	58.9	53.88	43.49	25.74	44.82	18.2	38.9	28.02	74.14	38.68	21.7	1.71	0.47	1.42	0
		122.22	112.04	122.16	38.76	85.72	51.24	1.89	5.31	5.51	62.37	49.74	46.12	26.39	41.26	20.86	36.87	29.36	72.95	41	20.09	1.69	0.44	1.16	0
		122.97	113.33	122.74	36.54	76.05	51.31	1.86	5.77	5.23	66.04	51.64	43.1	27.92	38.83	19.01	39.43	28.86	68.99	42.18	19.35	1.73	0.47	1.17	0
		123.2	112.76	122.34	36.67	78.23	48.47	1.89	5.44	5.11	63.21	51.23	40.38	24.31	42.3	20.77	36.42	29.78	74.01	39.83	19.07	1.72	0.44	1.05	0
		123.55	113.14	123.31	41.59	83.89	51.04	1.97	5.38	5.71	62.32	54.23	44.77	27.14	41.59	20.9	39.54	29.72	77.55	39.1	18.92	1.71	0.45	1.4	0
		123.56	111.96	125.19	36.88	76.56	46.21	2.01	5.58	5.78	58.52	54.36	41.02	25.12	43.9	19.79	40.48	28.68	74.17	42.55	20.16	1.74	0.44	1.2	0
		124.27	112.73	124.01	37.3	79.16	49.56	1.84	6	5.08	58.24	51.7	44.6	28.03	41.83	18.85	39.79	29.62	71.44	41.06	20.02	1.75	0.45	1.14	0
		124.63	116.63	123.89	37.61	85.42	49.75	1.8	5.2	5.51	60.89	56.2	40.7	27.6	41.81	18.34	37.31	27.8	70.08	44.83	19.48	1.73	0.46	1.14	0
		124.66	113.08	124.79	41.4	85.13	46.26	1.96	5.36	5.33	59.62	49.82	44.11	27.65	41.8	20.58	37.04	29.2	73.5	39.45	19.64	1.75	0.45	1.36	0
		124.82	113.44	125.91	40.03	80.41	51.07	1.85	5.6	5.74	62.82	50.54	43.92	26.69	39.11	20.88	37.07	27.33	71.76	42.43	20.17	1.74	0.46	1.28	0
		124.99	114.92	124.34	41.79	84.04	47.8	1.89	5.46	5.61	66.72	57.53	44.68	25.86	43.77	20.57	35.87	27.42	75.44	43.75	19.72	1.76	0.46	1.13	0
		125.07	116.56	124.2	41.05	84.6	47.59	2	5.37	5.43	65.82	53.82	40.87	25.73	44.16	20.27	36.88	29.33	76.36	44.09	19.32	1.74	0.47	1.2	0
		125.3	114.38	124.55	39.64	81.98	48.89	1.87	5.61	5.13	59.98	50.31	43.48	24.61	40.84	19.14	36.76	31.09	78.9	44.37	19.48	1.76	0.48	1.18	0
		125.35	115.44	126.64	39.65	77.93	47.74	1.88	5.22	5.36	59.66	52.62	41.95	25.96	44.23	19.97	36.75	27.38	78.63	41.03	21.29	1.74	0.47	1.16	0
		125.41	114.91	125.95	36.92	87.84	47.61	1.94	5.41	5.34	57.8	57.54	40.23	27.68	43.56	20.89	39.46	29.04	75.43	39.87	18.98	1.76	0.47	1.09	0
		125.6	114.08	127.15	41.18	83.24	51.23	1.98	5.69	5.71	64.18	50.6	43.52	24.57	40.55	20.68	36.12	28.22	77.21	41.03	19.13	1.75	0.45	1.16	0
		125.9	114.15	125.2	39.47	81.36	50.46	1.92	5.6	5.58	57.35	54.26	41.54	25.01	40.4	18.42	38.47	29.85	79.09	39.66	21.45	1.77	0.46	1.4	0
		125.92	115.71	126.29	41.45	78.76	49.05	1.73	5.31	5.5	63.57	50.81	44.18	25.14	42.59	19.3	39.72	29.03	76.62	39.61	20.99	1.76	0.46	1.41	0
		126	116.77	127.48	40.07	82.67	52.19	1.73	5.34	5.46	66.34	50.51	42.71	25.39	38.71	18.56	39.23	28.05	75.05	41.84	19.13	1.76	0.47	1.41	0
		126.96	117.46	127.37	38.37	87.27	50.31	1.76	5.35	5.52	60.09	55.5	45.33	24.75	40.91	20.29	38.25	31.15	73.62	42.93	19.97	1.79	0.45	1.34	0
		127.14	117.16	127.93	40.79	85.95	50.2	1.75	5.83	5.73	65.13	50.68	40.37	25.77	39.56	20.92	37.87	29.54	77.85	43.86	21.06	1.78	0.46	1.17	0
		127.25	117.17	127.56	41.35	79.25	46.82	1.75	5.62	5.4	57.96	50.55	42.56	25.43	41.39	20.41	38.71	27.54	73.43	40.56	21.31	1.78	0.46	1.1	0
		127.91	116.63	127.59	41.11	76.59	46.34	1.88	5.25	5.31	57.82	57.18	42.57	27.52	43.82	18.53	39.8	27.37	75.64	41.79	21.53	1.8	0.46	1.21	0
		128.03	117.47	129.7	41.62	85.41	49.71	1.75	5.94	5.07	57.4	52.14	46.19	27.22	40.97	19.36	37.4	28.85	73.82	40.71	21.41	1.79	0.47	1.44	0
		128.72	119.34	130.06	36.93	86.88	49.89	1.73	5.71	5.48	63.52	53.81	41.53	24.5	44.81	19.32	39.12	30.67	69.15	38.67	21.53	1.81	0.48	1.44	0
		128.8	119.46	129.49	41.41	84.37	47.45	2	5.52	5.82	61.76	49.83	43.87	24.38	43.76	18.54	36.72	31.63	73.02	41.5	18.73	1.8	0.46	1.15	0
		128.89	120.38	129.43	40.11	82.81	48.67	1.96	5.76	5.79	58.87	52.39	40.83	28.15	40.27	20.93	37.26	29.14	73.04	43.91	20.09	1.81	0.49	1.26	0
Scylla tranquebarica	Male	95.01	89.16	93.2	31.22	60.75	37.44	2.1	4.87	5.32	50.44	47.53	37.74	22.53	28.6	15.6	31.81	28.19	77.14	40.56	17.46	1.96	1.99	1.26	0.92
		95.15	89.89	94.17	30.03	65.15	35.63	2.08	4.94	4.88	49.26	47.26	36.27	23.4	28.17	15.16	32.11	28.9	76.65	37.79	18.31	1.64	0.38	1.11	0.9
		95.16	88.55	93.32	28.66	63.58	36.09	2.09	5.11	5.12	50.76	48.31	35.24	22.44	27.74	15.19	34.67	29.02	70.87	39.75	17.79	1.65	0.73	1.18	1.14
		95.21	88.85	93.18	28.47	65.52	34.6	2.21	5.19	5.35	47.96	50.19	35.9	22.84	27.77	14.17	34.72	29.87	70.85	37.93	17.39	2.82	1.15	1.18	1.19
		95.26	89.47	93.5	30.65	65.64	38.16	2.2	4.85	5.04	46.96	46.57	37.35	22.06	28.23	14.65	32.64	30.4	70.39	39.76	17.98	3.58	1.53	1.18	0.92
		95.34	89.02	93.78	29.84	65.93	38.04	2.15	5.1	5.01	50.53	49.8	39	24	26.96	14.52	32.33	27.99	71.86	39.01	17.79	1.87	2.02	1.31	1.1
		95.39	88.85	93.9	28.76	67.08	38.29	2.1	5.04	5.05	50.15	46.79	38.62	22.93	27.08	14.81	33.54	28.16	69.96	37.68	16.86	3.18	2.05	1.36	1.23
		95.43	89.2	94.28	30.65	61.31	34.73	2.22	5.17	5.34	51.42	48.17	37.79	22.19	27.67	15.44	33.74	28.43	74.86	37.46	17.22	2.13	1.92	1.1	1.2
		95.45	89.66	94.48	28.71	65.81	36.13	2.11	4.95	4.91	47.65	48.59	35.49	23.63	27.25	14.21	32.11	27.79	73.19	38.21	17.77	1.66	1.14	1.01	0.97
		95.46	89.71	94.16	30.35	63.64	35.25	2.09	4.89	5.01	50.33	50.54	38.22	24.09	27.39	14.41	31.69	29.35	76.79	38.53	18.74	3.44	1.47	1.14	1.23
		95.47	89.35	93.45	30.2	60.74	36.57	2.15	4.85	5.02	49.97	50.74	37.87	22.98	27.69	14.13	32.73	30.09	74.99	39.1	17.77	3.44	0.97	1.07	0.95
		95.48	89.69	93.44	28.34	65.9	35.34	2.2	5.13	5.3	50.32	50.52	35.64	23.32	25.83	15.01	33.89	28.23	77.99	38.26	16.83	1.92	0.78	1.14	1.33
		95.5	90.49	93.49	29.84	65.09	38.06	2.17	5.26	5.03	48.76	50.95	38.58	24.04	26.86	15.65	33.55	29.35	69.9	38.04	17.87	3.08	1.83	1.03	0.88
		96.82	91.49	94.79	28.44	62.27	36.49	1.87	4.08	5.06	47.39	23.39	37.43	22.32	25.82	14.57	29.64	24.46	57.81	34.67	15.38	2	2.01	1.28	0.94
		95.95	89.88	95.03	28.09	61.51	36.05	1.85	4.03	5	46.81	23.1	36.97	22.05	25.5	14.39	29.28	24.16	57.11	34.24	15.2	1.65	1.52	0.98	0.95
		97.51	92.06	95.51	28.15	61.63	36.12	1.85	4.03	5.01	46.9	23.15	37.05	22.09	25.55	14.42	29.34	24.21	57.22	34.31	15.23	1.69	0.4	1.13	0.93
		97.55	91.5	95.84	28.53	62.46	36.6	1.88	4.09	5.08	47.53	23.46	37.55	22.39	25.9	14.62	29.73	24.53	57.99	34.78	15.43	3.6	1.5	1.26	1.36
		96.96	90.41	95.79	28.55	62.51	36.63	1.88	4.09	5.08	47.57	23.48	37.58	22.41	25.92	14.63	29.76	24.55	58.04	34.8	15.44	2.97	0.99	1.24	1.19
		97.74	92.62	96.93	28.6	62.63	36.7	1.88	4.1	5.09	47.66	23.52	37.65	22.45	25.97	14.65	29.81	24.6	58.15	34.87	15.47	1.76	1.93	0.96	1.09
		98.23	91.46	97.15	28.45	62.29	36.5	1.87	4.08	5.07	47.4	23.4	37.44	22.33	25.83	14.58	29.65	24.47	57.83	34.68	15.39	1.93	2.05	1.34	1.13
		97.44	90.73	95.98	28.04	61.4	35.98	1.85	4.02	4.99	46.72	23.06	36.91	22.01	25.46	14.37	29.23	24.11	57	34.18	15.17	3.23	2.07	1.38	1.26
		97.91	92.55	96.86	28.59	62.6	36.69	1.88	4.1	5.09	47.64	23.51	37.63	22.44	25.96	14.65	29.8	24.59	58.12	34.85	15.47	2.19	1.95	1.13	1.23
		95.95	89.64	95	28.01	61.32	35.93	1.84	4.01	4.99	46.66	23.03	36.86	21.98	25.43	14.35	29.19	24.08	56.93	34.14	15.15	1.79	1.68	0.89	1.13
		98.96	93.02	97.02	27.86	61.01	35.75	1.83	3.99	4.96	46.43	22.92	36.67	21.87	25.3	14.28	29.04	23.96	56.64	33.97	15.07	3.52	1.51	1.18	1.27
		97.81	91.91	95.83	27.91	61.12	35.81	1.84	4	4.97	46.51	22.96	36.74	21.91	25.34	14.3	29.09	24	56.74	34.03	15.1	1.97	0.81	1.16	1.36
		97.29	92.01	96.44	28.66	62.74	36.77	1.89	4.11	5.1	47.75	23.57	37.72	22.49	26.02	14.68	29.87	24.64	58.25	34.93	15.5	3.13	1.85	1.05	0.9
		96.92	91.83	95.21	28.39	62.17	36.43	1.87	4.07	5.06	47.31	23.35	37.37	22.28	25.78	14.55	29.59	24.42	57.71	34.61	15.36	1.82	2.2	1.34	1.28
		96.58	90.57	94.6	27.84	60.96	35.72	1.83	3.99	4.96	46.39	22.9	36.64	21.85	25.28	14.26	29.02	23.94	56.59	33.94	15.06	3.72	1.82	0.92	0.89
		97.99	91.25	96.38	28.19	61.73	36.17	1.86	4.04	5.02	46.97	23.19	37.1	22.13	25.59	14.44	29.38	24.24	57.31	34.37	15.25	3.54	1.07	1.06	1.33
		98.01	91.85	96.37	28.74	62.92	36.87	1.89	4.12	5.12	47.88	23.63	37.82	22.55	26.09	14.72	29.95	24.71	58.41	35.03	15.54	2.84	1.56	1.16	1.15
		97.34	92.09	95.24	28.24	61.82	36.23	1.86	4.05	5.03	47.05	23.22	37.16	22.16	25.63	14.47	29.43	24.28	57.4	34.42	15.27	2.67	0.85	0.92	1.09
		96.83	91.66	95.93	27.91	61.1	35.81	1.84	4	4.97	46.5	22.95	36.73	21.9	25.34	14.3	29.09	24	56.73	34.02	15.1	2.57	2.36	1	1.32
		98.91	92.85	97.23	27.9	61.09	35.8	1.84	4	4.97	46.49	22.95	36.72	21.9	25.33	14.3	29.08	23.99	56.72	34.01	15.09	3.58	1.26	1.2	0.95
		98.43	92.5	96.74	28.63	62.69	36.73	1.88	4.1	5.1	47.7	23.55	37.68	22.47	25.99	14.67	29.84	24.62	58.2	34.9	15.49	2.19	1.97	1.24	1.08
		97.36	90.62	95.55	28.69	62.83	36.82	1.89	4.11	5.11	47.81	23.6	37.77	22.52	26.05	14.7	29.91	24.68	58.33	34.98	15.52	3.32	2.63	1.37	1.21
		96.93	91.13	95.95	28.45	62.3	36.51	1.87	4.08	5.07	47.41	23.4	37.45	22.33	25.83	14.58	29.65	24.47	57.84	34.68	15.39	2.25	1.99	1.05	1.02
		96.61	91.56	95.25	28.29	61.93	36.29	1.86	4.05	5.04	47.13	23.26	37.23	22.2	25.68	14.49	29.48	24.32	57.5	34.48	15.3	3.6	0.55	1.23	1.25
		98.74	92.62	97.82	28.04	61.4	35.98	1.85	4.02	4.99	46.73	23.06	36.91	22.01	25.46	14.37	29.23	24.12	57.01	34.18	15.17	3.8	1.65	1.31	1.06
		98.58	92.37	96.91	28.29	61.95	36.3	1.86	4.06	5.04	47.14	23.27	37.24	22.21	25.69	14.5	29.49	24.33	57.51	34.49	15.3	2.26	0.94	1.38	1.2
		96.61	91.06	95.65	27.94	61.17	35.84	1.84	4	4.97	46.55	22.98	36.77	21.93	25.36	14.31	29.12	24.02	56.79	34.05	15.11	2.7	2.11	1.02	1.35
		96.05	89.85	94.25	28.35	62.08	36.38	1.87	4.06	5.05	47.24	23.32	37.31	22.25	25.74	14.53	29.55	24.38	57.63	34.56	15.34	2.73	2.38	1.31	1.25
		98.06	91.9	96.44	27.85	60.98	35.74	1.83	3.99	4.96	46.41	22.91	36.66	21.86	25.29	14.27	29.03	23.95	56.62	33.95	15.07	3.63	1.94	0.9	1.12
		98.53	92.05	97.34	28.28	61.92	36.28	1.86	4.05	5.04	47.12	23.26	37.22	22.2	25.67	14.49	29.47	24.32	57.48	34.47	15.3	2.51	1.85	1.03	1.31
		96.9	91.37	95.34	28.09	61.5	36.04	1.85	4.03	5	46.8	23.1	36.97	22.05	25.5	14.39	29.28	24.16	57.1	34.24	15.19	2.85	1.62	1.14	1.34
		98.16	92.41	96.78	28.23	61.81	36.22	1.86	4.05	5.03	47.04	23.22	37.15	22.16	25.63	14.46	29.42	24.28	57.38	34.41	15.27	1.73	0.43	1.23	0.99
		97.88	92.97	96.33	28.6	62.62	36.69	1.88	4.1	5.09	47.65	23.52	37.64	22.45	25.96	14.65	29.81	24.59	58.13	34.86	15.47	3.01	1.63	1.3	0.98
		97.65	91.45	96.76	28.01	61.33	35.94	1.84	4.01	4.99	46.67	23.04	36.87	21.99	25.43	14.35	29.19	24.09	56.94	34.15	15.15	1.56	0.54	1.03	1.2
		97.32	91.67	95.89	28.53	62.47	36.61	1.88	4.09	5.08	47.54	23.46	37.55	22.39	25.9	14.62	29.74	24.54	58	34.78	15.43	1.87	1.63	1.07	1
		96.92	90.09	94.92	27.94	61.17	35.84	1.84	4	4.97	46.55	22.98	36.77	21.93	25.36	14.31	29.12	24.02	56.79	34.05	15.11	3.54	1.15	1.1	1.19
		98.56	92.76	97.75	28.28	61.91	36.28	1.86	4.05	5.03	47.11	23.25	37.21	22.19	25.67	14.49	29.47	24.32	57.48	34.47	15.3	1.99	1.88	1.39	1.24
		98.42	91.8	96.76	27.99	61.28	35.91	1.84	4.01	4.98	46.63	23.02	36.84	21.97	25.41	14.34	29.17	24.07	56.89	34.12	15.14	3.22	2.29	0.95	1.35
		98.43	92.06	96.83	28.13	61.58	36.09	1.85	4.03	5.01	46.86	23.13	37.02	22.07	25.53	14.41	29.31	24.19	57.17	34.28	15.21	2.22	0.89	1.29	1.05
		98.17	92.31	96.31	27.91	61.12	35.81	1.84	4	4.97	46.51	22.96	36.74	21.91	25.34	14.3	29.09	24	56.74	34.03	15.1	2.16	2.56	1.23	1.03
		97.88	91.74	97.07	28.13	61.59	36.09	1.85	4.03	5.01	46.87	23.14	37.02	22.08	25.54	14.41	29.32	24.19	57.18	34.29	15.22	1.64	2.34	1.15	1.38
		96.8	90.87	95.82	28.71	62.87	36.84	1.89	4.12	5.11	47.84	23.62	37.79	22.54	26.07	14.71	29.93	24.69	58.37	35	15.53	2.65	1.56	1.27	0.95
		97.19	91.29	95.8	28.52	62.44	36.59	1.88	4.09	5.08	47.52	23.46	37.54	22.38	25.89	14.61	29.72	24.53	57.97	34.76	15.43	2.44	0.72	0.95	1.26
		97.8	91.78	96.91	28.07	61.47	36.02	1.85	4.02	5	46.77	23.09	36.95	22.03	25.49	14.38	29.26	24.14	57.07	34.22	15.19	2.9	2.57	0.95	0.92
		97.67	91.55	96.27	28.31	61.99	36.32	1.86	4.06	5.04	47.17	23.28	37.26	22.22	25.7	14.5	29.51	24.35	57.55	34.51	15.31	1.71	1.88	1.2	1.25
		97.46	90.97	95.68	28.11	61.54	36.06	1.85	4.03	5	46.83	23.11	36.99	22.06	25.52	14.4	29.29	24.17	57.13	34.26	15.2	2.22	2.35	1.1	1.09
		97.74	90.21	96.02	28.43	62.24	36.47	1.87	4.07	5.06	47.36	23.38	37.41	22.31	25.81	14.56	29.63	24.45	57.79	34.65	15.38	2.15	1.24	1.3	0.89
		96.28	90.46	94.56	28.58	62.57	36.66	1.88	4.1	5.09	47.61	23.5	37.61	22.43	25.94	14.64	29.78	24.57	58.09	34.83	15.46	3.66	1.09	1.13	1.07
		96.24	88.71	94.54	28.62	62.67	36.73	1.88	4.1	5.1	47.69	23.54	37.67	22.47	25.99	14.67	29.83	24.62	58.19	34.89	15.48	2.6	2.45	0.88	1.15
		96.54	90.56	95.62	27.93	61.15	35.84	1.84	4	4.97	46.54	22.97	36.76	21.92	25.36	14.31	29.11	24.02	56.78	34.05	15.11	1.82	1.5	0.99	1
		97.05	89.7	95.34	28.32	62	36.33	1.86	4.06	5.04	47.18	23.29	37.27	22.22	25.71	14.51	29.51	24.35	57.56	34.52	15.32	1.82	2.61	1.11	1.19
		98.08	90.76	96.62	28.7	62.84	36.82	1.89	4.11	5.11	47.82	23.6	37.77	22.53	26.06	14.7	29.91	24.68	58.34	34.98	15.52	1.88	2.47	1.12	1.31
		96.51	89.29	94.49	28.45	62.29	36.5	1.87	4.08	5.07	47.4	23.4	37.44	22.33	25.83	14.57	29.65	24.46	57.83	34.68	15.39	2.19	2.62	0.93	0.98
		97.1	89.75	95.03	28.28	61.92	36.28	1.86	4.05	5.04	47.12	23.26	37.22	22.2	25.67	14.49	29.47	24.32	57.48	34.47	15.3	2.64	1.1	1.3	0.91
		96.89	91.05	95.6	28.03	61.37	35.96	1.84	4.02	4.99	46.7	23.05	36.89	22	25.45	14.36	29.21	24.1	56.98	34.17	15.16	2.24	1.62	1.29	1.17
		98.53	91.63	96.48	29.41	64.38	37.73	1.94	4.21	5.24	48.99	24.18	38.7	23.08	26.7	15.07	30.65	25.29	59.77	35.84	15.91	3.62	1.12	1.02	1.19
		99.58	92.61	97.59	28.49	62.39	36.56	1.88	4.08	5.07	47.48	23.43	37.5	22.36	25.87	14.6	29.7	24.5	57.92	34.73	15.41	3.67	1.79	1.35	1.02
		99.31	91	98.47	29.55	64.69	37.91	1.94	4.23	5.26	49.23	24.3	38.88	23.19	26.82	15.14	30.79	25.41	60.06	36.01	15.98	1.88	0.54	1.39	1.1
		102.25	93.98	100.38	28.45	62.29	36.5	1.87	4.08	5.07	47.4	23.4	37.44	22.33	25.83	14.57	29.65	24.46	57.83	34.68	15.39	2.31	0.92	1.13	0.98
		101.6	94.85	99.94	29.18	63.88	37.43	1.92	4.18	5.19	48.61	23.99	38.4	22.9	26.49	14.95	30.41	25.09	59.31	35.56	15.78	2.19	0.93	1.1	1.34
		102.8	94.34	100.89	29.74	65.11	38.16	1.96	4.26	5.3	49.55	24.46	39.14	23.34	27	15.24	30.99	25.57	60.45	36.25	16.09	2.16	2.69	1.11	1.09
		102.23	94.04	100.18	29.47	64.52	37.81	1.94	4.22	5.25	49.1	24.23	38.78	23.13	26.75	15.1	30.71	25.34	59.9	35.92	15.94	3.08	0.46	1.22	1.13
		100.83	92.09	99.8	28.47	62.33	36.53	1.87	4.08	5.07	47.43	23.41	37.47	22.34	25.84	14.58	29.67	24.48	57.87	34.7	15.4	2.17	1.82	1.33	1.37
		101.15	92.81	99.87	29.53	64.66	37.89	1.94	4.23	5.26	49.21	24.29	38.87	23.18	26.81	15.13	30.78	25.4	60.03	36	15.98	2.15	2.32	1.21	1.2
		100.01	92.44	98.91	29.87	65.41	38.33	1.97	4.28	5.32	49.77	24.57	39.32	23.45	27.12	15.3	31.13	25.69	60.72	36.41	16.16	2.67	0.87	1.4	0.99
		98.68	90.81	97.09	29.5	64.58	37.84	1.94	4.23	5.25	49.14	24.26	38.82	23.15	26.78	15.11	30.74	25.36	59.96	35.95	15.95	3.4	1.91	0.91	1.24
		102.85	95.37	100.77	28.64	62.71	36.75	1.88	4.1	5.1	47.72	23.55	37.69	22.48	26	14.67	29.85	24.63	58.22	34.91	15.49	3.31	0.78	1.23	1.33
		102.47	95.02	100.51	28.85	63.17	37.02	1.9	4.14	5.14	48.07	23.73	37.97	22.64	26.19	14.78	30.07	24.81	58.65	35.17	15.61	1.74	0.72	1.36	1.08
		99.08	91.06	97.85	28.73	62.9	36.86	1.89	4.12	5.11	47.86	23.62	37.81	22.55	26.08	14.72	29.94	24.7	58.39	35.02	15.54	2.45	0.63	0.96	1.26
		98.9	92.25	97.17	29.8	65.25	38.23	1.96	4.27	5.31	49.65	24.51	39.22	23.39	27.05	15.27	31.06	25.63	60.58	36.33	16.12	3.06	2.33	1.31	1.09
		98.22	89.49	96.17	29.28	64.12	37.57	1.93	4.2	5.21	48.79	24.08	38.54	22.98	26.59	15	30.52	25.18	59.53	35.7	15.84	1.54	2.25	1.3	1.19
		99.97	91.73	97.97	28.95	63.39	37.15	1.91	4.15	5.16	48.24	23.81	38.11	22.72	26.28	14.83	30.17	24.9	58.85	35.29	15.66	3.38	0.81	0.98	1.38
		99.29	92.68	97.89	28.84	63.14	37	1.9	4.13	5.13	48.05	23.72	37.96	22.63	26.18	14.78	30.06	24.8	58.62	35.15	15.6	1.74	1.53	1.2	0.95
		98.27	90.93	96.25	28.59	62.6	36.68	1.88	4.1	5.09	47.64	23.51	37.63	22.44	25.96	14.65	29.8	24.59	58.12	34.85	15.47	2.67	1.23	1.05	1.33
		100.17	93.24	99.09	28.48	62.36	36.54	1.87	4.08	5.07	47.45	23.42	37.48	22.35	25.86	14.59	29.68	24.49	57.89	34.72	15.41	3.66	2.56	1.37	0.95
		102.54	94.66	101.73	29.88	65.41	38.33	1.97	4.28	5.32	49.78	24.57	39.32	23.45	27.12	15.31	31.14	25.69	60.73	36.42	16.16	2.02	0.57	1.31	1.04
		101.43	94.83	100.49	29.16	63.85	37.42	1.92	4.18	5.19	48.59	23.98	38.38	22.89	26.47	14.94	30.39	25.08	59.28	35.55	15.77	2.72	1.96	1.33	1.21
		99.57	91.17	97.79	29.38	64.32	37.69	1.93	4.21	5.23	48.95	24.16	38.66	23.06	26.67	15.05	30.62	25.26	59.71	35.81	15.89	1.73	1.31	1	1.26
		99.65	91.88	97.87	29.89	65.44	38.35	1.97	4.28	5.32	49.8	24.58	39.34	23.46	27.14	15.31	31.15	25.7	60.76	36.43	16.17	2.05	2.03	0.95	1.04
		103.06	95.03	101.66	29.3	64.16	37.6	1.93	4.2	5.22	48.82	24.1	38.57	23	26.6	15.01	30.54	25.2	59.57	35.72	15.85	1.99	0.76	1.4	1.38
		107.73	98.89	106.43	31.47	68.9	40.38	2.07	4.51	5.6	52.43	25.88	41.42	24.7	28.57	16.12	32.8	27.06	63.97	38.36	17.02	2.79	1.33	1.08	1.39
		106.39	99.7	104.99	30.49	66.75	39.12	2.01	4.37	5.43	50.8	25.07	40.13	23.93	27.68	15.62	31.78	26.22	61.97	37.16	16.49	3.16	1.71	1.38	1.22
		103.7	96.98	101.92	30.86	67.57	39.6	2.03	4.42	5.5	51.42	25.38	40.62	24.22	28.02	15.81	32.17	26.54	62.74	37.62	16.69	2.13	2.7	1.37	1.36
		109.19	102.37	107.55	30.57	66.93	39.22	2.01	4.38	5.44	50.93	25.14	40.23	23.99	27.75	15.66	31.86	26.29	62.14	37.26	16.54	1.91	2.37	1.19	1.39
		101.84	94.19	100.72	31.22	68.36	40.06	2.05	4.47	5.56	52.02	25.68	41.09	24.5	28.35	16	32.54	26.85	63.47	38.06	16.89	3.2	2.08	1.17	1.07
		110.95	103.92	109.98	31.03	67.94	39.81	2.04	4.45	5.53	51.7	25.52	40.84	24.35	28.17	15.9	32.34	26.69	63.08	37.83	16.79	3.97	2.57	1.47	1.09
		110.95	102.52	110.04	29.5	64.58	37.84	1.94	4.23	5.25	49.14	24.26	38.82	23.15	26.78	15.11	30.74	25.36	59.96	35.95	15.95	2.52	1.31	1.37	1.47
		109.04	102.21	108.22	29.95	65.57	38.42	1.97	4.29	5.33	49.9	24.63	39.42	23.5	27.19	15.34	31.21	25.75	60.88	36.51	16.2	3.18	1.35	1.26	1.5
		110.66	102.76	109.01	31.13	68.16	39.94	2.05	4.46	5.54	51.87	25.6	40.97	24.43	28.26	15.95	32.45	26.77	63.28	37.95	16.84	3.79	0.84	1.52	1.44
		101.65	93.59	100.49	30.21	66.14	38.76	1.99	4.33	5.38	50.33	24.84	39.76	23.71	27.42	15.48	31.48	25.98	61.4	36.82	16.34	2.93	0.99	1.17	1.05
		110.23	102.33	108.17	32.2	70.5	41.31	2.12	4.61	5.73	53.65	26.48	42.38	25.27	29.23	16.5	33.56	27.69	65.45	39.25	17.42	2.89	2.46	1.24	1.23
		101.41	93.18	99.6	29.36	64.28	37.67	1.93	4.21	5.23	48.92	24.15	38.64	23.04	26.65	15.04	30.6	25.25	59.68	35.79	15.88	3.44	1.56	1.11	1.25
		108.93	100.38	107.83	31.64	69.28	40.6	2.08	4.53	5.63	52.72	26.02	41.64	24.83	28.72	16.21	32.98	27.21	64.32	38.57	17.12	1.91	2.44	1.46	1.48
		106.39	99.03	105.01	29.73	65.1	38.15	1.96	4.26	5.29	49.54	24.45	39.13	23.34	26.99	15.23	30.99	25.57	60.44	36.24	16.08	2.5	2.58	1.27	1.2
		106.5	99.01	104.97	30.48	66.73	39.1	2.01	4.37	5.43	50.78	25.06	40.11	23.92	27.67	15.61	31.76	26.21	61.95	37.15	16.49	3.53	1.29	1.44	1.4
		110.56	103.86	109.1	31.3	68.52	40.15	2.06	4.49	5.57	52.14	25.74	41.19	24.56	28.41	16.03	32.62	26.91	63.61	38.15	16.93	3.63	1.45	1.45	1.48
		110.08	102.37	108.19	28.94	63.37	37.13	1.9	4.15	5.15	48.22	23.8	38.09	22.71	26.27	14.83	30.16	24.89	58.83	35.28	15.65	2.83	0.54	1.29	1.28
		105.58	99.03	103.63	30.81	67.45	39.53	2.03	4.42	5.49	51.33	25.34	40.55	24.18	27.97	15.78	32.11	26.49	62.62	37.55	16.66	3.43	0.77	1.04	1.41
		107.27	99.55	105.66	29.77	65.17	38.19	1.96	4.27	5.3	49.59	24.48	39.17	23.36	27.02	15.25	31.02	25.6	60.51	36.28	16.1	1.98	1.63	1.25	1.31
		105.46	97.4	103.7	30.4	66.55	39	2	4.36	5.41	50.64	25	40	23.86	27.59	15.57	31.68	26.14	61.79	37.05	16.44	1.8	1.81	1.27	0.98
		105.18	97.46	104.04	29.35	64.26	37.65	1.93	4.21	5.23	48.9	24.14	38.62	23.03	26.64	15.04	30.59	25.24	59.66	35.77	15.87	3.92	1.8	0.98	1.24
		102.59	95.8	101.65	29.8	65.24	38.23	1.96	4.27	5.31	49.65	24.51	39.22	23.39	27.05	15.27	31.06	25.62	60.57	36.32	16.12	3.24	0.81	1.41	1.38
		106.36	98.87	105.44	31.78	69.58	40.77	2.09	4.55	5.66	52.95	26.13	41.82	24.94	28.85	16.28	33.12	27.33	64.59	38.73	17.19	3.7	1.18	1.06	1.1
		109.2	102.13	107.56	30.9	67.66	39.65	2.03	4.43	5.5	51.49	25.41	40.67	24.25	28.06	15.83	32.21	26.58	62.82	37.67	16.72	2.95	0.93	1.43	1.27
		109.43	101.1	107.61	29.3	64.14	37.59	1.93	4.2	5.22	48.81	24.09	38.56	22.99	26.6	15.01	30.53	25.19	59.55	35.71	15.85	2.29	2.01	1.37	1.51
		100.71	94.06	99.17	29.14	63.79	37.38	1.92	4.18	5.19	48.54	23.96	38.35	22.87	26.45	14.93	30.37	25.06	59.22	35.51	15.76	2.06	2.66	1.42	1.27
		106.69	99.87	104.9	31.61	69.22	40.56	2.08	4.53	5.63	52.67	26	41.61	24.81	28.7	16.2	32.95	27.19	64.26	38.54	17.1	1.73	1.39	1.03	1.39
		106.82	99.99	105.2	30.7	67.22	39.39	2.02	4.4	5.47	51.16	25.25	40.41	24.1	27.87	15.73	32	26.4	62.41	37.43	16.61	3.92	2.78	1.15	1.27
		108.7	101.78	106.82	30.11	65.91	38.63	1.98	4.31	5.36	50.16	24.76	39.62	23.63	27.33	15.42	31.38	25.89	61.2	36.7	16.28	2.79	1.67	1.11	1.38
		101.87	94.59	100.71	29.35	64.26	37.65	1.93	4.21	5.23	48.9	24.14	38.62	23.03	26.64	15.04	30.59	25.24	59.66	35.77	15.87	2.39	1.71	1.23	1.18
		109.77	102.63	107.86	30.02	65.72	38.51	1.98	4.3	5.34	50.01	24.69	39.51	23.56	27.25	15.38	31.29	25.81	61.02	36.59	16.24	1.86	2.43	1.05	1.25
		109.61	102.45	107.58	29.36	64.27	37.67	1.93	4.21	5.23	48.91	24.14	38.64	23.04	26.65	15.04	30.6	25.25	59.67	35.78	15.88	2.77	0.83	1.23	1.24
		100.8	92.36	99.22	29.48	64.55	37.83	1.94	4.23	5.25	49.12	24.25	38.8	23.14	26.76	15.1	30.73	25.35	59.93	35.94	15.95	3.06	1.13	1.37	1.34
		104.04	96.22	102.71	29.06	63.63	37.29	1.91	4.17	5.17	48.42	23.9	38.25	22.81	26.38	14.89	30.29	24.99	59.07	35.42	15.72	2.13	2.45	1.41	1.08
		101.38	94.58	99.68	31.41	68.77	40.3	2.07	4.5	5.59	52.34	25.83	41.34	24.65	28.52	16.09	32.74	27.01	63.85	38.29	16.99	2.04	1.82	1.14	1.08
		104.01	96.76	102.78	32.06	70.19	41.13	2.11	4.59	5.71	53.41	26.36	42.19	25.16	29.1	16.42	33.41	27.57	65.16	39.07	17.34	3.59	0.97	1.18	1
		108.07	101.57	106.37	31.01	67.88	39.78	2.04	4.44	5.52	51.66	25.5	40.81	24.33	28.15	15.88	32.31	26.66	63.02	37.79	16.77	3.59	1.28	1.19	1.27
		104.68	96.5	102.68	30.33	66.4	38.91	2	4.35	5.4	50.53	24.94	39.91	23.8	27.53	15.54	31.61	26.08	61.64	36.97	16.4	1.97	1.34	1.13	1.44
		105.22	96.68	104.03	31.62	69.23	40.57	2.08	4.53	5.63	52.68	26	41.62	24.82	28.71	16.2	32.95	27.19	64.28	38.54	17.1	3.41	2.15	1.27	1.4
		99.32	90.95	97.66	30.35	66.45	38.94	2	4.35	5.4	50.57	24.96	39.95	23.82	27.55	15.55	31.63	26.1	61.7	37	16.42	3.07	1.18	1.29	1.32
		103.93	96.25	102.21	31.03	67.94	39.81	2.04	4.45	5.52	51.7	25.52	40.84	24.35	28.17	15.9	32.34	26.68	63.07	37.82	16.78	2.28	2.64	1.02	1.35
		99.21	92.33	98.11	30.81	67.46	39.53	2.03	4.42	5.49	51.33	25.34	40.55	24.18	27.97	15.79	32.11	26.5	62.63	37.56	16.67	3.59	1.11	1.11	1.36
		106.06	98.23	105.23	32.1	70.29	41.19	2.11	4.6	5.72	53.49	26.4	42.25	25.2	29.14	16.45	33.46	27.61	65.25	39.13	17.36	2.74	2.68	1.12	1.15
		110.2	103.22	108.72	29.1	63.72	37.34	1.92	4.17	5.18	48.49	23.93	38.3	22.84	26.42	14.91	30.33	25.03	59.16	35.48	15.74	3.56	1.57	1.33	1.13
		102.03	94.24	100.07	31.17	68.25	39.99	2.05	4.47	5.55	51.93	25.63	41.02	24.46	28.3	15.97	32.49	26.81	63.36	38	16.86	2.2	0.6	1.03	1.3
		105.6	97	103.79	31.51	69	40.43	2.07	4.52	5.61	52.5	25.92	41.47	24.73	28.61	16.14	32.84	27.1	64.06	38.41	17.05	1.98	1.37	1.1	1.01
		106.01	98.46	104.98	28.8	63.05	36.95	1.89	4.13	5.13	47.98	23.68	37.9	22.6	26.14	14.75	30.01	24.76	58.53	35.1	15.58	1.78	0.76	1.1	1.15
		108.2	101.15	106.28	30.79	67.41	39.5	2.03	4.41	5.48	51.3	25.32	40.52	24.17	27.95	15.77	32.09	26.48	62.59	37.53	16.66	2.65	1.93	1.15	1.46
		110.61	103.97	108.79	28.87	63.21	37.04	1.9	4.14	5.14	48.1	23.74	38	22.66	26.21	14.79	30.09	24.83	58.69	35.19	15.62	2.73	1.41	1.12	1.16
		108.36	100.71	106.68	31.16	68.23	39.98	2.05	4.47	5.55	51.92	25.63	41.01	24.46	28.29	15.96	32.48	26.8	63.34	37.98	16.86	3.76	1.29	1.44	1.3
		103.63	94.95	102	29.94	65.56	38.42	1.97	4.29	5.33	49.89	24.62	39.41	23.5	27.18	15.34	31.21	25.75	60.86	36.5	16.2	3.8	0.76	1.37	1.17
		102.4	94.11	100.77	29.29	64.12	37.58	1.93	4.2	5.21	48.8	24.09	38.54	22.99	26.59	15	30.52	25.19	59.53	35.7	15.84	2.09	2.02	1.1	1.38
		104.68	96.41	102.88	30.72	67.26	39.42	2.02	4.4	5.47	51.18	25.26	40.43	24.11	27.89	15.74	32.02	26.42	62.45	37.45	16.62	2.97	0.68	1.02	1.34
		108.86	101.41	107.6	28.93	63.35	37.12	1.9	4.15	5.15	48.21	23.79	38.08	22.71	26.27	14.82	30.15	24.88	58.81	35.27	15.65	2.17	2.67	1.42	1.23
		103.35	95.14	101.89	29.95	65.58	38.43	1.97	4.29	5.33	49.9	24.63	39.42	23.51	27.19	15.34	31.22	25.76	60.88	36.51	16.2	1.82	1.71	0.96	0.95
		107.31	100.78	106	32.18	70.45	41.28	2.12	4.61	5.73	53.61	26.46	42.35	25.25	29.21	16.49	33.54	27.67	65.41	39.22	17.41	2.93	2.11	1.43	1.27
		102.67	95.76	100.83	30.55	66.89	39.2	2.01	4.38	5.44	50.9	25.12	40.21	23.98	27.73	15.65	31.84	26.27	62.1	37.24	16.52	3.13	1.29	1.3	0.95
		103.32	94.43	102.32	31.05	67.99	39.84	2.04	4.45	5.53	51.74	25.54	40.87	24.37	28.19	15.91	32.36	26.7	63.12	37.85	16.8	3.69	2	1.28	1.08
		101	94.34	99.29	32.08	70.24	41.16	2.11	4.6	5.71	53.45	26.38	42.22	25.18	29.13	16.44	33.44	27.59	65.21	39.11	17.35	3.43	2.3	0.94	1
		110.09	101.7	108.1	31.36	68.67	40.24	2.06	4.5	5.58	52.26	25.79	41.28	24.62	28.47	16.07	32.69	26.97	63.76	38.23	16.97	3.26	2.58	1.08	1.09
		104.19	95.36	102.18	31.88	69.81	40.91	2.1	4.57	5.68	53.12	26.22	41.96	25.02	28.95	16.34	33.23	27.42	64.81	38.87	17.25	3.13	1.22	1.23	1.04
		103.35	95.16	101.3	30.67	67.14	39.34	2.02	4.4	5.46	51.09	25.22	40.36	24.07	27.84	15.71	31.96	26.37	62.33	37.38	16.59	2.92	0.71	1.45	1.01
		104.92	96.58	103.35	29.58	64.76	37.95	1.95	4.24	5.27	49.28	24.33	38.93	23.22	26.85	15.15	30.83	25.44	60.13	36.06	16	3.77	0.72	1.34	1.35
		107.31	99.77	105.39	31.59	69.17	40.53	2.08	4.53	5.62	52.64	25.98	41.58	24.79	28.68	16.19	32.92	27.17	64.22	38.51	17.09	2.36	1.21	1.46	1.01
		107.43	98.76	106.63	28.81	63.09	36.97	1.9	4.13	5.13	48.01	23.7	37.92	22.61	26.16	14.76	30.03	24.78	58.57	35.12	15.59	3.2	2.25	1.22	1.4
		104.42	97.63	102.52	29.69	65.01	38.1	1.95	4.26	5.29	49.47	24.42	39.08	23.3	26.96	15.21	30.95	25.53	60.36	36.19	16.06	2.62	2.31	1.05	1.3
		102.4	94.37	100.76	31.01	67.9	39.79	2.04	4.45	5.52	51.67	25.51	40.82	24.34	28.16	15.89	32.32	26.67	63.04	37.8	16.78	3.55	2.3	1.23	1.27
		107.32	99.64	106.05	28.79	63.04	36.94	1.89	4.13	5.13	47.97	23.68	37.89	22.6	26.14	14.75	30.01	24.76	58.52	35.09	15.57	2.16	0.69	1.29	1.28
		106.99	99.45	105.86	31.87	69.78	40.89	2.1	4.57	5.68	53.1	26.21	41.95	25.02	28.94	16.33	33.22	27.41	64.79	38.85	17.24	2.13	1.3	1.47	1.13
		105.16	96.98	103.48	30.26	66.25	38.82	1.99	4.34	5.39	50.42	24.88	39.82	23.75	27.47	15.5	31.54	26.02	61.51	36.88	16.37	3.02	2.45	1.21	1.07
		102.97	95.19	102.15	29.09	63.69	37.32	1.91	4.17	5.18	48.47	23.92	38.28	22.83	26.41	14.9	30.32	25.02	59.13	35.46	15.74	3.89	1.81	0.98	1.41
		108.34	99.59	106.66	30.47	66.71	39.09	2	4.37	5.42	50.76	25.06	40.1	23.91	27.66	15.61	31.75	26.2	61.93	37.14	16.48	3.68	1.21	1.31	1.28
		110.62	102.73	108.62	32.14	70.36	41.23	2.11	4.61	5.72	53.54	26.43	42.3	25.22	29.18	16.46	33.49	27.64	65.33	39.17	17.38	3.06	1.98	1.11	1.52
		106.76	98.96	105	29.55	64.71	37.92	1.94	4.24	5.26	49.24	24.3	38.9	23.2	26.83	15.14	30.8	25.41	60.07	36.02	15.99	2.36	0.82	1.04	1.46
		108.22	100.21	107.15	29.97	65.62	38.45	1.97	4.3	5.34	49.94	24.65	39.45	23.52	27.21	15.36	31.24	25.77	60.92	36.53	16.21	1.94	0.87	1.05	1.19
		104.42	96.46	102.61	30.91	67.67	39.66	2.03	4.43	5.5	51.5	25.42	40.68	24.26	28.06	15.84	32.21	26.58	62.83	37.68	16.72	2.24	1.62	1.28	1.03
		99.52	91.15	97.53	31.84	69.7	40.85	2.09	4.56	5.67	53.04	26.18	41.9	24.99	28.9	16.31	33.18	27.38	64.71	38.81	17.22	2.2	1.55	0.94	1.33
		99.56	91.43	98.29	29.36	64.28	37.67	1.93	4.21	5.23	48.92	24.15	38.64	23.04	26.65	15.04	30.6	25.25	59.68	35.79	15.88	2.13	0.63	1.24	1.12
		103.85	95.44	102.2	30.5	66.79	39.14	2.01	4.37	5.43	50.82	25.09	40.14	23.94	27.69	15.63	31.79	26.23	62	37.18	16.5	3.53	1.8	1.26	1.44
		105.41	96.99	104.59	29.93	65.53	38.4	1.97	4.29	5.33	49.86	24.61	39.39	23.49	27.17	15.33	31.19	25.74	60.84	36.48	16.19	3.9	2.33	1.36	1.39
		113.63	106.03	112.33	35.46	72.07	42.88	2.24	5.6	5.84	58.48	28.37	47.58	28.34	28.74	17.54	38.9	46.51	82.66	48.1	23.23	3.69	1.43	1.53	1.09
		113.31	105.14	111.77	35.28	71.72	42.67	2.22	5.57	5.81	58.2	28.23	47.35	28.21	28.6	17.46	38.71	46.28	82.26	47.86	23.12	2.53	0.92	1.26	1.12
		117.76	109.98	116.45	37.85	76.94	45.78	2.39	5.98	6.23	62.43	30.28	50.79	30.26	30.68	18.73	41.52	49.65	88.24	51.35	24.8	2.99	1.26	1.21	1.41
		117.32	108.92	115.58	38.37	78	46.41	2.42	6.06	6.32	63.29	30.7	51.49	30.67	31.1	18.98	42.1	50.33	89.46	52.05	25.14	2.21	2.18	1.36	1.4
		114.49	105.82	113.2	38.59	78.44	46.67	2.43	6.09	6.35	63.65	30.87	51.78	30.85	31.28	19.09	42.33	50.61	89.96	52.35	25.28	2.09	0.61	1.49	1.4
		123.91	115.1	122.24	35.43	72.03	42.86	2.23	5.6	5.83	58.45	28.35	47.55	28.33	28.72	17.53	38.87	46.48	82.61	48.07	23.22	4.09	2.62	1.62	1.62
		112.04	104.28	110.4	39.21	79.7	47.42	2.47	6.19	6.45	64.67	31.37	52.61	31.34	31.78	19.4	43.01	51.43	91.41	53.19	25.69	3.28	1.94	1.09	1.51
		124.22	116.45	122.32	36.62	74.43	44.29	2.31	5.78	6.03	60.4	29.29	49.13	29.27	29.68	18.12	40.17	48.03	85.36	49.67	23.99	3.55	1.43	1.35	1.64
		123.85	115.05	122.45	35.75	72.67	43.24	2.25	5.65	5.88	58.97	28.6	47.97	28.58	28.98	17.69	39.22	46.89	83.34	48.49	23.42	3.58	2.69	1.29	1.42
		113.12	105.04	111.17	39.27	79.82	47.49	2.48	6.2	6.46	64.77	31.42	52.69	31.39	31.83	19.43	43.08	51.5	91.55	53.27	25.73	3.9	1.6	1.32	1.51
		112.51	104.47	111.08	36.68	74.56	44.36	2.31	5.79	6.04	60.5	29.34	49.22	29.32	29.73	18.15	40.24	48.11	85.51	49.76	24.03	2.64	0.74	1.44	1.14
		122.4	113.5	120.86	38.69	78.64	46.79	2.44	6.11	6.37	63.81	30.95	51.91	30.93	31.36	19.14	42.44	50.74	90.19	52.48	25.35	3.39	2.12	1.63	1.31
		113.07	104.43	111.81	37.93	77.11	45.88	2.39	5.99	6.24	62.57	30.35	50.9	30.32	30.75	18.77	41.61	49.75	88.43	51.46	24.85	2.76	0.96	1.43	1.12
		113.62	105.96	112.81	36.04	73.27	43.59	2.27	5.69	5.93	59.45	28.84	48.37	28.81	29.22	17.83	39.54	47.28	84.03	48.9	23.62	3.31	1.39	1.31	1.32
		115.91	107.23	114.56	36.09	73.37	43.65	2.28	5.7	5.94	59.54	28.88	48.44	28.85	29.26	17.86	39.6	47.34	84.15	48.96	23.65	4.09	1.14	1.31	1.22
		121.62	113.88	119.62	37.95	77.14	45.9	2.39	5.99	6.25	62.6	30.36	50.93	30.34	30.76	18.78	41.64	49.78	88.48	51.48	24.87	3.48	2.66	1.23	1.45
		116.66	109.15	115.16	37.68	76.59	45.57	2.38	5.95	6.2	62.15	30.14	50.56	30.12	30.54	18.64	41.34	49.42	87.84	51.11	24.69	3.85	1.91	1.6	1.15
		121.37	113.24	119.28	37.46	76.15	45.31	2.36	5.92	6.17	61.79	29.97	50.27	29.95	30.36	18.53	41.1	49.14	87.33	50.82	24.54	3.71	2.85	1.39	1.27
		118.13	109.98	117.26	37.38	75.99	45.22	2.36	5.9	6.15	61.66	29.91	50.17	29.89	30.3	18.5	41.01	49.04	87.16	50.71	24.49	2.71	0.83	1.56	1.11
		124.5	115.83	123.13	36.47	74.13	44.11	2.3	5.76	6	60.15	29.18	48.94	29.15	29.56	18.04	40.01	47.83	85.02	49.47	23.89	3.47	2.78	1.33	1.53
		125.45	116.93	123.5	36.23	73.65	43.82	2.28	5.72	5.96	59.76	28.99	48.62	28.96	29.37	17.92	39.75	47.52	84.46	49.15	23.74	2.76	1.63	1.59	1.69
		113.89	105.43	112.31	38.65	78.57	46.75	2.44	6.1	6.36	63.75	30.92	51.87	30.9	31.33	19.12	42.4	50.7	90.11	52.43	25.32	2.61	1.12	1.55	1.51
		113.97	105.54	112.27	37.85	76.95	45.78	2.39	5.98	6.23	62.44	30.28	50.8	30.26	30.68	18.73	41.53	49.65	88.25	51.35	24.8	2.39	1.12	1.08	1.23
		118.25	109.63	116.47	37.11	75.44	44.89	2.34	5.86	6.11	61.21	29.69	49.8	29.67	30.08	18.36	40.71	48.68	86.52	50.34	24.32	2.43	0.85	1.28	1.18
		122.02	113.83	120.87	37.34	75.91	45.17	2.35	5.9	6.15	61.6	29.88	50.11	29.85	30.27	18.48	40.97	48.98	87.06	50.66	24.47	2.49	2.13	1.6	1.6
		123.88	115.6	121.78	36.67	74.53	44.35	2.31	5.79	6.03	60.48	29.33	49.2	29.31	29.72	18.14	40.23	48.09	85.48	49.74	24.02	2.87	2.96	1.2	1.63
		118.86	109.97	116.81	39.37	80.04	47.62	2.48	6.22	6.48	64.94	31.5	52.84	31.48	31.91	19.48	43.2	51.64	91.79	53.41	25.8	3.52	1.97	1.17	1.51
		123.02	115.32	121.89	36.67	74.55	44.35	2.31	5.79	6.04	60.49	29.34	49.21	29.32	29.73	18.14	40.23	48.1	85.5	49.75	24.03	4.07	2.47	1.48	1.17
		114.02	105.44	112.9	35.72	72.62	43.21	2.25	5.64	5.88	58.92	28.58	47.94	28.56	28.96	17.67	39.19	46.86	83.28	48.46	23.41	3.52	1.47	1.41	1.5
		117.13	108.38	115.78	35.33	71.82	42.73	2.23	5.58	5.82	58.28	28.27	47.41	28.24	28.64	17.48	38.76	46.34	82.37	47.93	23.15	3.96	1.94	1.15	1.45
		116.53	108	115.15	37.28	75.79	45.09	2.35	5.89	6.14	61.5	29.83	50.03	29.81	30.22	18.45	40.9	48.9	86.92	50.58	24.43	3.08	2.15	1.38	1.11
		120.31	111.64	118.65	36.74	74.69	44.44	2.32	5.8	6.05	60.6	29.4	49.3	29.37	29.78	18.18	40.31	48.19	85.66	49.84	24.07	3.6	1.61	1.27	1.58
		114.85	106.51	113.28	39.42	80.14	47.68	2.49	6.23	6.49	65.03	31.54	52.9	31.52	31.96	19.5	43.25	51.71	91.91	53.48	25.83	2.5	0.78	1.19	1.35
		116.67	108.83	114.87	37.24	75.71	45.05	2.35	5.88	6.13	61.43	29.8	49.98	29.77	30.19	18.43	40.86	48.85	86.83	50.52	24.4	3.61	1.58	1.5	1.19
		125.53	117.23	124.3	37.07	75.35	44.83	2.34	5.85	6.1	61.14	29.66	49.74	29.63	30.05	18.34	40.67	48.62	86.42	50.28	24.29	2.28	2.3	1.44	1.47
		120.23	112.15	118.51	38.81	78.89	46.94	2.45	6.13	6.39	64.01	31.05	52.08	31.02	31.46	19.2	42.58	50.9	90.48	52.65	25.43	3.19	1.42	1.62	1.58
		118.42	110.66	117.59	36.41	74.02	44.04	2.3	5.75	5.99	60.06	29.13	48.86	29.11	29.52	18.02	39.95	47.76	84.9	49.4	23.86	2.53	1.18	1.61	1.58
		124.8	116.6	123.68	38.34	77.93	46.37	2.42	6.05	6.31	63.23	30.67	51.44	30.65	31.07	18.97	42.06	50.29	89.38	52.01	25.12	2.19	0.82	1.22	1.41
		123.57	115.83	121.51	38.48	78.22	46.54	2.43	6.08	6.33	63.47	30.79	51.64	30.76	31.19	19.04	42.22	50.47	89.71	52.2	25.21	4.38	0.78	1.43	1.41
		123.06	114.8	121.31	38.09	77.43	46.07	2.4	6.01	6.27	62.83	30.47	51.11	30.45	30.87	18.84	41.79	49.96	88.8	51.67	24.96	2.39	0.96	1.55	1.61
		115.34	107.05	113.6	35.96	73.1	43.5	2.27	5.68	5.92	59.32	28.77	48.26	28.75	29.15	17.79	39.45	47.17	83.84	48.78	23.56	4.08	2.61	1.22	1.14
		115.54	107.29	113.48	36.64	74.48	44.31	2.31	5.79	6.03	60.43	29.31	49.16	29.29	29.7	18.13	40.19	48.06	85.42	49.7	24.01	1.97	2.42	1.23	1.31
		112.52	103.84	110.98	35.32	71.8	42.72	2.23	5.58	5.81	58.26	28.26	47.4	28.24	28.63	17.48	38.75	46.33	82.35	47.92	23.14	2.23	1.86	1.43	1.25
		122.85	114.38	121.67	39.46	80.22	47.73	2.49	6.23	6.5	65.09	31.57	52.95	31.55	31.99	19.52	43.29	51.76	92	53.53	25.86	3.57	2.08	1.28	1.63
		125.27	117.46	124.38	37.58	76.39	45.45	2.37	5.93	6.19	61.99	30.07	50.43	30.04	30.46	18.59	41.23	49.29	87.61	50.98	24.62	3.34	2.01	1.28	1.42
		121.28	112.65	119.67	35.79	72.74	43.28	2.26	5.65	5.89	59.03	28.63	48.02	28.61	29.01	17.71	39.26	46.94	83.43	48.55	23.45	4.24	0.86	1.42	1.17
		118.02	110.35	116.18	37.19	75.61	44.98	2.34	5.87	6.12	61.35	29.76	49.91	29.73	30.15	18.4	40.8	48.79	86.71	50.46	24.37	3.66	1.54	1.59	1.41
		112.12	103.59	110.25	37.02	75.25	44.77	2.33	5.85	6.09	61.06	29.62	49.67	29.59	30.01	18.31	40.61	48.55	86.3	50.22	24.25	3.89	1.76	1.17	1.32
		112.07	103.61	111.05	35.66	72.49	43.13	2.25	5.63	5.87	58.82	28.53	47.85	28.51	28.91	17.64	39.12	46.77	83.14	48.38	23.36	2.08	0.74	1.19	1.34
		124.5	115.6	123.64	38.83	78.93	46.96	2.45	6.13	6.39	64.04	31.06	52.1	31.04	31.47	19.21	42.6	50.93	90.52	52.67	25.44	2.33	1.69	1.25	1.62
		119.84	111.71	118.54	37.9	77.05	45.84	2.39	5.99	6.24	62.52	30.32	50.86	30.3	30.72	18.75	41.58	49.72	88.37	51.42	24.83	2.69	1.68	1.37	1.14
		124.21	115.93	123.08	37.41	76.05	45.25	2.36	5.91	6.16	61.71	29.93	50.21	29.91	30.33	18.51	41.05	49.07	87.22	50.75	24.51	2.21	2.32	1.45	1.4
		117.31	109.56	115.82	38.28	77.81	46.3	2.41	6.04	6.3	63.14	30.62	51.36	30.6	31.03	18.94	41.99	50.21	89.24	51.93	25.08	2.02	2.12	1.52	1.41
		116.24	107.84	114.29	38.69	78.64	46.79	2.44	6.11	6.37	63.81	30.95	51.91	30.93	31.36	19.14	42.44	50.74	90.19	52.48	25.35	3.91	2.79	1.55	1.35
		125.9	117.34	124.09	37.46	76.15	45.31	2.36	5.92	6.17	61.79	29.97	50.27	29.95	30.37	18.54	41.1	49.14	87.34	50.82	24.55	2.61	1.82	1.63	1.58
		118.43	109.9	116.84	37.81	76.87	45.74	2.38	5.97	6.22	62.37	30.25	50.74	30.23	30.65	18.71	41.49	49.6	88.16	51.3	24.78	2.66	0.74	1.49	1.21
		114.65	106.79	112.95	36.71	74.63	44.4	2.31	5.8	6.04	60.56	29.37	49.27	29.35	29.76	18.16	40.28	48.16	85.59	49.8	24.05	2.38	2.77	1.4	1.35
		116.27	107.75	115.19	36.03	73.25	43.58	2.27	5.69	5.93	59.44	28.83	48.35	28.81	29.21	17.83	39.53	47.27	84.01	48.88	23.61	2.26	1.93	1.2	1.54
		121.72	114.08	119.95	38.81	78.89	46.94	2.45	6.13	6.39	64.01	31.05	52.08	31.02	31.46	19.2	42.58	50.9	90.48	52.65	25.43	4.34	2.62	1.18	1.32
		121.93	114.27	120.29	39.2	79.69	47.41	2.47	6.19	6.45	64.66	31.36	52.6	31.34	31.77	19.39	43.01	51.42	91.39	53.18	25.68	3.74	2.82	1.25	1.65
		118.87	110.82	116.99	39.38	80.04	47.62	2.48	6.22	6.48	64.95	31.5	52.84	31.48	31.92	19.48	43.2	51.65	91.8	53.42	25.8	3.43	1.88	1.46	1.55
		124.68	116.67	123.69	38.17	77.58	46.16	2.41	6.03	6.28	62.95	30.54	51.22	30.51	30.94	18.88	41.87	50.06	88.98	51.78	25.01	3.58	2.73	1.34	1.43
		116.67	108.76	115.85	39.4	80.09	47.66	2.48	6.22	6.49	64.99	31.52	52.87	31.5	31.94	19.49	43.23	51.68	91.86	53.45	25.82	4.08	2.52	1.19	1.29
		127.24	119.14	125.79	42.35	86.09	51.22	2.67	6.69	6.97	69.86	33.88	56.83	33.86	34.33	20.95	46.46	55.55	98.74	57.45	27.75	2.74	1.67	1.29	1.57
		118.01	109.63	116.72	36.28	73.74	43.88	2.29	5.73	5.97	59.84	29.02	48.68	29	29.4	17.95	39.8	47.58	84.57	49.21	23.77	4.13	0.87	1.13	1.55
		112.47	104.48	111.05	37.43	76.08	45.27	2.36	5.91	6.16	61.73	29.94	50.22	29.92	30.34	18.52	41.06	49.09	87.25	50.77	24.52	2.74	1.74	1.39	1.55
		114.71	106.49	112.73	36.43	74.06	44.07	2.3	5.75	6	60.09	29.15	48.89	29.13	29.53	18.03	39.97	47.79	84.94	49.42	23.87	3.48	2.03	1.58	1.17
		120.9	112.03	119.73	35.8	72.77	43.3	2.26	5.65	5.89	59.05	28.64	48.04	28.62	29.02	17.71	39.27	46.96	83.46	48.56	23.46	3.51	2.76	1.59	1.63
		112.23	104.45	110.57	39.51	80.32	47.79	2.49	6.24	6.5	65.18	31.61	53.03	31.59	32.03	19.55	43.35	51.83	92.12	53.6	25.89	2.34	0.98	1.45	1.42
		124.48	115.77	123.3	36.63	74.46	44.3	2.31	5.78	6.03	60.42	29.3	49.15	29.28	29.69	18.12	40.18	48.04	85.39	49.69	24	3.17	1.26	1.55	1.63
		118	109.15	116	37.85	76.93	45.77	2.39	5.98	6.23	62.43	30.28	50.79	30.26	30.68	18.72	41.52	49.64	88.24	51.34	24.8	2.31	2.75	1.61	1.41
		125.28	117.49	123.53	36.29	73.78	43.9	2.29	5.73	5.97	59.87	29.04	48.7	29.02	29.42	17.96	39.82	47.61	84.62	49.24	23.78	4.07	2.28	1.32	1.33
		113.7	105.97	112.19	35.43	72.02	42.85	2.23	5.59	5.83	58.44	28.35	47.55	28.32	28.72	17.53	38.87	46.47	82.6	48.06	23.21	3.75	1.99	1.29	1.16
		113.74	106.21	112.14	38.04	77.32	46.01	2.4	6.01	6.26	62.74	30.43	51.04	30.41	30.83	18.82	41.73	49.89	88.68	51.6	24.92	3.37	2.16	1.16	1.2
		120.97	112.85	119.63	36.84	74.88	44.55	2.32	5.82	6.06	60.76	29.47	49.43	29.45	29.86	18.22	40.41	48.32	85.88	49.97	24.13	2.77	1	1.64	1.59
		120.14	112.17	118.32	37.88	77.01	45.82	2.39	5.98	6.24	62.49	30.31	50.84	30.29	30.71	18.74	41.56	49.69	88.32	51.39	24.82	2.52	2.32	1.55	1.33
		122.36	114.85	121.54	38.55	78.36	46.63	2.43	6.09	6.35	63.59	30.84	51.73	30.82	31.25	19.07	42.29	50.57	89.88	52.3	25.26	2.9	1.94	1.54	1.4
		116.7	108.41	115.89	36.16	73.5	43.73	2.28	5.71	5.95	59.64	28.93	48.52	28.91	29.31	17.89	39.67	47.43	84.3	49.05	23.69	2.96	2.01	1.21	1.42
		125	117.45	123.98	37.45	76.13	45.3	2.36	5.91	6.16	61.77	29.96	50.26	29.94	30.36	18.53	41.09	49.12	87.31	50.8	24.54	3.03	1.37	1.47	1.6
		138.22	130.72	137.06	45.15	91.77	54.6	2.85	7.13	7.43	74.47	36.12	60.58	36.09	36.59	22.34	49.53	59.22	105.25	61.24	29.58	2.5	1.93	1.79	1.74
		132.7	124.82	130.81	41.4	84.16	50.08	2.61	6.54	6.81	68.29	33.12	55.56	33.1	33.56	20.48	45.42	54.31	96.52	56.16	27.13	4.25	1.1	1.52	1.6
		128.66	120.55	127.59	41.56	84.47	50.26	2.62	6.56	6.84	68.55	33.25	55.76	33.22	33.68	20.56	45.59	54.51	96.88	56.37	27.23	4.47	2.7	1.73	1.25
		137.77	129.32	136.87	44.52	90.5	53.84	2.81	7.03	7.33	73.43	35.62	59.74	35.59	36.08	22.03	48.84	58.39	103.79	60.39	29.17	4.56	1.75	1.79	1.77
		133.13	124.41	131.65	44.3	90.05	53.58	2.79	7	7.29	73.07	35.44	59.44	35.41	35.91	21.92	48.6	58.1	103.28	60.09	29.02	2.41	0.81	1.7	1.44
		127.15	119.34	126.14	41.6	84.56	50.31	2.62	6.57	6.85	68.62	33.28	55.82	33.26	33.72	20.58	45.64	54.57	96.99	56.43	27.26	4.25	2.5	1.52	1.5
		129.62	121.52	127.85	41.42	84.21	50.1	2.61	6.54	6.82	68.33	33.14	55.59	33.12	33.58	20.49	45.45	54.34	96.58	56.19	27.14	2.79	2.85	1.26	1.31
		127.91	119.49	126.17	45.33	92.14	54.82	2.86	7.16	7.46	74.77	36.27	60.83	36.24	36.74	22.43	49.73	59.46	105.68	61.49	29.7	2.54	2.21	1.48	1.45
		136.49	126.79	134.48	40.1	81.52	48.5	2.53	6.33	6.6	66.15	32.08	53.81	32.06	32.51	19.84	44	52.6	93.49	54.4	26.27	2.84	3.11	1.4	1.68
		130.57	121.6	129.57	40.58	82.49	49.08	2.56	6.41	6.68	66.94	32.47	54.46	32.44	32.89	20.08	44.52	53.23	94.61	55.05	26.59	2.54	0.85	1.39	1.49
		128.5	119.81	126.94	41.3	83.96	49.95	2.6	6.52	6.8	68.13	33.04	55.42	33.02	33.48	20.43	45.31	54.17	96.29	56.03	27.06	2.89	1.08	1.25	1.47
		139.54	130.47	138.73	43.76	88.95	52.92	2.76	6.91	7.2	72.18	35.01	58.72	34.98	35.47	21.65	48.01	57.4	102.02	59.36	28.67	3.26	1.07	1.44	1.54
		131.04	123.17	129.37	41.65	84.67	50.38	2.63	6.58	6.86	68.7	33.32	55.89	33.3	33.76	20.61	45.69	54.63	97.1	56.5	27.29	3.35	1.02	1.47	1.58
		133.56	125.73	131.94	43.75	88.94	52.92	2.76	6.91	7.2	72.17	35	58.71	34.98	35.46	21.65	48	57.39	102	59.35	28.67	3.68	1.35	1.38	1.47
		129.65	121.74	127.89	44.62	90.71	53.97	2.81	7.05	7.35	73.61	35.7	59.88	35.67	36.17	22.08	48.96	58.53	104.04	60.54	29.24	3.83	2.06	1.54	1.72
		133.83	124.61	131.97	45.59	92.67	55.14	2.87	7.2	7.5	75.2	36.47	61.18	36.45	36.95	22.56	50.02	59.8	106.29	61.84	29.87	3.4	0.8	1.78	1.49
		144.87	136.91	143.75	41.88	85.14	50.66	2.64	6.61	6.89	69.08	33.51	56.2	33.48	33.95	20.72	45.95	54.94	97.65	56.82	27.44	4.46	1.47	1.61	1.67
		143.21	135.06	141.53	41.73	84.82	50.47	2.63	6.59	6.87	68.82	33.38	55.99	33.36	33.82	20.64	45.78	54.73	97.28	56.6	27.34	3.6	2.14	1.8	1.71
		143.86	135.43	141.91	43.99	89.42	53.2	2.77	6.95	7.24	72.56	35.19	59.03	35.16	35.65	21.76	48.26	57.7	102.55	59.67	28.82	4.85	1.57	1.46	1.53
		129.9	122.02	128.34	42.63	86.66	51.56	2.69	6.73	7.02	70.32	34.11	57.21	34.08	34.55	21.09	46.77	55.92	99.39	57.83	27.93	3.97	2.67	1.58	1.71
		136.78	127.26	135.76	41.55	84.47	50.26	2.62	6.56	6.84	68.54	33.24	55.76	33.22	33.68	20.56	45.59	54.5	96.88	56.37	27.23	2.98	1.27	1.35	1.64
		137.95	130.1	136.81	40.35	82.02	48.8	2.54	6.37	6.64	66.55	32.28	54.14	32.25	32.7	19.96	44.26	52.92	94.06	54.73	26.44	4.07	2.59	1.38	1.75
		128.47	120.31	127.65	40.65	82.63	49.16	2.56	6.42	6.69	67.05	32.52	54.55	32.5	32.95	20.11	44.6	53.32	94.77	55.14	26.63	3.18	2.09	1.63	1.5
		144.33	135.07	142.27	42.43	86.24	51.31	2.67	6.7	6.98	69.98	33.94	56.93	33.92	34.39	20.99	46.55	55.65	98.91	57.55	27.8	3.88	2.8	1.75	1.8
		129.45	120.31	127.93	41.96	85.3	50.76	2.65	6.63	6.91	69.22	33.57	56.31	33.55	34.02	20.76	46.04	55.04	97.84	56.93	27.5	2.39	0.95	1.4	1.43
		130.47	120.2	128.53	41.5	84.36	50.19	2.62	6.55	6.83	68.45	33.2	55.69	33.18	33.64	20.53	45.53	54.43	96.75	56.3	27.19	2.31	2.6	1.68	1.48
		132.12	122.06	131.29	41.47	84.3	50.16	2.61	6.55	6.83	68.41	33.18	55.65	33.15	33.62	20.52	45.5	54.4	96.69	56.26	27.17	3.67	2.21	1.75	1.36
		141.46	132.35	140.06	40.2	81.72	48.62	2.53	6.35	6.62	66.31	32.16	53.95	32.14	32.59	19.89	44.11	52.73	93.73	54.54	26.34	3.26	1.36	1.84	1.45
		142.81	133.02	141.03	42.19	85.76	51.03	2.66	6.66	6.94	69.59	33.76	56.62	33.73	34.2	20.87	46.29	55.34	98.36	57.23	27.64	2.89	1.74	1.46	1.66
		144.28	134.03	143.28	40.79	82.91	49.33	2.57	6.44	6.71	67.28	32.63	54.73	32.61	33.06	20.18	44.75	53.5	95.09	55.33	26.72	4.22	2.42	1.84	1.42
		138.2	127.74	136.93	40.22	81.75	48.64	2.54	6.35	6.62	66.34	32.18	53.97	32.15	32.6	19.9	44.12	52.75	93.76	54.56	26.35	3.54	2.5	1.37	1.68
		138.29	127.64	136.19	42.31	86.01	51.17	2.67	6.68	6.96	69.79	33.85	56.78	33.82	34.3	20.93	46.42	55.5	98.64	57.4	27.72	3.63	1.07	1.37	1.63
		131.57	122.18	129.49	45.77	93.04	55.36	2.89	7.23	7.53	75.5	36.62	61.42	36.59	37.1	22.65	50.22	60.04	106.71	62.09	29.99	3.34	1.73	1.43	1.68
		145.36	135.81	143.91	45.28	92.05	54.77	2.85	7.15	7.45	74.69	36.23	60.76	36.2	36.7	22.4	49.68	59.39	105.57	61.43	29.67	4.75	1.13	1.57	1.5
		136.89	128.14	135.21	39.96	81.22	48.33	2.52	6.31	6.58	65.91	31.97	53.62	31.94	32.39	19.77	43.84	52.41	93.16	54.2	26.18	3.22	1.56	1.53	1.68
		133.87	123.35	132.29	42.28	85.95	51.14	2.67	6.68	6.96	69.74	33.83	56.74	33.8	34.27	20.92	46.39	55.46	98.58	57.36	27.7	4.4	2.92	1.47	1.41
		129.49	119.33	127.47	40.08	81.47	48.47	2.53	6.33	6.6	66.1	32.06	53.78	32.04	32.48	19.83	43.97	52.57	93.43	54.37	26.26	3.56	2.64	1.33	1.4
		132.09	120.69	130.37	46.04	93.6	55.69	2.9	7.27	7.58	75.95	36.84	61.79	36.81	37.32	22.78	50.52	60.4	107.35	62.46	30.17	4.2	2.86	1.36	1.68
		135.18	124.22	133.89	44.05	89.54	53.28	2.78	6.96	7.25	72.66	35.24	59.11	35.21	35.71	21.79	48.33	57.78	102.7	59.76	28.86	4.62	2.09	1.52	1.43
		140.25	130.43	138.17	44.07	89.58	53.3	2.78	6.96	7.25	72.69	35.26	59.14	35.23	35.72	21.8	48.35	57.8	102.74	59.78	28.87	4.31	2.09	1.57	1.43
		143.39	132.62	142.02	43.24	87.9	52.3	2.73	6.83	7.12	71.33	34.6	58.03	34.57	35.05	21.39	47.44	56.72	100.82	58.66	28.33	3.59	1.48	1.61	1.57
		136.85	126.2	135.28	45.6	92.69	55.15	2.87	7.2	7.5	75.21	36.48	61.19	36.45	36.96	22.56	50.02	59.81	106.3	61.85	29.87	4.55	2.84	1.38	1.65
		128.86	117.57	127.64	41.03	83.41	49.63	2.59	6.48	6.75	67.68	32.83	55.06	32.8	33.26	20.3	45.02	53.82	95.66	55.66	26.88	4.23	1.75	1.51	1.62
		141.45	131.59	140.38	43.04	87.49	52.06	2.71	6.8	7.08	71	34.44	57.76	34.41	34.89	21.29	47.22	56.46	100.35	58.39	28.2	3.72	3.03	1.48	1.7
		140.22	130.73	139.4	43.9	89.23	53.09	2.77	6.93	7.23	72.4	35.12	58.91	35.09	35.58	21.72	48.16	57.58	102.34	59.55	28.76	2.94	3.03	1.86	1.43
		145.34	134.38	143.77	45.54	92.58	55.08	2.87	7.19	7.5	75.12	36.44	61.11	36.41	36.91	22.53	49.96	59.74	106.18	61.78	29.84	4.15	1.52	1.85	1.67
		151.33	141.99	150	47.74	97.05	57.74	3.01	7.54	7.86	78.75	38.2	64.06	38.17	38.7	23.62	52.38	62.62	111.3	64.76	31.28	4.32	2.54	1.85	1.88
		149.77	140.09	148.6	46.69	94.91	56.47	2.94	7.37	7.69	77.02	37.36	62.66	37.33	37.85	23.1	51.23	61.24	108.86	63.34	30.59	4.9	2.4	1.48	1.93
Scylla tranquebarica	Female	95.02	89.74	94.06	32.37	63.21	36.44	2.03	4.18	4.72	49.69	40.08	36.41	28.85	30.06	14.07	29.45	23.75	60.9	34.35	14.92	2.1	2.16	2.25	1.78
		95.02	90.39	93.63	30.38	62.53	36.75	2.14	4.33	4.79	47.71	38.54	36.11	27.71	30.63	14.09	29.12	21.83	60.47	35.65	14.83	3.47	3.02	2.42	1.69
		95.05	90.31	93.39	30.39	59.7	36.28	2.02	4.25	4.78	46.78	40.19	36.71	28.21	30.22	14.92	27.42	22.02	58.93	36.35	13.82	2.73	2.8	3.05	2.27
		95.09	90.2	93.97	31.08	64.34	35.95	1.99	4.28	4.53	50.4	39.21	35.53	29.63	28.46	14.22	28.72	21.87	57.12	35.6	14.86	3.45	2.9	2.34	1.63
		95.1	90.19	94.11	31.25	63	37.5	2.11	4.53	4.54	49.64	38.95	37.26	29.4	28.98	14.49	29.93	22.76	60.46	35.75	14.74	2.27	2.58	2.6	1.43
		95.31	91.21	94.23	30.92	64.19	37.77	2.06	4.37	4.69	47.3	39.01	35.54	29.26	30.26	14	27.69	22.37	60.41	34.4	14.6	3.04	2.55	2.11	1.65
		95.32	90.6	94.02	32.69	60.92	34.96	2.15	4.41	4.72	49.29	41.44	37.65	27.35	29.03	13.83	28.88	23.13	61.23	34.69	14.1	3.33	3.06	2.29	1.62
		95.34	90.67	93.84	31.87	61.2	35.16	2.1	4.32	4.43	48.51	39.16	37.63	27.4	30.03	14.48	27.43	23.36	59.2	34.45	13.61	2.98	2.46	2.36	1.35
		95.36	91.27	94.42	31.58	59.45	37.47	2.03	4.27	4.42	47.63	42.13	36.74	28.09	30.88	14.67	28.47	22.01	61.33	34.84	14.38	2.67	2.99	2.9	2.05
		95.37	90.81	94.05	31.13	62.01	35.34	2	4.49	4.77	47.9	39.7	38.36	29.7	29.18	14.14	27.98	21.82	58.24	36.29	13.84	3.24	2.11	2.51	1.71
		95.38	91.4	93.73	31.99	61.2	35.47	2.12	4.18	4.47	49.69	39.37	38.46	28.34	29.61	14.87	29.8	22.02	59.58	36.32	13.68	2.28	2.09	2.82	1.46
		95.43	91	93.78	31.94	61.84	35.29	2.1	4.19	4.4	49.95	41.45	37.06	28.58	29.93	14.11	28.69	23.87	57.24	34.91	14.87	2.14	2.08	2.25	1.68
		95.44	91.24	94.15	32.16	60.64	35.95	2.07	4.49	4.49	46.55	42.08	37.34	28.47	29.15	14.8	28.85	21.93	60.61	36.09	14.56	3.08	2.74	2.43	2.23
		95.45	90.67	94.54	30.39	60.96	37.09	2.01	4.27	4.42	47.76	42.01	35.56	28.42	30.75	15.07	29.27	23.31	58.47	35.83	14.27	3.04	2.33	2.08	2.08
		95.47	91.3	93.86	30.94	63.95	35.88	2.04	4.3	4.6	46.81	40.67	37.93	28.67	28.71	14.53	29.28	22.84	57.43	34.32	14.53	2.5	2.31	2.28	1.95
		95.56	90.42	94.3	32.84	60.78	37.84	2.09	4.39	4.69	50.83	41.95	38.18	29.41	29.65	13.86	28.66	23.48	57.08	36.39	14.41	2.26	2.87	2.17	1.8
		95.56	90.48	94.52	32.81	59.37	37.14	2.03	4.35	4.58	46.65	39.83	36.91	27.68	29.64	14.49	30	23.46	56.46	35.5	13.99	3.34	2.24	2.01	1.47
		95.58	90.59	94.49	30.9	60.59	35.4	2.12	4.31	4.63	47.49	40.31	36.71	27.74	29.18	15	28.32	23.13	56.88	33.67	14.16	2.97	2.21	2.76	1.81
		95.74	90.57	94.65	30.74	60.3	35.31	2.13	4.52	4.79	47.23	41.41	38.8	28.38	28.39	14.86	28.94	22.03	58.3	34.93	13.61	2.36	1.93	2.17	1.9
		95.75	90.71	94.72	30.7	63.16	37.52	2.16	4.37	4.53	47.5	41.92	38.44	27.67	29.97	14.56	28.15	22.53	57.32	35.53	14.65	2.8	2.14	2.1	2.12
		95.81	91.42	94.48	31.22	59.47	36.33	2.08	4.55	4.45	47.99	41.74	36.46	28.94	28.33	14.5	29.69	22.72	57.5	35.26	14.01	2.49	3.04	2.62	1.45
		95.82	91.49	94.43	30.62	59.93	37.97	2.09	4.32	4.76	49.95	41.35	38.59	28.12	28.3	14.21	28.35	23.77	61.57	33.63	14.35	3.21	1.92	2.83	1.24
		95.84	90.88	94.44	32.25	59.72	38	2.08	4.43	4.74	47.87	40.44	37.97	29.41	28.42	14.7	29.71	22.92	57.14	34.59	14.07	2.64	2.61	2.79	1.77
		95.86	91.31	94.22	30.74	62.72	36.05	2.07	4.33	4.61	50.7	39.46	38.43	29.54	28.48	14.67	28.01	22.11	57.13	35.68	14.4	2.54	2.72	2.66	2.29
		95.9	91.29	94.9	31.42	61.37	35.78	2.04	4.38	4.65	50.67	40.21	36.44	29.32	30.66	14.05	28.02	22.27	61.02	34.14	14.54	2.54	2.42	2.82	2.02
		95.9	91.59	94.87	30.87	62.19	37.71	2.05	4.38	4.61	49	40.97	38.45	27.36	29.28	14.98	28.35	23.88	56.69	35.54	14.59	2.19	2.95	2.62	1.94
		95.97	91.39	95.01	31.16	63.54	38.06	2.07	4.48	4.69	50.9	39.82	38.26	28.51	28.94	14.93	28.31	22.65	59.93	34.53	13.96	2.97	2.52	2.68	2.01
		96	90.93	94.46	32.89	59.66	35.71	2.17	4.53	4.49	49.04	40.6	35.65	29.25	29.54	14.72	28.46	22.32	60.21	34.9	14.92	2.31	3.07	2.98	1.32
		96	91.1	95	30.38	60.91	37.65	2.17	4.46	4.63	48.16	39.07	36.95	28.78	30.84	13.97	28.7	23.52	58.23	33.87	14.09	2.64	2.49	2.02	1.9
		96.01	91.09	94.59	30.89	59.7	37.96	2.02	4.48	4.41	50.05	40.19	38.89	27.83	30.97	14.17	28.96	23.36	58.34	34.37	14.18	2.29	3.03	2.83	1.37
		96.01	92.06	94.98	32.59	59.27	35.39	2.04	4.24	4.42	47.05	38.91	37.15	29.34	30.18	13.96	28.29	23.34	57.96	36.47	14.64	3.11	3.06	2.98	1.65
		96.01	91.22	94.91	30.54	60.04	37.62	2.11	4.51	4.82	47.68	41.62	36.65	29.69	30.83	14.18	30.02	22.51	56.92	35.83	13.76	3.01	2.77	3.01	1.99
		96.08	91.75	95.12	33.02	62.78	37.82	2.09	4.22	4.4	49.28	39.05	38.77	28.08	28.88	14.42	29.44	22.66	58.53	33.65	14.09	3.07	2.93	3.05	2.08
		96.09	91.87	95.07	32.67	61.11	36.53	1.99	4.17	4.75	48.15	40.26	36.47	28	30.26	14.6	29.48	22.11	60.1	36.59	14.29	2.27	2.74	2.84	1.64
		96.26	91.24	95.13	32.03	64.27	35.77	1.99	4.53	4.78	49.36	41.3	37.3	28.7	29.69	13.81	29.12	23.63	60.74	34.44	13.69	2.4	3.07	2.24	2.1
		96.24	90.68	95.04	33.51	62.49	35.5	2.35	4.26	4.22	49.26	34.88	33.01	20.18	29.06	16.77	24.85	18.42	48.13	30.18	14.89	2.18	2.41	3.03	1.33
		96.32	91.77	94.96	30.42	66.61	35.46	2.37	4.65	4.82	49.94	35.52	33.84	22.47	29.36	15.82	23.09	20.62	48.62	26.57	14.13	2.85	2.04	2.63	1.93
		96.36	91.91	94.91	30.32	65.84	37.01	2.36	4.41	5.09	48.17	33.75	33.55	21.12	28.99	16.49	25.22	19.97	48.19	29.49	12.98	3.26	2.19	2.06	1.78
		96.78	91.67	95.38	30.31	62.53	36.4	2.39	3.81	4.94	49.55	35.13	33.05	23.76	28.63	13.5	24.94	18.31	48.14	26.42	13.71	3.38	2.49	2.83	1.85
		96.9	91.52	95.85	30.9	64.2	36.66	2.35	4.25	4.47	48	33.55	34.88	22.1	28.35	15.27	25.8	20.42	51.17	30.21	13.22	3.18	3.17	2.62	1.51
		96.93	92.91	95.53	30.62	64.2	33.69	2.38	4.1	5.59	50.04	35.58	34.1	21.01	30.64	15.26	23.96	18.89	50.76	30.64	15.02	3.15	2.17	2.17	2.11
		96.97	91.57	95.85	32.77	65.66	35.06	2.39	5.04	5.24	48.37	33.89	35.93	20.2	28.4	14.72	27.32	18.19	51.27	29.5	11.66	2.83	2.6	2.59	1.46
		96.99	92.63	95.74	30.76	64.94	33.49	2.34	4.3	4.55	48.12	33.64	35.64	23.9	31.05	14.73	23.34	20.85	48.32	26.97	12.21	2.8	2.01	2.14	2.27
		97.16	92.49	96.02	31.69	63.63	37.61	2.43	4.84	4.31	48.67	34.15	34.56	20.6	30.27	16.07	26.84	21.05	48.36	30.17	12.85	3.01	2.41	2.79	1.61
		97.22	92.03	95.93	30.63	63.55	33.9	2.44	3.94	4.35	51.68	37.13	33.41	20.06	29.63	15.84	25.86	18.36	52.7	30.08	13.05	2.3	3.3	2.59	1.99
		97.26	91.64	96.15	32.4	64.22	34.29	2.41	4.71	4.86	51.68	37.12	32.57	21.05	27.65	13.64	25.99	18.68	50.29	27.52	12.09	3.48	2.71	2.74	1.97
		97.28	92.16	96.25	33.85	66.4	36.62	2.46	5.02	4.92	49.08	34.5	36.26	24.21	28.62	15.31	25.83	19.68	49.52	30.91	12.29	2.81	2.41	2.68	2.4
		97.34	91.47	95.76	32.54	64.75	35.77	2.44	3.75	5.32	48.72	34.14	34.4	21.76	29.69	15.15	26.23	21.66	51.06	30.69	14.4	2.36	2.31	2.98	2.01
		97.42	91.57	96.08	33.68	64.09	37.36	2.4	4.13	4.43	51.09	36.5	35.03	23.99	28.2	16.33	26.3	21.45	50.1	26.69	14.29	3.32	2.05	2.72	2.37
		97.54	93.39	96.59	33.69	66.82	36.12	2.38	4.67	5.37	51.31	36.72	32.9	22.6	28.85	15.8	25.55	21.14	49.11	30.24	13.62	3.29	2.29	3.07	1.85
		97.75	92.45	96.44	30.37	67.67	33.8	2.41	4.34	5.14	49.14	34.5	33.22	20.77	30.07	16.89	24.4	20.99	51.96	28.02	15.17	2.65	1.93	2.54	1.66
		97.76	93.48	96.78	32.8	66.27	36.36	2.39	4.22	5.52	49.04	34.39	36	20.73	28.52	14.28	27.39	21.24	48.88	29.46	15.34	2.74	2.8	2.64	2.27
		97.81	93.1	96.41	30.29	64.6	37.04	2.43	3.77	4.56	52.29	37.63	36.61	24.19	28.18	15.95	23.61	20.56	52.85	29.36	14.78	3.29	2.01	2.7	1.58
		97.97	93.12	97.04	31.61	65.42	37.2	2.47	4.02	4.56	49.2	34.5	33.18	21.5	28.25	17.12	27.32	21.56	52.73	27.72	15.68	3.25	3.25	2.37	1.46
		98.28	92.6	96.74	32	64.03	36.61	2.38	4.44	4.73	50.34	35.62	34.8	24.39	31.13	15	27.08	18.9	52.45	29.72	16.03	2.17	2.66	3.11	1.56
		98.37	93.35	97.38	34.08	65.67	37.8	2.45	4.85	4.44	52.41	37.69	35.62	20.99	31.39	13.67	25.25	21.86	51.63	29.09	12.45	3.18	2.04	2.58	1.94
		98.42	93.69	96.85	30.65	67.03	36.91	2.39	4.22	4.45	48.89	34.16	36.86	23.61	31.16	14.95	26.67	19.41	52.27	29.45	14.98	2.61	3.25	2.97	1.7
		98.47	93.48	97.42	33.85	65.53	34.46	2.43	4.57	5.22	49.75	34.99	33.7	21.17	28.97	16.86	25.11	21.45	52.21	28.43	12.83	2.89	3.14	2.43	1.91
		98.5	94.02	97.14	33.67	68.26	35.02	2.41	5.06	4.59	49.83	35.07	33.3	22.4	31.57	14.33	26.3	22.11	52.58	31.14	12.55	2.48	2.31	2.5	2.45
		98.51	94.5	97.36	32.39	64.23	36.87	2.46	4.84	4.38	49.29	34.53	35.35	24.2	30.88	15.97	25.26	19.17	50.29	30.9	14.69	2.7	3.33	3.03	1.78
		98.52	93.87	96.99	32.53	64.63	34.44	2.47	4.08	5.63	48.75	33.98	35.14	21.55	28.49	16.29	25.51	21.58	52.22	28.23	12.57	2.98	2.55	2.91	2.08
		98.58	93.19	97.2	31.63	66.82	35.72	2.44	4.01	4.78	50.22	35.45	34.67	20.54	32.05	15.71	26.55	22.03	52.89	29.28	16	2.51	2.74	2.44	2.29
		98.68	93.9	97.5	31.3	66.46	34.97	2.47	4.76	4.35	52.14	37.36	33.38	21.54	30.62	17.09	27.79	18.68	53	27.19	13.03	3.35	2.87	2.57	1.82
		98.79	93.66	97.32	30.9	68.38	38.02	2.4	5.01	5.6	49.37	34.55	36.93	22.02	31.85	16.85	25.15	18.19	51.66	28.37	13.21	2.97	2.5	3.05	1.78
		98.81	94.64	97.56	33.35	68.49	35.64	2.45	4.72	4.36	49.5	34.69	34.58	23.96	31.4	14.86	24.59	20.48	52.41	30.69	13.83	3.43	2.23	2.91	1.47
		98.82	93.36	97.52	31.62	66.81	38.07	2.43	4.96	5.12	49.95	35.13	34.19	23.46	31.01	13.18	25.72	19.9	51.73	31.04	15.1	2.53	2.94	2.92	1.88
		98.84	94	97.54	33.44	66.85	36.09	2.48	4.18	4.43	51.76	36.94	34.59	24.28	28.95	16.15	24.03	19.08	50.64	27.53	12.71	3.27	2.08	3.09	1.53
		98.9	94.73	97.58	33.22	66.63	36.18	2.48	4.94	5.25	49.83	35.01	35.62	23.78	31.96	13.56	26.89	20.62	50.84	27.41	14.4	2.96	3.01	2.89	2.37
		99.06	93.71	98.1	31.09	67.8	38.19	2.43	5.17	5.43	49.74	34.85	34.83	23.1	30.69	17.11	24.81	19.29	51.08	30.66	15.93	2.22	2.48	2.41	2.42
		99.08	93.66	97.76	32.55	67.8	37.89	2.49	4.4	4.66	52.82	37.92	33.31	21.26	31.28	16.86	26.76	18.56	50.34	30.04	13.85	3.46	3.27	2.88	2.3
		99.25	93.39	98.03	31.13	68.46	35.36	2.49	5.12	4.89	52.63	37.71	34.78	20.95	29.46	13.51	26.64	19.51	51.41	31.15	13.64	2.39	2.43	2.68	1.83
		99.25	93.91	97.76	32.2	66.82	36.03	2.52	4.26	5.52	51.21	36.29	34.55	21.38	31.86	17.09	25.98	19.15	53.94	27.63	12.72	2.41	2.29	2.59	2.04
		99.33	93.48	98.39	33.26	68.67	37.28	2.44	5.11	5.54	50.38	35.45	34.12	23.37	31.73	15.42	25.54	20.63	50.66	29.87	12.05	3.1	2.24	2.29	1.68
		99.38	95.16	98.23	31.22	67.91	37.99	2.52	5.1	5.38	50.93	36	34.55	24.05	30.21	16.9	26.93	18.42	53.69	29.74	13.45	2.71	2.95	2.64	2.44
		99.41	94.57	97.69	34.59	68.92	37.91	2.5	4.58	5.76	49.43	34.49	33.79	21.57	29.13	16.51	24.42	21.15	52.09	30.3	13.55	2.52	2.7	2.58	1.79
		99.58	94.99	98.38	33.34	65.69	35.55	2.48	4.95	5.27	52.49	37.52	36.36	23.14	30.9	16.53	26.91	21.8	54	30.38	16.33	3.53	2.15	3.07	2.4
		99.58	94	97.9	32.45	68.98	34.91	2.46	4.87	5.01	51.78	36.81	33.9	23.89	32.38	14.93	28.27	21.18	53.06	31.55	13.38	3.39	2.32	2.49	2.23
		99.77	93.94	98.57	33.45	67.04	36.32	2.49	4	4.93	52.22	37.22	33.62	22.56	31.07	17.43	28.26	21.9	50.45	30.09	12.18	2.24	2.59	2.94	2.35
		99.82	94.25	98.9	33.55	67.75	37.65	2.46	3.88	5.18	51.6	36.6	37.05	22.46	29.5	14.65	25.32	19.87	51.37	31.6	16.17	2.99	3.02	2.58	2.2
		99.83	94.79	98.23	31.76	66.19	35.69	2.48	5.23	5.53	51.54	36.53	36.92	20.67	30.14	14.1	27.44	20.21	53.51	28.34	13.7	2.53	2.38	2.8	1.65
		99.84	94.66	99	33.8	66.94	37.1	2.49	3.91	4.67	49.39	34.37	35.78	23.95	31.98	14.93	25.48	19.08	52.59	31.27	14.64	2.49	3.15	3.11	1.83
		99.87	94.54	98.05	33.11	68.9	37.03	2.45	4.77	4.85	52.97	37.9	34.82	22.51	30.04	17.39	26.61	21.03	54.39	28.17	13.31	2.49	3.29	2.97	2.04
		99.94	95.9	98.72	34.06	66.32	35.72	2.5	4.2	4.52	51.23	36.16	34.93	22.84	28.47	15.65	24.41	18.62	53.5	31.53	12.3	3.14	3.32	2.57	1.74
		99.95	94.99	98.55	32.42	67.62	34.83	2.43	4.03	4.89	51.38	36.29	36.4	23.31	29.82	17	24.52	18.9	51.23	30.35	14.34	3.11	3.07	2.26	2.16
		100	94.52	98.9	35.21	68.44	38.52	2.51	4.14	5.33	53.02	37.93	37.05	24.99	31.88	13.91	24.99	21.69	50.52	31.49	13.62	2.22	2.5	2.44	1.98
		100.01	96	98.71	31.43	67.11	38.9	2.45	4.4	5.7	52.24	37.14	34.43	24.11	30	14.88	27.63	19.1	50.32	28.62	12.67	2.83	3.03	2.38	1.97
		100.05	94.15	99.13	35.41	69.56	37.34	2.54	4.08	4.66	50.79	35.69	37.29	23.22	30.98	13.75	27.53	20.82	51.68	29.35	14.2	2.32	2.52	2.79	2.27
		100.58	92.2	98.78	34.52	68.82	39.06	2.48	4.85	5.59	51.97	36.82	36.19	21.82	31.17	15.42	27.67	20.64	51.14	31.45	12.25	2.43	3.12	2.82	2.19
		100.74	95	99.77	35.42	69.68	35.88	2.5	5.17	4.97	50.08	34.93	36.86	21.66	32.31	14.1	26.87	20.33	51.3	30.43	13.29	2.89	2.3	2.14	2.15
		100.78	94.72	99.35	31.69	67.29	37.55	2.52	4.17	5.04	53.42	38.26	35.44	24.88	30.45	17.72	27.38	20.53	54.51	30.4	12.94	2.79	2.6	3.15	1.38
		100.94	94.15	99.79	32.44	66.88	37.88	2.55	4.48	4.85	52.96	37.79	34.54	21.55	29.33	17.7	27.51	20.48	52.55	29.41	12.83	2.73	2.68	2.88	2.07
		100.99	94.18	100	33.69	66.44	37.97	2.52	5.05	5.09	52.14	36.97	36.84	22.69	31.33	14.94	28.55	19.29	54.24	31.84	12.64	3.21	3.21	2.5	2.29
		101.14	95.65	99.6	34.96	67.69	36.94	2.53	4.16	5.46	49.87	34.68	36.45	24.37	29.23	16.91	27	20.34	51.45	28.36	14.72	3.23	2.67	2.75	2.34
		101.29	93.04	99.93	33.63	67.56	37.85	2.55	5.2	5.26	54.02	38.83	34.54	23.6	32.52	17.45	28.18	19.02	51.81	29.41	14.69	2.47	2.68	2.18	2.45
		101.46	94.1	99.7	33.44	69.01	35.69	2.53	4.21	4.7	50.58	35.38	33.94	24.55	31.85	15.65	24.72	22.67	54.25	29.52	14.09	3.55	2.38	2.35	2.08
		101.96	95.08	101.13	33.21	67.12	37.92	2.55	4.57	4.74	52.9	37.7	37.71	23.59	31.62	15.64	27.78	19.61	51.69	31.99	16.03	3.07	3.17	2.3	2.11
		102.04	94.99	100.39	32.35	67.01	37.38	2.5	5.01	4.8	53.25	37.99	36.9	23.87	32.87	16.11	26.05	19.39	53.28	28.36	14.16	3.5	3.33	2.62	1.6
		102.09	96.29	100.5	35.47	66.52	39.03	2.5	4.78	4.83	51.9	36.63	37.41	24.29	31.43	17.53	28.4	20.85	54.94	31.64	13.15	3.41	2.11	2.32	2.03
		102.24	94.21	100.94	34.27	67.46	36.04	2.48	4.16	5.54	52.43	37.14	35.21	21.63	30.98	17.6	27.77	21.74	51.41	28.83	14.09	3.12	2.99	2.42	2.05
		102.33	96.45	100.96	33.31	66.65	39.15	2.54	5.21	5.15	54.42	39.12	35.93	21.37	31.23	17.8	28.1	20.77	55	32.01	15.09	2.75	2.11	2.65	1.73
		103.27	95.4	101.43	32.12	67.19	37.11	2.57	4.86	4.6	53.28	37.9	37.28	23.91	29.26	17.76	25.63	18.99	51.4	29.53	14.07	3.22	2.82	2.54	1.83
		103.45	97.45	102.45	32.02	67.03	39.01	2.49	4.25	4.61	50.61	35.24	35.26	23.21	33.03	14.16	26.84	20.96	55.48	31.98	14.04	2.36	3.29	3.22	2.32
		103.47	96.28	101.87	34.24	67.85	39.85	2.48	5.23	5.59	51.77	36.38	36.71	22.66	29.24	16.12	28.07	21.41	52.08	30.93	14.05	2.96	3.12	2.62	1.92
		103.47	96.84	102.35	34.45	69.38	36.79	2.54	4.58	5.38	50.96	35.53	37.68	24	33.19	13.76	26.85	19.25	51.48	29.26	15.02	3.14	3.06	3.18	2.15
		103.49	97.31	101.88	33.98	69.17	39.77	2.56	3.97	4.73	51.82	36.39	34.52	23.54	30.66	13.98	28.29	21.28	52.95	29.93	13.38	2.49	2.35	3.12	2.04
		103.55	95.97	102.52	33.87	70.79	39.61	2.55	4.58	5.07	52.4	36.97	37.9	22.11	31.73	16.59	27.89	20.57	51.68	29	15.66	3.28	2.11	2.99	1.48
		103.64	95.86	102.58	31.97	67.67	35.91	2.51	5.31	5.29	51.06	35.62	36.3	24.01	30.48	16.25	27.03	20.32	52.42	31.37	16.41	3.37	2.67	3.12	1.56
		104.02	97.34	103.19	33.98	61.12	42.24	2.26	5.47	5.06	53.84	46.39	40.77	24.92	34.42	14.79	31.21	23.31	65.71	39.24	16.87	2.38	3.27	3.23	1.79
		104.1	97.83	102.42	34.93	63.13	42.03	2.29	5.42	5.45	51.6	44.15	40.87	26.43	32.17	18.14	30.14	25.08	66.1	39.14	16.11	2.93	2.82	2.86	1.96
		104.17	97.79	102.75	34.94	62.89	41.3	2.36	5.48	5.36	52.33	44.88	39.24	23.39	32.48	17.09	32.05	23.95	66.17	39.06	15.66	3.14	3.37	3.03	1.8
		104.43	97.62	102.89	35.54	62.6	42.02	2.27	5.35	5.54	50.58	43.13	39.72	27.45	32.41	17.18	32.56	24.55	63.09	38.65	15.5	2.81	2.83	2.66	1.42
		104.57	98.45	102.96	34.66	61.89	41.12	2.36	5.04	5.31	54.46	47	40.53	25.81	32.44	16.73	30.97	22.65	64.83	38.83	13.79	3.21	3.42	2.86	2.29
		104.68	99.02	103.65	35.52	61.38	39.46	2.28	4.82	5.48	51.17	43.69	39.39	24.41	32.23	18.03	31.51	25.67	63.81	37.53	15.62	2.72	2.91	3.24	1.62
		104.8	99.29	102.99	36.81	65.54	39.68	2.34	5.32	5.51	54.19	46.7	38.9	26.08	32.21	16.66	33.14	25.94	65.99	39.75	16.58	3.48	2.63	2.53	2.04
		105.24	97.51	103.82	36.7	63.44	38.38	2.37	5.76	6.09	53.61	46.11	40.78	24.35	30.94	16.21	33.04	22.62	64.27	40.98	13.99	2.39	3.13	3.21	1.69
		105.38	99.37	104.25	33.62	64.14	41.97	2.38	5.19	5.66	50.95	43.45	41.94	27.31	32.07	19.17	33.17	22.63	66.8	40.31	16.01	2.92	3.11	2.51	1.44
		105.68	99.88	104.05	33.27	62.59	39.61	2.34	4.53	5.46	52.22	44.7	42.72	25.51	31.28	17.39	34.1	23.84	66.34	40.2	17.68	3.24	2.94	2.97	2.12
		105.82	100.6	104.4	33.34	63.7	38.83	2.31	5.13	5.52	54.26	46.72	42.31	24.1	33.12	16.6	34.1	25.61	66.89	40.25	17.89	2.81	2.14	2.8	1.33
		105.96	97.62	104.29	33.82	63.19	41.63	2.35	4.97	4.74	53.18	45.61	39.84	26.73	35.2	15.5	31.91	25.96	64.97	38.89	15.23	3.22	2.18	2.98	1.53
		106.3	98.88	105.36	37.37	62.9	41.47	2.37	5.25	5.04	55.12	47.55	43.13	24.12	34.72	15.08	33.72	26.03	66.14	38.58	15.86	3.09	3.4	2.31	1.59
		106.34	100.1	104.85	33.38	66.25	39.75	2.35	5.62	5.29	54.78	47.2	39.39	25.24	32.8	17.91	30.85	24.04	64.48	39.48	17.01	2.49	3.46	2.91	1.65
		106.51	99.31	105.28	37.21	64.87	42.44	2.38	5.21	4.76	52.95	45.37	39.48	24.14	33.96	17.79	34.38	24.1	66.53	40.49	15.72	3.49	2.46	3.06	2.39
		106.57	100.77	105.44	33.81	64.55	40.45	2.33	5.76	5.97	53.09	45.51	42.52	27.66	33.02	16.86	33.5	26.9	64.43	37.5	15.23	2.56	2.51	2.7	2.08
		106.71	99.97	105.32	35.43	65.44	40.85	2.42	5.59	4.8	52.85	45.25	40.15	24.18	31.98	16.01	33.29	26.7	67.25	39.72	15.29	2.54	2.18	2.93	1.58
		106.74	101.39	104.99	36.7	66.01	42.37	2.38	5.22	4.78	54.69	47.09	40.34	25.64	34.12	17.6	33.88	24.13	66.36	37.48	13.99	2.68	3.04	2.65	2.07
		106.84	100.52	105.39	35.38	64.93	41.3	2.36	5.22	5.95	53.38	45.78	42.55	25.73	33.74	17.17	30.82	24.7	67.89	38.5	16.77	2.43	2.59	2.35	2.1
		107.38	99.71	106.16	35.04	66.4	39.31	2.37	5.06	5.89	52.67	45.02	40.9	24.57	33.1	15.97	30.89	26.68	67.82	38.25	16.68	3.23	3.06	2.3	1.61
		107.45	101.02	106.34	33.92	65.1	41.4	2.4	5.81	5.14	54.48	46.82	39.81	26.67	34.7	17.05	32.22	27.05	66.54	37.66	17.28	3.76	2.73	3.06	1.76
		107.47	100.8	105.95	37.1	65.74	40.78	2.37	4.66	5.83	54.19	46.51	41.14	25.76	33.32	18.07	32.35	25.69	67.89	41.41	15.09	2.91	3.23	3.21	1.81
		107.47	100.98	105.82	33.79	64.4	40.41	2.42	5.4	5.59	53.09	45.41	42.68	24.37	34.71	19.02	32.83	23.67	65.74	38.95	17.56	2.39	3.37	2.51	2.08
		107.49	99.6	105.71	34.47	63.88	40.52	2.37	5.62	6.2	55.34	47.66	42.14	28.24	32.85	16.16	31.28	24.13	65.5	41.76	14.07	3.1	2.65	2.96	2.27
		107.49	99.28	106.48	37.51	63.95	43.2	2.37	5.78	5.38	56.01	48.31	42.6	27.43	31.98	15.68	32.4	23.15	68.38	41.84	14.48	3.59	3.01	2.72	2.03
		107.54	101.44	106.04	34.94	65.81	42.3	2.45	5.11	5.87	52.32	44.62	40.15	27.27	35.94	16.38	31.36	27.27	66.26	37.77	14.07	3.62	2.81	2.51	2.07
		107.55	101.76	105.88	36.22	64.29	41.11	2.41	4.84	5.23	53.11	45.41	40.89	27.04	35.99	15.42	32.12	23.92	67.8	38.56	18.06	3.69	2.32	3.1	1.8
		107.55	100.23	105.77	34.25	65.41	42.05	2.41	5.16	5.92	52.94	45.22	43.53	26.82	33.53	15.46	34.81	25.58	68.7	38.08	15.1	2.95	3.3	2.42	2.39
		107.57	101.59	106.31	34.24	64.35	42.38	2.38	4.83	5.11	53.33	45.61	43.71	25.02	34.27	18.4	33.06	23.9	64.67	37.96	15.65	2.51	2.85	2.65	1.5
		107.57	101.64	105.62	37.08	67.29	42.32	2.37	5.69	5.61	53.07	45.33	40.98	27.96	34.52	19.11	34.49	27.28	65.75	40.52	15.58	2.89	2.43	2.54	2.26
		107.6	101.66	105.94	35.46	66.75	41.1	2.43	4.75	5.54	56.35	48.59	41.91	28.4	33.21	17.9	31.39	25.1	69.01	40.01	16.93	3.15	2.25	2.54	1.8
		107.97	101.43	106.66	35.55	64.17	41.33	2.37	5.45	5.15	56.56	48.8	41.28	26.17	35.12	18.09	34.5	27.06	66.12	41.87	18.08	3.04	2.41	2.78	1.73
		108.08	101.04	106.19	34.81	64.47	42.84	2.43	4.74	5.77	55.15	47.38	40.92	27.61	32.8	19.5	33.64	25.97	66.44	41.21	15.81	2.61	2.37	2.77	1.89
		108.13	101.27	106.78	35.16	67.64	43.73	2.45	5.59	5.89	56.45	48.69	42.12	26.28	33.64	16.14	34.45	26.49	66.04	38.94	16.14	3.46	2.91	3.06	2.05
		108.13	102.06	106.37	36.64	66.24	40.16	2.45	5.78	6.2	53.35	45.58	42.91	27.33	35.03	18.1	32.36	23.51	66.19	41.29	15.56	3.44	2.61	2.58	1.77
		108.14	102.06	106.32	34.67	65.83	42.59	2.44	5.36	5.96	56.45	48.67	41.17	28.21	35.69	15.84	34.22	25.61	68.07	39.77	14.15	2.55	2.71	2.67	1.67
		108.17	100.01	106.13	34.19	66.64	43.3	2.43	5.78	5.62	55.5	47.72	43.04	25.47	32.41	18.1	35.15	23.76	67.91	40.81	17.34	2.84	2.91	2.4	1.53
		108.22	102.34	106.08	35.83	67.92	43.95	2.4	4.98	5.16	53.06	45.28	40.33	25.75	35.45	17.56	32.07	27.14	66.64	39.97	15.16	3.14	2.63	2.52	1.58
		108.39	101.59	106.53	36.99	66.97	43.11	2.41	5.11	5.68	54.29	46.51	41.89	27.39	33.93	19.75	32.15	27.21	66.44	39.59	16	3.15	3.11	2.76	2.23
		108.41	103.04	106.44	37.08	66.7	41.01	2.45	5.02	5.09	53.56	45.76	40.42	27.6	34.73	19.07	34.68	24.63	67.46	38.93	16	2.81	2.92	3.28	1.78
		108.47	102.97	106.42	34.68	64.7	43.39	2.37	4.63	5.88	53.02	45.22	43.62	26.51	33.73	19.14	35.25	23.63	68.2	40.31	15.85	3.39	3.09	2.71	1.44
		108.5	101.39	106.53	35.74	67.31	39.97	2.48	5.9	5.98	55.01	47.21	42.28	27.16	33.97	15.66	34.86	25.09	65.76	38.95	17.69	2.42	2.4	2.68	2.16
		108.52	101.67	107.07	38.42	66.71	42.12	2.4	5.77	5.49	53.7	45.9	43.53	28.04	33.77	17.21	33.73	25.79	66.69	39.4	14.54	2.69	3.37	2.37	1.97
		108.53	103.19	106.31	35.86	68.13	43.97	2.38	4.61	5.83	54.88	47.07	42.63	24.78	35.26	18.16	31.36	25.32	67.02	41.08	17.33	2.89	2.37	3.22	1.52
		108.6	102.13	106.47	37.02	66.75	43.24	2.46	5.27	5.43	54.66	46.85	44.32	26.29	35.05	16.36	34.46	26.62	68.4	40.13	15.54	2.45	3.35	3.15	1.49
		108.64	101.35	107.36	34.4	64.92	41.31	2.38	4.71	5.38	57.02	49.2	40.75	28.69	34.5	19.63	33.51	27.14	66.33	41.1	15.39	3.59	2.99	2.4	1.93
		108.67	103.28	106.66	35.3	68.49	43.29	2.43	4.98	5.03	57.11	49.29	40.66	25.34	35.56	17.7	31.59	25.47	69.63	40.4	17.46	3.8	2.61	2.87	1.56
		108.68	102.02	107.22	38.52	67.1	42.06	2.41	4.85	6.24	57.45	49.59	43.78	26.76	34	18.76	34.74	27.56	70.04	39.25	17.19	3.09	3.12	2.65	1.67
		108.8	102.2	107.17	37.17	68.65	40.26	2.44	5.3	4.94	55.4	47.53	40.9	26.03	35.57	18.86	35.03	25.09	66.45	42.82	14.77	3.1	2.34	2.67	2.09
		109.09	102.66	107.73	35.43	67.93	41.12	2.45	5.79	6.17	55.19	47.3	44	26.92	35.43	17.64	35.21	26.3	67.01	41.24	15.35	3.3	3.25	2.48	1.41
		109.1	103.35	107.9	37.05	66.93	41.9	2.44	4.85	6.13	56.51	48.61	43.31	25.75	36.15	16.21	32.04	24.17	70.09	42.76	18.05	2.94	2.5	2.36	2.19
		109.11	102.15	107.71	36.86	66.68	43.39	2.49	5.66	5.41	56.75	48.84	42.87	25.88	36.54	16.23	33.85	25.82	69.13	39.27	18.22	2.43	2.37	2.79	1.88
		109.43	101.55	107.53	34.81	68.53	41.97	2.49	5.62	5.36	55.11	47.19	42.45	28.44	33.13	16.97	34.51	24.34	67.42	40.17	17.23	3.37	3.2	2.85	1.53
		109.51	103.46	108.25	37.42	66.5	41.29	2.48	5.33	5.75	54.4	46.46	42.67	25.21	34.2	19.97	35.28	27.32	67.17	40.37	16.45	2.95	2.46	2.78	2.03
		109.56	101.33	107.67	37.23	65.83	43.02	2.5	5.69	5.49	54.78	46.83	41.24	28.54	34.22	16.93	33.33	24.08	68.32	42.08	16.05	2.63	2.9	2.78	2.04
		109.67	101.35	107.94	37.96	66.2	44.4	2.43	5.56	6.18	56.25	48.3	44.99	26.29	34.41	17.82	33.6	27.04	66.68	39.1	16.47	3.71	3.34	2.62	2.35
		109.76	103.57	108.04	38.65	65.99	41.17	2.49	5.64	5.77	55.49	47.55	44.47	25.67	36.01	17.4	33.07	26.19	69.74	40	17.49	3.14	3.3	2.58	1.79
		109.78	102.61	107.98	35.51	68.52	41.37	2.45	4.92	5.71	57.67	49.72	43.91	26.37	35.31	16.95	33.71	26.48	67.26	43.07	16.84	3.31	2.74	3.18	1.81
		109.8	102.85	107.96	37.04	66.24	42.13	2.44	5.82	6.34	55.43	47.48	42.6	27.33	34.13	17.26	33.79	24.55	66.62	40	16.53	2.59	2.36	2.71	1.91
		109.81	103.39	108.48	39.07	68.7	43.5	2.46	5.71	5.11	55.3	47.34	42.75	27.44	33.87	17.52	31.87	25.53	69.3	42.47	17.12	3.1	2.49	3.15	1.62
		109.92	104.67	107.91	37.08	69.45	42.6	2.48	5.32	5.48	56.58	48.6	44.77	25.83	35.63	18.05	32.19	25.47	68.37	41.09	16.76	3.03	2.31	2.67	1.58
		110.07	104.33	108.58	39.03	67.77	43.24	2.49	5.18	5.58	57.9	49.91	43.83	28.9	35.71	18.25	33.55	24.99	67.02	40.74	16.61	2.75	3.51	3.28	1.55
		110.36	103.17	108.14	36.84	68.38	42.51	2.54	4.85	5.82	58.33	50.34	41.81	27.58	35.43	16.81	34.29	26.67	67.09	40.06	15.34	3.8	2.62	3.21	1.47
		110.65	103.01	109.04	36.68	66.24	41.49	2.46	5.21	5.95	58.23	50.24	44.62	28.87	36.9	18.03	34.99	24.99	68.86	42.18	15.65	3.76	3.45	3.11	1.64
		110.87	103.79	108.9	36.8	67.69	41.22	2.45	5.43	5.27	56.46	48.46	45.36	27.27	34.58	16.9	32.39	27.24	69.21	41.71	16.72	3.33	3.46	2.98	1.89
		111.19	104.02	109.53	36.94	66.75	42.28	2.54	5.92	5.19	54.57	46.55	42.24	26.95	35.42	18.61	34.19	24.72	71.22	41.47	15.81	2.96	2.83	3.27	1.56
		111.86	104.1	110.08	36.18	69.16	42.16	2.45	5.63	6.02	55.03	47	43.17	25.24	35.02	17.61	36.03	24.84	68.95	43.29	18.64	3.15	2.36	3.31	2.19
		111.94	104.66	109.93	35.33	67.74	41.75	2.46	5.96	6.38	57.13	49.11	42.85	26.19	35.04	18.29	34.35	25.83	70.31	41.73	17.56	3.19	3.23	2.58	1.94
		112.04	103.43	110.74	38.1	67.88	44.94	2.51	5.11	5.79	56.83	48.8	42.96	28.12	36.8	17.09	32.19	26.29	71.33	40.72	18.07	3.51	2.35	3.24	2.14
		112.21	105.81	110.09	37.74	67.65	41.47	2.55	5.1	5.29	55.19	47.12	46.08	28.52	36.52	20.19	34.77	24.83	67.56	41.14	17.44	3.68	3.26	3.04	2.18
		112.3	105.85	110.63	39.17	70.06	43.56	2.54	5.29	6.14	56.03	47.96	42.59	29.13	34.63	16.37	35.23	24.9	68.02	40.83	15.8	3.66	3.46	3.12	1.82
		112.3	105.45	110.01	35.56	67.95	42.56	2.56	5.21	5.88	58.72	50.65	42.38	29.08	33.88	18.38	35.2	26.03	69.3	43.33	15.38	2.98	2.3	3.31	2.43
		112.52	104.26	110.92	39.43	67.69	44.66	2.55	5.22	6.38	58.9	50.81	44.2	26.6	37.18	18.72	34.8	24.61	69.1	42.14	18.9	2.46	2.5	3.34	1.61
		112.68	104.51	111.26	39.49	70.12	43.04	2.53	5.7	6.37	58.17	50.06	45.95	25.7	36.91	20.08	36.52	26.48	71.95	40.83	17.14	3.09	2.56	3.26	2.41
		113.16	104.79	111.1	37.53	70.75	45.41	2.56	5.8	5.93	56.39	48.27	42.92	26.95	34.71	17.73	34.1	27.22	71.69	39.87	16.36	3.4	2.4	2.41	1.76
		113.26	104.59	111.55	38.65	67.02	41.77	2.51	5.36	5.51	58.82	50.7	46.11	27.32	34.15	20.11	33.38	25.82	71.68	43.98	17.13	3.28	2.4	2.6	2.06
		113.5	106.6	111.62	37.77	70.59	44.76	2.53	6.02	5.31	59.31	51.17	42.39	25.8	36.99	19.34	33.51	27.6	71.84	42.56	17.21	2.69	3.26	3.36	1.92
		113.61	105.51	111.79	39.24	70.07	44.86	2.55	5.44	5.17	57.96	49.82	44.84	29.73	37.51	19.53	32.69	24.81	71.18	43.27	18.81	2.71	2.6	2.7	1.89
		113.64	106.6	111.34	37.01	67.62	43.07	2.55	5.93	6.43	57.94	49.8	43.78	28.8	37.08	17.69	34.96	27.36	71.7	42.86	18.31	3.81	2.47	3.36	1.69
		113.84	106.59	111.75	38.38	68.65	45.73	2.54	4.93	6.26	55.64	47.49	44.56	25.61	34.18	18.79	35.1	28.14	70.21	40.16	18.85	3.53	2.85	3.01	2.47
		113.9	105.81	111.83	37.89	67.27	42.34	2.53	5.55	5.87	59.55	51.4	46.09	25.67	33.79	18.77	35.92	27.4	72.33	40.47	18.04	3.86	3.05	3.1	2.42
		114.36	107.67	112.29	37.56	70.44	45.01	2.57	5.78	5.99	58.09	49.94	43.26	28.34	36.09	20.02	32.58	26.55	68.3	40.17	15.66	2.57	3.17	2.81	2.27
		114.71	106.9	112.43	36.45	69.4	42.23	2.58	5.36	5.75	57.01	48.86	44.34	29.09	34.88	17.03	34.47	25.17	68.42	43.7	15.14	2.69	2.61	2.52	2.24
		114.72	108.36	113.17	39.19	70.69	44.62	2.5	6.05	5.48	59.56	51.4	44.86	27.26	37.39	16.95	34.2	26.59	69.53	41.78	16.05	3.79	3.02	2.83	1.95
		114.94	107.58	113.18	36.21	69.3	45.43	2.55	5.37	5.61	58.58	50.42	43.69	28.18	37.44	20	32.78	25.36	71.88	41.62	19.08	3.46	2.96	2.65	2.28
		114.98	106.47	113.68	39.59	67.67	42.93	2.54	5.14	5.31	59.62	51.45	42.58	29.69	34.78	19.81	34.54	25.12	68.96	43.48	19.02	3.29	2.96	2.7	1.67
		115.22	108.76	113.82	37.17	70.2	42.32	2.53	5.24	5.42	58.09	49.91	46.2	28.72	36.84	17.62	35.02	25.53	69.59	41.48	15.78	3.03	3.01	2.59	1.51
		115.52	108.49	113.27	39.39	67.45	42.8	2.51	5.16	6.23	58.95	50.77	43.13	25.92	37.58	20.44	36.21	27.29	71.3	42.33	14.94	3.19	3.15	2.85	1.66
		115.54	108.78	113.87	37.93	67.84	42.86	2.52	5.77	5.25	56.84	48.64	44.2	28.96	37.94	16.44	34.47	27.82	69.12	41.72	17.53	3	3.38	2.93	2.13
		115.58	109.25	114.05	37.89	70.63	43.67	2.52	5.62	6.12	56.55	48.34	42.81	28.1	37.89	18.46	36.79	26.56	70.27	42.31	17.74	3.74	3.38	2.69	1.83
		115.64	106.95	114.11	38.73	68.55	45.29	2.61	6.22	5.32	56.6	48.38	42.72	26.7	35.23	18.55	34.13	25.66	70.72	40.5	17.03	3.62	2.67	2.62	2.39
		115.72	107.97	114.18	40.02	69.24	46.23	2.58	4.98	6.3	59.15	50.91	44.06	27.55	34.29	17.38	35.01	27.86	72.21	40.77	17.8	3.27	2.97	2.87	1.55
		115.73	108.91	114.39	40.41	70.68	43.44	2.52	5.65	6.38	56.79	48.55	45.44	26.33	38.1	18.31	35.02	25.21	71.23	44.23	16.95	3.28	2.31	3.29	2.15
		116.08	109.49	114.74	38.76	68.83	45.44	2.5	5.14	6.52	57.87	49.63	45.27	26.11	37.47	17.43	35.85	28.65	72.06	42.15	15.23	2.76	2.98	3.15	1.42
		116.25	107.82	114.66	39.72	70.48	43.42	2.59	5.47	5.5	56.9	48.63	43.45	29.47	34.54	16.64	36.02	28.69	71.08	42.48	19.26	2.68	2.71	2.51	2.48
		116.36	110.03	114.48	36.72	70.39	45.64	2.54	6.13	6.45	56.91	48.65	46.32	29.32	35.38	17.35	36.9	26.38	70.66	41.87	17.04	3.79	2.91	3.15	1.77
		116.52	110.05	114.63	38.08	70.71	46.52	2.58	5.18	6.17	59.27	50.99	45.51	26.22	34.93	18.84	36.41	26.96	71.07	43.71	17.22	3.03	3.64	2.64	2.04
		116.52	108.3	114.37	37.41	70.47	45.07	2.56	6.03	5.24	58.66	50.38	47.17	26.73	37.89	20.78	33.86	25.95	71.8	44.48	15.25	3	3	3.05	1.69
		116.66	108.96	114.4	38.06	70.43	45.45	2.54	6.28	5.82	59.68	51.4	46.45	29.76	36.79	19.91	36.8	26.91	71.77	42.57	16.03	2.75	2.69	3.06	1.9
		116.72	109.83	114.51	38.02	70.33	43.64	2.58	5.16	5.6	59.23	50.94	45.97	29.2	34.54	17.79	33.8	26.72	70.75	44.56	15.34	3.4	2.94	3.05	2.15
		116.75	108.36	114.95	40.33	70.47	42.75	2.6	4.92	6.25	59.99	51.69	45.64	29.99	35.33	20.65	34.18	27.87	71.6	43.85	17.21	3.83	3.16	3.39	2.38
		116.84	108.11	114.65	39.58	69.78	46.56	2.61	6.08	6.08	57.19	48.87	43.86	29.34	36.61	18.35	36.64	27.31	70.83	42.42	15.72	3.59	3.56	2.81	2.19
		116.84	110.47	115.02	40.81	72.19	43.44	2.57	4.91	6.04	59.12	50.8	46.07	29.06	36.17	18.21	36.41	28.47	70.86	43.44	18.64	3.18	2.98	3.03	2.49
		116.95	109.05	115.02	39.92	71.45	46.32	2.65	5.41	5.4	57.56	49.2	47.42	26.33	35.18	17.38	35.75	25.96	71.45	42.22	15.34	3.06	2.92	3.09	2.37
		116.96	108.54	114.75	37.7	71.82	44.71	2.56	6.29	5.84	58.73	50.38	44.29	26.33	37.27	19.1	37.3	25.76	71.45	45.03	17.48	3.85	2.73	2.45	2.07
		117.03	110.49	115.19	40.8	71.74	44.76	2.58	5.75	6.23	60.15	51.79	44.63	30.48	35.71	20.77	35.05	26.45	73.1	43.12	15.86	3.75	2.55	2.53	2.09
		117.16	108.68	115.54	38.09	72.92	46.77	2.61	5.13	5.58	59.38	51.02	47.56	29.08	38.23	17.86	36.26	27.35	73.27	42.06	15.42	3	2.79	3.04	1.98
		117.3	108.82	115.31	38.46	71.84	45.69	2.6	6.24	6.33	57.35	48.98	43.72	29.58	35.23	20.45	34.23	27.31	72.25	43.76	17.69	2.99	3.03	2.88	2.14
		117.65	109.44	115.66	40.57	69.28	43.85	2.55	5.99	5.79	59.06	50.68	43.6	30.15	36.37	19.83	36.1	26	70.99	44.36	18.52	3	2.33	2.77	2.5
		117.74	108.95	115.86	39.72	72.96	47.18	2.56	5.07	6.08	61.35	52.96	45.17	28.45	35.84	16.93	37.69	28.25	70.48	42.28	18.77	2.85	3.25	2.95	1.85
		117.81	110.89	115.57	38.43	71.06	44.51	2.65	5.4	5.85	58.69	50.29	44.48	28.19	37.11	20.83	33.68	25.62	72.78	43.7	17.64	3.58	2.83	2.94	1.75
		117.83	111.51	116.38	40.43	70.66	43.48	2.6	6.19	6.56	59.39	50.97	46.84	29.08	35.57	21.05	36.31	28.83	74.29	41.56	15.79	3.37	3.17	3.16	1.87
		117.97	109.24	116.71	37.46	71.16	46.3	2.59	4.99	5.7	61.42	53	44.24	27.7	37.83	18.05	35.63	25.37	71.99	45.62	19.37	3.78	3.32	3.33	1.66
		118.08	109.81	116.18	38.75	73.31	44.66	2.57	5.2	6.43	59.86	51.44	47.61	28.43	39.04	17.62	34.98	27.76	71.51	42.12	17.04	3.45	2.56	3.38	2.37
		118.19	111.86	116.01	39.15	73.03	44.55	2.66	6.17	5.93	58.27	49.84	47.08	30.55	35.41	21	37.5	25.41	71.75	45.04	19.11	3.05	2.44	3.41	1.8
		118.29	112.07	116.99	40.81	72.37	45.6	2.58	6.19	6.54	57.89	49.46	45.46	30.07	36.85	19.97	35.8	27.11	71.6	44.58	19.26	2.91	3.68	2.83	2.24
		118.34	109.88	116.87	37.94	70.97	46.85	2.63	5.96	6	58.41	49.97	47.47	28.35	36.99	20.41	36.27	29.31	74.91	41.85	15.79	3.23	3.6	2.78	2.4
		118.4	109.64	117.03	40.25	69.75	46.18	2.62	5.2	5.52	60.27	51.81	45.93	29.87	38.42	17.29	36.19	28.02	73.76	43.14	16.87	3.03	3.11	2.61	1.83
		118.45	111.44	116.55	39.94	70.42	44.19	2.61	6.41	5.49	58.8	50.34	46.49	29.54	38.39	17.59	36.38	29.41	71.09	43.49	16.17	3.63	2.48	2.67	1.63
		118.47	111.06	115.2	37.59	70.27	46.97	2.64	5.86	6.74	60.36	51.88	48.07	28.53	39.27	17.27	34.42	27.38	73.43	41.74	18.6	3.06	3.62	2.67	2.5
		118.5	110.69	115.45	39.37	72.85	47.49	2.59	5.63	5.83	62.03	53.55	45.54	26.77	35.61	19.92	37.08	27.17	74.16	42.44	16.09	3.65	2.73	3.5	1.53
		118.56	110.58	116.33	38.48	72.06	45.04	2.68	6.29	5.85	60.45	51.95	45.88	27.2	38.16	20.45	37.77	27.66	75.26	44.77	19.27	2.77	3.14	3.44	1.68
		118.6	111.59	116.82	38.83	72.33	47.58	2.6	5.56	6.01	60.63	52.13	47.15	29.64	39.2	19.94	35.75	28.5	72.61	41.88	18.88	4.01	2.82	3.03	2.52
		118.9	112	116.34	39.67	72.89	47.92	2.62	6.43	5.83	60.47	51.97	45.4	28.15	35.48	20.92	34.71	26.06	74.68	44.12	17.39	2.81	3.59	2.75	1.9
		118.93	111.52	117	39.56	71.21	44	2.67	5.61	5.86	60.05	51.54	45.09	28.79	39.38	17.67	37.66	26.48	72.14	42.68	17.68	3.5	3.14	3.5	1.72
		118.97	111.8	116.15	41.35	70.57	44.85	2.61	5.45	6	60.23	51.71	45.81	27.29	38.65	20.53	34.35	29.83	72.32	45.53	18.3	2.77	3.51	3.39	2.04
		119.09	111.42	116.46	41.28	73.55	44.72	2.67	5.7	5.69	59.87	51.34	47.98	29.68	38.74	17.92	34.6	27.88	72.9	44.44	19.23	3.73	2.84	3.1	1.98
		119.13	111.42	116.38	38.2	73.87	47.15	2.61	5.85	6.34	61.48	52.96	48.64	28.52	35.55	17.59	35.02	29.03	73.09	43.44	18.18	2.74	2.51	2.6	2.26
		119.14	112.17	116.32	37.89	71.76	44.49	2.69	5.77	6.74	60.5	51.98	44.61	30.77	35.52	19.33	37.17	28.24	74.5	42.12	18.64	2.96	2.62	3.12	1.89
		119.17	110.98	115.9	41.45	74.25	47.85	2.68	5.12	6.21	58.52	50	48.66	28.88	35.43	17.88	34.86	25.94	71.86	44.24	16.96	3.93	3.46	3.49	2.05
		119.38	112.48	116.45	39.7	71.01	46.93	2.69	5.98	6.06	58.28	49.74	45.62	28.08	35.89	21.33	37.19	26.57	75.57	45.14	15.59	3.11	3.46	2.66	2.45
		119.43	112.57	117.03	41.25	71.28	46.21	2.65	5.41	5.51	59.06	50.51	48.77	29.82	39.39	20.37	36.15	26.23	75.68	42.47	16.45	3.34	3.71	2.6	1.98
		119.5	111.65	117.61	40.24	72.81	44.14	2.6	6.45	5.5	62.08	53.52	45.85	28.9	38.39	18.53	36.98	27.4	75.73	45.22	16.08	3.51	3.16	2.52	1.87
		119.61	112.13	117.56	37.8	74.34	46.51	2.69	6.33	5.58	62.02	53.46	47.08	27.3	38.87	20.25	34.89	26.12	72.15	44.53	16.84	3.8	3.73	2.89	1.9
		119.64	112.38	117.35	39.49	74.55	44.07	2.64	5.2	5.83	59.09	50.51	45.37	27.39	38.53	17.38	38.35	26.31	76.16	45	19.53	3.76	3.72	2.6	1.55
		119.74	113.01	117.42	39.83	74.52	45.67	2.63	6.3	6.57	58.99	50.4	44.95	28.97	39.32	17.68	35.41	26.51	75.52	42.45	16.18	3.74	2.52	3.23	1.84
		119.81	111.82	116.63	41.88	71.46	46.83	2.61	5.99	5.68	62.76	54.16	47.42	27.91	35.93	18.71	34.45	26.04	73.97	44.19	17.31	2.78	2.41	3.29	2.43
		119.83	112.08	117.97	40.44	72.26	45.38	2.62	6.43	6.78	59.64	51.03	47.43	27.68	37.87	17.34	36.32	29.51	73.64	46.58	16.37	2.73	2.65	3.26	2.11
		119.88	112.63	116.59	42.19	74.86	47.83	2.69	6.15	5.5	62.88	54.24	46.45	30.5	35.93	18.4	38.79	27.61	73.08	43.83	19.77	3.29	3.16	2.58	2.16
		120.01	113.75	117.96	38.52	72.51	45.59	2.71	5.48	5.55	60.42	51.78	47.14	28.73	39.86	21.11	37.9	28.07	75.86	43.72	19.58	3.13	3.6	3.35	2.47
		120.11	112.35	117.01	41.1	75.28	48.62	2.65	6.21	5.54	60.58	51.93	47.73	28.97	39.87	20.8	38.7	29.76	74.03	45.58	16.78	2.68	2.77	2.9	2.23
		120.34	113.23	118.32	41.14	74.15	44.52	2.73	5.86	6.37	61.99	53.33	46.84	28.45	37.21	20.15	37.37	29.19	73.4	43.49	17.94	2.97	2.53	2.66	2.24
		120.35	112.14	117.16	41.6	71.75	44.84	2.63	6.38	5.57	59.42	50.76	48.85	28.13	40.04	19.29	34.86	30.27	74.41	45.01	19.14	3.19	3.1	3.44	2.23
		120.37	112.49	117.95	38.81	75.03	46.09	2.67	6.36	5.91	60.63	51.96	48.74	29.67	39.02	18.62	37.6	27.54	75.55	46.16	16.92	2.68	3.44	3.18	2.53
		120.38	112.58	117.45	39.85	74.99	46.98	2.66	6.31	5.78	62.93	54.2	47.69	30.18	36.85	19.52	38.89	26.7	77.33	45.05	15.96	3.27	3.28	3.04	1.73
		120.39	113.01	117.74	39.71	72.19	48.86	2.67	5.22	6.48	63.39	54.66	48.89	30.52	38.76	18.59	35.28	30.04	76.59	43.49	17.71	4	3.29	3.59	1.57
		120.41	112.43	118.69	42.57	74.48	45.79	2.75	6.2	6.46	59.88	51.15	48.72	30.23	37.59	20.14	35.05	30.36	76.74	44.2	16.35	3.79	3.64	2.87	2.59
		120.56	113.54	117.34	40.11	73.53	48.45	2.71	5.34	6.32	60.83	52.09	47.06	31.09	40.02	18.32	37.85	29.54	77.1	46.06	19.54	3.22	2.41	2.8	1.7
		120.84	114.01	118.5	39.48	72.17	45.14	2.73	6.27	6.28	60.48	51.74	48.64	31.1	37.95	20.93	36.65	26.56	75.13	44.63	17.33	2.95	3.29	3.41	1.82
		121.02	114.54	119.05	39.83	72.16	46.59	2.67	5.49	5.74	63.1	54.35	48.52	28.89	39.38	20.46	37.15	27.36	76.68	44.05	16.68	3.4	3.51	2.7	2
		121.25	112.97	119.14	42.71	75.6	45.22	2.71	6.39	6.48	60.42	51.66	47.57	30.92	38.48	21.61	35.42	28.12	77.62	45.29	16.41	2.79	2.41	3.54	2.33
		121.31	113.32	119.38	39.2	75.86	45.74	2.75	6.2	6.12	60.44	51.68	48.92	30.67	39.99	18.41	35.71	29.22	74.23	43.93	19	3.09	3.06	3.06	2.24
		121.42	114.9	118.74	42.24	75	45.14	2.66	6.32	5.54	63.74	54.97	47.49	29.72	39.32	21.89	36.72	27.33	74.52	45.71	18.77	3.7	3.28	2.6	2.01
		121.54	115.16	118.88	41.94	76.5	45.29	2.7	5.68	5.65	63.16	54.39	48.87	31.09	38.94	18.06	37.83	29.67	77.27	46.51	19.51	3.66	2.78	3.45	2.61
		121.6	114.58	118.98	38.74	73.68	45.53	2.73	6.03	6.58	62.36	53.58	48.36	31.7	36.99	21.92	36.58	29.69	76.97	45.51	16.93	3.09	3.31	3.59	1.98
		121.68	114.72	118.43	40.81	73.15	46.58	2.74	5.78	5.93	60	51.21	49.33	30.41	38.36	21.25	38.9	26.67	74.5	46.73	16.26	3.24	2.68	3.44	1.56
		121.88	113.73	118.6	42.61	74.03	47.54	2.72	5.98	5.93	63.74	54.93	47.26	31.1	37.14	18.88	36.14	28.26	74.07	44.56	20.34	3.32	3.24	2.97	2.6
		121.9	115.4	119.62	43.01	72.58	45.74	2.78	6.42	5.69	63.33	54.52	49.98	31.35	37.91	18.45	38.97	28.54	76.03	47.09	19.65	3.56	3.22	2.79	1.95
		122	114.12	119.74	39.11	74.51	47.78	2.73	6.64	6.86	62.77	53.95	48.45	28.43	39.42	21.32	36.98	29.79	78.07	43.53	18.93	3.26	2.98	2.88	1.91
		122.12	115.47	119.91	39.8	74.74	48.5	2.77	6.38	6.27	64.28	55.45	50.01	32.06	38.47	20.54	37.4	26.69	74.19	45.61	19.51	2.74	3.51	3.19	1.62
		122.17	112.34	120.1	40.49	74.64	47.5	2.7	6.49	5.78	62.51	53.65	46.72	30.55	38.73	21.34	39.69	30.37	74.75	45.54	18.24	3.93	2.47	3.37	1.66
		122.18	112.65	119.34	41.48	74.37	46.87	2.75	6.36	6.04	61.86	53	47.48	28.4	40.08	18.24	38.98	29.35	76.25	46.12	19.3	2.67	3.75	3.11	1.7
		122.21	112.81	120.27	43.07	76.57	48.08	2.75	5.72	5.87	63.7	54.83	46.72	29.07	40.98	18.31	35.67	29.49	77.46	44.42	16.72	3.05	2.55	3.56	1.7
		122.34	114.5	120.6	39.39	77.31	47.67	2.8	5.68	6.88	61.93	53.04	49.7	29.35	37.82	19.19	36.58	31.04	74.61	47.05	17.03	4.05	2.66	2.62	1.84
		122.57	115.07	119.61	42.1	74.47	48.62	2.72	6.29	6.05	61.17	52.27	47.67	31.66	39.76	18.04	37.05	28.48	74.71	44.87	16.29	3.09	3.7	3.13	1.9
		122.73	112.51	121	42.05	73.38	46.24	2.77	6.12	6.06	64.54	55.64	47.99	30.32	38.14	21.33	35.64	30.26	76.51	44.32	19.17	2.94	3.33	2.52	1.97
		122.76	115.71	120.52	41.37	74.08	46.83	2.77	6.55	6.71	64.35	55.45	46.41	28.61	37.37	18.87	39.41	28.3	76.56	47.42	17.84	4.09	2.94	2.65	2.14
		122.87	113.56	120.96	42.75	75.57	47.63	2.76	5.86	6.23	64.29	55.39	46.5	29.82	38.97	21.14	38.14	30.21	75.65	47.25	18.39	3.57	2.5	2.61	1.7
		123.14	114.77	120.87	39.41	76.5	49.73	2.71	6.39	6.99	64.31	55.38	46.55	29.51	38.17	18.09	37.81	27.35	78.4	47.97	17.04	3.55	2.52	2.57	1.86
		123.16	112.24	120.06	42.78	77.21	49.59	2.82	6.71	6.73	61.9	52.96	49.45	31.19	40.38	19.89	39.77	29.07	76.06	46.71	19.99	3.93	2.99	3.09	2.36
		123.17	115.77	120.58	41.49	75.09	47.91	2.74	6.3	6.21	64.16	55.22	50.13	30.14	40.21	19.42	39.25	30.22	75.7	46.51	18.76	4.07	2.73	2.71	2.51
		123.48	113.6	121.73	43.23	74.42	49.49	2.74	5.77	5.72	61.31	52.36	49.78	28.81	40.86	20.72	37.35	29.24	75.41	45.75	17.69	3.06	3.41	2.54	2.24
		123.72	115.99	120.74	39.93	77.97	50.01	2.76	6.2	6.98	62.82	53.85	50.34	28.8	40.45	20.17	37.59	27.81	75.67	47.65	18.87	4.06	2.98	2.9	1.99
		123.82	114.7	121.86	39.74	75.11	49.68	2.74	6.72	5.73	64.18	55.21	49.91	28.81	37.21	22.35	36.8	29.65	77.71	44.3	17.85	3.62	3.57	3.13	2.29
		123.95	114.16	120.9	40.84	75.64	47.5	2.84	6.05	6.88	64.74	55.76	48.81	28.74	41.39	21.89	38.49	30.96	76.49	48.43	18.42	3.9	2.43	2.85	2.08
		124	113.6	121.17	39.99	76.95	47.33	2.79	6.67	6.43	65.27	56.27	51.05	30.77	41.13	21.49	37.18	30.16	77.88	46.55	17.69	3.36	2.58	3.49	1.92
		124.04	116.84	121.91	40.87	75.19	48.88	2.75	6.67	5.76	62.58	53.53	47.23	29.21	38.12	22.41	39.06	29.06	78.75	44.71	20.1	2.88	2.45	3.25	1.63
		124.04	116.75	122.26	43.96	78.66	46.89	2.82	5.56	5.75	65.47	56.42	50.48	32.41	41.08	19.32	38.1	28.17	79.7	47.01	18.95	2.93	3.01	2.83	1.65
		124.28	113.86	122.43	44.02	75.9	46.65	2.77	6.35	7.07	64.5	55.45	47.69	31.4	39.07	22.24	39.5	27.45	79.21	48.82	17.18	3.3	3.76	3.3	1.97
		124.44	116.13	121.41	40.43	76.05	47.99	2.87	6.16	5.95	62.32	53.21	50.88	30.11	38.04	20.08	38.63	29.04	79.99	45.28	20.85	3.36	3.81	2.85	2.15
		124.51	114.18	122.23	43.45	75.14	48.78	2.82	6.43	6.7	62.62	53.51	50.97	30.22	40.88	20.36	39.07	27.66	77.96	47.06	16.76	3.35	2.68	3.54	2.21
		124.62	113.92	121.37	43.12	78.48	46.88	2.87	5.87	7.15	62.9	53.79	51.18	28.83	41.48	21.82	39.19	31.58	77.66	48.85	20.16	3.66	3.14	2.98	2.61
		124.82	117.02	121.82	43.2	78.51	50.54	2.82	6.35	6.68	64.86	55.74	48.76	29.56	41.08	21.47	39.81	31.12	76.6	47.91	21	3.71	3.04	3.33	1.89
		125.07	117.91	123.25	42.27	78.17	48.27	2.82	6.38	5.78	64.39	55.25	49.83	31.78	38.58	21.03	38.46	27.63	78.43	47.29	18.6	3.63	3.31	3.21	2.07
		125.54	118.44	123.65	40.84	76.18	49.45	2.82	6.6	6.94	64.01	54.86	48.48	30.59	39.5	19.69	38.93	28.75	77.18	48.78	16.92	3.05	3.7	3.12	1.84
		126.46	117.13	124.24	40.74	78.86	49.58	2.89	5.54	6.75	66.54	57.38	48.47	29.11	41.89	21.07	39.67	30.82	77.21	45.15	19.28	3.8	2.52	3.52	2.3
		126.63	116.41	123.71	42.29	76.95	49.15	2.87	6.69	6.34	63.2	54.03	50.19	31.47	39.87	20.25	38.59	27.9	78.63	47.49	19.2	3.95	3.47	2.92	2.45
		127.08	117.56	124.4	40.74	78.28	49.01	2.88	5.58	6.89	65.56	56.39	51.48	31.36	42.11	20.48	39.59	29.7	80.47	45.35	17.83	3.1	3.19	2.96	2.15
		127.16	117.47	125.44	44.59	79.47	48.47	2.84	5.92	7.16	66.01	56.83	49.85	33.2	38.49	19.45	38.47	29.32	79.21	47.71	17.61	3.63	3.56	2.67	2.48
		131.6	122.47	129.83	44.97	81.28	51.18	2.9	5.91	6.2	67.42	57.92	52.32	31.14	42.06	19.57	38.41	32.32	81.66	47.38	18.24	4.07	3.73	3.66	1.74
		143.6	133.2	141.05	50.04	89.86	54.27	3.21	6.3	7.24	74.73	64.27	55.39	36.67	46.15	22.04	44.25	34.18	91.03	53.24	19.58	3.92	3.9	4.05	2.6
		135.61	128.28	133.7	42.64	80.91	52.06	2.93	6.97	6.91	69.34	59.73	52.93	33.21	43.64	19.75	41.43	29.1	82.03	50.94	18.12	3.6	3.24	3.2	2.09
		140.66	130.9	138.59	46.44	86.63	55.46	3.18	7.46	6.65	73.31	63.13	57.36	35.81	45.74	23.3	42.71	34.74	88.07	50.93	22.21	4.27	2.91	3.47	2.84
Scylla paramamosain	Male	95	89.79	93.58	33.12	64.05	36.34	2.36	4.39	4.46	46.56	25.67	40.21	23.48	30.12	14.36	33.15	32.68	75.8	37.45	19.79	2.61	2.19	1.75	0.07
		95.01	88.29	92.84	32.37	64.68	35.59	2.19	4.35	4.37	46.95	25.18	40.79	22.06	32.52	15.49	32.59	34.39	68.87	39.76	18.47	1.98	0.68	1.46	0.09
		95.29	88.26	93.06	32.08	64.14	37.34	2.25	4.43	4.3	48.18	24.67	37.55	22.09	30.28	15.17	33	33.03	68.65	37.53	20.53	2.19	2.01	1.73	0.48
		95.34	88.45	93.65	34.13	62.88	35.9	2.15	4.68	4.56	48.34	23.3	41.7	24.67	31.34	15.63	32.61	31.43	71.21	39.79	19.4	2.11	0.65	1.67	0.33
		95.35	90.39	93.81	32.72	64.63	35.65	2.37	4.23	4.72	49.25	23.32	39.88	22.13	30.96	15.46	34.61	34.31	70.02	39.51	19.73	4.04	2.62	1.71	0.32
		95.36	89.62	94.42	34.36	63.88	37.91	2.13	4.2	4.7	50.36	24.05	40.02	22.41	30.25	14.29	31.71	34.29	68.98	37.12	19.19	3.84	2.25	1.68	0.06
		95.57	89.79	93.3	31.2	62.18	34.89	2.16	4.16	4.73	46.82	25.93	39.98	23.25	32.67	15.21	32.94	31.93	71.1	37.94	20.58	3.97	0.75	1.51	0.12
		95.59	90.53	94.65	32.72	65.7	36.22	2.13	4.59	4.23	46.47	23.94	38.94	24.45	32.12	14.52	32.46	32.89	74.94	38	20.26	3.43	1.67	1.38	0.27
		95.62	90.07	94.77	35.01	60.85	38.37	2.2	4.29	4.64	47.38	25.62	42.23	23.38	32.48	14.83	32.82	32.94	72.93	39.18	19.21	2.2	2.26	1.64	0.37
		95.62	89.28	94.11	31.85	63.24	38.01	2.35	4.39	4.41	46.6	24.2	37.87	24.32	31.77	14.41	33.56	31.45	69.56	40.83	19.22	3.19	1.9	1.57	0.09
		95.75	90.77	94.69	31.49	64.15	34.58	2.12	4.47	4.38	46.2	24.87	40.41	21.89	30.45	14.72	33	35.37	73.81	38.83	19.24	3.12	0.99	1.64	0.47
		95.86	88.66	94.52	32.61	60.89	37.35	2.19	4.66	4.65	50.09	23.16	40.64	22.55	30.6	14.95	31.14	33.75	69.23	37.49	19.46	2.98	2.38	1.41	0.02
		95.89	90.35	94.43	32.66	61.72	36.95	2.35	4.29	4.57	49.43	23.46	40.33	22.32	29.78	14.63	33.47	31.71	76.54	40	18.43	2.81	1.37	1.54	0.44
		95.92	89.52	95.08	32.05	62.8	35.2	2.32	4.19	4.62	49.35	25.53	38.65	24.57	31.66	15.59	31.69	32.5	73.95	41.24	19.16	2.37	2.06	1.63	0.27
		95.94	89.87	94.08	31.2	67.16	37.36	2.34	4.16	4.71	47.9	23.49	41.64	22.96	31.38	14.49	34.44	33.69	69.32	39.04	19.94	2.29	2.5	1.78	0.11
		95.98	88.94	95.08	33.34	66.5	37.97	2.28	4.44	4.43	45.81	24.03	39.68	23.84	32.15	13.94	34.59	31.39	71.7	37.88	20.17	3.94	2.22	1.4	0.21
		96	91.09	94.33	34.11	66.8	35.08	2.19	4.64	4.3	49.75	25.27	38.15	22.96	32.15	15.2	34.67	31.76	70.98	41.64	19.59	2.77	2.12	1.49	0.45
		96.11	89.78	94.09	33.83	61.51	36.93	2.35	4.21	4.27	49.4	23.52	39.81	23.82	31.82	14.34	32.52	31.54	76.63	37.04	19.34	3.15	2.19	1.67	0.05
		96.4	91.25	94.99	31.3	61.43	34.9	2.15	4.27	4.73	48.85	23.78	40.34	24.45	31.04	14.23	32.93	32.26	69.89	38.35	19.85	2.86	0.73	1.56	0
		96.42	89.58	94.97	31.81	66.72	34.85	2.21	4.64	4.46	50.65	23.9	38.43	22.18	29.48	15.63	31.68	32.45	70.51	40.55	19.34	2.05	1.51	1.73	0.38
		96.42	89.95	94.48	34.38	65.97	37.09	2.2	4.4	4.54	48.39	23.22	41.12	23.69	31.73	14.9	33.12	35.11	74.07	37.24	18.93	2.86	1.69	1.79	0.16
		96.47	89.46	95.02	31.38	62.26	36.6	2.18	4.62	4.44	49.14	25.64	41.96	24.2	31.34	15.63	34.19	33.12	68.75	38.88	19.39	2.48	1.38	1.82	0.39
		96.49	90.29	94.32	33.38	65.94	36.47	2.22	4.52	4.39	50.35	23.91	42	24.35	31.11	15.52	33.55	32.42	73.87	37.87	19.42	3.82	2.78	1.39	0.23
		96.5	90.57	95.17	31.74	65.55	36.98	2.29	4.47	4.26	48.64	25.57	38.47	22.19	32.09	14.77	34.41	33.48	74.08	37.79	20.56	3.24	2.11	1.51	0.42
		96.56	90.64	95.1	34.16	66.11	35.81	2.35	4.59	4.38	48.31	23.43	38.34	22.31	30.63	14.79	34.71	34.74	73.34	40.16	19.45	2.53	2.79	1.64	0.46
		96.6	91.22	95.64	34.51	59.7	38.22	2.38	4.34	4.46	46.55	23.44	38.04	23.65	31.87	14.79	32.73	33.56	72.02	41.59	19.66	2.35	1.55	1.57	0.12
		96.62	91.36	95.26	32.55	63.6	35.73	2.25	4.21	4.39	49.58	23.55	41.2	21.97	31.49	15.5	32.8	33.03	72.57	38.97	19.05	2.91	1.32	1.6	0.31
		96.77	90.89	94.76	32.31	63.04	37.9	2.31	4.24	4.51	46.69	23.88	37.98	22.25	31.16	15.4	33.88	34.85	75.12	40.02	19.74	3.64	1.11	1.6	0.16
		96.91	91.63	94.76	34.65	63.21	38.18	2.36	4.31	4.73	47.08	23.35	41.72	22.81	32.7	14.22	32.14	32.84	71.24	38.85	20.28	3.01	1.7	1.88	0.35
		97.04	90.38	94.88	32.81	63.22	37.2	2.15	4.67	4.31	47.27	23.7	40.58	22.95	31.5	13.9	31.13	34.97	69.76	39.66	20.13	2.59	1.45	1.78	0.16
		97.07	91.64	95.86	31.11	61.08	34.94	2.26	4.36	4.61	48.37	23.58	37.99	22.49	30.81	14.33	31.71	31.69	68.83	38.09	18.62	2.28	1.63	1.72	0.14
		97.16	90.76	96.24	32.85	65.52	35.56	2.17	4.24	4.24	51.01	23.05	38.53	24.67	30.62	14.17	34.06	34	75.03	37.42	19.02	3.57	2.37	1.65	0.49
		97.21	91.04	94.96	33.43	62.73	36.5	2.15	4.68	4.4	47.58	25.85	40.09	23.35	31.77	14.29	32.42	32.29	73.83	39.8	20.29	3.58	2.53	1.48	0.41
		97.5	90.83	96.31	34.9	63.73	38.41	2.38	4.38	4.43	49.73	24.4	40.37	22.7	30.23	14.89	33.31	32.68	76.55	38.62	18.81	2.04	2.73	1.7	0.37
		97.67	91.69	95.72	32.69	66.07	36.15	2.15	4.38	4.45	48.68	24.74	42.31	23.03	30.97	13.88	31.69	34	75.33	39.67	18.75	3.28	2.24	1.57	0.21
		97.84	91.97	96.01	33.92	64.59	34.81	2.33	4.56	4.53	47.47	25.67	37.97	23.2	30.84	14.99	35.12	33.62	71.88	41.01	20.04	3.25	2.18	1.62	0.21
		97.89	90.86	96.54	31.48	62.92	34.97	2.27	4.44	4.5	50.5	25.4	39.59	22.25	32.84	15.63	33.47	32.69	74.97	40.63	18.65	3.29	1.87	1.41	0.29
		97.96	91.32	96.8	32.64	66.24	38.38	2.21	4.21	4.3	51.06	25.7	41.22	24.48	30.08	14.49	34.07	34.28	71.3	41.56	18.4	3.51	1.15	1.52	0.14
		98.12	89.72	95.99	31.12	63.04	36.5	2.23	4.7	4.46	51.05	25.22	39.42	23.45	31.8	15.57	34.59	32.17	71.74	36.97	18.86	3.31	2.25	1.82	0.04
		98.16	90.92	96.95	33.86	60.05	37.23	2.14	4.25	4.23	49.41	23.13	40.6	23.93	31.2	14.54	34.37	33.04	71.93	39.82	19.74	2.58	1.29	1.81	0.3
		98.23	92.08	96.31	32	59.8	38.12	2.28	4.62	4.27	46.95	24.37	37.92	23.69	32.5	14.41	32.57	35.22	71.63	38.88	20.34	2.62	2.56	1.67	0.14
		98.42	91.74	96.58	31.88	60.25	37.77	2.27	4.6	4.67	46.37	23.12	37.78	24.28	29.5	15.03	31.5	33.13	75.79	37.44	20	2.52	0.71	1.51	0.27
		98.43	90.49	97.59	32.16	66.82	36.68	2.38	4.67	4.49	48.72	23.62	39.09	22.53	32.59	15.07	33.19	31.95	74.21	38.44	19.42	2.65	2.16	1.56	0.1
		98.44	90.97	96.26	31.1	66.59	34.18	2.38	4.68	4.47	47.02	23.97	38.45	24.59	31.69	15.16	34.73	34.9	74.05	40.47	19.86	3.71	2.7	1.8	0.03
		98.56	90.55	96.69	32.65	60.07	37.17	2.17	4.27	4.35	50.05	25.48	39.9	24.44	31.48	15.13	35.17	34.73	73.12	41.13	19.2	2.37	0.65	1.55	0.37
		98.58	89.93	96.39	33.57	66.18	36	2.16	4.38	4.58	50.56	25.24	41.48	24.19	32.23	14.91	31.43	35.38	70.54	37.56	19.77	2.35	2.07	1.86	0.02
		98.58	90.05	96.8	31.98	63.25	37.03	2.37	4.44	4.74	50.42	23.57	40.65	21.94	31.27	15.26	33.14	34.59	71.64	41	18.43	3.6	1.38	1.65	0.03
		98.66	91.01	97.04	32.04	65.45	36.5	2.37	4.29	4.32	50.27	25.11	39.69	23.51	32.87	14.5	31.2	31.56	70.16	37.92	19.03	3.93	2.64	1.43	0.27
		98.68	91.99	96.67	31.19	63.03	37.45	2.14	4.31	4.34	47.47	24.59	41.49	24.13	32.56	14.53	32.12	34.56	68.77	40.09	19.79	4.2	1.83	1.78	0.16
		98.87	92.72	96.68	34.89	62.8	34.28	2.28	4.67	4.39	48.25	25.72	37.86	23.83	31.43	15.36	34.77	33.43	73.07	37.65	19.71	3.46	1.33	1.75	0.09
		99.04	91.41	96.76	32.73	62.33	37.22	2.32	4.34	4.59	47.76	24.02	40.61	22.39	30.31	15.62	32.15	33.39	70.59	38.69	19.4	4.17	2.08	1.92	0.48
		99.07	91.32	98.19	34.52	62.28	34.7	2.13	4.21	4.77	49.79	25.59	41.93	22.91	29.99	14.74	34.97	33.93	72.3	38.6	20.47	4.03	1.67	1.48	0.14
		99.43	91.52	98.07	32.64	62.14	38.31	2.33	4.18	4.62	49.46	25.41	37.83	24.67	32.52	14.68	33.75	32.67	70.4	40.18	18.27	2.25	1.7	1.57	0.31
		99.47	91.85	97.24	31.95	63.84	36.25	2.29	4.18	4.45	49.36	24.22	40.17	24.44	30.85	15.05	34.47	31.43	73.94	39.47	20.19	2.79	0.8	1.86	0.49
		99.7	92.98	98.63	31.73	61.71	37.81	2.22	4.27	4.28	49.48	23.91	39.89	23.83	32.16	15.62	33.02	32.74	75.76	40.01	19.7	3.74	2.11	1.93	0.29
		99.71	93.35	97.63	32.01	65.13	37.69	2.33	4.38	4.42	47.93	24.28	39.77	23.57	32.51	14.38	33.81	34.01	71.37	39.36	20.12	2.64	1.72	1.54	0.45
		99.84	91	98.21	33.07	61.7	35.41	2.21	4.19	4.66	47.97	23.19	40.54	24.34	29.35	14.11	31.56	32	75.25	40.67	20.21	2.93	2.12	1.7	0.4
		100.35	92.61	99.53	33.6	71.3	41.11	2.43	5.01	4.43	52.45	27.74	39.24	23.24	34.05	14.49	36.03	35.82	75.73	39.14	22.01	3.37	1.84	1.89	0.08
		100.86	93.68	99.7	35.51	72.61	35.58	2.32	4.34	4.74	49.03	24.19	44.8	24.55	33.9	16.56	34.37	33.69	80.11	43.09	19.76	3.41	2.09	1.89	0.13
		101.52	93.1	100.39	33.86	71.88	39.43	2.34	4.86	4.5	48.61	26.4	42.67	25	35.48	15.8	32.95	34.99	74.96	45.13	20.76	2.76	2.15	1.62	0.16
		101.57	94.88	99.55	34.86	64.34	39.82	2.44	4.53	4.71	49.84	26.43	42.24	26.42	31.52	15.14	36.61	35.58	73.68	45	21.31	3.84	1.25	1.74	0.21
		101.6	94	100.17	34.75	64.89	36.19	2.59	4.48	4.94	52.44	26.9	39.83	25.62	32.53	15.36	34.08	33.35	74.1	44.74	20.73	2.4	2.77	1.87	0.46
		102.03	94.93	100.94	38.01	67	38.97	2.38	4.9	5.04	52.76	24.36	39.43	24.2	32	15.16	32.96	35.7	82.04	42.32	21.49	2.31	2.24	1.89	0.16
		102.07	95.21	100.68	35.99	64.36	38.02	2.53	4.38	4.58	50.4	26.73	42.68	25.45	34.54	14.49	34.6	34.8	79.81	42.97	21.87	3.42	2.37	1.53	0.38
		102.23	93.29	100.46	32.37	68.06	40.73	2.56	4.8	4.79	55.72	27.53	40.79	26.47	34.62	15.52	35.6	35.85	77.71	42.4	19.77	4.05	2.67	1.62	0.41
		102.24	95.64	101.15	33.47	69.66	35.62	2.23	4.42	4.74	52.38	26.86	39.84	23.2	35.7	14.85	34.25	34.46	72.25	40.37	19.23	3.02	2.73	1.88	0.2
		102.61	95.04	100.33	37.18	72.33	39.92	2.55	4.89	4.72	49.46	24.35	44.23	25.96	34.27	14.52	33.61	38.15	81.53	41.6	20.27	3.3	2.15	1.93	0.06
		102.63	94.43	101.2	35.9	68.94	35.82	2.25	4.79	5.18	49.42	26.42	41.8	26.46	35.4	15.13	32.87	38.47	75.61	43.05	21.27	3.58	1.87	1.84	0.12
		102.66	94.29	100.93	35.37	70.09	37.23	2.51	4.91	4.89	51.75	24.01	39.92	23.64	35.24	16.36	34.99	36.02	75.21	41.59	21.94	3.29	2.16	1.88	0.3
		103.12	94.71	101.65	36.71	70.33	38.09	2.44	5.09	4.73	53.26	27.45	43.95	23.61	32.23	15.11	32.86	33.03	83.63	40.6	19.15	4.21	2.58	1.57	0.41
		103.2	94.79	102.35	32.95	69.72	40.69	2.25	4.96	4.57	51.64	26.22	45.39	24.48	33.96	16.83	35.63	32.87	74.09	44.81	21.31	3.62	1.25	1.88	0.25
		103.65	95.76	102.25	34.06	63.98	36.93	2.35	4.83	4.83	52.38	24.61	39.67	25.54	34.48	15	34.01	33.55	82.81	38.91	21	2.54	2.18	1.92	0.07
		103.75	96.59	102.66	36.26	66.47	37.08	2.48	5.05	4.78	52.97	26.26	40.77	26.24	32.79	14.73	32.56	37.29	82.23	44.55	22.36	3.05	1.4	1.83	0.45
		103.86	95.22	102.81	33.56	68.52	36.89	2.45	4.71	4.94	49.08	24.95	40.3	24.07	32.77	15.57	36.17	34.89	81.27	44.19	21.4	2.63	1.59	1.74	0.51
		104.09	97.49	102.09	34.25	62.59	36.37	2.48	4.75	4.51	50.68	27.66	39.56	26.32	30.82	15.94	33.08	33.16	71.86	39.2	20.74	2.76	2.22	1.68	0.34
		104.11	97.88	102.07	36.63	70.22	40.2	2.3	4.73	4.82	48.95	26.9	41.29	23.01	33.56	15.53	38	38.41	73.14	42.8	20.89	2.76	1.65	1.95	0.49
		104.12	96.97	101.96	34.41	67.75	36.39	2.3	4.95	5.05	50.03	28.14	42.54	22.97	35.15	14.84	36.35	37.74	73.7	39.23	19.7	3.06	1.3	1.79	0.24
		104.43	95.73	103.14	37.1	69.05	39.97	2.31	4.53	4.73	54.35	24.43	41.16	24.84	33.81	14.94	35.32	33.47	78.94	39.13	22.39	3.7	1.06	1.57	0.46
		104.57	97.36	103.6	36.05	63.53	39.18	2.56	4.57	4.93	50.71	26.42	45.4	23.36	35.1	15.78	32.63	38.5	77.98	45.13	21.44	4.27	1.56	1.76	0.34
		104.05	98.11	103.06	37.58	69.05	40.93	2.62	5.01	5.48	55.2	27.67	45.22	26.29	35.1	16.72	37.49	37.78	82.13	44.43	21.82	2.25	1.55	1.99	0.04
		104.15	97.99	102.95	40.25	73.95	43.83	2.8	5.37	5.87	59.11	29.63	48.42	28.16	37.59	17.91	40.15	40.47	87.96	47.58	23.37	2.49	1.91	1.7	0.03
		104.26	95.97	103.01	39.27	72.15	42.77	2.74	5.24	5.73	57.67	28.91	47.24	27.47	36.68	17.47	39.17	39.48	85.81	46.42	22.8	3.32	1.47	1.85	0.04
		104.74	97.01	103.67	37.94	69.7	41.31	2.64	5.06	5.54	55.71	27.93	45.64	26.54	35.43	16.88	37.84	38.14	82.9	44.85	22.03	2.24	1.61	1.63	0.29
		105.04	96.65	103.75	37.33	68.59	40.66	2.6	4.98	5.45	54.83	27.48	44.91	26.12	34.87	16.61	37.24	37.53	81.58	44.13	21.68	3.03	1.33	1.98	0.17
		105.25	97.11	104.27	33.21	61.01	36.16	2.31	4.43	4.85	48.77	24.45	39.95	23.23	31.01	14.77	33.12	33.38	72.56	39.25	19.28	4.35	2.59	1.96	0.1
		105.33	98.83	104.12	35.37	64.98	38.52	2.46	4.72	5.16	51.94	26.04	42.55	24.74	33.03	15.74	35.28	35.56	77.29	41.81	20.54	2.75	2.53	2.01	0.25
		105.34	98.76	104.04	36.38	66.84	39.62	2.53	4.85	5.31	53.43	26.79	43.77	25.45	33.98	16.19	36.29	36.58	79.5	43.01	21.13	3.73	1.31	1.73	0.09
		105.35	97.61	104.37	35.63	65.46	38.8	2.48	4.75	5.2	52.32	26.23	42.86	24.92	33.28	15.85	35.54	35.82	77.86	42.12	20.69	3.03	2.76	1.67	0.31
		105.44	97.07	104.2	35.62	65.45	38.79	2.48	4.75	5.2	52.31	26.23	42.86	24.92	33.27	15.85	35.53	35.81	77.84	42.11	20.69	4.26	1.91	1.72	0.43
		105.63	96.79	104.45	38.26	70.28	41.66	2.67	5.1	5.58	56.18	28.16	46.02	26.76	35.73	17.02	38.16	38.46	83.6	45.22	22.22	4.26	1.13	1.92	0.36
		105.64	98.9	104.59	35.58	65.37	38.75	2.48	4.74	5.19	52.25	26.2	42.81	24.89	33.23	15.83	35.49	35.77	77.75	42.06	20.66	3.18	1.51	2.04	0.35
		105.75	99.18	104.47	38.88	71.42	42.34	2.71	5.18	5.67	57.09	28.62	46.77	27.2	36.31	17.3	38.78	39.08	84.95	45.96	22.58	3.75	1.98	1.73	0.31
		106.26	98.58	105.14	38.64	70.98	42.08	2.69	5.15	5.64	56.74	28.44	46.48	27.03	36.08	17.19	38.54	38.84	84.43	45.67	22.44	3.17	2.82	2.11	0.13
		106.34	99.24	105.13	37.56	69.01	40.9	2.62	5.01	5.48	55.16	27.65	45.19	26.27	35.08	16.71	37.46	37.76	82.08	44.4	21.81	3.22	1.05	2.13	0.41
		106.37	98.25	105.38	37.74	69.34	41.1	2.63	5.03	5.51	55.43	27.79	45.41	26.4	35.25	16.79	37.65	37.94	82.48	44.62	21.92	3.81	2.73	1.78	0.21
		106.56	98.4	104.79	34.34	63.1	37.4	2.39	4.58	5.01	50.44	25.28	41.32	24.02	32.07	15.28	34.26	34.53	75.05	40.6	19.94	3	1.53	2.14	0.31
		106.57	99.95	105.22	38.6	70.92	42.04	2.69	5.15	5.63	56.69	28.42	46.44	27	36.05	17.18	38.5	38.81	84.35	45.63	22.42	3.77	0.86	1.75	0.46
		106.92	99.3	105.84	37.26	68.46	40.58	2.6	4.97	5.44	54.73	27.43	44.83	26.07	34.8	16.58	37.17	37.46	81.43	44.05	21.64	3.79	2.46	1.91	0.41
		106.94	100.16	105.27	34.7	63.76	37.79	2.42	4.63	5.06	50.96	25.55	41.75	24.28	32.41	15.44	34.61	34.89	75.83	41.02	20.15	3.02	1.24	1.9	0.21
		107.02	98.63	105.25	36.71	67.45	39.98	2.56	4.89	5.36	53.91	27.03	44.17	25.68	34.29	16.33	36.62	36.91	80.22	43.4	21.32	2.47	2.66	1.98	0.27
		107.27	99.81	106.23	34.02	62.51	37.05	2.37	4.54	4.96	49.97	25.05	40.93	23.8	31.78	15.14	33.94	34.21	74.35	40.22	19.76	2.47	1.3	1.8	0.31
		107.31	98.93	105.99	36.74	67.49	40.01	2.56	4.9	5.36	53.95	27.05	44.19	25.7	34.31	16.34	36.64	36.93	80.27	43.43	21.33	3.08	2.3	1.78	0.33
		107.64	100.42	106.28	34.18	62.8	37.22	2.38	4.56	4.99	50.2	25.16	41.12	23.91	31.92	15.21	34.09	34.36	74.69	40.41	19.85	4.12	1.09	2.15	0.22
		107.76	100.67	106.3	39.03	71.7	42.5	2.72	5.2	5.69	57.31	28.73	46.95	27.3	36.45	17.36	38.93	39.23	85.28	46.13	22.66	4.02	1.61	1.85	0.07
		108.01	100.49	106.67	34.54	63.46	37.62	2.41	4.61	5.04	50.73	25.43	41.55	24.16	32.26	15.37	34.45	34.72	75.48	40.83	20.06	3.69	2.24	1.84	0.44
		108.12	100.31	106.98	35.41	65.05	38.56	2.47	4.72	5.17	52	26.07	42.59	24.77	33.07	15.75	35.31	35.59	77.37	41.85	20.56	2.57	2.02	1.83	0.18
		108.25	99.73	106.75	39.67	72.89	43.21	2.76	5.29	5.79	58.26	29.21	47.73	27.75	37.05	17.65	39.57	39.89	86.7	46.9	23.04	3.6	1.06	1.95	0.31
		108.29	101.73	107.33	38.89	71.45	42.35	2.71	5.19	5.67	57.11	28.63	46.79	27.2	36.32	17.3	38.79	39.1	84.98	45.97	22.58	3.67	0.8	2.16	0.1
		108.46	100.66	107.5	36.98	67.95	40.28	2.58	4.93	5.4	54.31	27.23	44.49	25.87	34.54	16.45	36.89	37.18	80.82	43.72	21.48	4.5	2.85	1.69	0.37
		108.57	101.97	106.92	39.05	71.74	42.52	2.72	5.21	5.7	57.34	28.75	46.97	27.31	36.47	17.37	38.95	39.25	85.32	46.16	22.67	3.77	2.03	1.96	0.42
		108.73	101.79	107.56	35.33	64.9	38.47	2.46	4.71	5.15	51.88	26.01	42.5	24.71	32.99	15.72	35.24	35.52	77.2	41.76	20.51	4.17	1.08	2.1	0.17
		108.83	102.17	107.32	37.74	69.34	41.1	2.63	5.03	5.51	55.43	27.79	45.41	26.4	35.25	16.79	37.65	37.94	82.48	44.62	21.92	4.49	1.08	2.09	0.22
		108.87	102.14	107.43	36.01	66.16	39.22	2.51	4.8	5.25	52.88	26.51	43.32	25.19	33.63	16.02	35.92	36.2	78.69	42.57	20.91	3.5	2.78	2.09	0.33
		109.03	101.62	108.04	33.89	62.26	36.91	2.36	4.52	4.95	49.77	24.95	40.77	23.71	31.65	15.08	33.8	34.07	74.05	40.06	19.68	2.53	1.19	1.75	0.5
		109.28	100.57	107.55	38.76	71.21	42.21	2.7	5.17	5.66	56.92	28.54	46.63	27.11	36.2	17.25	38.66	38.97	84.7	45.82	22.51	4.1	0.89	2.14	0.07
		109.51	102.12	108.51	35.5	65.22	38.66	2.47	4.73	5.18	52.13	26.13	42.7	24.83	33.15	15.79	35.41	35.69	77.57	41.96	20.61	4.31	0.95	2.06	0.14
		109.71	101.85	107.97	33.01	60.65	35.95	2.3	4.4	4.82	48.48	24.3	39.71	23.09	30.83	14.69	32.93	33.19	72.13	39.02	19.17	3.02	0.96	2.1	0.31
		109.8	102.38	108.03	33.59	61.71	36.58	2.34	4.48	4.9	49.33	24.73	40.41	23.5	31.37	14.95	33.5	33.77	73.4	39.71	19.51	3.36	1.92	1.79	0.39
		109.83	103.16	108.21	33.67	61.87	36.67	2.35	4.49	4.91	49.45	24.79	40.51	23.56	31.45	14.98	33.59	33.85	73.59	39.81	19.55	3.17	1.79	1.74	0.16
		110.19	103.6	108.88	33.5	61.55	36.48	2.33	4.47	4.89	49.2	24.66	40.3	23.44	31.29	14.91	33.42	33.68	73.21	39.6	19.45	3.32	2.44	2.16	0.46
		110.24	103.28	109.22	33.89	62.25	36.9	2.36	4.52	4.94	49.76	24.95	40.77	23.7	31.65	15.08	33.8	34.07	74.05	40.06	19.68	3.91	2.4	1.79	0.43
		110.32	101.75	109.03	34.42	63.24	37.49	2.4	4.59	5.02	50.55	25.34	41.41	24.08	32.15	15.32	34.33	34.61	75.22	40.69	19.99	3.31	1.21	1.88	0.41
		110.35	101.47	108.7	34.09	62.62	37.12	2.37	4.54	4.97	50.06	25.09	41.01	23.84	31.83	15.17	34	34.27	74.48	40.29	19.79	3.5	2.12	1.94	0.17
		110.43	101.91	108.74	34.48	63.35	37.55	2.4	4.6	5.03	50.64	25.39	41.48	24.12	32.2	15.34	34.39	34.67	75.35	40.76	20.02	4.53	0.91	2.14	0.09
		110.45	103.56	109.42	33.33	61.23	36.29	2.32	4.44	4.86	48.94	24.53	40.09	23.31	31.12	14.83	33.24	33.5	72.82	39.39	19.35	2.96	2.32	2.05	0.47
		110.55	103.2	108.79	34.02	62.51	37.05	2.37	4.54	4.96	49.97	25.05	40.93	23.8	31.78	15.14	33.94	34.21	74.35	40.22	19.76	3.76	1.74	1.96	0.52
		110.95	103	109.37	34.22	62.88	37.27	2.38	4.56	4.99	50.26	25.2	41.17	23.94	31.96	15.23	34.14	34.41	74.79	40.46	19.87	2.76	1.78	1.9	0.35
		111.08	103.6	109.67	33.94	62.35	36.96	2.36	4.53	4.95	49.84	24.99	40.83	23.74	31.7	15.1	33.85	34.12	74.16	40.12	19.71	3.66	1.42	2.17	0.5
		111.08	102.86	110.04	34.35	63.11	37.41	2.39	4.58	5.01	50.45	25.29	41.32	24.03	32.08	15.28	34.26	34.53	75.06	40.61	19.95	3.22	1.82	2	0.25
		111.1	102.25	109.52	34.53	63.45	37.61	2.41	4.6	5.04	50.72	25.42	41.55	24.16	32.25	15.36	34.44	34.72	75.46	40.82	20.05	3.79	2.49	2.17	0.45
		111.3	104.41	109.81	34.58	63.54	37.66	2.41	4.61	5.05	50.79	25.46	41.61	24.19	32.3	15.39	34.5	34.77	75.57	40.88	20.08	4.28	1.4	1.97	0.36
		111.45	104.05	110.09	35.02	64.34	38.14	2.44	4.67	5.11	51.43	25.78	42.13	24.5	32.71	15.58	34.93	35.21	76.53	41.4	20.34	4.19	1.67	2.03	0.04
		111.5	104.34	110.01	34.56	63.5	37.64	2.41	4.61	5.04	50.76	25.45	41.58	24.18	32.28	15.38	34.48	34.75	75.53	40.86	20.07	4.26	2.97	1.74	0.3
		112.03	103.17	110.43	34.99	64.28	38.1	2.44	4.67	5.11	51.38	25.76	42.09	24.47	32.68	15.57	34.9	35.17	76.46	41.36	20.32	2.47	0.84	2.09	0.53
		112.15	105.04	110.45	34.6	63.57	37.68	2.41	4.61	5.05	50.81	25.47	41.63	24.2	32.31	15.4	34.51	34.79	75.61	40.9	20.09	2.46	0.95	2.23	0.39
		112.31	104.3	111.16	35.2	64.67	38.34	2.45	4.69	5.14	51.7	25.92	42.35	24.62	32.88	15.66	35.11	35.39	76.92	41.61	20.44	2.87	0.94	1.78	0.44
		112.55	104.96	111.16	34.91	64.14	38.02	2.43	4.65	5.09	51.27	25.7	42	24.42	32.6	15.53	34.82	35.1	76.29	41.27	20.27	2.54	2.27	2.04	0.29
		112.6	104.98	110.98	35.5	65.22	38.66	2.47	4.73	5.18	52.13	26.13	42.7	24.83	33.15	15.79	35.41	35.69	77.57	41.96	20.61	3.72	2.27	1.78	0.27
		112.86	105.83	111.57	35.14	64.56	38.27	2.45	4.69	5.13	51.61	25.87	42.28	24.58	32.82	15.64	35.05	35.33	76.79	41.54	20.41	3.67	2.54	2.2	0.16
		112.88	105.93	110.96	35.5	65.22	38.66	2.47	4.73	5.18	52.13	26.13	42.7	24.83	33.15	15.79	35.41	35.69	77.57	41.96	20.61	3.92	3.01	1.97	0.2
		113.06	104.5	111.94	35.62	65.43	38.79	2.48	4.75	5.2	52.3	26.22	42.85	24.91	33.26	15.85	35.52	35.81	77.83	42.1	20.68	3.43	0.97	1.97	0.09
		113.14	105.07	112.13	35.62	65.44	38.79	2.48	4.75	5.2	52.31	26.22	42.85	24.92	33.27	15.85	35.53	35.81	77.83	42.11	20.68	4.37	2.07	2.14	0.46
		113.21	105.24	111.54	36.17	66.44	39.39	2.52	4.82	5.28	53.11	26.63	43.51	25.3	33.78	16.09	36.07	36.36	79.03	42.75	21	4.1	1.9	1.82	0.43
		113.3	105.44	112.17	36.21	66.52	39.43	2.52	4.83	5.28	53.18	26.66	43.56	25.33	33.82	16.11	36.12	36.4	79.13	42.8	21.03	4.01	1.76	1.96	0.5
		113.31	105.81	112.29	36.35	66.77	39.58	2.53	4.85	5.3	53.38	26.76	43.73	25.42	33.94	16.17	36.25	36.54	79.42	42.96	21.11	3.66	2.26	1.89	0.21
		113.32	105.28	112.15	36.6	67.24	39.86	2.55	4.88	5.34	53.75	26.95	44.03	25.6	34.18	16.28	36.51	36.8	79.98	43.27	21.25	3.71	2.42	2.06	0.14
		113.34	105.77	112.23	36.85	67.71	40.14	2.57	4.91	5.38	54.12	27.13	44.34	25.78	34.42	16.4	36.76	37.05	80.53	43.57	21.4	3.01	0.97	1.85	0.41
		113.46	105.36	111.48	36.42	66.91	39.66	2.54	4.86	5.31	53.49	26.81	43.81	25.48	34.01	16.2	36.33	36.61	79.58	43.05	21.15	4.24	1.63	1.89	0.07
		113.48	106.09	112.21	35.93	66.01	39.13	2.5	4.79	5.24	52.76	26.45	43.22	25.13	33.55	15.99	35.84	36.12	78.51	42.47	20.86	4.07	2.78	1.88	0.21
		113.72	105.1	112.45	36.6	67.24	39.86	2.55	4.88	5.34	53.75	26.95	44.03	25.6	34.18	16.28	36.51	36.8	79.98	43.27	21.25	2.77	1.32	1.91	0.5
		113.78	105.43	112.41	36.73	67.47	39.99	2.56	4.9	5.36	53.93	27.04	44.18	25.69	34.3	16.34	36.63	36.92	80.25	43.41	21.33	4.47	1.26	1.86	0.17
		114	106.47	112.66	36.76	67.53	40.03	2.56	4.9	5.36	53.98	27.06	44.22	25.71	34.33	16.35	36.66	36.95	80.32	43.45	21.34	3.1	2.42	2.21	0.33
		114.04	107.12	112.86	37.02	68.02	40.32	2.58	4.94	5.4	54.37	27.26	44.54	25.9	34.58	16.47	36.93	37.22	80.9	43.77	21.5	2.9	1.57	2.19	0.26
		114.08	107	113.06	36.54	67.13	39.79	2.55	4.87	5.33	53.66	26.9	43.96	25.56	34.12	16.26	36.45	36.73	79.84	43.19	21.22	2.68	1.28	1.93	0.49
		114.14	106.88	112.91	36.91	67.82	40.2	2.57	4.92	5.39	54.21	27.18	44.41	25.82	34.47	16.42	36.82	37.11	80.66	43.63	21.43	3.37	2.29	1.83	0.42
		114.15	107.05	112.42	37.02	68.01	40.32	2.58	4.94	5.4	54.37	27.26	44.54	25.9	34.57	16.47	36.93	37.22	80.9	43.76	21.5	3.33	2.9	2.18	0.27
		114.26	106.67	112.79	36.53	67.11	39.78	2.54	4.87	5.33	53.65	26.89	43.95	25.55	34.11	16.25	36.43	36.72	79.82	43.18	21.21	4.61	2.47	1.78	0.05
		114.3	105.73	112.4	36.99	67.96	40.29	2.58	4.93	5.4	54.33	27.24	44.5	25.88	34.55	16.46	36.9	37.19	80.84	43.73	21.48	3.72	3.05	2.21	0.32
		114.36	105.5	112.46	36.98	67.95	40.28	2.58	4.93	5.4	54.31	27.23	44.49	25.87	34.54	16.45	36.89	37.18	80.82	43.72	21.48	3.29	1.89	2.14	0.05
		114.39	105.82	112.61	36.73	67.47	39.99	2.56	4.9	5.36	53.93	27.04	44.18	25.69	34.3	16.34	36.63	36.92	80.25	43.41	21.33	3.12	2.64	2.1	0.17
		114.46	107.53	112.83	37.21	68.36	40.52	2.59	4.96	5.43	54.64	27.39	44.76	26.03	34.75	16.55	37.11	37.41	81.31	43.98	21.61	3.97	1.38	1.8	0.12
		114.47	105.93	112.75	37.28	68.49	40.6	2.6	4.97	5.44	54.75	27.45	44.85	26.08	34.82	16.59	37.19	37.48	81.47	44.07	21.65	2.91	2.21	1.83	0.11
		114.55	105.69	112.88	37.4	68.72	40.73	2.61	4.99	5.46	54.93	27.54	45	26.16	34.93	16.64	37.31	37.6	81.74	44.22	21.72	2.87	2.12	2.05	0.13
		114.74	106.86	113.42	37.25	68.44	40.57	2.6	4.97	5.44	54.71	27.42	44.82	26.06	34.79	16.57	37.16	37.45	81.4	44.04	21.63	2.55	2.44	2.29	0.11
		114.78	108.13	112.92	37.74	69.33	41.1	2.63	5.03	5.51	55.42	27.78	45.4	26.4	35.24	16.79	37.64	37.94	82.46	44.61	21.91	4.36	1.64	2.16	0.42
		114.88	106.85	113.39	37.28	68.49	40.6	2.6	4.97	5.44	54.75	27.44	44.85	26.08	34.82	16.59	37.18	37.48	81.46	44.07	21.65	2.73	2.39	2.25	0.06
		115.08	106.58	113.93	37.62	69.11	40.97	2.62	5.02	5.49	55.24	27.69	45.26	26.31	35.13	16.74	37.52	37.82	82.2	44.47	21.84	4.29	1.18	2.01	0.45
		115.16	106.42	113.17	37.64	69.16	40.99	2.62	5.02	5.49	55.28	27.71	45.28	26.33	35.15	16.75	37.55	37.84	82.25	44.5	21.86	3.68	1.81	1.88	0.38
		115.18	106.94	114.03	37.78	69.4	41.14	2.63	5.04	5.51	55.48	27.81	45.45	26.43	35.28	16.81	37.68	37.98	82.55	44.66	21.94	3.37	2.18	2.08	0.37
		115.24	108.5	113.42	37.97	69.75	41.35	2.65	5.06	5.54	55.76	27.95	45.68	26.56	35.46	16.89	37.87	38.17	82.97	44.88	22.05	2.56	1.3	2.08	0.33
		115.29	108.54	113.98	38.3	70.37	41.71	2.67	5.11	5.59	56.25	28.2	46.08	26.79	35.77	17.04	38.2	38.5	83.69	45.28	22.24	4.58	2.06	2.27	0.18
		115.34	108.72	113.45	38	69.82	41.38	2.65	5.07	5.55	55.81	27.98	45.72	26.58	35.49	16.91	37.9	38.2	83.04	44.92	22.07	4.31	2.23	2.03	0.15
		115.37	106.98	113.7	37.96	69.74	41.34	2.64	5.06	5.54	55.75	27.95	45.67	26.55	35.45	16.89	37.86	38.16	82.95	44.87	22.04	2.88	2.52	1.83	0.51
		115.42	106.59	114.15	38	69.82	41.39	2.65	5.07	5.55	55.81	27.98	45.72	26.59	35.49	16.91	37.91	38.21	83.05	44.93	22.07	3.63	2.46	2.1	0.32
		115.43	108.05	113.8	38.47	70.68	41.9	2.68	5.13	5.61	56.5	28.32	46.28	26.91	35.93	17.12	38.37	38.68	84.07	45.48	22.34	4.7	2.82	1.87	0.53
		115.46	107.86	113.69	38.63	70.97	42.07	2.69	5.15	5.64	56.73	28.44	46.47	27.02	36.08	17.19	38.53	38.84	84.41	45.66	22.43	3.11	2.96	1.85	0.51
		115.69	108	114.4	38.28	70.33	41.69	2.67	5.1	5.59	56.22	28.18	46.05	26.78	35.75	17.03	38.18	38.48	83.65	45.25	22.23	4.05	2.5	1.84	0.23
		115.75	107.96	114.12	38.12	70.03	41.51	2.66	5.08	5.56	55.98	28.06	45.86	26.67	35.6	16.96	38.02	38.32	83.3	45.06	22.14	3.24	1.68	2.12	0.11
		115.8	108.84	114.59	38.39	70.53	41.81	2.67	5.12	5.6	56.38	28.26	46.19	26.86	35.85	17.08	38.29	38.6	83.89	45.38	22.29	3.55	1.35	1.83	0.47
		116.12	108.01	114.93	38.79	71.26	42.24	2.7	5.17	5.66	56.96	28.56	46.66	27.13	36.23	17.26	38.69	39	84.76	45.85	22.52	2.73	2.63	2.14	0.26
		116.15	109.43	115.09	39.11	71.85	42.59	2.72	5.21	5.71	57.44	28.79	47.05	27.36	36.53	17.4	39.01	39.32	85.46	46.23	22.71	4.72	1.17	2.11	0.53
		116.16	109.24	114.33	38.34	70.44	41.75	2.67	5.11	5.59	56.31	28.23	46.13	26.82	35.81	17.06	38.24	38.55	83.78	45.32	22.26	4.57	1.52	2.2	0.47
		116.25	108.19	114.87	38.55	70.83	41.99	2.69	5.14	5.63	56.62	28.38	46.38	26.97	36.01	17.15	38.46	38.76	84.25	45.58	22.39	3.24	1.65	2.27	0.08
		116.32	109.01	114.87	38.68	71.07	42.13	2.7	5.16	5.64	56.81	28.48	46.54	27.06	36.13	17.21	38.58	38.89	84.53	45.73	22.46	4.36	2.17	2.01	0.1
		116.47	108.68	114.76	38.66	71.02	42.1	2.69	5.15	5.64	56.77	28.46	46.51	27.04	36.1	17.2	38.56	38.86	84.47	45.7	22.45	3.7	1.49	1.91	0.35
		116.49	108.15	115.19	39.05	71.74	42.53	2.72	5.21	5.7	57.35	28.75	46.98	27.32	36.47	17.37	38.95	39.26	85.33	46.16	22.68	2.68	2.82	2.07	0.35
		116.54	109.54	114.95	38.99	71.62	42.46	2.72	5.2	5.69	57.25	28.7	46.9	27.27	36.41	17.35	38.89	39.19	85.19	46.09	22.64	3.61	1.51	2.23	0.37
		116.56	109.63	115.05	38.92	71.51	42.39	2.71	5.19	5.68	57.16	28.66	46.83	27.23	36.35	17.32	38.82	39.13	85.06	46.01	22.6	2.67	2.59	2.26	0.49
		116.59	108.15	114.62	38.85	71.38	42.31	2.71	5.18	5.67	57.06	28.6	46.74	27.18	36.29	17.29	38.75	39.06	84.9	45.93	22.56	3.18	0.97	1.85	0.51
		116.8	109.04	115.34	39.03	71.71	42.51	2.72	5.2	5.7	57.32	28.74	46.96	27.3	36.45	17.37	38.93	39.24	85.29	46.14	22.67	3.72	2.01	1.98	0.51
		117.13	109.61	116.09	39.02	71.69	42.49	2.72	5.2	5.69	57.3	28.73	46.94	27.29	36.44	17.36	38.92	39.23	85.26	46.13	22.66	3.69	1.54	1.93	0.29
		117.15	109.35	115.45	38.91	71.49	42.37	2.71	5.19	5.68	57.14	28.65	46.81	27.22	36.34	17.31	38.81	39.12	85.03	46	22.6	3.01	1.89	2.08	0.5
		117.36	110.07	115.73	38.96	71.59	42.43	2.71	5.2	5.69	57.22	28.69	46.88	27.26	36.39	17.34	38.87	39.17	85.15	46.06	22.63	4.8	1.33	2.21	0.14
		117.4	110.4	116	39.65	72.85	43.18	2.76	5.29	5.79	58.23	29.19	47.7	27.74	37.03	17.64	39.55	39.86	86.64	46.87	23.02	2.66	3.04	2.3	0.2
		117.59	110.31	115.63	39.76	73.05	43.3	2.77	5.3	5.8	58.39	29.27	47.83	27.81	37.13	17.69	39.66	39.97	86.88	47	23.09	3.34	2.22	2.2	0.11
		117.62	109.08	116.15	38.99	71.62	42.46	2.72	5.2	5.69	57.25	28.7	46.9	27.27	36.41	17.35	38.89	39.19	85.19	46.09	22.64	3.52	2.15	2.07	0.31
		117.81	109.38	116.58	39.86	73.24	43.41	2.78	5.32	5.82	58.54	29.35	47.96	27.89	37.23	17.74	39.76	40.08	87.11	47.12	23.15	3.72	1.88	2.06	0.18
		117.82	110.48	116.75	39.62	72.79	43.15	2.76	5.28	5.78	58.18	29.17	47.66	27.71	37	17.63	39.52	39.83	86.58	46.84	23.01	2.97	2.02	1.91	0.35
		117.86	109.14	116.86	39.6	72.76	43.13	2.76	5.28	5.78	58.16	29.16	47.64	27.7	36.99	17.62	39.5	39.81	86.54	46.82	23	3.05	2.46	2.34	0.1
		117.86	109.69	116.81	38.99	71.62	42.46	2.72	5.2	5.69	57.25	28.7	46.9	27.27	36.41	17.35	38.89	39.19	85.19	46.09	22.64	4.18	2.56	2.08	0.17
		118.04	111.53	116.64	38.9	71.46	42.36	2.71	5.19	5.68	57.12	28.64	46.79	27.21	36.33	17.31	38.8	39.1	85	45.98	22.59	2.89	3.11	2.28	0.05
		118.09	110.49	116.85	39.21	72.04	42.7	2.73	5.23	5.72	57.59	28.87	47.17	27.43	36.62	17.45	39.11	39.42	85.69	46.35	22.77	3.79	1.91	1.98	0.4
		118.1	109.77	116.7	39.1	71.83	42.58	2.72	5.21	5.71	57.42	28.78	47.04	27.35	36.51	17.4	39	39.31	85.44	46.22	22.7	4	1.6	2.23	0.55
		118.14	109.48	116.95	39.5	72.57	43.01	2.75	5.27	5.76	58.01	29.08	47.52	27.63	36.89	17.57	39.4	39.71	86.31	46.69	22.94	2.7	2.71	2.32	0.49
		118.21	109.92	116.61	39.56	72.68	43.08	2.76	5.27	5.77	58.1	29.13	47.59	27.67	36.95	17.6	39.46	39.77	86.45	46.77	22.97	3.27	2.89	1.85	0.21
		118.26	110.02	116.55	39.12	71.87	42.6	2.73	5.22	5.71	57.45	28.8	47.06	27.37	36.54	17.41	39.02	39.33	85.49	46.25	22.72	4.76	2.14	2	0.12
		118.28	109.84	116.55	39.58	72.72	43.1	2.76	5.28	5.78	58.13	29.14	47.62	27.69	36.96	17.61	39.48	39.79	86.49	46.79	22.98	3.93	2.94	2.28	0.5
		118.3	111.08	116.4	39	71.66	42.47	2.72	5.2	5.69	57.28	28.71	46.92	27.28	36.43	17.35	38.9	39.21	85.23	46.11	22.65	4.04	2.77	1.87	0.5
		118.48	110.38	117.24	39.54	72.65	43.07	2.76	5.27	5.77	58.08	29.11	47.57	27.66	36.93	17.59	39.44	39.76	86.41	46.75	22.96	3.28	2.74	1.9	0.44
		118.5	111.23	116.83	39.71	72.95	43.24	2.77	5.29	5.79	58.31	29.23	47.77	27.78	37.08	17.67	39.61	39.92	86.77	46.94	23.06	4.69	2.8	2.16	0.06
		118.6	110.2	116.8	39.78	73.08	43.32	2.77	5.3	5.8	58.42	29.29	47.86	27.83	37.15	17.7	39.68	39.99	86.93	47.02	23.1	4.39	3.09	2.19	0.48
		118.64	110.87	117.37	38.82	71.31	42.27	2.7	5.18	5.66	57	28.58	46.7	27.15	36.25	17.27	38.72	39.02	84.82	45.88	22.54	3.72	2.9	1.89	0.4
		118.79	109.94	117.67	39.64	72.83	43.17	2.76	5.29	5.78	58.22	29.19	47.69	27.73	37.02	17.64	39.54	39.86	86.63	46.86	23.02	2.71	2.37	2.14	0.06
		118.81	110.48	116.94	40.5	74.4	44.1	2.82	5.4	5.91	59.47	29.81	48.72	28.33	37.82	18.02	40.39	40.71	88.49	47.87	23.52	4.78	1.42	1.98	0.49
		118.82	111.88	117.61	39.88	73.26	43.43	2.78	5.32	5.82	58.56	29.36	47.97	27.9	37.24	17.74	39.78	40.09	87.14	47.14	23.16	2.74	2.6	1.96	0.33
		118.95	111.01	117.59	39.43	72.43	42.94	2.75	5.26	5.75	57.9	29.03	47.43	27.58	36.82	17.54	39.33	39.64	86.15	46.61	22.89	4.42	1.82	2.25	0.14
		119.05	110.5	118.03	40.49	74.39	44.09	2.82	5.4	5.91	59.46	29.81	48.71	28.32	37.81	18.01	40.38	40.7	88.48	47.86	23.51	2.7	2.17	2.09	0.33
		119.07	111.6	117.42	39.4	72.38	42.91	2.74	5.25	5.75	57.86	29.01	47.4	27.56	36.8	17.53	39.3	39.61	86.1	46.57	22.88	3.39	2.12	2.33	0.49
		119.46	110.9	116.41	39.97	73.44	43.53	2.78	5.33	5.83	58.7	29.43	48.09	27.96	37.33	17.79	39.87	40.19	87.35	47.25	23.21	4.38	2.53	2.36	0.51
		119.88	112.02	117.73	40.12	73.71	43.69	2.8	5.35	5.85	58.92	29.54	48.26	28.06	37.47	17.85	40.02	40.33	87.67	47.43	23.3	4.32	1.11	1.9	0.27
		120.28	112.41	117.17	40.25	73.94	43.83	2.8	5.37	5.87	59.11	29.63	48.42	28.15	37.59	17.91	40.14	40.46	87.95	47.58	23.37	3.75	2.68	2.13	0.29
		120.33	112.45	118.26	40.09	73.66	43.66	2.79	5.35	5.85	58.88	29.52	48.24	28.05	37.45	17.84	39.99	40.31	87.62	47.4	23.28	4.3	1.97	2.26	0.5
		121.3	112.86	118.55	39.96	73.41	43.52	2.78	5.33	5.83	58.68	29.42	48.07	27.95	37.32	17.78	39.86	40.17	87.32	47.24	23.2	4.29	2.39	2.03	0.11
		121.39	114.81	119.57	39.85	73.21	43.4	2.78	5.31	5.82	58.52	29.34	47.94	27.88	37.22	17.73	39.75	40.06	87.08	47.11	23.14	3.21	2.17	2.04	0.29
		121.53	114.72	118.54	39.99	73.46	43.55	2.79	5.33	5.83	58.72	29.44	48.11	27.97	37.34	17.79	39.88	40.2	87.38	47.27	23.22	3.87	3.16	2.28	0.26
		121.71	114.24	119.55	40.69	74.75	44.31	2.83	5.42	5.94	59.75	29.95	48.95	28.46	38	18.1	40.58	40.9	88.91	48.09	23.63	3.12	2.82	2.02	0.52
		121.74	113.33	119.53	39.61	72.78	43.14	2.76	5.28	5.78	58.18	29.16	47.66	27.71	37	17.62	39.51	39.82	86.56	46.83	23	4.09	1.62	1.99	0.29
		121.78	113.41	120.11	40.6	74.59	44.22	2.83	5.41	5.92	59.63	29.89	48.84	28.4	37.92	18.06	40.5	40.82	88.72	47.99	23.58	4.46	2.25	2.18	0.08
		121.84	114.29	119.29	39.83	73.18	43.38	2.77	5.31	5.81	58.49	29.32	47.92	27.86	37.2	17.72	39.73	40.04	87.04	47.08	23.13	3.74	1.66	2.38	0.35
		122.02	113.5	119.16	40.45	74.32	44.06	2.82	5.39	5.9	59.41	29.78	48.67	28.3	37.78	18	40.35	40.67	88.4	47.82	23.49	4.9	2.64	2.03	0.33
		122.06	114.65	120.16	40.2	73.86	43.78	2.8	5.36	5.87	59.04	29.6	48.36	28.12	37.54	17.89	40.1	40.41	87.85	47.52	23.34	3.16	2.59	2.05	0.35
		122.06	114.75	118.65	40.54	74.49	44.15	2.82	5.41	5.92	59.54	29.85	48.77	28.36	37.86	18.04	40.44	40.76	88.59	47.93	23.54	4.32	3.02	1.98	0.49
		122.44	114.09	120.24	39.95	73.39	43.5	2.78	5.33	5.83	58.66	29.41	48.06	27.94	37.31	17.77	39.84	40.16	87.29	47.22	23.2	3.46	2.99	2.15	0.07
		122.55	113.74	119.22	40.32	74.07	43.9	2.81	5.38	5.88	59.21	29.68	48.5	28.2	37.65	17.94	40.21	40.53	88.1	47.66	23.41	4.68	1.36	2.18	0.28
		122.62	115.63	120.38	40.09	73.66	43.66	2.79	5.35	5.85	58.88	29.52	48.23	28.04	37.44	17.84	39.99	40.31	87.61	47.39	23.28	2.97	1.57	2.33	0.36
		123.3	115	120.05	41.92	77.01	45.65	2.92	5.59	6.12	61.56	30.86	50.43	29.32	39.15	18.65	41.81	42.14	91.6	49.55	24.34	3.2	2.73	2.39	0.32
		123.33	115.35	121.3	41.68	76.57	45.39	2.9	5.56	6.08	61.2	30.68	50.14	29.15	38.92	18.54	41.57	41.9	91.07	49.27	24.2	3.63	1.69	2.36	0.44
		123.35	114.48	121.28	41.75	76.71	45.47	2.91	5.57	6.09	61.32	30.74	50.23	29.21	39	18.58	41.65	41.98	91.24	49.36	24.25	3.28	1.51	2.3	0.15
		123.84	115.04	121.48	40.84	75.03	44.48	2.85	5.45	5.96	59.98	30.07	49.13	28.57	38.14	18.17	40.74	41.06	89.25	48.28	23.72	3.03	1.04	2.26	0.34
		124.46	117.28	121.77	41.54	76.32	45.24	2.89	5.54	6.06	61.01	30.59	49.98	29.06	38.8	18.48	41.44	41.77	90.78	49.11	24.12	4.07	3	2.05	0.51
		124.46	116.49	122.7	41.48	76.2	45.17	2.89	5.53	6.05	60.91	30.54	49.9	29.01	38.74	18.45	41.37	41.7	90.63	49.03	24.08	4.84	1.53	1.98	0.23
		124.6	117.67	122.28	41.02	75.37	44.68	2.86	5.47	5.99	60.25	30.2	49.35	28.7	38.31	18.25	40.92	41.24	89.65	48.5	23.82	3.76	1.37	2.04	0.55
		124.86	116.12	122.52	41.84	76.86	45.56	2.91	5.58	6.1	61.44	30.8	50.33	29.26	39.07	18.61	41.73	42.06	91.42	49.45	24.29	3.62	1.25	2.29	0.49
		125.34	117.77	122.13	41.11	75.52	44.77	2.86	5.48	6	60.37	30.26	49.45	28.75	38.39	18.29	41	41.33	89.82	48.59	23.87	4.65	1.69	2.12	0.31
		125.45	117.34	122.58	41.2	75.69	44.87	2.87	5.49	6.01	60.5	30.33	49.56	28.82	38.48	18.33	41.09	41.42	90.03	48.7	23.92	5	1.24	2.06	0.26
		125.58	116.92	122.58	42.39	77.87	46.16	2.95	5.65	6.18	62.25	31.2	50.99	29.65	39.58	18.86	42.28	42.61	92.62	50.1	24.61	3.68	2.79	2.04	0.42
		125.72	117.96	123.21	42.31	77.73	46.07	2.95	5.64	6.17	62.13	31.15	50.9	29.59	39.51	18.82	42.2	42.53	92.45	50.01	24.57	4.54	2.09	1.99	0.5
		125.83	117.6	124.32	41.74	76.69	45.46	2.91	5.57	6.09	61.3	30.73	50.22	29.2	38.98	18.57	41.63	41.96	91.21	49.34	24.24	3.09	2.39	2.31	0.56
		126.14	117.32	123.08	41.29	75.85	44.96	2.88	5.5	6.02	60.63	30.4	49.67	28.88	38.56	18.37	41.18	41.51	90.22	48.8	23.97	3.73	1.37	2.48	0.16
		126.14	117.61	123.78	41.52	76.29	45.22	2.89	5.54	6.06	60.98	30.57	49.95	29.05	38.78	18.47	41.42	41.75	90.74	49.09	24.11	3.04	2.75	2.42	0.56
		126.48	118.24	123.69	42.41	77.91	46.18	2.95	5.65	6.19	62.28	31.22	51.02	29.66	39.6	18.87	42.3	42.63	92.66	50.13	24.62	4.04	1.79	2.39	0.44
		126.5	118.32	123.65	41.14	75.59	44.81	2.87	5.49	6	60.42	30.29	49.5	28.78	38.42	18.31	41.04	41.36	89.91	48.64	23.89	3.76	1.25	2.35	0.52
		126.76	118.7	124.12	42.1	77.34	45.84	2.93	5.61	6.14	61.82	30.99	50.64	29.45	39.32	18.73	41.99	42.32	91.99	49.76	24.45	4.72	1.61	2.48	0.37
		126.9	118.57	124.51	42.89	78.8	46.71	2.99	5.72	6.26	62.99	31.58	51.6	30	40.06	19.08	42.78	43.12	93.73	50.7	24.91	3.75	1.65	2.11	0.21
		127.99	120.17	126.24	42.51	78.11	46.3	2.96	5.67	6.2	62.44	31.3	51.15	29.74	39.71	18.92	42.41	42.74	92.9	50.26	24.69	4.64	1.54	2.24	0.16
		128.11	120.38	125.11	42.67	78.4	46.47	2.97	5.69	6.23	62.67	31.42	51.34	29.85	39.85	18.99	42.56	42.9	93.25	50.45	24.78	3.7	1.41	2.11	0.21
		128.2	119.88	125.4	42.71	78.47	46.51	2.98	5.69	6.23	62.72	31.44	51.38	29.88	39.89	19	42.6	42.94	93.33	50.49	24.8	2.97	1.57	2.51	0.51
		128.92	120.97	125.97	42.87	78.76	46.69	2.99	5.72	6.26	62.96	31.56	51.58	29.99	40.04	19.07	42.76	43.1	93.68	50.68	24.89	4.92	2.07	2.44	0.27
		129.77	121.67	127.44	42.47	78.03	46.25	2.96	5.66	6.2	62.37	31.27	51.09	29.71	39.66	18.9	42.36	42.7	92.81	50.2	24.66	3.75	2.52	2.42	0.32
		129.98	121.34	127.56	42.23	77.58	45.99	2.94	5.63	6.16	62.02	31.09	50.8	29.54	39.44	18.79	42.12	42.45	92.28	49.92	24.52	3.33	2.52	2.16	0.4
		130.09	122.06	126.71	42.64	78.34	46.44	2.97	5.69	6.22	62.62	31.39	51.3	29.83	39.82	18.97	42.53	42.87	93.18	50.41	24.76	3.12	2.98	2.32	0.49
		131.19	122.49	129.31	43.05	79.1	46.89	3	5.74	6.28	63.23	31.7	51.8	30.12	40.21	19.16	42.94	43.28	94.08	50.89	25	4.94	2.17	2.52	0.48
		131.51	122.85	129.59	43.03	79.06	46.86	3	5.74	6.28	63.2	31.68	51.77	30.1	40.19	19.15	42.92	43.26	94.04	50.87	24.99	4.52	2.28	2.31	0.4
		131.98	124.04	128.79	42.91	78.84	46.74	2.99	5.72	6.26	63.02	31.59	51.63	30.02	40.08	19.09	42.8	43.14	93.78	50.73	24.92	4.47	2.58	2.58	0.1
		131.99	124.07	129.69	43.77	80.41	47.67	3.05	5.84	6.39	64.28	32.22	52.66	30.62	40.88	19.47	43.66	44	95.65	51.74	25.42	5.04	2.31	2.54	0.52
		132.3	122.68	130.34	43.77	80.42	47.67	3.05	5.84	6.39	64.28	32.23	52.66	30.62	40.88	19.48	43.66	44.01	95.65	51.75	25.42	3.99	1.57	2.5	0.24
		132.41	124.16	130.71	43.73	80.34	47.62	3.05	5.83	6.38	64.22	32.19	52.61	30.59	40.84	19.46	43.62	43.96	95.56	51.69	25.39	4.83	1.15	2.4	0.36
		132.56	120.99	130.26	44.02	80.87	47.94	3.07	5.87	6.42	64.64	32.41	52.95	30.79	41.11	19.58	43.9	44.25	96.19	52.03	25.56	4.04	1.23	2.1	0.15
		132.69	122.73	130.73	44.03	80.9	47.95	3.07	5.87	6.43	64.67	32.42	52.98	30.8	41.12	19.59	43.92	44.27	96.22	52.05	25.57	5.1	2.3	2.35	0.31
		132.78	123.87	129.94	45.41	83.42	49.45	3.16	6.05	6.63	66.68	33.43	54.62	31.76	42.41	20.2	45.29	45.65	99.22	53.67	26.37	4.63	2.02	2.18	0.45
		132.8	123.6	129.77	44.24	81.27	48.18	3.08	5.9	6.46	64.97	32.57	53.22	30.95	41.31	19.68	44.12	44.47	96.67	52.29	25.69	4.26	1.34	2.23	0.32
		134.06	123.88	132.26	44.74	82.19	48.72	3.12	5.96	6.53	65.7	32.94	53.82	31.29	41.78	19.9	44.62	44.98	97.76	52.88	25.98	3.7	2.16	2.14	0.33
		134.16	125.94	131.14	45.27	83.16	49.3	3.15	6.04	6.61	66.48	33.33	54.46	31.66	42.28	20.14	45.15	45.51	98.92	53.51	26.29	4.47	2.93	2.21	0.27
		134.73	125.64	131.64	45.05	82.76	49.06	3.14	6.01	6.57	66.16	33.17	54.2	31.51	42.07	20.04	44.93	45.29	98.44	53.25	26.16	3.81	2.82	2.34	0.41
		134.97	124.83	133.4	45.32	83.26	49.35	3.16	6.04	6.61	66.55	33.36	54.52	31.7	42.32	20.16	45.2	45.56	99.03	53.57	26.32	4.73	2.96	2.22	0.27
		135.2	126.51	131.76	44.74	82.2	48.72	3.12	5.97	6.53	65.7	32.94	53.82	31.3	41.78	19.91	44.63	44.98	97.77	52.89	25.98	3.96	1.44	2.43	0.57
		135.54	124.91	132.78	44.83	82.37	48.83	3.12	5.98	6.54	65.84	33.01	53.94	31.36	41.87	19.95	44.72	45.07	97.97	53	26.04	4.15	2.49	2.63	0.29
		136.08	126.32	133.78	44.45	81.66	48.41	3.1	5.93	6.49	65.28	32.72	53.47	31.09	41.51	19.78	44.33	44.69	97.13	52.54	25.81	4.72	1.86	2.34	0.35
		136.2	125.82	132.94	45.28	83.19	49.31	3.15	6.04	6.61	66.5	33.34	54.47	31.67	42.29	20.15	45.16	45.52	98.95	53.53	26.29	4.53	1.31	2.55	0.41
		136.22	127.1	133.91	46.29	85.05	50.42	3.23	6.17	6.76	67.99	34.08	55.69	32.38	43.24	20.6	46.18	46.54	101.16	54.73	26.88	3.32	1.55	2.21	0.22
		137.67	128.11	135.27	45.58	83.74	49.64	3.18	6.08	6.65	66.94	33.56	54.84	31.89	42.57	20.28	45.46	45.83	99.61	53.88	26.47	4.98	2.3	2.51	0.56
		138.08	128.76	135.65	45.85	84.24	49.94	3.19	6.11	6.69	67.34	33.76	55.16	32.08	42.82	20.4	45.74	46.1	100.2	54.2	26.63	5.23	2.72	2.21	0.41
		138.28	130.05	135.7	46.3	85.07	50.42	3.23	6.17	6.76	68	34.09	55.7	32.39	43.24	20.6	46.18	46.55	101.18	54.73	26.89	4.19	3.4	2.23	0.51
		138.88	128.21	135.81	46.73	85.86	50.89	3.26	6.23	6.82	68.63	34.4	56.22	32.69	43.64	20.79	46.61	46.98	102.12	55.24	27.14	4.18	2.51	2.6	0.37
		139.1	127.93	136.47	47.42	87.13	51.65	3.3	6.32	6.92	69.65	34.91	57.05	33.17	44.29	21.1	47.3	47.68	103.63	56.06	27.54	3.39	1.7	2.54	0.49
		140.21	129.12	137.93	46.86	86.1	51.04	3.26	6.25	6.84	68.82	34.5	56.38	32.78	43.77	20.85	46.74	47.11	102.41	55.4	27.21	3.71	3.11	2.39	0.29
		143.14	134.73	139.94	49.05	90.11	53.41	3.42	6.54	7.16	72.03	36.11	59	34.31	45.81	21.82	48.92	49.31	107.18	57.98	28.48	5.5	1.65	2.71	0.33
		151.18	139.63	147.87	51.69	94.97	56.3	3.6	6.89	7.54	75.92	38.06	62.19	36.16	48.28	23	51.56	51.97	112.96	61.11	30.02	3.74	3.28	2.89	0.21
		153.6	144.49	151.78	52.49	96.44	57.17	3.66	7	7.66	77.09	38.65	63.15	36.72	49.03	23.36	52.36	52.77	114.71	62.05	30.48	5.46	3.57	2.92	0.2
		157.98	149.07	155.59	53.27	97.86	58.01	3.71	7.1	7.77	78.23	39.22	64.08	37.26	49.75	23.7	53.13	53.55	116.4	62.97	30.93	5.88	2.65	2.6	0.41
		99.89	93.48	97.91	34.58	61.84	35.62	2.21	4.55	4.69	47.51	25.14	40.47	23.69	30.71	14.57	33.87	32.31	70.88	39.6	19.55	3.31	0.5	2.04	0.2
		99.94	93.32	98.69	34.74	64.37	37.33	2.34	4.27	4.59	48.33	23.34	40.67	24.29	32.26	15.48	33.39	34.18	73.54	40.15	18.67	2.32	2.46	2.12	0.26
		99.94	92.65	98.95	34.94	61.46	34.98	2.28	4.57	4.6	49.54	25.89	41.47	22.48	29.91	15.42	33.95	32.86	73.05	40.24	18.63	3.22	1.77	1.94	0.3
		99.98	93.21	98.07	33.88	65.69	36.9	2.37	4.61	4.78	47.28	23.46	39.62	24.69	31.47	14.29	34.82	33.45	70.18	38.32	18.9	4.14	2.26	1.92	0.31
		101.06	93.86	99.3	33.56	71.94	40.8	2.42	4.95	4.87	50.66	27	42.31	26.65	32.86	16.02	35.75	34.73	78.45	42.25	19.45	3.38	2.68	2.26	0.08
		101.07	93.93	100.17	36.39	71.42	38.46	2.47	4.64	4.59	51.71	27.32	44.58	25.11	35.75	16.42	34.04	34.3	80.51	40.68	21.26	3.04	1.6	2.25	0.13
		101.13	94.63	99.19	36.88	71.17	38.31	2.58	4.46	4.67	53.42	27.93	46.05	25.66	34.17	14.91	33.18	36.87	80.97	44.28	20.97	3.9	1.36	2.3	0.21
		101.2	94.27	99.03	35.37	70.44	36.9	2.37	4.71	4.66	51.3	25.22	45.38	26.68	33.81	16.87	35.55	33.79	73.87	40.78	20.29	2.58	1.34	2.01	0.05
		101.45	94.12	100.12	33.51	71.55	40.43	2.41	4.44	4.63	55.55	27.09	45.14	24.54	34.02	16.75	33.46	33.87	78.94	44.08	21.13	4.02	0.53	1.99	0.42
		101.66	93.87	100.7	33.22	72.66	39.05	2.31	4.58	5.05	52.94	27.09	44.84	24.39	32.43	15.46	34.55	35.95	77.73	39.35	21.23	4.33	2.81	2.22	0.4
Scylla paramamosain	Female	95.03	89.13	93.71	32.11	64.31	37.83	2.14	4.22	4.79	47.01	43.02	36.58	29.57	30.29	14.67	30.16	23.49	60.88	36.82	14.75	3.72	2.9	1.71	0
		95.03	89.11	93.74	32.2	60.79	37.86	2.15	4.36	4.81	49.03	39.45	39.56	30.39	29.15	14.57	30.66	22.1	58.99	37.28	14.87	4.28	3.15	3.1	0
		95.1	90.07	93.66	33.08	65.71	38.01	2.08	4.34	4.62	49.29	41.2	37.48	27.82	29.31	15.37	28.43	24.35	60.5	34.88	14.33	3.61	1.4	0.96	0
		95.12	88.23	93.59	31.94	63.24	36.14	2.12	4.37	4.53	49.34	42.01	37.99	28.82	29.91	14.79	28.69	22.86	59.28	36.6	14.53	3.96	0.85	1.56	0
		95.2	89.14	94.21	32.29	62.96	37.69	2.04	4.22	4.74	50.81	39.16	36.56	28.47	31.34	14.8	30.44	22.72	61.81	36.84	14.32	5.24	1.61	2.82	0
		95.24	89.74	93.88	31.55	62.42	38.42	2.18	4.24	4.49	50.72	41.96	38.84	28.84	31.03	14.26	29.46	23.76	59.92	36.18	14.51	3.76	1.19	2.1	0
		95.28	89.35	94.25	31.55	65.33	38.26	2	4.47	4.63	51.32	41.26	39.46	28.48	28.77	15.07	30.21	23.78	57.19	35.85	13.88	2.82	2.88	3.51	0
		95.45	90.23	93.94	33.62	59.77	37.19	2.19	4.57	4.73	49.29	40.19	37.51	29.34	28.63	15.38	28.64	22.23	60.51	36.03	14.77	4.03	1.5	1.69	0
		95.49	90.16	93.93	33.54	63.32	36.07	2.06	4.32	4.83	47.31	41.96	38.79	29.82	29.1	14.33	28.22	22.64	62	35.65	14.17	3.56	2.24	3.56	0
		95.55	88.37	94.06	31.27	60.6	36.45	2.1	4.2	4.65	48.76	39.9	38.76	28.61	29.61	13.95	30.6	22.91	62.93	35.37	14.97	4.86	2.47	1.53	0
		95.62	89.63	94.21	31.56	61.85	37.99	2.04	4.35	4.62	47.53	40.62	37.14	27.85	29.54	14.58	29.83	24.23	60.32	34.67	13.81	4.63	0.99	2.41	0
		95.64	90.02	94.28	33.48	64.83	37.3	2.1	4.43	4.86	50.19	42.45	38.34	28.22	31.6	14.96	27.74	22.79	57.76	35.23	14.32	5.17	1.75	0.92	0
		95.64	87.74	94.25	30.84	59.98	36.22	2.04	4.63	4.77	50.86	40.03	37.42	28.92	31.45	14.13	30.43	23.29	62.32	35.94	14.91	3.35	0.6	3.28	0
		95.65	90.55	94.55	31.98	60.01	35.45	2.1	4.49	4.92	48.62	43.04	36.53	27.75	29.47	15.22	28.94	23.87	60.31	35.73	14.68	2.96	2.43	3.34	0
		95.67	90.75	94.19	30.92	59.8	36.09	2.13	4.54	4.81	50.06	41.11	39.61	29.41	28.85	15.33	27.72	23.9	59.45	35.43	14.92	4.8	2.54	1.08	0
		95.68	88.05	94.58	30.93	61.04	37.55	2.18	4.3	4.6	51.65	41.55	37.36	29.23	30.43	15	29.88	22.74	57.63	36.53	14.27	3.93	0.95	2.34	0
		95.78	88.8	94.44	32.47	64.31	38.84	2.08	4.37	4.91	48.16	40.65	37.97	29.26	28.69	14.3	30.5	22.78	62.85	37.34	14.95	3.39	1.33	2.26	0
		95.79	88.18	94.79	33.65	63.8	36.45	2.1	4.61	4.58	47.59	41.9	38.6	27.8	31.64	14.82	28.74	23.19	57.59	37.38	14.06	4.23	2.32	1.45	0
		95.79	89.23	94.7	31.1	62.63	37.51	2.19	4.35	4.51	48.55	41.5	36.97	28.51	31.22	15.12	29.95	22.34	57.07	35.84	13.84	2.75	3.44	0.82	0
		95.84	90.02	94.39	33.51	64.3	35.6	2.1	4.57	4.49	48.45	42.14	38.04	28.36	30.59	14.54	27.97	22.32	59.7	36.61	14.85	4.76	0.77	1.24	0
		95.85	88.87	94.33	33.35	60.44	38.58	2.2	4.44	4.76	47.07	40.28	37.63	29.22	31.46	15.36	29.71	22.88	61.39	34.21	14.94	5.29	1.03	1.61	0
		96.06	90.61	94.52	32.39	63.93	37.72	2.04	4.4	4.89	48.69	41.83	37.36	29.13	28.79	14.58	29.54	22.87	59.12	34.74	14.88	3.46	2.95	1.07	0
		96.11	91.07	94.7	31.29	61.8	37.32	2.05	4.59	4.82	48.49	42.44	38.89	27.87	29.26	15.17	29.04	22.35	58.38	36.29	13.75	4.48	2.39	1.26	0
		96.13	91.11	94.93	33.13	60.95	37.72	2.14	4.28	4.84	51.65	40.57	36	27.78	31.25	14.07	28.79	22.48	61.83	35.63	13.79	3.82	1.81	2.7	0
		96.2	88.26	94.8	31.2	62.09	36.32	2.03	4.51	4.59	47.83	42.92	38.58	28.22	29.34	14.79	30.12	22.1	58.45	36.34	14.52	4.61	3.26	0.74	0
		96.2	88.58	95.2	32.69	63.81	35.63	2.06	4.3	4.45	52.01	41.92	35.98	29.01	30.26	15.26	29.8	23.09	62.54	34.47	14.8	2.91	0.83	2.25	0
		96.2	90.56	95.04	32.6	63.44	36.11	2.08	4.38	4.55	50.26	41.12	37.28	30.18	31.63	14.04	28.65	24	62.4	35.93	14.36	3.02	1.97	3.7	0
		96.23	89.88	94.96	30.68	61.62	36.31	2.08	4.48	4.76	49.69	42.55	38.6	29.42	31.19	14.04	28.19	22.43	57.32	34.31	14.84	2.86	1.31	3.49	0
		96.25	91.3	95.14	32.58	61.23	37.3	2.01	4.38	4.49	50.74	41.48	37.95	28.92	31.03	14.86	28.09	24.34	62.12	34.44	14.42	4.56	2.13	2.55	0
		96.29	89.15	94.97	33.13	63.74	36.45	2.2	4.55	4.65	49.78	41.47	38.58	28.12	31.37	14.71	28.76	23.87	59.29	36.24	15.07	3.4	2.08	1.07	0
		96.3	88.65	94.75	31.22	59.84	38.72	2.17	4.34	4.6	47.03	39.47	38.51	30.35	30.24	15.41	29.81	23.87	57.48	36.5	13.97	2.78	2.42	2.14	0
		96.39	90.7	95.29	32.96	64.87	36.79	2.16	4.25	4.67	49.13	40.58	36.06	28.39	30.06	14.72	28.7	22.56	60.9	36.41	14.08	4.27	1.19	2.75	0
		96.41	88.94	95.24	30.75	65.12	37.5	2.06	4.28	4.62	48.19	39.89	37.18	27.99	29.62	14.96	29.03	23.88	59.19	34.7	15.22	5.05	1.43	2.09	0
		96.41	89.6	94.88	32.81	65.73	38.01	2.12	4.53	4.48	48.47	42.27	39.1	29.99	30.05	15.05	30.38	22.81	60.37	35.26	14.57	3.02	2.77	1.4	0
		96.43	91.16	95.38	31.66	59.74	36.64	2.1	4.49	4.64	48.52	42	39.11	28.48	30.76	14.43	28.14	22.06	61.94	36.98	15.1	5.41	1.07	2.25	0
		96.49	89.51	95.41	32.19	60.15	36.96	2.12	4.45	4.79	50.48	39.83	38.22	30.12	31.55	14.41	28.7	23.52	59.7	35.39	13.83	4.27	3.33	1.87	0
		96.61	91.32	95.07	31.1	65.56	38.98	2.01	4.26	4.59	51.78	41.14	37.03	28.35	29.26	14.67	27.89	23.54	58.09	34.08	14.17	3.48	2.97	0.98	0
		96.64	89.82	95.28	33.46	61.73	37.88	2.07	4.45	4.82	51.84	41.58	36.76	29.84	30.92	15.37	29.81	23.46	59.53	35.55	14.05	5.33	0.66	3.52	0
		96.8	89.29	95.66	33.39	61.61	35.76	2.09	4.34	4.68	48.22	42.28	38.18	28.23	29.03	14.18	28.02	22.21	62.05	34.36	14.06	5.41	1.15	1.9	0
		96.94	90.55	95.67	31.21	59.71	38.22	2.12	4.51	4.61	48.76	42.89	37.11	30.09	31.67	15.37	30.14	22.28	57.02	35.79	13.84	4.37	1.69	2.44	0
		96.97	91.44	95.91	31.03	65.77	38.69	2.09	4.24	4.5	48.46	41.9	36.34	29.48	30.59	14.07	29.71	22.64	62.67	34.18	13.88	3.5	0.93	2.76	0
		97.07	89.92	96.02	33.61	59.91	35.72	2.18	4.22	4.5	51.78	39.61	38.34	27.84	29.96	15.23	28.15	23.42	58.29	36.66	14.3	4.09	2.94	3.61	0
		97.16	91.05	95.67	31.21	63.98	38.26	2.11	4.48	4.55	47.11	41.05	38.97	28.45	31.4	14.98	29.29	22.26	61.6	36.29	14.98	2.76	2.12	1.66	0
		97.18	91.27	95.73	33.26	62.15	36.15	2.05	4.58	4.83	48.16	41.02	36.5	29.46	29.72	15.15	28.05	23.31	62.78	34.56	15.16	5.17	2.95	1.28	0
		97.3	92.13	96.2	33.1	62.11	37.49	2.11	4.6	4.47	50.88	41.36	37.4	29.87	30.27	14.03	28.12	23.26	60.95	37.15	14.03	3.04	2.45	0.73	0
		97.31	89.36	95.87	31.96	62.32	35.62	2.12	4.25	4.79	48.75	42.12	36.64	27.73	30.21	14.12	29.85	22.54	57.02	34.63	13.8	4.74	0.81	2.12	0
		97.36	91.38	95.91	30.45	63.78	38.9	2.01	4.63	4.86	48.51	39.71	37.58	29.43	29.41	14.43	28.8	24.13	62.72	34.49	13.86	4.17	2.14	2.42	0
		97.37	91.19	96.17	31.02	64.15	35.91	2.21	4.52	4.58	47.28	42.94	36.56	29.97	31.66	13.98	28.87	22.11	58.06	35.38	14.38	3.48	2.03	3.64	0
		97.6	90.2	96.07	30.68	60.89	37.84	2.19	4.31	4.66	50.67	42.01	37.74	30.36	30.18	14.62	30.6	22.83	58.56	36.87	14.2	2.8	2.5	1.41	0
		97.6	89.8	96.49	32.65	65.09	35.72	2.21	4.22	4.66	48.33	40.62	39.66	30.27	29.69	14.5	30.37	23.27	62.3	35.56	13.95	4.44	2.29	3.09	0
		97.6	89.65	96.3	33.52	60.1	38.04	2.07	4.4	4.46	51.32	40.25	39.05	29.88	29.19	14.8	30.44	22.51	60.72	36.56	14.09	3.13	2.99	3.32	0
		97.6	91.4	96.48	33.04	62.93	38.12	2.02	4.49	4.81	51.58	41.82	37.8	27.87	31.23	14.97	28.67	23.28	60.47	34.96	14.44	4.12	3.45	0.75	0
		97.63	91.98	96.13	30.69	65.95	36.45	2.18	4.29	4.78	50.34	42.39	38.15	28.38	29.22	14.6	29.27	22.07	59.87	36.35	14.58	4.54	1.05	0.84	0
		97.92	92.59	96.44	43.48	82.63	42	2.82	5.81	6.43	62.97	56.06	39.77	25.16	40.16	18.53	33.04	33.13	72.47	38.49	15.2	4.37	1.47	3.03	0
		98.01	91.27	96.41	42.09	79.98	40.65	2.73	5.62	6.22	60.95	54.26	38.49	24.35	38.87	17.94	31.98	32.06	70.15	37.26	17.6	2.98	3.45	2.29	0
		98.12	92.04	96.55	35.9	68.22	34.67	2.33	4.8	5.31	51.99	46.28	32.83	20.77	33.16	15.3	27.28	27.35	59.83	31.78	17.72	4.26	2.2	0.97	0
		98.18	91.31	97.02	39.33	74.73	37.98	2.55	5.25	5.81	56.95	50.7	35.96	22.76	36.32	16.76	29.88	29.96	65.54	34.81	19.65	4.94	0.61	0.73	0
		98.2	91.38	96.65	42.27	80.33	40.83	2.75	5.65	6.25	61.22	54.5	38.66	24.46	39.05	18.02	32.12	32.21	70.46	37.42	16.1	3.45	2.22	1.79	0
		98.65	93.75	97.55	35.86	68.15	34.64	2.33	4.79	5.3	51.93	46.23	32.8	20.75	33.12	15.28	27.25	27.32	59.77	31.74	20.71	5.36	0.84	2.54	0
		98.66	91.71	96.88	34.75	66.03	33.56	2.26	4.64	5.14	50.32	44.8	31.78	20.11	32.1	14.81	26.4	26.47	57.92	30.76	18.87	5.02	1.15	3.33	0
		98.69	93.27	96.51	41.43	78.73	40.02	2.69	5.54	6.13	60	53.41	37.89	23.97	38.27	17.66	31.48	31.56	69.05	36.68	19.82	3.7	0.95	0.91	0
		98.76	93	97.77	44.52	84.6	43	2.89	5.95	6.58	64.47	57.4	40.72	25.76	41.12	18.98	33.83	33.92	74.2	39.41	17.1	4.63	1.38	2.53	0
		98.96	91.87	98.07	38.22	72.62	36.91	2.48	5.11	5.65	55.34	49.27	34.95	22.11	35.3	16.29	29.04	29.11	63.69	33.83	19	3.88	1.21	1.87	0
		98.98	92.15	97.18	40.28	76.55	38.91	2.62	5.38	5.96	58.34	51.93	36.84	23.31	37.21	17.17	30.61	30.69	67.14	35.66	17.32	5.52	2.37	0.71	0
		99	93.84	97.09	40.45	76.87	39.07	2.63	5.4	5.98	58.58	52.15	36.99	23.41	37.36	17.24	30.73	30.82	67.42	35.81	16.68	5.34	3.51	2	0
		99	92.11	97.79	38.03	72.28	36.73	2.47	5.08	5.62	55.08	49.03	34.78	22.01	35.13	16.21	28.9	28.98	63.39	33.67	17.64	5.02	1.36	1.7	0
		99	93.26	97.85	47.41	90.09	45.79	3.08	6.33	7.01	68.66	61.12	43.36	27.43	43.79	20.21	36.02	36.12	79.02	41.97	20.97	4.09	3.02	1.15	0
		99.25	92.44	98.38	35.06	66.63	33.86	2.28	4.68	5.18	50.77	45.2	32.06	20.29	32.38	14.94	26.64	26.71	58.44	31.04	19.99	2.72	3.41	2.75	0
		99.25	94.16	98.33	34.46	65.49	33.28	2.24	4.6	5.1	49.9	44.43	31.52	19.94	31.83	14.69	26.18	26.25	57.44	30.5	16.59	5.03	1.52	0.91	0
		99.31	94.4	98.38	37.89	72	36.59	2.46	5.06	5.6	54.87	48.84	34.65	21.92	34.99	16.15	28.79	28.86	63.14	33.54	17.21	2.74	1.44	0.87	0
		99.59	94.45	97.88	40.84	77.6	39.44	2.65	5.46	6.04	59.14	52.64	37.35	23.63	37.72	17.4	31.03	31.11	68.06	36.15	18.15	2.9	2.03	2.91	0
		99.63	93.41	98.56	42.69	81.13	41.23	2.77	5.7	6.31	61.82	55.04	39.04	24.7	39.43	18.2	32.44	32.52	71.15	37.79	16.22	4.7	2.65	2.56	0
		99.89	95.01	98.4	45.43	86.34	43.88	2.95	6.07	6.72	65.79	58.57	41.55	26.29	41.96	19.36	34.52	34.61	75.72	40.22	16.51	3.81	1.56	2.7	0
		99.89	94.02	97.59	38.32	72.81	37.01	2.49	5.12	5.67	55.49	49.39	35.04	22.17	35.39	16.33	29.11	29.19	63.86	33.92	21.4	3.25	3.45	3.52	0
		99.89	93.69	98.87	40.36	76.69	38.98	2.62	5.39	5.97	58.44	52.03	36.91	23.35	37.28	17.2	30.67	30.75	67.26	35.72	17.67	3.18	1.27	1.46	0
		100	93.73	97.87	35.18	66.85	33.98	2.29	4.7	5.2	50.95	45.35	32.17	20.36	32.49	14.99	26.73	26.8	58.63	31.14	15.64	3.14	0.76	1.4	0
		100.08	94.99	98.85	39.99	75.98	38.62	2.6	5.34	5.91	57.91	51.55	36.57	23.14	36.93	17.04	30.38	30.46	66.64	35.39	17.59	5.39	1.1	1.49	0
		100.09	93.87	98.6	41.65	79.15	40.23	2.71	5.57	6.16	60.32	53.7	38.09	24.1	38.47	17.75	31.65	31.73	69.42	36.87	20.69	5.19	1.29	0.71	0
		100.27	92.11	98.19	34.36	65.3	33.19	2.23	4.59	5.08	49.76	44.3	31.43	19.88	31.74	14.65	26.11	26.18	57.27	30.42	15.77	4.22	2.73	2.86	0
		100.28	95.01	98.12	37.58	71.41	36.29	2.44	5.02	5.56	54.42	48.44	34.37	21.74	34.71	16.02	28.55	28.63	62.63	33.26	20.77	4.93	1.31	1.14	0
		100.29	93.71	99.05	37.83	71.88	36.53	2.46	5.05	5.59	54.78	48.77	34.59	21.89	34.94	16.12	28.74	28.82	63.05	33.48	16.89	4.51	3.58	3.47	0
		100.47	92.37	99.43	52.26	99.31	50.47	3.39	6.98	7.73	75.68	67.37	47.79	30.24	48.27	22.27	39.71	39.81	87.1	46.26	21.53	4.26	2.58	2.17	0
		100.52	92.38	99.13	53.87	102.36	52.03	3.5	7.2	7.97	78.01	69.45	49.26	31.17	49.75	22.96	40.93	41.04	89.78	47.68	18.89	3.36	2.38	2.15	0
		100.61	92.73	98.95	34.78	66.1	33.59	2.26	4.65	5.14	50.37	44.84	31.81	20.13	32.13	14.83	26.43	26.5	57.97	30.79	19.5	5.07	0.7	3.23	0
		100.76	93.55	98.9	35.52	67.51	34.31	2.31	4.75	5.25	51.45	45.8	32.49	20.56	32.81	15.14	26.99	27.06	59.21	31.45	17.93	5.23	2.63	2.59	0
		100.97	93.16	99.88	36.11	68.61	34.87	2.35	4.82	5.34	52.29	46.55	33.02	20.89	33.35	15.39	27.44	27.51	60.18	31.96	19.87	4.05	1.02	0.86	0
		100.99	95.13	99.8	36.78	69.89	35.52	2.39	4.91	5.44	53.26	47.41	33.63	21.28	33.97	15.68	27.94	28.02	61.3	32.56	15.8	4.36	1.15	2.75	0
		101	94.63	99.51	49.88	94.78	48.17	3.24	6.66	7.37	72.23	64.3	45.61	28.86	46.07	21.26	37.9	38	83.13	44.15	21.24	3.85	3.33	1.17	0
		101.01	95.78	99.45	52.08	98.98	50.3	3.38	6.96	7.7	75.43	67.15	47.63	30.14	48.11	22.2	39.58	39.68	86.81	46.1	16.58	4.79	1.82	1.12	0
		101.09	95.96	99.97	38.63	73.42	37.31	2.51	5.16	5.71	55.95	49.81	35.33	22.36	35.68	16.47	29.36	29.43	64.39	34.2	18.89	4.1	0.71	2.68	0
		101.19	93.53	99.52	47.92	91.05	46.28	3.11	6.4	7.08	69.39	61.77	43.82	27.73	44.26	20.42	36.41	36.5	79.86	42.41	16.43	3.85	3.12	3.07	0
		101.21	94.91	99.53	40.82	77.57	39.43	2.65	5.45	6.04	59.12	52.63	37.33	23.62	37.7	17.4	31.02	31.1	68.04	36.13	21.58	4.04	3.03	2.61	0
		101.43	95.16	99.28	45.58	86.62	44.03	2.96	6.09	6.74	66.01	58.77	41.69	26.38	42.1	19.43	34.64	34.73	75.97	40.35	17.28	4.24	1.47	1.34	0
		101.65	94.8	99.6	34.82	66.16	33.63	2.26	4.65	5.15	50.42	44.88	31.84	20.15	32.16	14.84	26.45	26.52	58.03	30.82	16.06	4.47	2.37	3.67	0
		101.68	94.87	100.39	36.05	68.5	34.82	2.34	4.82	5.33	52.2	46.47	32.97	20.86	33.3	15.36	27.39	27.46	60.08	31.91	16.76	3.03	1.66	2.35	0
		101.71	95.86	100.75	33.45	63.56	32.3	2.17	4.47	4.95	48.44	43.12	30.59	19.35	30.89	14.26	25.41	25.48	55.74	29.61	17.46	5.34	1.72	1.42	0
		101.77	96.69	100.1	42.58	80.91	41.12	2.77	5.69	6.3	61.66	54.89	38.94	24.64	39.33	18.15	32.35	32.44	70.97	37.69	17.62	5.6	0.67	0.68	0
		101.8	95.19	99.7	37.86	71.95	36.57	2.46	5.06	5.6	54.83	48.81	34.63	21.91	34.97	16.14	28.77	28.84	63.1	33.52	18.7	4.78	3.1	3.59	0
		102.1	94.97	100.4	33.1	62.9	31.97	2.15	4.42	4.89	47.94	42.68	30.27	19.15	30.58	14.11	25.15	25.22	55.17	29.3	19.31	2.8	1.58	3.24	0
		102.28	94.86	100.84	34.78	66.1	33.59	2.26	4.65	5.14	50.37	44.84	31.81	20.13	32.13	14.83	26.43	26.5	57.97	30.79	19.03	5.39	3.43	1.18	0
		102.28	93.93	101.41	35.69	67.82	34.47	2.32	4.77	5.28	51.68	46.01	32.64	20.65	32.96	15.21	27.12	27.19	59.48	31.59	21.16	4.42	2.37	3.54	0
		102.68	96.01	101.37	39.96	75.94	38.6	2.6	5.34	5.91	57.88	51.52	36.55	23.12	36.91	17.03	30.37	30.45	66.61	35.38	18.79	3.76	2.9	1.09	0
		102.7	95.84	101.63	34.66	65.87	33.48	2.25	4.63	5.13	50.2	44.69	31.7	20.06	32.02	14.77	26.34	26.41	57.77	30.68	21.63	4.63	3.65	2.27	0
		102.98	96.91	101.09	37.68	71.6	36.39	2.45	5.03	5.57	54.57	48.58	34.46	21.8	34.8	16.06	28.63	28.71	62.8	33.35	16.66	3.32	3.16	1.26	0
		103.07	97.12	102.14	35.26	67.01	34.06	2.29	4.71	5.21	51.07	45.46	32.25	20.41	32.57	15.03	26.8	26.87	58.77	31.22	17.61	3.92	1.07	1.2	0
		103.12	96.02	102.22	44.64	84.83	43.11	2.9	5.96	6.6	64.65	57.55	40.82	25.83	41.23	19.03	33.92	34.01	74.4	39.51	16.55	4.41	1.6	3.5	0
		103.15	95.67	101.23	36.96	70.23	35.69	2.4	4.94	5.46	53.52	47.64	33.8	21.38	34.14	15.75	28.08	28.15	61.59	32.71	20.21	5.54	3.11	3.57	0
		103.2	98.08	101.97	46.21	87.81	44.63	3	6.17	6.83	66.92	59.57	42.26	26.74	42.68	19.69	35.11	35.2	77.02	40.9	18.22	4.59	1.98	1.49	0
		103.29	96.24	101.48	45.59	86.64	44.03	2.96	6.09	6.74	66.02	58.78	41.69	26.38	42.11	19.43	34.64	34.73	75.99	40.36	17.61	5.76	0.82	1.09	0
		103.29	95.86	101.72	39.36	74.79	38.01	2.56	5.26	5.82	57	50.74	35.99	22.77	36.35	16.77	29.91	29.98	65.6	34.84	17.45	4.51	1.29	3.58	0
		103.44	96.19	101.83	36.7	69.74	35.45	2.38	4.9	5.43	53.15	47.31	33.56	21.24	33.9	15.64	27.89	27.96	61.17	32.49	20.63	4.79	1.58	3.07	0
		103.62	97.59	102.17	34.27	65.13	33.1	2.23	4.58	5.07	49.63	44.18	31.34	19.83	31.65	14.61	26.04	26.11	57.12	30.34	16.61	5	2.26	1.6	0
		103.64	97.17	101.91	42.71	81.15	41.25	2.77	5.71	6.31	61.84	55.06	39.06	24.71	39.45	18.2	32.45	32.53	71.18	37.8	17.12	4.9	1.9	0.73	0
		103.66	95.64	101.99	41.31	78.51	39.9	2.68	5.52	6.11	59.83	53.26	37.78	23.9	38.16	17.61	31.39	31.47	68.85	36.57	21.07	5.63	2.18	2.52	0
		103.67	97.07	102.7	41.74	79.33	40.32	2.71	5.58	6.17	60.45	53.82	38.18	24.15	38.56	17.79	31.72	31.8	69.57	36.95	18.94	2.89	3.09	1.11	0
		103.86	95.82	101.81	37.02	70.34	35.75	2.4	4.95	5.47	53.61	47.72	33.85	21.42	34.19	15.78	28.13	28.2	61.69	32.77	17.91	3.13	3.3	1.99	0
		104	97.02	101.99	41.54	78.93	40.12	2.7	5.55	6.14	60.15	53.55	37.99	24.03	38.37	17.7	31.56	31.64	69.23	36.77	16.95	3.3	1.72	2.22	0
		104.17	96.61	102.59	33.96	64.54	32.8	2.21	4.54	5.02	49.18	43.78	31.06	19.65	31.37	14.48	25.81	25.87	56.6	30.06	18.18	4.94	0.99	1.86	0
		104.51	97.21	103.23	34.57	65.69	33.39	2.25	4.62	5.11	50.06	44.57	31.62	20	31.93	14.73	26.27	26.34	57.62	30.6	17.12	3.52	3.26	1.77	0
		104.52	97.24	102.99	36.39	69.15	35.14	2.36	4.86	5.38	52.7	46.91	33.28	21.06	33.61	15.51	27.65	27.72	60.65	32.21	18.24	4.27	2.13	1.53	0
		104.56	97.2	103.66	50.15	95.29	48.43	3.26	6.7	7.41	72.62	64.65	45.86	29.02	46.32	21.37	38.1	38.2	83.58	44.39	20.45	3.37	0.94	2.69	0
		104.57	98.85	103.27	52.88	100.48	51.07	3.43	7.07	7.82	76.58	68.17	48.36	30.6	48.84	22.54	40.18	40.28	88.13	46.81	16.39	3.35	1.63	1.4	0
		104.63	97.75	103.17	52.21	99.22	50.43	3.39	6.98	7.72	75.61	67.31	47.75	30.21	48.23	22.25	39.67	39.78	87.02	46.22	21.8	4.15	2.32	3.27	0
		104.78	98.63	103.67	49.59	94.23	47.89	3.22	6.63	7.33	71.81	63.93	45.35	28.69	45.8	21.14	37.68	37.78	82.65	43.9	20.29	2.93	3.49	1.41	0
		105.29	98.38	103.78	47.26	89.81	45.65	3.07	6.32	6.99	68.44	60.93	43.22	27.35	43.65	20.14	35.91	36.01	78.77	41.84	18.82	4.62	2.38	2.99	0
		105.46	98.29	104.56	42.83	81.39	41.36	2.78	5.72	6.33	62.02	55.21	39.17	24.78	39.56	18.25	32.54	32.63	71.38	37.91	20.33	4.3	3.5	2.48	0
		105.52	99.72	104.05	34.78	66.09	33.59	2.26	4.65	5.14	50.36	44.83	31.8	20.12	32.12	14.82	26.42	26.49	57.96	30.78	20.23	4.02	0.94	1.56	0
		105.53	99.65	104.28	33.69	64.03	32.54	2.19	4.5	4.98	48.79	43.44	30.81	19.5	31.12	14.36	25.6	25.67	56.15	29.82	20.66	3.91	1.51	1.5	0
		105.63	99.46	103.5	33.99	64.59	32.83	2.21	4.54	5.03	49.22	43.82	31.08	19.67	31.39	14.49	25.82	25.89	56.65	30.09	20.95	5.15	1.67	2.66	0
		105.9	99.73	104.53	33.73	64.11	32.58	2.19	4.51	4.99	48.85	43.49	30.85	19.52	31.16	14.38	25.63	25.7	56.22	29.86	19.43	3.88	3.58	2.51	0
		106.34	98.2	105.13	34.66	65.87	33.48	2.25	4.63	5.13	50.2	44.69	31.7	20.06	32.02	14.77	26.34	26.41	57.77	30.68	17.21	4.43	2.77	3.09	0
		106.65	98.48	105.12	35.05	66.61	33.86	2.28	4.68	5.18	50.76	45.19	32.06	20.28	32.38	14.94	26.64	26.71	58.42	31.03	20.57	5.89	1.3	2.59	0
		106.77	99.33	105.63	34.74	66.02	33.55	2.26	4.64	5.14	50.31	44.79	31.77	20.1	32.09	14.81	26.4	26.47	57.9	30.75	18.79	3.8	3.34	2.11	0
		106.8	100.95	105.71	34.34	65.25	33.16	2.23	4.59	5.08	49.73	44.27	31.4	19.87	31.72	14.64	26.09	26.16	57.23	30.4	22.76	5.36	0.77	1.72	0
		106.88	100.25	105.6	35.72	67.88	34.5	2.32	4.77	5.28	51.73	46.05	32.67	20.67	32.99	15.22	27.14	27.21	59.54	31.62	17.12	4.63	1.32	1.02	0
		107.06	100.4	105.69	34.35	65.27	33.17	2.23	4.59	5.08	49.74	44.28	31.41	19.87	31.72	14.64	26.1	26.17	57.24	30.4	19.46	5.8	1.24	0.83	0
		107.2	101.57	104.95	42.52	80.79	41.06	2.76	5.68	6.29	61.57	54.81	38.88	24.6	39.27	18.12	32.31	32.39	70.86	37.64	19.52	5.21	1.01	3.09	0
		107.22	101.52	106.06	34.44	65.45	33.26	2.24	4.6	5.09	49.87	44.4	31.5	19.93	31.81	14.68	26.17	26.24	57.4	30.49	20.13	5.85	2.01	1.38	0
		107.35	99.67	105.78	34.97	66.45	33.77	2.27	4.67	5.17	50.64	45.08	31.98	20.23	32.3	14.9	26.57	26.64	58.28	30.96	18.46	5.23	3.4	1.35	0
		107.5	100.13	106.15	44.32	84.22	42.81	2.88	5.92	6.55	64.18	57.14	40.53	25.65	40.94	18.89	33.68	33.76	73.87	39.23	19.19	4.47	2.4	3.79	0
		107.72	102.64	106.53	37.79	71.8	36.49	2.45	5.05	5.59	54.72	48.71	34.56	21.86	34.9	16.1	28.71	28.79	62.98	33.45	19.58	5.1	2.71	3.45	0
		107.77	101.43	106	40.25	76.48	38.87	2.61	5.38	5.95	58.29	51.89	36.81	23.29	37.18	17.15	30.58	30.66	67.08	35.63	22.8	4.15	2.6	1.05	0
		107.78	100.21	106.16	33.76	64.16	32.61	2.19	4.51	4.99	48.89	43.53	30.88	19.54	31.18	14.39	25.65	25.72	56.27	29.89	17.74	4.39	2.98	3	0
		107.87	100.48	105.69	35.28	67.05	34.08	2.29	4.71	5.22	51.09	45.49	32.27	20.42	32.59	15.04	26.81	26.88	58.8	31.23	20.93	4.9	3.41	3.46	0
		107.94	99.73	107.06	44.86	85.24	43.32	2.91	5.99	6.63	64.96	57.83	41.02	25.96	41.43	19.12	34.08	34.17	74.76	39.71	21.8	3.86	1.81	1.71	0
		108.4	101.28	106.47	40.95	77.83	39.55	2.66	5.47	6.06	59.31	52.8	37.45	23.7	37.83	17.46	31.12	31.2	68.26	36.25	21.32	4.58	1.38	0.86	0
		108.44	102.68	106.65	41.75	79.35	40.33	2.71	5.58	6.17	60.47	53.83	38.19	24.16	38.57	17.8	31.73	31.81	69.59	36.96	17.78	3.75	2.73	1.7	0
		108.46	100.09	106.92	40.65	77.24	39.26	2.64	5.43	6.01	58.86	52.4	37.17	23.52	37.54	17.32	30.88	30.96	67.74	35.98	20.27	4.21	2.22	1.06	0
		108.51	100.16	107.24	34.16	64.91	32.99	2.22	4.56	5.05	49.47	44.04	31.24	19.77	31.55	14.56	25.96	26.02	56.93	30.24	22.8	3.85	2.04	1.16	0
		108.51	101.46	106.7	35.68	67.8	34.46	2.32	4.77	5.28	51.67	46	32.63	20.65	32.95	15.21	27.11	27.18	59.47	31.58	19.63	4.31	2.38	3.08	0
		108.78	102.26	107.39	33.84	64.3	32.68	2.2	4.52	5	49	43.62	30.94	19.58	31.25	14.42	25.71	25.78	56.39	29.95	18.47	5.18	2	1.98	0
		108.78	101.67	107.74	40.77	77.48	39.38	2.65	5.45	6.03	59.04	52.56	37.29	23.59	37.66	17.38	30.98	31.06	67.95	36.09	23.07	3.23	2.05	3.43	0
		108.88	101.45	107.11	41.57	79	40.15	2.7	5.55	6.15	60.2	53.59	38.02	24.06	38.4	17.72	31.59	31.67	69.29	36.8	22.28	3.99	1.2	0.89	0
		108.92	102.2	106.64	38.07	72.34	36.77	2.47	5.09	5.63	55.13	49.08	34.82	22.03	35.16	16.23	28.93	29	63.45	33.7	19.84	4.09	0.84	3.04	0
		109.09	101.81	107.98	34.47	65.5	33.29	2.24	4.61	5.1	49.92	44.44	31.52	19.94	31.84	14.69	26.19	26.26	57.45	30.51	21.21	5.25	3.37	3.38	0
		109.56	103.66	107.74	34.55	65.65	33.36	2.24	4.62	5.11	50.03	44.54	31.59	19.99	31.91	14.72	26.25	26.32	57.58	30.58	19.72	3.75	3.38	3.05	0
		109.67	103.14	108.44	36.09	68.59	34.86	2.34	4.82	5.34	52.27	46.53	33.01	20.88	33.34	15.38	27.42	27.5	60.16	31.95	20.53	5.45	1.52	2.38	0
		109.76	103.9	108.77	40.99	77.89	39.59	2.66	5.48	6.06	59.35	52.84	37.48	23.72	37.86	17.47	31.14	31.22	68.31	36.28	22.23	5.69	3.69	2.44	0
		110.02	104.35	108.78	48.17	91.53	46.52	3.13	6.44	7.12	69.75	62.1	44.05	27.87	44.49	20.53	36.6	36.7	80.28	42.64	21.42	4.84	1.05	1.75	0
		110.07	103.19	108.22	36.1	68.6	34.87	2.34	4.82	5.34	52.28	46.54	33.01	20.89	33.34	15.39	27.43	27.5	60.17	31.96	20.43	5.02	3.4	1.27	0
		110.87	103.1	109.16	36.2	68.78	34.96	2.35	4.84	5.35	52.42	46.66	33.1	20.94	33.43	15.43	27.5	27.57	60.33	32.04	21.69	5.4	3.02	1.16	0
		110.96	103.21	109.26	36.73	69.79	35.47	2.39	4.91	5.43	53.18	47.35	33.59	21.25	33.92	15.65	27.9	27.98	61.21	32.51	19.3	5.06	1.06	3.83	0
		111.09	104.98	109.21	46.08	87.56	44.5	2.99	6.16	6.81	66.72	59.4	42.14	26.66	42.56	19.64	35.01	35.1	76.79	40.79	17.79	3.14	2.01	1.79	0
		111.51	106.33	110.59	38.06	72.33	36.76	2.47	5.09	5.63	55.12	49.07	34.81	22.02	35.16	16.22	28.92	29	63.44	33.69	18.9	4.55	3.14	2.56	0
		111.77	105.99	110.32	39.54	75.14	38.19	2.57	5.28	5.85	57.26	50.97	36.16	22.88	36.52	16.85	30.04	30.12	65.9	35	18.97	3.28	1	3.78	0
		112.04	105.26	110.98	42	79.82	40.57	2.73	5.61	6.21	60.83	54.15	38.41	24.3	38.8	17.9	31.92	32	70.01	37.18	21.44	4.99	2.62	1.59	0
		112.13	104.13	110.13	37.04	70.38	35.77	2.41	4.95	5.48	53.64	47.75	33.87	21.43	34.21	15.79	28.14	28.22	61.73	32.79	23.46	3.67	1.76	1.6	0
		112.29	105.48	110.84	46.61	88.58	45.02	3.03	6.23	6.89	67.5	60.09	42.63	26.97	43.05	19.87	35.42	35.51	77.69	41.26	18.14	4.78	2.67	1.54	0
		112.43	105.85	110.23	35.19	66.88	33.99	2.29	4.7	5.2	50.97	45.37	32.19	20.36	32.51	15	26.74	26.81	58.66	31.15	23.23	3.67	3.65	2.23	0
		112.45	104.41	110.32	42.47	80.7	41.02	2.76	5.67	6.28	61.5	54.75	38.84	24.57	39.22	18.1	32.27	32.35	70.78	37.59	20.78	5.45	3.46	1.03	0
		112.65	104.88	111.7	42.93	81.58	41.46	2.79	5.74	6.35	62.17	55.35	39.26	24.84	39.65	18.3	32.62	32.71	71.55	38	22.63	4.99	1.89	1.88	0
		113.18	104.93	111.84	34.84	66.2	33.65	2.26	4.65	5.15	50.45	44.91	31.86	20.16	32.18	14.85	26.47	26.54	58.06	30.84	22.49	4.89	3.4	2.31	0
		113.27	106.7	112.23	35.37	67.21	34.16	2.3	4.73	5.23	51.22	45.59	32.34	20.46	32.67	15.07	26.87	26.94	58.94	31.31	19.5	4.3	2.6	1.39	0
		113.33	106.37	112.16	44.72	84.98	43.19	2.9	5.98	6.61	64.76	57.65	40.9	25.87	41.3	19.06	33.98	34.07	74.53	39.58	18.77	3.86	3.17	0.93	0
		113.33	105.48	112.27	36.56	69.48	35.31	2.38	4.89	5.41	52.95	47.14	33.44	21.16	33.77	15.58	27.78	27.86	60.94	32.37	23.22	5.75	2.23	1.85	0
		113.44	107.81	111.97	38.18	72.56	36.88	2.48	5.1	5.65	55.29	49.22	34.92	22.09	35.27	16.27	29.01	29.09	63.64	33.8	23.27	3.76	2.65	3.11	0
		113.92	107.84	112.59	34.3	65.18	33.13	2.23	4.58	5.07	49.67	44.22	31.37	19.85	31.68	14.62	26.06	26.13	57.17	30.36	20.73	6.03	1.34	1.07	0
		114.26	106.51	112.28	35.6	67.65	34.38	2.31	4.76	5.26	51.56	45.9	32.56	20.6	32.88	15.17	27.05	27.12	59.34	31.51	18.77	5.66	2.03	1.22	0
		114.32	108.42	112.2	45.06	85.63	43.52	2.93	6.02	6.66	65.26	58.09	41.21	26.07	41.62	19.21	34.24	34.33	75.1	39.89	19.13	4.02	3.05	2.13	0
		114.33	107.61	112.12	33.49	63.63	32.34	2.18	4.47	4.95	48.49	43.17	30.62	19.38	30.93	14.27	25.44	25.51	55.81	29.64	18.83	4.98	3.27	1.63	0
		114.34	108.32	113.31	41.68	79.21	40.26	2.71	5.57	6.16	60.37	53.74	38.12	24.12	38.5	17.77	31.67	31.76	69.47	36.9	22.85	3.31	0.99	1.79	0
		114.67	106.94	112.83	40.84	77.6	39.44	2.65	5.46	6.04	59.14	52.64	37.35	23.63	37.72	17.4	31.03	31.11	68.06	36.15	20.11	4.83	3.08	1.38	0
		114.77	107	113.25	38.05	72.3	36.75	2.47	5.08	5.63	55.1	49.05	34.8	22.02	35.14	16.22	28.91	28.99	63.41	33.68	21.13	5.97	3.36	2.18	0
		114.85	109.19	112.8	37.33	70.93	36.05	2.42	4.99	5.52	54.05	48.12	34.14	21.6	34.48	15.91	28.36	28.44	62.21	33.04	22.67	4.73	3.29	2.56	0
		114.98	108.61	113.03	51.76	98.36	49.99	3.36	6.92	7.65	74.95	66.73	47.33	29.95	47.81	22.06	39.33	39.43	86.26	45.82	22.88	5.11	1.68	3.9	0
		115.24	107.77	113.77	34.28	65.15	33.11	2.23	4.58	5.07	49.65	44.2	31.35	19.84	31.66	14.61	26.05	26.12	57.14	30.35	24.04	3.87	1.36	3.86	0
		115.61	110.19	113.79	35.02	66.55	33.83	2.27	4.68	5.18	50.72	45.15	32.03	20.27	32.35	14.93	26.61	26.68	58.37	31	20.5	5.36	1.31	1.34	0
		115.75	108.14	114.85	36.69	69.71	35.43	2.38	4.9	5.42	53.13	47.3	33.55	21.23	33.89	15.64	27.88	27.95	61.14	32.47	19.07	5.66	2.64	2.12	0
		115.75	107.9	113.45	34.33	65.24	33.16	2.23	4.59	5.08	49.72	44.26	31.4	19.87	31.71	14.63	26.09	26.15	57.22	30.39	18.7	4.48	2.51	3.15	0
		115.76	107.03	114.39	38.23	72.65	36.92	2.48	5.11	5.65	55.36	49.29	34.96	22.12	35.31	16.29	29.05	29.13	63.72	33.84	23.11	4.93	2.28	2.38	0
		115.8	107.42	114.04	41.3	78.47	39.88	2.68	5.52	6.11	59.8	53.24	37.77	23.89	38.14	17.6	31.38	31.46	68.83	36.55	19.54	4.65	3.58	2.71	0
		115.85	106.94	113.59	46.56	88.47	44.96	3.02	6.22	6.88	67.42	60.02	42.58	26.94	43	19.84	35.38	35.47	77.59	41.21	20.06	5.51	0.99	1.08	0
		115.95	108.1	114.44	46.02	87.46	44.45	2.99	6.15	6.81	66.65	59.33	42.09	26.63	42.51	19.62	34.97	35.06	76.71	40.74	20.57	5.52	3.19	3.54	0
		116.16	107.35	115.23	43.05	81.81	41.58	2.8	5.75	6.37	62.34	55.5	39.37	24.91	39.76	18.35	32.71	32.8	71.75	38.11	23.53	6.32	3.37	2.19	0
		116.26	107.67	114.25	33.57	63.79	32.42	2.18	4.49	4.96	48.61	43.27	30.7	19.42	31	14.31	25.5	25.57	55.94	29.71	20.42	5.99	3.69	1.4	0
		116.3	108.96	114.83	37.81	71.85	36.52	2.46	5.05	5.59	54.75	48.74	34.58	21.88	34.92	16.11	28.73	28.8	63.02	33.47	24.12	6.23	1.61	1.49	0
		116.34	109.39	114.17	45.55	86.56	44	2.96	6.09	6.74	65.97	58.73	41.66	26.36	42.07	19.42	34.61	34.7	75.92	40.32	22.79	5.86	3.56	2.25	0
		116.34	108.21	114.09	38.49	73.15	37.18	2.5	5.14	5.69	55.75	49.63	35.2	22.27	35.56	16.41	29.25	29.33	64.16	34.07	23.72	5.83	3.66	3.51	0
		116.54	109.43	114.42	34.37	65.31	33.19	2.23	4.59	5.08	49.77	44.31	31.43	19.89	31.75	14.65	26.12	26.18	57.28	30.42	22.02	6.15	2.21	3.41	0
		116.56	108.43	114.77	42.48	80.72	41.03	2.76	5.68	6.28	61.51	54.76	38.85	24.58	39.23	18.1	32.28	32.36	70.8	37.6	21.71	6.32	1.42	3.33	0
		116.68	109.17	114.89	47.21	89.7	45.59	3.07	6.31	6.98	68.36	60.86	43.17	27.31	43.6	20.12	35.87	35.96	78.68	41.79	20.37	6.28	2.35	2.33	0
		117.13	110.28	115.73	34.75	66.03	33.56	2.26	4.64	5.14	50.32	44.8	31.78	20.11	32.1	14.81	26.4	26.47	57.92	30.76	24.42	4.86	2.59	3.75	0
		117.65	109.4	116.75	38.99	74.1	37.66	2.53	5.21	5.77	56.47	50.27	35.66	22.56	36.02	16.62	29.63	29.71	64.99	34.52	22.48	3.51	1.26	3.2	0
		117.69	110.36	115.53	46.74	88.81	45.14	3.04	6.24	6.91	67.68	60.25	42.74	27.04	43.17	19.92	35.51	35.6	77.89	41.37	24.27	5.33	1.97	3.37	0
		117.7	108.6	116.31	37.57	71.4	36.29	2.44	5.02	5.56	54.41	48.44	34.36	21.74	34.7	16.01	28.55	28.62	62.62	33.26	23.27	5.48	1.08	3.24	0
		117.94	110.07	116.32	35.55	67.56	34.34	2.31	4.75	5.26	51.49	45.83	32.51	20.57	32.84	15.15	27.01	27.08	59.25	31.47	24.36	4.74	2.13	2.01	0
		117.97	108.92	116.31	41.11	78.13	39.71	2.67	5.49	6.08	59.54	53	37.6	23.79	37.97	17.52	31.24	31.32	68.52	36.39	24.5	5.92	3.26	3.29	0
		118.02	108.98	115.79	46.37	88.12	44.79	3.01	6.2	6.86	67.16	59.78	42.41	26.83	42.83	19.77	35.24	35.33	77.29	41.05	20.66	5.83	3.69	1.88	0
		118.04	111.05	115.78	45.84	87.11	44.27	2.98	6.13	6.78	66.38	59.1	41.92	26.52	42.34	19.54	34.83	34.92	76.4	40.58	19.62	5.19	2.57	1.18	0
		118.16	111.12	116.01	42.87	81.46	41.4	2.78	5.73	6.34	62.08	55.26	39.2	24.8	39.59	18.27	32.57	32.66	71.45	37.95	19	3.74	3.39	2.36	0
		118.34	109.78	116.93	37.63	71.5	36.34	2.44	5.03	5.56	54.49	48.51	34.41	21.77	34.75	16.04	28.59	28.67	62.71	33.31	23.81	5.61	2.08	3.59	0
		118.44	110.54	116.55	45.37	86.22	43.82	2.95	6.06	6.71	65.7	58.49	41.49	26.25	41.91	19.34	34.47	34.56	75.62	40.16	19.88	3.69	1.39	3.16	0
		118.67	111.05	117.74	36.21	68.8	34.97	2.35	4.84	5.35	52.43	46.68	33.11	20.95	33.44	15.43	27.51	27.58	60.34	32.05	19.15	4.73	3.18	2.69	0
		118.76	110.58	117.06	34.19	64.97	33.02	2.22	4.57	5.06	49.51	44.07	31.27	19.78	31.58	14.57	25.98	26.04	56.98	30.26	22.04	6.42	1.72	2.06	0
		118.93	110.75	117.78	45.21	85.9	43.66	2.94	6.04	6.68	65.46	58.28	41.34	26.16	41.75	19.27	34.35	34.44	75.34	40.02	23.79	4.46	2.52	3.85	0
		118.96	110.06	117.32	38.09	72.38	36.78	2.47	5.09	5.63	55.16	49.1	34.83	22.04	35.18	16.23	28.94	29.02	63.48	33.71	20.11	6.45	2.87	1.79	0
		119.63	112.23	117.68	35.13	66.75	33.93	2.28	4.69	5.19	50.87	45.29	32.13	20.33	32.45	14.97	26.69	26.76	58.55	31.09	19.39	5.71	2.28	1.65	0
		119.67	112.36	117.79	39.76	75.55	38.4	2.58	5.31	5.88	57.58	51.25	36.36	23.01	36.72	16.95	30.21	30.29	66.26	35.19	20.63	5.22	2.52	2.56	0
		119.91	110.72	117.76	41.43	78.72	40.01	2.69	5.54	6.13	59.99	53.4	37.88	23.97	38.26	17.66	31.48	31.56	69.04	36.67	20.82	5.18	2.43	1.47	0
		120.02	110.93	118.28	33.46	63.59	32.32	2.17	4.47	4.95	48.46	43.14	30.6	19.36	30.91	14.26	25.42	25.49	55.77	29.62	22.95	5.25	2.32	1.76	0
		120.44	112.02	119.58	36.45	69.27	35.21	2.37	4.87	5.39	52.79	47	33.34	21.09	33.67	15.54	27.7	27.77	60.76	32.27	19.63	5.77	1.29	3.94	0
		120.99	112.71	119.45	34.13	64.87	32.97	2.22	4.56	5.05	49.43	44.01	31.22	19.75	31.53	14.55	25.94	26	56.89	30.22	23.49	5.11	2.42	3.25	0
		121.02	113.63	119.08	35.9	68.21	34.67	2.33	4.8	5.31	51.98	46.28	32.83	20.77	33.16	15.3	27.28	27.35	59.83	31.78	19.56	4.29	3.52	3.55	0
		121.09	113.73	119.43	36.15	68.69	34.91	2.35	4.83	5.34	52.34	46.6	33.06	20.92	33.39	15.41	27.46	27.54	60.24	32	21.72	4.9	3.95	3.74	0
		121.13	113.98	119.78	50.68	96.31	48.95	3.29	6.77	7.49	73.39	65.34	46.35	29.33	46.81	21.6	38.51	38.61	84.47	44.86	23.72	4.86	1.43	1.82	0
		121.14	113.29	118.84	45	85.52	43.46	2.92	6.01	6.65	65.17	58.02	41.16	26.04	41.57	19.18	34.19	34.28	75	39.83	25.26	5.86	3.48	2.75	0
		121.31	112.96	119.83	38.09	72.38	36.78	2.47	5.09	5.63	55.16	49.1	34.83	22.04	35.18	16.23	28.94	29.02	63.48	33.71	21.13	6.52	2.58	2.61	0
		121.38	113.9	119.54	40.13	76.26	38.76	2.61	5.36	5.93	58.11	51.73	36.7	23.22	37.07	17.1	30.49	30.57	66.88	35.52	20.26	4.2	2.56	2.39	0
		121.67	112.69	120.63	38.7	73.54	37.37	2.51	5.17	5.72	56.04	49.89	35.39	22.39	35.74	16.49	29.4	29.48	64.5	34.25	23.13	6.35	2.36	3.32	0
		121.96	115.08	119.72	38.62	73.38	37.3	2.51	5.16	5.71	55.92	49.78	35.32	22.35	35.67	16.46	29.34	29.42	64.36	34.18	24.72	5.06	2.59	1.81	0
		122.02	113.96	119.83	33.67	63.99	32.52	2.19	4.5	4.98	48.76	43.41	30.79	19.48	31.1	14.35	25.58	25.65	56.12	29.81	21.56	3.91	3.39	1.28	0
		122.09	114.75	120.28	36.38	69.14	35.14	2.36	4.86	5.38	52.69	46.91	33.27	21.05	33.61	15.51	27.65	27.72	60.64	32.21	24.59	4.86	1.52	2.9	0
		122.13	113.67	121.21	34.49	65.53	33.31	2.24	4.61	5.1	49.94	44.46	31.54	19.95	31.85	14.7	26.2	26.27	57.48	30.53	20.49	4.5	3.35	1.28	0
		122.19	113.53	121.26	49.49	94.05	47.8	3.22	6.61	7.32	71.68	63.81	45.26	28.64	45.72	21.1	37.61	37.71	82.49	43.81	23.57	5	3.8	2.11	0
		122.26	115.28	121.23	42.5	80.77	41.05	2.76	5.68	6.28	61.55	54.79	38.87	24.59	39.26	18.12	32.29	32.38	70.84	37.62	23.54	3.97	2.23	3.21	0
		122.31	115.43	121	35.48	67.43	34.27	2.3	4.74	5.25	51.38	45.74	32.45	20.53	32.77	15.12	26.96	27.03	59.14	31.41	24.95	5.77	3.23	1.34	0
		122.65	114.49	121.65	40.91	77.75	39.51	2.66	5.47	6.05	59.25	52.74	37.42	23.67	37.79	17.44	31.09	31.17	68.19	36.22	23.49	5.17	3.03	2.26	0
		123.21	115.68	121.74	40.63	77.21	39.24	2.64	5.43	6.01	58.84	52.38	37.16	23.51	37.53	17.32	30.87	30.95	67.71	35.96	20.94	6	2.81	1.92	0
		123.88	114.92	122.29	46.91	89.14	45.31	3.05	6.27	6.94	67.93	60.48	42.9	27.14	43.33	19.99	35.64	35.74	78.19	41.53	24.96	3.86	2.85	1.65	0
		124.56	115.9	123.31	36.25	68.89	35.02	2.36	4.84	5.36	52.5	46.74	33.16	20.98	33.49	15.45	27.55	27.62	60.42	32.09	23.3	5.97	1.9	2.39	0
		125.12	117.39	122.88	39.14	74.38	37.8	2.54	5.23	5.79	56.68	50.46	35.79	22.65	36.15	16.68	29.74	29.82	65.23	34.65	22.54	3.79	3.19	3.03	0
		125.43	117.03	123.86	35.84	68.1	34.61	2.33	4.79	5.3	51.9	46.2	32.77	20.74	33.1	15.27	27.23	27.3	59.73	31.72	22.29	6.65	2.03	1.5	0
		126.02	118.13	125.06	34.72	65.99	33.54	2.26	4.64	5.13	50.29	44.77	31.76	20.09	32.07	14.8	26.38	26.45	57.87	30.74	22.02	3.82	3.82	4.1	0
		126.13	117.5	124.84	41.41	78.69	39.99	2.69	5.53	6.12	59.96	53.38	37.87	23.96	38.25	17.65	31.46	31.55	69.01	36.65	25.88	4.8	3.97	3.31	0
		126.27	117.9	124.66	44.5	84.56	42.98	2.89	5.95	6.58	64.44	57.36	40.69	25.75	41.1	18.96	33.81	33.9	74.16	39.39	20.48	4.03	2.91	2.86	0
		126.84	117.91	125.75	35.86	68.14	34.63	2.33	4.79	5.3	51.93	46.23	32.79	20.75	33.12	15.28	27.25	27.32	59.76	31.74	24.95	6.14	2.06	2.98	0
		127.18	118.42	126.3	36.22	68.83	34.98	2.35	4.84	5.36	52.46	46.7	33.13	20.96	33.46	15.44	27.52	27.6	60.37	32.06	26.06	4.29	3.61	1.49	0
		127.8	120.49	125.52	42.85	81.43	41.39	2.78	5.73	6.34	62.06	55.25	39.19	24.8	39.58	18.26	32.56	32.65	71.42	37.93	23.48	4.18	2.66	2.51	0
		128.21	119.6	126.97	40.81	77.55	39.41	2.65	5.45	6.03	59.09	52.61	37.32	23.61	37.69	17.39	31.01	31.09	68.01	36.12	20.91	6.81	1.67	3.31	0
		128.38	119.83	127.43	40.63	77.21	39.24	2.64	5.43	6.01	58.84	52.38	37.16	23.51	37.53	17.32	30.87	30.95	67.71	35.96	23.21	5.63	1.51	1.9	0
		128.79	121.49	127.52	47.27	89.82	45.65	3.07	6.32	6.99	68.45	60.93	43.23	27.35	43.66	20.15	35.91	36.01	78.78	41.84	21.73	5.57	2.31	1.57	0
		128.93	121.01	127.18	36.25	68.89	35.02	2.36	4.84	5.36	52.5	46.74	33.16	20.98	33.49	15.45	27.55	27.62	60.42	32.09	24.8	5.57	2.69	2.2	0
		129.26	121.56	127.76	37.49	71.24	36.21	2.44	5.01	5.54	54.29	48.33	34.28	21.69	34.62	15.98	28.48	28.56	62.48	33.18	24.31	6.54	2.03	3.34	0
		129.44	122.32	128.55	35.43	67.32	34.22	2.3	4.73	5.24	51.3	45.67	32.4	20.5	32.72	15.1	26.92	26.99	59.04	31.36	24.26	5.3	1.91	2.66	0
		129.78	122.76	128.42	37.17	70.64	35.9	2.41	4.97	5.5	53.83	47.92	33.99	21.51	34.33	15.84	28.24	28.32	61.95	32.9	24.98	6.38	2.71	4.17	0
		129.87	121.74	128.65	36.5	69.37	35.26	2.37	4.88	5.4	52.86	47.06	33.38	21.12	33.72	15.56	27.74	27.81	60.84	32.31	25.16	4.03	1.68	4.07	0
		129.89	122.42	127.88	35.9	68.22	34.67	2.33	4.8	5.31	51.99	46.28	32.83	20.77	33.16	15.3	27.28	27.35	59.83	31.78	24.3	4.93	1.99	2.46	0
		130.6	121.82	129.56	39.33	74.73	37.98	2.55	5.25	5.81	56.95	50.7	35.96	22.76	36.32	16.76	29.88	29.96	65.54	34.81	24.07	5.93	2.46	1.92	0
		130.93	123.25	129.45	42.52	80.8	41.07	2.76	5.68	6.29	61.58	54.82	38.89	24.6	39.27	18.12	32.31	32.39	70.87	37.64	25.4	4.43	2.98	4.17	0
		131.27	122.62	129.64	42.13	80.05	40.69	2.74	5.63	6.23	61.01	54.31	38.53	24.38	38.91	17.95	32.01	32.09	70.21	37.29	22.6	5.61	3.37	4.02	0
		131.65	122.78	129.63	39.47	75	38.12	2.56	5.27	5.84	57.16	50.88	36.1	22.84	36.46	16.82	29.99	30.07	65.78	34.94	23.55	4.93	2.95	2.33	0
		132.1	123.8	131.24	37.04	70.39	35.77	2.41	4.95	5.48	53.64	47.75	33.88	21.43	34.21	15.79	28.14	28.22	61.74	32.79	26.8	4.32	1.76	2.65	0
		132.12	124.92	130.62	42.89	81.5	41.42	2.79	5.73	6.34	62.11	55.29	39.22	24.82	39.61	18.28	32.59	32.67	71.48	37.96	25.34	4.4	3.14	2.85	0
		132.15	123.57	130.81	41.5	78.85	40.08	2.7	5.54	6.14	60.09	53.49	37.95	24.01	38.33	17.69	31.53	31.61	69.16	36.73	26.41	6.41	2.96	2.34	0
		132.26	123.51	130.68	40.31	76.6	38.93	2.62	5.39	5.96	58.38	51.97	36.87	23.33	37.23	17.18	30.63	30.71	67.19	35.68	22.45	5.26	3.48	1.97	0
		132.76	124.21	130.95	40.11	76.21	38.73	2.61	5.36	5.93	58.08	51.7	36.68	23.21	37.04	17.09	30.47	30.55	66.84	35.5	21.94	6.5	1.57	3.87	0
		132.8	124.59	131.12	32.53	61.82	31.42	2.11	4.35	4.81	47.11	41.94	29.75	18.82	30.05	13.86	24.72	24.78	54.22	28.8	24.58	5.45	3.78	3.82	0
		133.15	124.87	131.62	33.21	63.1	32.07	2.16	4.44	4.91	48.09	42.81	30.37	19.22	30.67	14.15	25.23	25.3	55.35	29.4	24.96	6.11	1.39	2.18	0
		133.23	125.87	131.51	34.96	66.43	33.76	2.27	4.67	5.17	50.62	45.06	31.97	20.23	32.29	14.9	26.56	26.63	58.26	30.94	27.25	6.97	2.81	3.57	0
		133.65	126.41	132.54	48.72	92.57	47.05	3.16	6.51	7.2	70.55	62.8	44.55	28.19	45	20.76	37.02	37.11	81.19	43.12	26.59	6.52	1.89	3.72	0
		133.86	125.42	131.84	51.45	97.76	49.69	3.34	6.87	7.61	74.5	66.32	47.05	29.77	47.52	21.93	39.09	39.19	85.74	45.54	24.74	5.09	3.95	3.4	0
		133.89	126.13	132.19	50.78	96.5	49.05	3.3	6.79	7.51	73.54	65.47	46.44	29.38	46.91	21.64	38.59	38.69	84.64	44.95	26.09	5.19	2.94	1.99	0
		134.49	126.97	132.88	48.14	91.48	46.49	3.13	6.43	7.12	69.71	62.06	44.03	27.86	44.46	20.52	36.58	36.67	80.23	42.61	27.38	5.03	3.14	3.51	0
		134.66	127.33	132.96	41.4	78.67	39.98	2.69	5.53	6.12	59.95	53.37	37.86	23.95	38.24	17.64	31.45	31.54	68.99	36.64	27.18	7.01	1.68	3.7	0
		135.07	127.94	134.08	33.35	63.37	32.21	2.17	4.46	4.93	48.29	42.99	30.5	19.29	30.8	14.21	25.34	25.4	55.58	29.52	23.91	4.43	1.96	2.1	0
		136.51	126.66	134.26	32.56	61.86	31.44	2.11	4.35	4.81	47.14	41.97	29.77	18.84	30.07	13.88	24.74	24.8	54.26	28.82	25.14	5.64	3.15	4.19	0
		137.15	128	134.99	32.3	61.38	31.2	2.1	4.32	4.78	46.78	41.64	29.54	18.69	29.84	13.77	24.54	24.61	53.84	28.59	25.84	5.35	4.27	4.32	0
		137.23	128.68	135.7	40.91	77.73	39.51	2.66	5.47	6.05	59.24	52.73	37.41	23.67	37.78	17.43	31.08	31.16	68.18	36.21	22.9	5.26	3.69	1.69	0
		137.78	128.11	135.88	36.18	68.75	34.94	2.35	4.83	5.35	52.39	46.64	33.09	20.93	33.42	15.42	27.49	27.56	60.3	32.02	27.27	6.58	1.81	1.87	0
		138.79	129.68	137.43	40.7	77.34	39.31	2.64	5.44	6.02	58.94	52.47	37.22	23.55	37.59	17.35	30.92	31.01	67.83	36.03	23.23	5.11	4.29	3.21	0
		138.84	128.17	136.58	33.12	62.94	31.99	2.15	4.43	4.9	47.97	42.7	30.29	19.17	30.59	14.12	25.17	25.23	55.21	29.32	23.51	4.63	2.75	3.64	0
		139.54	129.43	138.67	33.8	64.23	32.65	2.2	4.52	5	48.95	43.58	30.91	19.56	31.22	14.41	25.68	25.75	56.34	29.92	25.66	6.14	3.39	2.45	0
		139.87	129.17	138.31	35.55	67.55	34.33	2.31	4.75	5.26	51.48	45.83	32.51	20.57	32.83	15.15	27.01	27.08	59.25	31.47	25.4	6.55	1.73	4.26	0
		140.48	130.67	138.35	49.31	93.7	47.62	3.2	6.59	7.29	71.41	63.57	45.09	28.53	45.54	21.02	37.47	37.56	82.18	43.65	26.8	5.1	4.35	4.33	0
		141.01	131.55	138.97	51.97	98.76	50.19	3.38	6.94	7.68	75.26	67	47.53	30.07	48	22.15	39.49	39.59	86.62	46	26.14	5.88	2.31	2.2	0
		141.3	130.06	139.08	48.73	92.61	47.07	3.17	6.51	7.21	70.57	62.83	44.57	28.2	45.01	20.77	37.03	37.13	81.22	43.14	23.76	7.26	1.7	4.04	0
		144.1	134.43	142.32	33.94	64.49	32.78	2.2	4.53	5.02	49.15	43.75	31.04	19.64	31.35	14.46	25.79	25.85	56.56	30.04	23.59	6.14	3.71	2.92	0
		144.39	136.06	142.63	32.85	62.43	31.73	2.13	4.39	4.86	47.58	42.35	30.05	19.01	30.35	14	24.96	25.03	54.76	29.08	24.18	5.98	3.01	2.65	0
		144.68	133.47	143.8	33.15	62.99	32.02	2.15	4.43	4.9	48	42.73	30.32	19.18	30.62	14.13	25.19	25.25	55.25	29.34	23.4	5.95	2.62	2.48	0
		146.57	136.19	145.58	35.06	66.63	33.86	2.28	4.68	5.18	50.77	45.2	32.06	20.29	32.38	14.94	26.64	26.71	58.44	31.04	23.78	5.35	3.5	3.77	0
		146.89	135.74	145.31	35.45	67.37	34.24	2.3	4.74	5.24	51.34	45.7	32.42	20.51	32.74	15.11	26.94	27.01	59.09	31.38	29.17	5.44	1.94	4.19	0
		147.46	137.23	146.24	35.14	66.77	33.94	2.28	4.7	5.2	50.89	45.3	32.14	20.33	32.46	14.98	26.7	26.77	58.56	31.1	27	7.62	3.76	1.95	0
		148.39	138.83	146.89	39.63	75.3	38.27	2.57	5.3	5.86	57.39	51.09	36.24	22.93	36.6	16.89	30.11	30.19	66.05	35.08	29.42	7.29	3.2	2.59	0
		148.76	137.59	147.87	47	89.3	45.39	3.05	6.28	6.95	68.06	60.59	42.98	27.19	43.41	20.03	35.71	35.8	78.33	41.6	24.95	5.28	4.01	4.21	0
		148.89	138.59	147.84	34.32	65.22	33.15	2.23	4.59	5.07	49.7	44.25	31.39	19.86	31.7	14.63	26.08	26.15	57.2	30.38	26.2	7.43	2.57	1.91	0
		150.65	140.37	149.5	42.91	81.55	41.45	2.79	5.73	6.35	62.14	55.32	39.25	24.83	39.64	18.29	32.61	32.69	71.52	37.99	24.84	5.32	2.91	2.73	0
		151.75	141.87	150.19	34.84	66.2	33.65	2.26	4.65	5.15	50.45	44.91	31.86	20.16	32.18	14.85	26.47	26.54	58.06	30.84	29.94	5.29	2.58	3.39	0
		153.18	144.32	151.38	35.37	67.21	34.16	2.3	4.73	5.23	51.22	45.59	32.34	20.46	32.67	15.07	26.87	26.94	58.94	31.31	29.88	7.11	2.58	4.22	0
		153.47	143.45	152.32	44.03	83.66	42.52	2.86	5.88	6.51	63.76	56.76	40.26	25.47	40.66	18.76	33.45	33.54	73.38	38.97	27.86	5.04	3.67	1.5	0
		115.8	107.42	114.04	41.3	78.47	39.88	2.68	5.52	6.11	59.8	53.24	37.77	23.89	38.14	17.6	31.38	31.46	68.83	36.55	19.54	4.65	3.58	2.71	0
Scylla serrata	Male	145.35	136.57	143.55	42.96	96.22	55.94	3.48	7.29	7.54	69.16	72.61	56.45	34.4	41.38	21.57	46.51	44.77	108.21	55.88	26.54	3.13	2.21	2.12	2.31
Scylla serrata	Female	75.11	69.83	74.15	24.84	47.81	28.8	1.62	3.35	3.5	37.4	31.17	28.69	22.21	22.86	10.95	22.04	17.57	45.85	27.48	11.02	3.17	2.11	2.35	1.92
		83.33	78.1	81.78	27.16	52.57	30.74	1.75	3.73	3.88	40.46	33.59	31.04	23.88	25.78	12.23	24.79	19.12	50.78	30.44	12.22	2.976	1.97	2.021	1.88
SH 1	Male	95.03	87.41	95.14	31.59	65.38	37.51	1.44	4.39	4.18	46.73	42.74	35.52	21.67	34.77	15.85	30.16	33.96	71.64	40.43	20.42	1.62	0.7	1.14	0
		95.04	88.6	95.08	29.92	67.61	38.99	1.56	4.24	4.34	46.37	41.27	34.75	21.7	33.6	15.66	30.75	34.63	71.42	38.15	19.55	1.59	0.74	1.06	0
		95.13	89.47	96.07	31.97	65.76	38.48	1.54	4.35	4.12	50.1	43.82	34.91	20.95	34.53	16.29	29.75	33.51	72.01	40.56	19.98	1.65	0.95	1.11	0
		95.15	89.21	96.25	31.03	63.88	39.44	1.43	4.25	4.27	50.01	42.33	33.07	21.57	34.86	16.2	29.16	32.84	77.01	39.39	19.12	1.66	0.57	1.09	0
		95.16	88.36	95.26	30.95	68.25	40.77	1.53	4.4	4.12	47.61	40.24	34.08	20.02	33.94	16.4	31.42	35.38	72.96	39.8	19.77	1.31	0.57	0.91	0
		95.35	86.78	97.04	29.43	64.55	38.06	1.42	4.61	4.2	47.12	43.29	35.24	20.92	33.96	15.25	29.38	33.08	75.43	38.62	19.31	1.31	0.68	1.23	0
		95.38	90.72	97.16	31.79	67.61	36.64	1.43	4.63	4.29	47.66	40.33	34.95	20.45	32.75	15.99	30.7	34.57	72.43	38.62	19.78	1.47	0.92	1.26	0
		95.41	87.9	96.82	30.84	61.84	36.53	1.47	4.66	4.13	46.52	40.58	35.63	19.77	34.8	14.76	28.85	32.49	74.07	40.14	18.6	1.3	0.72	1.27	0
		95.47	91.15	95.58	29.49	62	38.6	1.42	4.3	4.16	49.78	43.42	34.5	20.64	32.46	15.53	28.5	32.09	74.25	38.47	19.99	1.39	0.61	0.98	0
		95.52	88.11	96.09	32.28	63.88	39.2	1.54	4.53	4.52	51.05	43.44	33.3	21.63	33.93	15.9	31.17	35.1	69.49	38.15	19.5	1.28	0.8	1.21	0
		95.52	90.57	95.96	30.4	65.33	38.13	1.47	4.54	4.39	50.9	42.13	34.83	20.74	34.57	16.11	30.03	33.82	70.48	37.5	20.03	1.4	0.57	0.92	0
		95.61	88.53	96.31	32.13	67.45	36.78	1.54	4.63	4.28	47.8	41.66	36.18	20.19	32.25	15.55	31.1	35.02	76.65	38.48	19.86	1.64	0.57	0.89	0
		95.64	88.39	96.8	31.8	62.76	37.85	1.5	4.35	4.39	46.61	44.62	32.82	19.98	34.37	15.34	31.22	35.16	71.84	41.07	19.19	1.25	1	0.9	0
		95.72	88.62	96.47	31.09	64.09	38.55	1.54	4.28	4.15	47.1	43.85	35.3	20.32	32.86	15.74	31.19	35.12	71.44	38.94	19.11	1.5	0.76	1.23	0
		95.73	91.62	96.27	29.04	65.17	39.88	1.42	4.27	4.09	51.02	40.69	34.01	19.6	32.51	16.42	29.29	32.99	72.04	39.43	19.82	1.54	0.82	1.09	0
		95.75	91.07	97.58	31.08	64.91	36.52	1.42	4.42	4.13	48.72	40.93	33.18	21.74	33.06	15.61	30	33.78	69	40.11	19.7	1.61	0.75	1.1	0
		95.75	89.25	95.85	29.97	63.48	38.71	1.5	4.58	4.45	47.8	41.72	33.46	20.28	33.72	16.24	29.49	33.2	75.03	38.92	18.9	1.43	1	0.92	0
		95.93	88.73	97.82	29.13	65.71	39.36	1.49	4.6	4.32	49.52	42.15	33.45	20.56	32.07	15.91	31.28	35.23	70.61	41.2	19.83	1.52	0.76	0.93	0
		95.94	89.72	97.33	29.95	68.37	39.25	1.47	4.51	4.57	48.07	42.02	32.56	20.53	32.66	16.33	30.92	34.82	71.29	39.76	19.12	1.67	0.95	0.91	0
		95.94	88.32	97.26	32.01	65.26	38.7	1.55	4.22	4.51	47.85	42.66	35.76	20.3	31.57	16.06	31.19	35.12	74.7	40.58	18.66	1.26	0.99	1.23	0
		95.97	90.74	97.1	30.19	63.36	38.67	1.46	4.3	4.2	47.27	40.55	35.94	21.38	33.74	15.81	30.72	34.6	69.88	40.86	19.03	1.38	0.61	1.26	0
		95.97	87.79	97.5	31.23	66.44	40.23	1.47	4.56	4.17	47.31	40.18	34.1	19.56	34.04	14.74	29.06	32.73	76.18	40.85	20.43	1.51	0.63	1.23	0
		96.07	91.41	96.22	29.99	68.33	39.23	1.43	4.65	4.39	51.42	40.67	32.95	21.07	31.95	15.73	30.85	34.74	69.08	41.24	18.81	1.57	0.9	0.97	0
		96.1	90.67	97	30.51	62.21	38.25	1.4	4.52	4.33	49.26	40.33	35.07	20.11	34.63	15.29	30.52	34.37	70.15	37.93	20.59	1.54	1.01	1.29	0
		96.2	89.49	96.42	30.92	64.54	39.57	1.45	4.57	4.34	51.31	41.71	32.84	20.81	31.44	15.82	28.53	32.13	73.51	38.88	18.66	1.66	0.89	1.13	0
		96.24	91.71	97.44	29.06	66.66	40.74	1.51	4.42	4.34	48.02	42.18	34.16	21.85	31.46	15.05	30.94	34.84	76.15	41.29	20.46	1.56	0.9	0.96	0
		96.24	92.2	97.71	30.92	65.96	39.48	1.44	4.6	4.5	49.21	40.84	33.59	19.85	33.09	15.65	28.46	32.05	71.44	40.84	19.5	1.39	0.66	1.15	0
		96.25	89.21	98.22	29.65	61.82	40.48	1.5	4.52	4.55	50.52	43.2	35.84	21.66	31.83	15.95	30.52	34.37	72.05	41.15	18.81	1.44	0.71	1.14	0
		96.35	91.86	97.11	31.64	67.97	39.32	1.47	4.55	4.11	50.75	40.67	35.23	20.94	33.49	15.18	31.22	35.16	72	38.44	18.9	1.28	0.67	1.32	0
		96.36	88.59	97.33	30.96	64.94	39.01	1.52	4.21	4.21	48.34	44.16	34.79	21.07	32.55	15.09	30.73	34.61	75.5	39.95	19.43	1.28	0.63	1.11	0
		96.41	90.15	97.95	29.88	64.94	38.03	1.44	4.41	4.35	49.92	42.79	34.74	21.42	31.86	15.01	28.71	32.33	73.94	37.41	18.91	1.61	0.73	1.23	0
		96.42	92.22	98.24	32.1	67.46	39.82	1.51	4.32	4.15	48.6	43.41	35.87	19.84	34.35	15.64	28.27	31.83	75.23	38.75	20.11	1.3	0.63	0.94	0
		96.43	91	97.69	29.13	65.36	39	1.5	4.65	4.31	49.9	43.2	32.69	20.33	32.93	15.85	30.35	34.18	71.58	38.52	19.45	1.27	0.77	1.23	0
		96.5	89.28	96.57	29.69	67.87	37.19	1.49	4.19	4.36	48.66	41.92	36.15	21.02	34.05	15.7	28.91	32.55	71.94	41.18	19.58	1.55	0.65	0.92	0
		96.62	89.23	97.15	29.74	64.17	38.99	1.44	4.53	4.27	49.15	42.23	34.74	21.37	33.22	15.37	31.19	35.13	72.07	38.77	19.52	1.46	0.87	0.92	0
		96.66	89.89	98.24	31.22	65.74	36.82	1.44	4.32	4.32	51.34	43.48	34.85	21.02	31.36	15.15	30.51	34.36	70.21	38.8	18.74	1.25	0.74	1.06	0
		96.67	90.4	96.96	30.72	67.64	39.75	1.4	4.24	4.26	46.81	43.6	32.67	20.38	31.75	14.79	28.53	32.13	71.22	41.1	18.7	1.51	0.86	0.95	0
		96.68	90.06	96.84	32.25	61.76	38.17	1.44	4.6	4.28	50.55	44.61	35.44	21	32.88	15.69	28.18	31.73	69.59	40.1	19.37	1.42	0.84	1.22	0
		96.68	88.66	97.37	30.38	65.58	39.75	1.46	4.47	4.36	47.15	41.09	34.57	20.68	34.42	15.88	29.94	33.71	69.81	37.71	19.09	1.4	0.73	0.97	0
		96.68	89.99	97.83	29.97	66.62	36.73	1.4	4.56	4.2	49.3	44.26	33.93	20.51	31.51	15.32	30.6	34.46	71.02	37.78	20.15	1.65	0.83	1.09	0
		96.8	89.97	97.28	29.46	65.61	37.78	1.5	4.37	4.32	47.78	41.48	33.95	21.03	33.84	15.51	30.34	34.17	69.31	38.22	19.89	1.3	0.93	1.02	0
		96.81	92.37	97.16	29.08	65.06	37.54	1.43	4.21	4.2	49.87	41.83	32.59	20.8	31.63	16.38	30.99	34.9	75.54	39.35	19.4	1.7	0.69	1	0
		96.86	92.26	97.54	31.61	66.75	38.42	1.41	4.66	4.43	50.98	43.94	34.36	21.63	32.97	15.73	30.67	34.54	69.06	38.79	19.86	1.26	0.8	0.98	0
		96.89	91.47	97.8	30.37	62.29	40.67	1.53	4.27	4.41	48.96	42.61	36.15	20.02	33.79	16.22	28.56	32.16	70.13	40.3	18.74	1.36	0.7	0.96	0
		96.93	92.51	97.28	30.46	66.07	38.88	1.52	4.65	4.54	47.62	44.05	35.85	20.31	33.12	15.14	28.97	32.62	75.29	39.4	19.74	1.25	0.65	1.22	0
		97.09	92.59	98.26	31.15	64.29	38.66	1.46	4.64	4.25	46.43	41.86	35.45	20.94	32.36	15.59	28.32	31.89	69.05	39.77	20.11	1.35	0.91	1.11	0
		97.1	88.98	97.59	30.19	61.35	38.94	1.45	4.55	4.11	47.97	42.58	35.49	21.51	34.02	15.67	31.09	35.01	70.38	39.26	20.54	1.28	0.57	1.23	0
		97.1	91.5	98.9	29.58	68.29	39.53	1.55	4.45	4.32	48.6	43.63	33.41	20.95	33.17	15.94	28.76	32.39	73.07	37.98	19.49	1.32	0.8	1.12	0
		97.34	88.81	97.68	31.91	63.75	39.03	1.51	4.31	4.57	46.88	44.57	35.52	21.42	33.35	14.81	29.08	32.74	75.8	37.71	19.46	1.41	0.57	1.25	0
		97.4	90.65	98.25	31.52	64.54	39.34	1.42	4.32	4.35	48.32	42.54	36.25	20.82	32.22	15.77	29.91	33.68	76.45	40.31	18.97	1.3	1.01	0.92	0
		97.44	88.8	97.5	30.5	65.34	40.37	1.4	4.49	4.24	48.65	44.14	34.78	20.18	31.28	16.05	29.74	33.49	76.07	37.83	20.44	1.29	1	1.08	0
		97.49	88.63	98.6	30.7	68.04	38.35	1.5	4.66	4.18	49.32	43.51	35.32	20.3	32.6	15.21	30.43	34.27	72.61	39.33	20.07	1.26	0.94	0.91	0
		97.54	91.64	97.75	31.47	68.24	39.4	1.5	4.43	4.31	48.35	42.7	34.79	21.64	33.05	15.39	31.22	35.16	70.36	40.08	19	1.28	0.71	1.06	0
		97.55	91.79	97.8	30.1	64.33	39.09	1.49	4.47	4.25	51.2	43.68	35.63	20.25	32.66	15.72	28.83	32.46	72.19	41.65	19.34	1.41	0.99	1.21	0
		97.56	90.64	98.32	30.69	68.25	39.49	1.48	4.67	4.46	49.45	44.51	33.41	20.58	31.28	15.92	29.49	33.21	73.27	38.46	20.56	1.31	0.79	1.18	0
		97.59	91.28	97.95	30.41	61.39	37.85	1.52	4.58	4.32	50.51	43.13	33.77	20.06	32.58	14.77	31.09	35.02	73.67	40.32	20.27	1.42	0.78	1.29	0
		97.61	91.21	97.72	31.3	65.17	38.33	1.5	4.51	4.43	50.28	41.35	33.02	20.19	32.3	15.67	30.97	34.88	69.46	39.15	18.73	1.57	0.67	1.3	0
		97.62	88.98	97.92	31.79	66.3	39.65	1.53	4.45	4.38	50.62	41.42	35.51	20.35	33.85	15.39	28.67	32.29	70.85	40.59	18.95	1.33	0.89	1.23	0
		97.63	89.29	98.79	30.85	61.55	39.37	1.48	4.53	4.1	47.04	40.94	33.45	20.7	33.36	14.69	28.83	32.46	70.93	38.56	20.3	1.37	0.66	1.2	0
		97.67	91.72	97.84	29.32	68.2	37.61	1.46	4.2	4.23	50.02	42.47	33.18	21.31	32.54	15.86	28.2	31.76	75.89	40.73	18.54	1.64	0.93	1.24	0
		97.71	92.71	99.46	30.87	64.67	40.22	1.55	4.63	4.21	49.52	43.4	35.89	20.8	34.9	16.3	29.9	33.67	70.64	37.44	19.32	1.28	0.6	1.18	0
		97.73	89.44	99.69	29.99	65.64	37.79	1.45	4.19	4.57	49.68	43.31	33.29	20.54	34.32	15.72	30.52	34.37	74.95	38.32	19.16	1.28	0.69	1.09	0
		97.89	89.02	98.82	31.21	67.79	38.23	1.52	4.3	4.21	47.68	40.1	33.79	20.44	34.85	16.31	31.11	35.03	69.36	39.16	19.22	1.5	0.76	1.24	0
		97.94	89.03	98.03	29.93	63.37	39.74	1.42	4.59	4.2	48.71	41.06	32.65	20.71	32.88	15.77	31.42	35.38	76.7	37.85	18.89	1.6	0.84	1.27	0
		97.96	91.04	98.04	30.27	68.41	38.83	1.5	4.45	4.54	47.33	40.48	35.73	20.44	31.92	15.52	29.72	33.47	73.66	38.57	19.75	1.58	0.96	1.3	0
		97.97	89.05	99.54	30.88	66.81	37.25	1.41	4.38	4.11	50.87	44.13	34.33	20.57	33.82	15.04	30.28	34.1	73.85	41.25	20.44	1.63	0.76	1.04	0
		97.98	92.51	98.17	29.65	63.78	40.67	1.55	4.43	4.25	46.54	41.67	34.71	21.54	32.07	15.33	29.71	33.46	71.81	38.28	19.22	1.31	0.7	1.29	0
		98.13	90.11	99.12	32.09	68.13	37.53	1.41	4.47	4.22	49.77	44.65	32.48	20.07	33.7	15.15	30.41	34.24	71.98	38.08	19.69	1.52	1	1.05	0
		98.31	90.74	99.37	30.18	66.38	40.1	1.43	4.53	4.2	50.97	42.96	32.81	19.93	33.43	15.31	29.98	33.76	69.65	40.81	18.76	1.61	0.57	1.31	0
		98.32	90.79	100.22	29.65	61.53	38.26	1.45	4.3	4.44	51.03	44.27	36.11	21.05	33.03	16.31	28.55	32.15	71.13	38.32	20.6	1.59	0.6	1.27	0
		98.34	91.64	99.37	31.26	65.73	38.37	1.52	4.63	4.13	49.9	41.26	32.48	21.69	33.94	16.12	28.28	31.84	72.22	38.33	19.53	1.57	0.96	1.06	0
		98.35	93.02	99.66	31.41	63.77	36.56	1.51	4.49	4.12	48.76	44.77	32.93	20.64	33.74	15.46	28.78	32.41	74.66	40.33	19.11	1.5	0.79	1.04	0
		98.41	91.46	99.09	30.93	61.89	38.23	1.4	4.21	4.23	46.92	44.57	34.26	20.76	34.76	15.02	30.29	34.11	69.25	38.39	20.43	1.35	0.73	1.01	0
		98.56	90.96	99.64	29.52	62.04	38.31	1.46	4.56	4.47	46.69	40.7	35.59	21	33.93	14.83	31.21	35.14	74.04	39.67	18.48	1.28	0.93	1.14	0
		98.58	93.39	100.39	30.94	62.65	39.45	1.47	4.4	4.52	47.63	43.33	34.56	20.56	33.83	15.84	29.7	33.45	74.53	39.47	20.62	1.55	0.83	0.97	0
		98.59	91.23	99.99	32.08	64.81	40.3	1.51	4.6	4.24	51.77	42.36	33.26	20.95	34.39	16.24	30.71	34.58	73.65	41.67	19.02	1.66	0.69	1.29	0
		98.68	93.06	98.76	31.28	65.56	40.12	1.5	4.63	4.51	46.4	40.86	33.78	20.33	31.62	14.95	31.02	34.93	69.55	37.81	18.82	1.65	0.92	0.98	0
		98.72	92.92	99.19	30.78	67.6	40.73	1.5	4.47	4.28	49.8	43.02	35.2	21.76	32.27	16.35	28.86	32.5	72.24	41.14	20.58	1.66	1.04	1.04	0
		98.83	91.38	100.58	31.61	63.63	39.62	1.44	4.45	4.24	47.6	43.45	35.86	21.57	34.76	15.43	31.36	35.31	74.8	37.54	19.86	1.39	0.79	1.2	0
		98.88	90.27	100.73	30.39	63.18	37.03	1.55	4.36	4.51	49.05	42.73	35.64	20.34	32.72	15.27	28.48	32.07	75.93	39.7	20.13	1.57	0.78	1.05	0
		98.91	90.06	100.53	29.25	64.02	37.35	1.42	4.46	4.15	51.29	43.05	33.54	20.38	31.8	16.19	29.92	33.69	72.18	40.89	18.77	1.43	0.92	1.3	0
		98.95	91.21	100.08	30.69	68.23	39.48	1.49	4.39	4.46	50.24	44.31	34.99	21.79	32.28	14.79	31.21	35.14	71	39.33	20.11	1.57	0.61	1	0
		99.11	93.09	100.97	29.53	62.22	36.79	1.52	4.34	4.33	50.37	42.43	35.62	20.83	32.33	15.82	29.18	32.86	71.66	38.02	19.92	1.47	1.01	0.94	0
		99.28	93.79	100.9	32.25	62.82	37.89	1.54	4.64	4.22	50.07	41.27	32.92	21.82	31.43	15.25	29.39	33.1	70.79	38.51	20.22	1.63	0.76	1.19	0
		99.34	93.77	100.74	30.45	61.56	37.4	1.51	4.33	4.48	49.08	44.58	35.44	19.72	33.63	16.06	30.3	34.12	69.72	39.46	18.6	1.64	0.9	1.03	0
		99.39	93.4	99.43	32.08	64.46	37.04	1.53	4.44	4.31	48.02	43.79	33.93	20.36	32.21	15.32	29.29	32.98	74.54	41.14	20.38	1.33	1.05	1.18	0
		99.4	90.65	99.95	29.13	64.7	39.76	1.47	4.63	4.52	50.98	42.66	36.3	21.03	33.06	16.24	30.25	34.07	74.45	41.38	20.49	1.74	0.59	1.01	0
		99.49	90.87	100.94	29.46	63.67	40.36	1.46	4.41	4.38	46.42	40.6	34.01	19.94	33.03	15.9	28.94	32.59	73.92	38.99	18.87	1.32	0.9	1.29	0
		99.66	94.44	100.15	31.47	64.69	40.14	1.45	4.57	4.19	50.33	40.34	36.06	21.02	32.72	15.49	31.42	35.39	72.49	37.69	19.37	1.38	0.92	1.06	0
		99.72	94.12	101.62	30.42	63.54	39.18	1.54	4.24	4.23	46.37	41.94	33.93	19.58	34.36	15.06	28.34	31.91	73.79	39.08	19.12	1.58	0.84	1.21	0
		99.73	94.73	100.47	30.75	66.82	38.6	1.44	4.29	4.17	49.88	41.66	32.48	21.15	33.23	16.23	28.2	31.75	69.53	37.75	18.98	1.45	0.8	1.2	0
		99.74	93.57	100.08	32.17	62.6	39.35	1.44	4.3	4.22	47.65	43.58	34.1	21.87	32.82	14.8	31.3	35.24	76.12	41.26	18.84	1.64	0.79	1.18	0
		99.78	92.17	99.82	32.22	65.7	38.08	1.55	4.4	4.51	50.55	41.18	34.61	19.93	31.5	15.2	28.47	32.06	76.77	41.42	19.67	1.67	1.02	0.99	0
		99.84	94.77	99.99	29.7	67.78	37.46	1.44	4.38	4.36	47.71	42.63	32.53	21.34	34.68	16	29.15	32.83	72.82	38.76	19.62	1.4	0.82	1.02	0
		100.61	93.75	101.38	37.06	64.47	47.46	1.79	5.23	4.71	49.64	48.46	40.67	21.73	39.82	17.53	34.14	38.45	82.84	42.6	24.3	1.55	0.64	1.08	0
		100.69	94	102.16	32.43	73.24	40.92	1.54	5.5	5.31	54.17	42.49	42.43	22.71	35.82	17.89	32.5	36.6	81.56	41.67	20.32	1.66	0.93	0.97	0
		100.85	94	102.19	33.47	68.01	44.72	1.7	4.79	5.32	52.41	45.74	40.54	21.18	38.48	15.43	30.1	33.9	75.94	42.02	19.31	1.57	0.85	1.36	0
		100.95	94.73	101.15	33.95	75	40.91	1.59	5.42	4.96	48.32	42.16	39.11	24.31	36.05	16.66	32.75	36.88	82.48	39.3	19.87	1.73	0.76	1.27	0
		101.09	94.79	101.34	35.99	65.13	42.15	1.48	5.22	4.75	59.29	41.81	42.14	24.05	38.34	16.34	32.15	36.21	77.59	44.13	23.61	1.71	0.8	1.07	0
		101.11	92.34	102.59	32.03	73.83	38.68	1.68	5.18	4.75	51.91	43.59	34.09	24.6	36.24	17.91	34.74	39.12	81.5	44.08	22.11	1.55	0.62	1.37	0
		101.67	93.3	102.75	38.15	76.91	42.39	1.49	4.84	4.7	56.8	50.51	38.5	23.31	39.2	18.84	36.38	40.96	78.49	40.28	21.43	1.45	0.63	1.26	0
		101.9	96.83	103.03	36.85	67.39	46.55	1.74	5	4.93	56.74	50.18	38.15	24.72	34.74	17.37	36.55	41.16	83.72	47.13	22.4	1.71	0.73	1.25	0
		101.99	93.38	103.21	31.51	80.14	46.05	1.79	5.1	5.14	52.58	45.27	42.51	25.8	35.75	16.11	31.13	35.05	90.06	46.03	20.56	1.52	1	0.95	0
		102.08	94.6	103	36.77	75.78	41.43	1.58	5.16	4.63	56.16	44.61	34.13	22.68	32.63	18.26	33.59	37.82	83.82	39.04	22.34	1.56	1.01	1.16	0
		102.16	94.14	102.25	33.78	64.56	46.63	1.6	4.43	4.84	50.79	52.79	40.64	22.8	39.12	15.74	32.86	37.01	91.09	46.02	23.77	1.71	0.83	1.17	0
		102.32	95.84	104.21	38.1	76.53	38.2	1.67	5.53	5.29	59.15	44.29	38.48	23.73	33.36	18.73	29.84	33.6	83.12	40.25	21.25	1.38	0.67	1.31	0
		102.47	93.85	103.66	32.17	66.46	45.15	1.47	4.45	4.94	53.03	50.51	39.52	22.52	32.77	16.65	32.66	36.78	88.24	46.46	20.15	1.52	0.99	1.12	0
		103.02	96.42	103.71	32.46	67.3	42.61	1.84	5.31	5.08	53.86	52.69	40.26	23.95	34.48	16.73	36.78	41.42	78.74	44.38	20.05	1.62	0.68	1.28	0
		103.16	95.76	104.52	38.01	67.12	39.49	1.67	4.76	4.43	49.89	50.15	38.22	20.91	36.35	17.39	35.12	39.55	74.33	48.62	21.15	1.69	0.67	1.03	0
		103.23	95.12	105.02	36.29	68.2	46.91	1.46	5.23	4.48	51.61	48.54	42.48	21.17	34.07	18.84	31.76	35.76	81.68	44.37	20.59	1.75	0.62	1.18	0
		103.23	94.28	104.18	31.24	79.68	43.61	1.69	4.39	4.64	51.11	46.96	39.38	20.81	39.62	15.85	32.84	36.98	86.17	42.41	24.15	1.38	0.74	1.24	0
		103.42	96.22	105.11	32.98	73.47	41.18	1.76	5.22	5.15	54.23	42.82	36.34	23.41	37.34	18.23	33.07	37.24	89.22	43.87	22.48	1.48	0.67	1.36	0
		103.45	96.81	104.53	33.5	79.99	46.71	1.79	4.61	4.4	58.74	50.75	35.39	25.77	35.82	17.1	37.14	41.83	78.72	47.79	24.38	1.7	0.75	1.15	0
		103.84	96.09	104.23	36.94	76.18	40.04	1.58	5.21	5.03	54.48	41.94	36.37	21.04	36.68	19.28	36.31	40.88	78.15	45.71	21.6	1.66	0.72	1.21	0
		104	97.43	104.26	32.84	80.2	40.16	1.67	5.53	4.96	52.05	52.54	39.49	23.37	39.71	15.71	36.25	40.82	81.67	45.94	21.99	1.57	1.08	1.4	0
		104.1	96.23	104.53	38.2	70.17	46.29	1.49	5.17	4.79	52.06	45.58	36.11	24.05	37.1	17.16	32.29	36.36	82.56	42.1	20.11	1.36	0.93	1.41	0
		104.31	95.54	105.46	31.23	72.95	38.21	1.47	4.54	4.33	57.82	47.99	33.9	20.53	33.34	16.54	35.19	39.62	90	49.04	23.55	1.43	0.88	1.03	0
		104.35	98.03	105.8	33.88	74.62	46.72	1.49	4.94	5.39	58.57	41.81	38.48	24.9	34.09	16.75	32.47	36.57	77.82	44.76	23.82	1.59	0.89	1.15	0
		104.37	97.95	106.11	32.02	68.83	45.15	1.76	5.08	4.97	54.49	48.21	40.99	22.68	40.79	19.15	32.46	36.55	88.48	47.89	20.81	1.51	0.84	1.16	0
		104.52	97.7	105.16	32.98	80.1	41.66	1.81	5.4	5.17	60.24	47.09	42.16	25.68	34.39	16.12	37.06	41.73	78.49	46.45	23.18	1.51	0.95	1.22	0
		104.55	97.97	106.1	37.13	71.83	45.13	1.48	4.78	4.49	52.59	52.97	34.8	20.66	34.25	15.47	34.41	38.75	72.24	48.65	22.86	1.54	0.68	0.99	0
		104.71	96.61	104.97	38.08	75.59	45.29	1.78	4.39	5.21	57.9	46.62	36.59	23.02	34.96	16.59	31.69	35.68	82.74	38.96	22.79	1.73	0.65	1.01	0
		104.88	96.38	105.12	35.9	70.74	39.21	1.49	4.93	5.31	56.37	48.49	38.54	21.71	33.73	16.37	30.01	33.8	87.2	40.62	23.1	1.59	0.95	1.16	0
		104.98	98.32	105.45	31.45	71.49	43.01	1.6	5.24	4.29	49.18	47.6	36.56	22.26	34.83	16.67	32.05	36.09	72.89	47.57	23.39	1.44	0.71	1.1	0
		105.37	96.69	106.14	36.62	64.5	46.28	1.57	5.13	5.2	61.2	43.34	35.54	23.4	38.52	19.07	29.67	33.41	84.19	49.15	23.26	1.61	0.92	1.19	0
		105.42	98.47	106.86	30.62	73.87	39.98	1.48	5.28	5.4	55.95	49.2	41.29	24.14	34.71	15.72	33.29	37.49	77.03	48.61	23.74	1.66	0.99	1.4	0
		105.62	98.46	105.82	34.35	77.68	44.47	1.71	4.88	5.27	54.92	47.58	35.44	23.28	40.96	16.47	35.45	39.92	82.72	48.83	20.86	1.58	0.94	1.17	0
		105.63	97.85	106.03	32.35	67.68	44.98	1.71	5.43	4.72	52.42	49.95	39.06	22.76	35.4	18.62	35.88	40.41	74.52	40.73	20.8	1.47	0.73	1.2	0
		105.83	97.19	106.96	35.65	72.86	42.39	1.76	5.05	4.49	61.11	52.76	39.5	21.08	32.84	17.18	30.83	34.72	77.32	45.62	21.64	1.7	0.87	1.03	0
		105.89	98.81	107.41	31.29	79.1	45.31	1.79	4.56	5.1	60.61	43.38	40.52	24.48	41.13	15.62	30.91	34.8	87.27	48.7	22.37	1.64	0.92	1.08	0
		106.05	99.31	107.69	30.59	76.37	48.12	1.46	5.05	4.42	55.12	48.12	37.62	24.02	41	15.76	33.8	38.06	71.95	41.94	24.39	1.56	0.99	1.05	0
		106.07	99.8	107.23	35.07	79.97	45.2	1.46	5.28	4.85	50.98	51.72	42.21	20.78	41.18	16.54	31.95	35.98	80.4	44.8	19.43	1.55	0.84	1.07	0
		106.36	100.24	107.24	34.71	66.62	44.56	1.79	5.53	5.01	56.65	49.29	38.35	25.49	37.4	16.9	36.65	41.27	78.28	39.43	21.93	1.4	0.73	1.31	0
		106.38	99.5	106.75	35.83	65.3	39.24	1.8	5.25	5.01	58.51	48.83	41.24	21.93	40.65	15.54	33.16	37.34	77.34	43.46	20.95	1.6	0.8	1.27	0
		106.45	100.23	106.86	30.65	69.84	42.51	1.49	4.63	5.01	49.03	50.04	40.97	22.63	38.21	18.98	29.57	33.3	77.81	48.29	23.4	1.81	1.11	1.43	0
		107.13	100.94	107.36	35.46	64.62	43.18	1.73	5.53	5.3	60.67	52.8	37.45	25.76	35.49	18.15	35.25	39.69	84.68	46.13	22.3	1.64	0.74	1.1	0
		107.22	98.88	108.78	36.49	69.82	38.18	1.65	4.45	4.92	49.07	42.66	40.47	23.74	33.41	18.69	36.96	41.62	82.75	40.55	20.44	1.45	0.93	1.29	0
		107.26	98.3	107.59	35.37	69.86	39.33	1.51	4.52	4.81	57.85	51.63	41.25	25.38	36.72	15.34	37.04	41.71	77.09	44.71	20.78	1.59	1.08	1.22	0
		107.31	99.63	108.67	33.16	73.72	38.24	1.6	5.3	4.29	55.54	50.86	38.24	23.52	35.69	16.23	32.65	36.76	83.77	45.47	21.01	1.45	1.06	1.16	0
		107.44	101.41	107.6	31.34	68.01	40.45	1.64	5.48	5.12	58.19	42.6	41.72	23	38.91	15.62	31.92	35.94	81.24	41.95	21.44	1.85	0.69	1.32	0
		107.66	100.42	108.98	34.79	77.39	40.28	1.59	5.42	4.91	57.52	52.11	40.25	22.7	38.48	16.82	33.37	37.58	77.09	42.77	22.06	1.44	0.76	1.15	0
		107.7	99.94	108.4	37.73	75.97	47.93	1.48	4.88	4.43	57.64	50.47	34.91	22.66	37.82	16.07	32.86	37	88.41	47.1	22.88	1.79	0.88	1.4	0
		107.74	100.34	108.26	34.42	67.04	39.99	1.52	4.91	4.98	50.81	47.03	42.8	21.13	40.74	16.38	31.69	35.69	74.87	39.84	24.03	1.74	0.68	1.4	0
		107.74	100.04	108	35.7	74.8	46.9	1.68	4.89	4.32	53.95	46.29	39.57	23.52	36.04	19	31.45	35.42	85.4	46.82	24.39	1.57	0.82	1.2	0
		107.74	99.38	108.69	35.78	74.39	44.76	1.79	4.54	4.9	49.51	51.72	41.98	22.33	33.45	16.38	36.31	40.89	79.33	40.6	20.24	1.77	0.76	1.41	0
		107.76	99.29	109.48	31.91	66.01	38.22	1.73	4.4	5.38	55.82	46.89	36.95	24.9	36.62	16.35	32.78	36.92	87.63	45.08	23.41	1.7	0.86	1.28	0
		107.77	100.88	107.96	33.47	79.94	42.64	1.71	5.3	5.11	53.97	46.64	39.9	22.47	35.31	18.79	30.59	34.45	78.65	41.8	23.02	1.5	1.02	1.16	0
		108.01	100.2	109.62	33.09	78.5	46.41	1.79	4.75	5.09	48.37	47.71	34.21	20.99	33.4	15.6	32.2	36.26	78.46	47.1	23.87	1.8	1.02	1.35	0
		108.1	100.35	108.46	30.6	72.39	38.89	1.62	5.14	5.33	52.55	50.24	38.25	21.81	37.73	17.31	30.57	34.42	83.74	46.28	23.44	1.82	0.86	1.29	0
		108.3	101.71	109.91	33.75	75.11	42.05	1.79	4.51	5.14	57.31	46.63	42.75	23.54	33.03	16.97	36.38	40.97	85.74	39.36	19.52	1.58	0.94	1.23	0
		108.42	101.24	109.49	37.16	76	47.86	1.84	4.73	5	57.6	48.28	37.71	20.47	33.96	17.95	29.72	33.47	90.44	40.97	23.87	1.86	1	1.36	0
		108.48	102.18	109.44	33.35	66.51	43.98	1.47	4.44	5.09	52.91	46.85	35.03	25.25	38.72	15.72	34.21	38.52	87.27	49.09	24.2	1.58	0.69	1.44	0
		108.54	101.36	110.3	32.93	77.38	40.32	1.66	4.46	5.03	58.67	47.73	42.88	25.75	36.17	19.05	35.33	39.78	82.53	44.1	19.65	1.87	1.03	1.46	0
		108.62	99.86	109.6	34.18	73.41	44.27	1.51	4.81	5.34	56.25	49.88	34.04	23.77	39.57	17.34	35.55	40.03	72.99	43.47	20.31	1.52	0.86	1.16	0
		108.86	100.7	109.18	32.77	74.21	39.89	1.62	4.58	5.14	48.74	42.55	36.7	21.97	36.86	16.35	30.91	34.81	75.82	44.04	22.62	1.59	0.92	1.42	0
		108.91	100.24	109.56	36.16	73.58	41.54	1.72	4.84	4.5	59.36	50.02	36.07	24.71	40.13	16.21	36.24	40.8	90.19	43.89	21.35	1.65	0.85	1.34	0
		109.01	102.9	110.51	35.35	74.79	42.29	1.77	4.92	4.75	58.4	48.07	42.13	22.92	36.88	16.95	30.36	34.18	87.51	49.1	23.46	1.78	0.68	1.31	0
		109.1	103.02	110.94	36.78	70.97	39.97	1.51	5.01	4.98	57.02	52.6	38.99	23.34	34.45	15.95	35.18	39.61	79.14	48.58	21.66	1.58	0.7	1.18	0
		109.15	102.77	111.05	33.66	65.49	42.93	1.67	5.31	5.17	55.82	47.04	35.28	21.12	35.23	16.7	34.45	38.8	88.64	39.52	21.64	1.86	0.89	1.44	0
		109.45	100.46	109.5	36.05	64.19	44.3	1.64	4.39	4.94	60.81	48.83	39.82	25.3	37.86	17.36	32.81	36.95	77.39	45.2	24.17	1.82	0.88	1.23	0
		109.47	102.83	110.27	30.67	65.86	40.34	1.54	5.53	5.06	48.89	49.25	36.64	25.29	33.05	19.21	31.81	35.82	74.7	40.59	19.99	1.5	0.77	1.37	0
		109.73	101.94	111.23	30.35	68.5	40.96	1.68	4.48	5.24	56.43	48.02	38.07	24.22	36.93	19.17	34.45	38.79	79.46	40.39	22.36	1.79	0.85	1.42	0
		109.91	102.79	111.87	35.64	66.2	45.87	1.56	4.91	5.2	53.18	51.66	35.51	21.89	34.33	18.41	36.16	40.72	80.69	46.03	19.89	1.65	1.1	1.4	0
		109.98	101.93	111.52	35.63	71.53	46.71	1.5	4.46	5.13	59.82	44.05	35.65	23.82	40.97	19.38	34.91	39.31	72.49	43.66	24.13	1.45	0.98	1.11	0
		109.98	101.06	111.12	33.15	69.78	38.72	1.53	4.89	5.36	54.91	44.71	38.11	24.91	34.63	18.61	34.12	38.42	83.09	41.61	22.24	1.58	0.92	1.47	0
		110.07	102.82	110.84	34.6	76.63	41.26	1.57	5.34	4.95	51.83	50.39	42.36	22.33	34.14	17.04	31.76	35.76	74.24	47.41	19.6	1.76	0.79	1.37	0
		110.19	102.07	111.67	38.26	68.94	39.32	1.84	5.43	4.78	59.79	42.52	39.69	22.37	32.67	18.06	32.3	36.38	77.58	45.79	23.95	1.47	0.76	1.19	0
		110.24	101.59	111.01	34.43	79.95	38.88	1.75	5.46	4.38	50.55	46.94	41.83	25.03	37.86	18.72	35.5	39.97	77.17	44.7	21.73	1.81	1.11	1.23	0
		110.29	104.01	110.94	35.01	74.5	46.56	1.71	5.5	5.1	59.28	47.18	38.58	21.99	38.79	17.71	30.7	34.57	82.15	42.11	20.18	1.86	1.12	1.45	0
		110.38	104.15	111.13	32.17	66.75	43.95	1.69	4.97	5.39	49.19	51.54	35.61	24.6	38.94	16.69	29.64	33.38	71.98	43.17	19.93	1.7	0.99	1.29	0
		110.82	104.13	112.1	33.69	78.93	42.35	1.76	4.41	5.34	56.72	48.12	37.83	20.92	36.22	18.15	32.39	36.48	84.78	43.28	22.8	1.66	0.73	1.28	0
		110.88	104.46	110.89	33.94	78.34	43.54	1.77	5.15	5.08	52.8	47.1	38.56	20.45	36.66	16.89	30.19	34	73.58	43.73	22	1.58	0.87	1.5	0
		110.97	102.63	112.45	35.71	73.05	43.47	1.57	5.06	5.13	49.81	45.25	34.29	25.5	35.43	17.03	34.61	38.98	89.88	47.08	22.64	1.52	0.86	1.21	0
		111.2	102.68	112.66	30.49	75.76	47.1	1.54	4.95	4.65	58.25	44.76	34.46	22.35	34.25	18.2	31.84	35.85	72.44	46.61	19.29	1.49	0.97	1.16	0
		111.26	102.5	112.58	36.1	64.76	47.65	1.62	4.93	4.6	59.97	51.11	40.64	22.32	37.64	19.38	32.6	36.71	90.04	40.46	19.5	1.89	0.87	1.05	0
		111.31	103.01	111.68	34.61	79.43	40.78	1.57	5.3	4.81	55.32	47.45	37.2	21.87	35.76	16.79	30.07	33.87	84.56	43.12	19.65	1.87	1.06	1.16	0
		111.48	102.8	111.6	30.92	65.76	47.07	1.69	5.48	4.39	53.29	49.58	40.45	21.16	38.84	15.54	36.22	40.79	78.81	41.45	21.87	1.9	1.13	1.4	0
		111.49	104.82	112.12	34.41	71.35	39.93	1.63	4.78	4.7	48.81	48.56	39.59	24.76	39.68	19.23	32.4	36.49	88.39	45.16	24.23	1.69	1.04	1.1	0
		111.55	104.1	113.04	38.07	80.36	38.17	1.7	4.64	4.74	50.85	45.7	39.74	22.03	39.24	17.09	36.43	41.02	85.05	43.32	21.45	1.72	1.06	1.17	0
		111.77	104.71	113.61	32.77	70.58	45.88	1.8	5.38	4.49	49.85	43.21	40.52	23.74	38.02	19.15	35.11	39.54	79.67	48.27	20.38	1.79	0.89	1.16	0
		111.81	105.63	112.62	33.71	79.41	47.97	1.83	5.33	4.63	52.9	49.52	42.43	21.2	40.73	19.42	31.75	35.75	74.86	48.69	19.95	1.51	0.81	1.11	0
		111.85	103.76	111.95	35.05	73.93	39.84	1.59	4.94	4.6	49.48	52.06	41.42	21.29	38.32	15.5	36.46	41.05	90.18	42.95	21.68	1.78	1.03	1.4	0
		112.14	103.41	113.95	31.87	78.91	44.41	1.47	4.71	4.55	48.84	50.3	40.61	23.32	40.98	18.15	36.03	40.58	87.15	47.53	20.41	1.61	0.75	1.31	0
		112.37	105.66	113.16	33.83	67.27	44.24	1.47	4.42	5.1	52.09	45.75	39.36	25.72	38.72	18.94	31.18	35.12	74	42.85	20.86	1.66	0.9	1.41	0
		112.38	103.88	112.55	31.02	66.82	46.8	1.78	5.33	4.82	61.13	48.05	37.72	21.44	33.15	17.9	36.08	40.63	82.56	43.48	24.3	1.59	1.09	1.39	0
		112.44	105.27	114.36	31.07	73.18	47.73	1.76	5.27	5.27	52.17	49.99	34.86	20.63	34.64	17.77	33.55	37.78	85.23	46.52	20.8	1.56	0.77	1.29	0
		112.5	103.62	113.74	30.77	68.93	38.69	1.64	4.69	5.23	54.94	52.87	41.02	21.51	37.14	16.88	32.86	37	83.88	44.92	24.14	1.51	0.85	1.11	0
		112.6	106.09	114.39	33.01	63.87	38.56	1.5	5.29	4.39	58.06	50.35	36.38	22.47	39.78	18.2	34.41	38.75	72.72	47.44	19.7	1.69	1.01	1.24	0
		112.89	105.86	113.78	37.35	79.96	40.11	1.82	5.5	4.75	50.08	52.08	41.66	23.73	40.22	16.67	32.56	36.66	87.54	41.68	22.52	1.56	0.88	1.17	0
		112.94	106.25	114.63	33.79	64.43	44.24	1.71	4.54	5.03	59.03	44.13	34.05	24.05	33.76	15.38	34.11	38.41	81.89	40.01	22.71	1.69	0.72	1.23	0
		113.01	105.86	114.16	33.55	65.17	43.42	1.84	4.39	4.89	59.75	45.96	36.69	21.07	39.3	16.08	34.7	39.08	73.98	40.49	20.87	1.5	1.13	1.27	0
		113.02	104.65	114.69	36.66	70.04	45.07	1.65	4.92	5.01	52.18	48.81	42.73	20.68	37.75	18.32	33.04	37.2	73.53	42.66	23.27	1.61	0.78	1.48	0
		113.22	105.66	114.12	34.97	66.88	47.21	1.54	4.78	5.16	50.29	51.34	38.6	25.76	36.14	17.82	33.02	37.18	78.16	44.26	24.29	1.87	1	1.4	0
		113.32	106.06	114.51	31.63	67.92	47.03	1.79	4.72	4.36	51.69	44.67	41.73	20.62	38.13	17.81	34.98	39.39	72.61	43.85	21.14	1.88	0.9	1.54	0
		113.47	107.02	113.76	37.66	73.55	45.75	1.47	4.69	4.37	51.56	50.49	36.07	25.38	38.11	19.31	37.01	41.68	89.06	48.44	21.27	1.72	0.97	1.52	0
[truncated: 355 more rows]
