# Supplementary material for: Morphological descriptions and morphometric discriminant function analysis reveal an additional four groups of Scylla spp
Source: PeerJ. 2020 Jan 3;8:e8066. doi: 10.7717/peerj.8066 (PMC6944125; doi:10.7717/peerj.8066)
Supplement: Table S6 [file peerj-08-8066-s006.xlsx]

## Sheet: S4
Supplementary Table S6: The mean carapace width, CW (mm) of male and female mud crab genus Scylla.
	S. olivacea	S. tranquebarica	S. paramamosain	SH 1	SH 2
Male
Mean ± sd	111.91 ± 13.24	114.0953 ± 13.95	111.42 ± 11.73	108.57 ± 11.00	113.67 ± 9.77
95% CI for Mean
Lower bound	111.25	113.36	110.82	107.43	112.01
Upper bound	112.58	114.83	112.03	109.71	115.33
n	1524	1399	1441	300	136
Female
Mean ± sd	107.35 ± 9.98	108.18 ± 10.93	110.12 ± 12.33	104.96 ± 8.00	-
95% CI for Mean
Lower bound	106.83	108.65	109.49	103.45	-
Upper bound	107.86	109.71	110.75	106.46	-
n	1447	1635	1474	111	-
